# Supplementary material for: Crystalline matrix-activated spin-forbidden transitions of engineered organic crystals
Source: Royal Society of Chemistry journal article supplement (doi:10.1039/d3cp00187c), 2023-01-01
Supplement: d3cp00187c1.pdf [file d3cp00187c1.pdf]

## Supporting Information

### Crystalline Matrix Activated Spin-Forbidden Transitions of Engineered Organic Crystals

Heming Zhang,<sup>1</sup> Lianbao Ke,<sup>1</sup> Yufang Nie,<sup>1</sup> Zhengqian Tu,<sup>1</sup> Jiaxuan Wang,<sup>1</sup> Semion K. Saikin,<sup>3</sup>  
Hai Bi,<sup>1\*</sup> Yue Wang<sup>2</sup>

1. Jihua Laboratory, Huandaonan road #28, Nanhai district, Foshan, Guangdong Province, China;
2. Jilin University, Qianjin street #2699, Changchun, Jilin Province, China.
3. Kebotix, Inc., 501 Massachusetts Avenue, Cambridge, MA 02139, the United States of America.

#### Experimental methods:

##### (1) Fabrication of engineered crystals: double-film annealing method

$\text{Alq}_3$  was purchased from Aladdin corporation (Shanghai, China).  $\text{Gaq}_3$  was purchased from Sigma-Aldrich.  $\text{Al}(\text{qBr}_2)_3$  was synthesized according to the previously reported method<sup>1</sup>. In a round bottle  $\text{AlCl}_3 \cdot 6\text{H}_2\text{O}$  (266 mg, 1.1 mmol) and 5,7-dibromo-8-hydroxyquinoline (1 g, 3.3 mmol) was added. 30 mL Methanol was then slowly added and the mixture was allowed to react overnight at room temperature. Afterwards, the mixture was neutralized by 1 mol  $\text{L}^{-1}$  aqueous solution of NaOH and the precipitated greenish-yellow solid was filtered, washed with  $\text{H}_2\text{O}$ ,  $\text{CH}_3\text{OH}$  and  $\text{Et}_2\text{O}$  and dried in vacuum. Then evaporation was used for purification.

$\text{Ir}(\text{ppy})_3$  was firstly evaporated on a piece of clear square quartz. Then  $\text{Alq}_3$  ( $\text{Al}(\text{qBr}_2)_3$  or  $\text{Gaq}_3$ ) was sequentially evaporated on the layer of  $\text{Ir}(\text{ppy})_3$ . The thickness of  $\text{Ir}(\text{ppy})_3$  was 120 nm and the thickness of  $\text{Alq}_3$  ( $\text{Al}(\text{qBr}_2)_3$  or  $\text{Gaq}_3$ ) was 30 nm. The annealing for I- $\text{Alq}_3$  was at 370 °C for 8 min. For I- $\text{Al}(\text{qBr}_2)_3$  the temperature was 360 °C for 8 min. For I- $\text{Gaq}_3$  the temperature was 380 °C for 5 min.

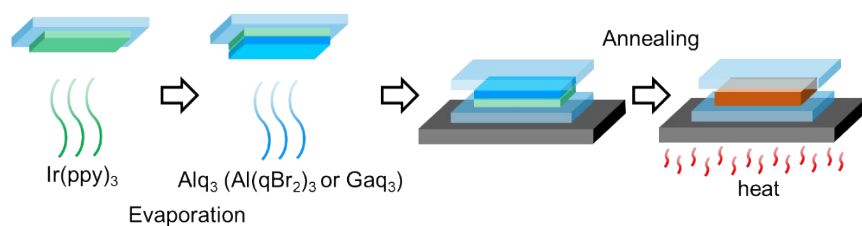

**Figure S1.** The process to fabricate engineered crystals: double film annealing method.

## (2) Observation and spectrum measurement

The observation of morphology was performed using an Olympus fluorescence microscope with UV light source and a Thermo Scientific Prisma E SEM. The photoluminescence spectrums were measured by a Renishaw microscope. The excitation light sources are 405 nm, 532 nm, and 632.8 nm laser. The UV-vis spectrums were measured by a Hitachi UV-vis spectrophotometer using sphere integrating method. The photoluminescence lifetimes of the long wavelength phosphorescence were measured by an Edinburgh spectrophotometer using a  $\mu$ s pulse flash lamp. XRD diffraction spectra were measured by a Bruker D8 Advance instrument.

### **Computational details:**

Geometry optimizations and single point computations in ground state were performed by DFT method. A hybrid functional B3LYP<sup>2-4</sup> was applied with D3 correction<sup>5</sup>, and the basis set was def2-SVP<sup>6-7</sup> and the auxiliary basis is def2/J. The spin-orbital coupling (SOC) matrix elements were calculated by TDA using DKH method. And the basis set was DKH-def2-SVP<sup>8-9</sup> a special version for DKH method (the auxiliary basis is SARC/J<sup>8-9</sup>). To well describe the SOC matrix elements, no effective core potential for Ir was adopted. All the methods above were provided by ORCA 5.0.1<sup>10-11</sup> and the grid size was set as “DEFGRID3”<sup>12</sup>.

The spin-allowed transition dipole moments (TDMs) were computed by Gaussian 16A by TDDFT based on the converged geometries obtained by the computations from ORCA. D3 correction was adopted. The calculation of transition dipole moments between excited states was performed by Multiwfn 3.7<sup>13-17</sup> based on the computational results from Gaussian 16A. Based on the computations of SOC and TDM, the spin-forbidden TDMs (TDM<sub>SFS</sub>) can be calculated, and 30 intermediate states were calculated.

At the current stage of computational chemistry it is almost impossible to build a model for a crystalline lattice confinement matrix starting from first principles, and a set of simplifications is necessary. The purpose of these simplifications is to conserve the most important and representative structure to make the computation possible. The lattice confinement matrix contains a part of periodic structure of the host and a part of non-periodic structure of the guest and the host molecules surrounding it. The non-periodic structure is more important than the periodic structure of the host because the spin-forbidden excitation is activated by a combined effect of both the guest and host. Within the non-periodic structure, photophysical behavior occurring in a two-molecular system is more possible and feasible than in a multi-molecular system. Therefore, the computational model was finally selected by a guest and a host as a dimer system. The conformer searching of the two-molecular system was performed by Crest module in XTB program<sup>18-22</sup>. The conformer searching

depends on the initial geometry sent into the program. In this work, the initial geometries of a dimer were created by joining the two molecules in the direction of  $\pm x$ ,  $\pm y$ , and  $\pm z$  (shown in Figure S1). To avoid calculating conformers of extreme close geometries, e.g., the only difference between two conformers is the rotation of a methyl group, the minimum energy difference between two conformers was set  $0.5 \text{ kcal mol}^{-1}$ . To cover different possible conformers in lattice confinements, as many as five conformers of each of the engineered crystals as shown in Figure S5. And the excitation spectra of all the five conformers were calculated and overlapped to create an excitation spectrum for each engineered crystal as shown in Figure 4. Then the spectra line was broadened using a FWHM of  $500 \text{ cm}^{-1}$ . Both  $\text{Ir(ppy)}_3$  and  $\text{Alq}_3$  ( $\text{Al(qBr}_2)_3$  or  $\text{Gaq}_3$ ) themselves have different conformers. According to the previous references<sup>23-25</sup> and our experimental observation, *fac*- $\text{Ir(ppy)}_3$  and *mer*- $\text{Alq}_3$  were selected.

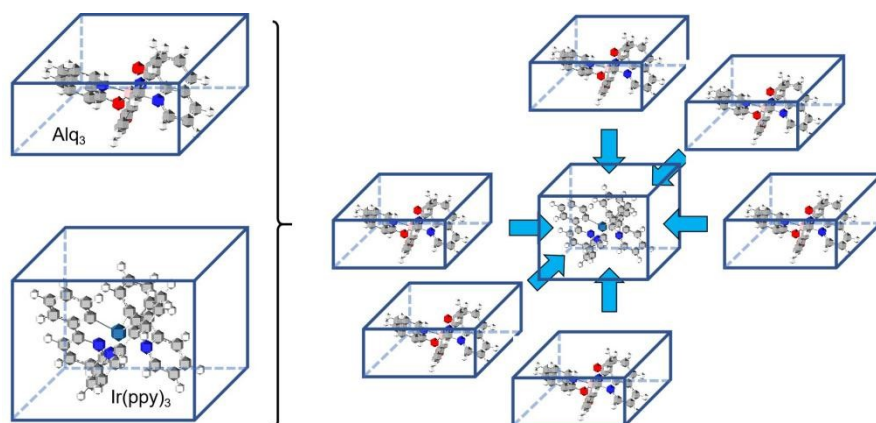

**Figure S2.** The generation of initial geometries for conformer searching. The initial geometries of two-molecule-systems were created by joining the two molecules in the direction of  $\pm x$ ,  $\pm y$ , and  $\pm z$ .

**Supplementary data:**

**Table S1.** The luminescence lifetimes and the proportions at different temperature of the engineered crystals excited at 632.8 nm.

| <b>Ex@633</b>      | <b>Temperature /K</b>                | <b>Lifetimes /<math>\mu</math>s</b> | <b><math>\chi^2</math></b> |      |
|--------------------|--------------------------------------|-------------------------------------|----------------------------|------|
| I-Alq <sub>3</sub> | 77                                   | 11.48                               | 1.10                       |      |
|                    |                                      | 48.38                               |                            |      |
|                    | 127                                  | 12.20                               | 1.08                       |      |
|                    |                                      | 48.35                               |                            |      |
|                    | 177                                  | 13.52                               | 1.01                       |      |
|                    |                                      | 57.68                               |                            |      |
|                    | 298                                  | 21.17                               | 1.10                       |      |
|                    |                                      | 119.79                              |                            |      |
|                    | 350                                  | 25.00                               | 1.17                       |      |
|                    |                                      | 173.31                              |                            |      |
|                    | 400                                  | 30.14                               | 1.12                       |      |
|                    |                                      | 203.05                              |                            |      |
|                    | I-Al(qBr <sub>2</sub> ) <sub>3</sub> | 77                                  | 1.95                       | 1.00 |
|                    |                                      |                                     | 11.13                      |      |
| 127                |                                      | 7.00                                | 1.02                       |      |
|                    |                                      | 18.47                               |                            |      |
| 177                |                                      | 12.25                               | 0.99                       |      |
|                    |                                      | 19.53                               |                            |      |
| 298                |                                      | 4.54                                | 1.01                       |      |
|                    |                                      | 44.99                               |                            |      |
| 350                |                                      | 5.15                                | 1.01                       |      |
|                    |                                      | 51.67                               |                            |      |
| 400                |                                      | 7.75                                | 1.19                       |      |
|                    |                                      | 32.63                               |                            |      |

|     |  | 116.99 |
|-----|--|--------|
|     |  | 4.65   |
| 77  |  | 1.01   |
|     |  | 13.44  |
|     |  | 5.90   |
| 127 |  | 1.02   |
|     |  | 14.65  |
|     |  | 5.94   |
| 177 |  | 1.10   |
|     |  | 16.45  |
|     |  | 7.32   |
| 298 |  | 1.10   |
|     |  | 61.05  |
|     |  | 6.70   |
| 350 |  | 1.19   |
|     |  | 149.69 |
|     |  | 5.34   |
| 400 |  | 1.18   |
|     |  | 155.75 |

I-Gaq<sub>3</sub>

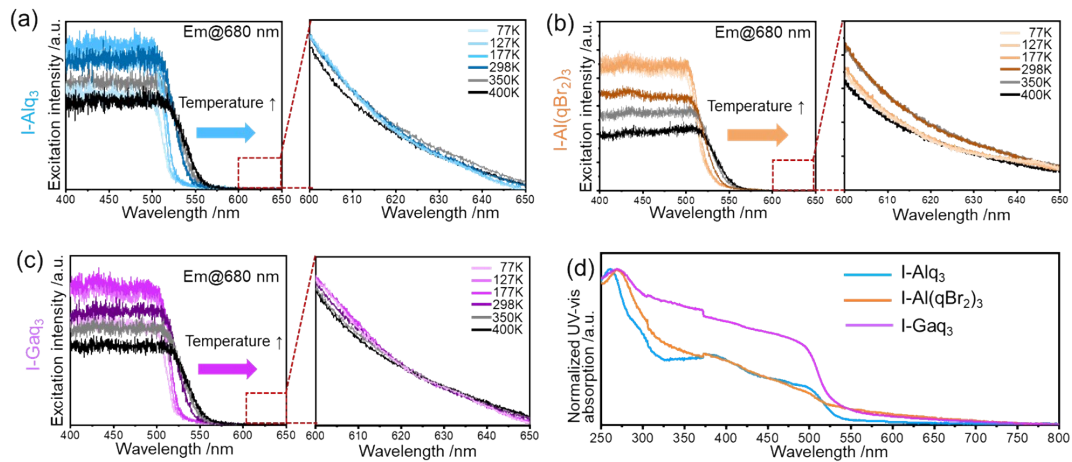

**Figure S3.** The excitation spectra with an emission at 680 nm under different temperatures and the UV-vis absorption spectrum (normalized) under room temperature of the engineered crystals: (a) excitation spectrum of I-Alq<sub>3</sub>, (b) excitation spectrum of I-Al(qBr<sub>2</sub>)<sub>3</sub>, (c) excitation spectrum of I-Gaq<sub>3</sub>, (d) UV-vis spectrum.

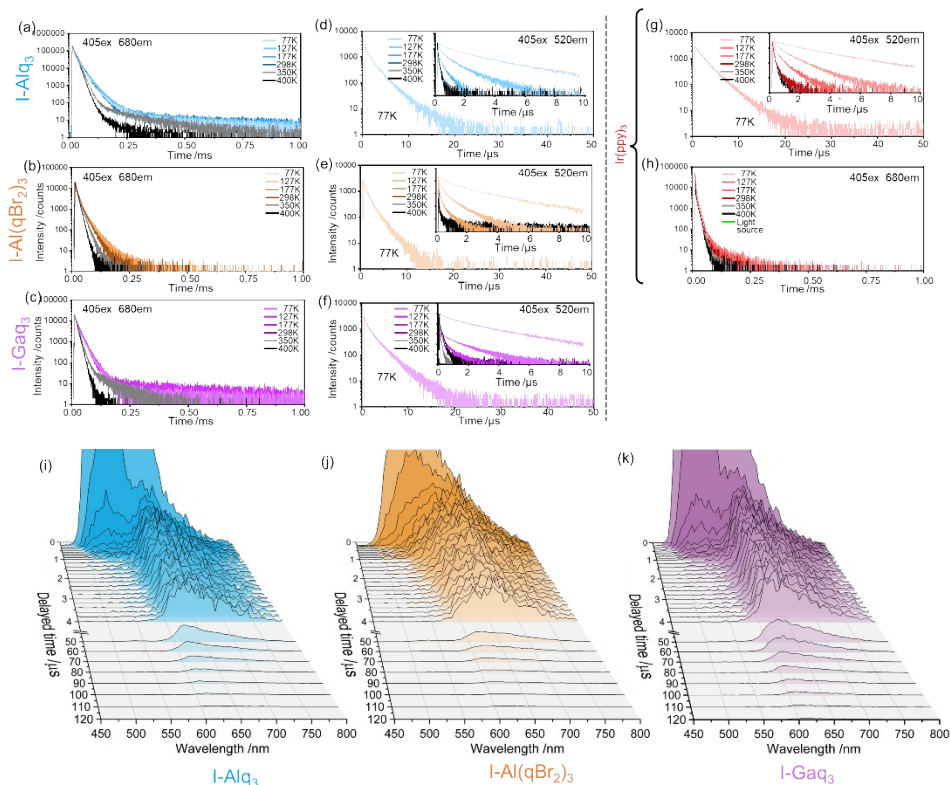

**Figure S4.** The lifetime measurements at 680 nm and 520 nm excited at 405 nm under different temperatures, (a-c) lifetimes of engineered crystals of I-Alq<sub>3</sub>, I-Al(qBr<sub>2</sub>)<sub>3</sub>, and I-Gaq<sub>3</sub> at 680 nm (d-f) lifetimes of I-Alq<sub>3</sub>, I-Al(qBr<sub>2</sub>)<sub>3</sub>, and I-Gaq<sub>3</sub> at 520 nm, (g-h) lifetimes of the crystal of Ir(ppy)<sub>3</sub> at 520 nm and 680 nm, (i-k) the time-delayed emission spectrum of the engineered crystals.

When excited at 405 nm (**Figure S4(a-c)**), the lifetimes of the engineered crystals of I-Alq<sub>3</sub>, I-Al(qBr<sub>2</sub>)<sub>3</sub>, and I-Gaq<sub>3</sub> were all long and they were measured at the range of 1 ms. When the temperature was lowered, there was a trend that these lifetimes were getting longer similar with the trend of Ir(ppy)<sub>3</sub>. Besides, the lifetimes at 520 nm (**Figure S4(d-f)**) were becoming longer when the temperature was lowered same with the lifetime measurements of Ir(ppy)<sub>3</sub>. These were typical radiative transition behaviors at lower temperature. The time-delayed spectra of the engineered crystals measured at room temperature were shown in **Figure S4(i-k)**. The emission at the range from 500 nm to 550nm almost disappeared with in 4 μs and the emission beyond 600 nm lasted for over 100 μs.

In the engineered crystals, both the triplet states of the supermolecule system of guest (e.g. Alq<sub>3</sub>) and the host (Ir(ppy)<sub>3</sub>) and the host itself can phosphoresce and both of the phosphorescence spectra can cover 680 nm. As shown in Figure S4, we measured the emission

at 680 nm for both the engineered crystals (**Figure 4(a-c)**) and the Ir(ppy)<sub>3</sub> (**Figure 4(h)**). They show similar behaviors (the lifetimes become longer) when the temperature is decreased. As we know both the absorptions of the supermolecule system and the Ir(ppy)<sub>3</sub> cover 405 nm. Thus, the emission excited at 405 nm is a mixture of these two species and it seems more affected by the Ir(ppy)<sub>3</sub>. However, for the excitation at 632.8 nm, this wavelength already exceed the absorption range of Ir(ppy)<sub>3</sub>. Therefore, the species that excited by 632.8 nm is only the supermolecule. The emission at 680 nm excited at 632.8 nm is purely contributed by the supermolecule.

Different from the emission of the single components at around 520 nm as shown in **Figure S4(d-h)**, the emission of the engineered crystals at 680 nm shows dual lifetimes (as shown in **Figure S3(a-c)**) instead of one single exponential. The dual lifetimes may reflect more complicated photophysical processes and exciton transfers between the two components of the engineered crystals. The quenching of triplet excitons through the non-radiative decay of Alq<sub>3</sub> (for instance) can be a reason for this dual lifetime. Triplet-triplet annihilation may also cause the quenching of triplet excitons resulting in dual lifetime, However, corresponding experimental phenomenon was not found.

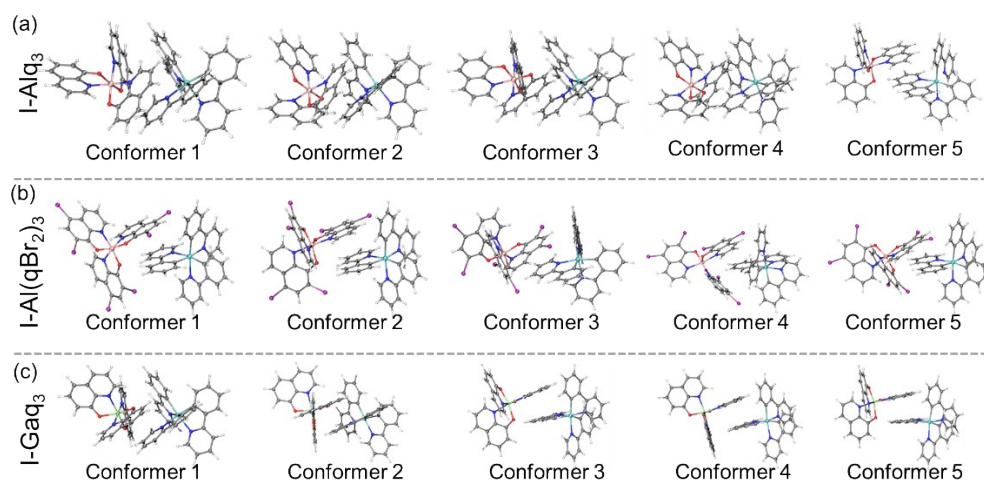

**Figure S5.** The geometries of the searched conformers for each engineered crystal (the energy order is Conformer 1 < Conformer 2 < Conformer 3 < Conformer 4 < Conformer 5).

In **Figure 4(a-c)** the excitations of  $S_0 \rightarrow T_1$  at the longest wavelength were contributed by Conformer 3 of I-Alq<sub>3</sub>, Conformer 1 of I-Al(qBr<sub>2</sub>)<sub>3</sub>, and Conformer 1 of I-Gaq<sub>3</sub>. All the coordinates of these conformers are listed at the end this file.

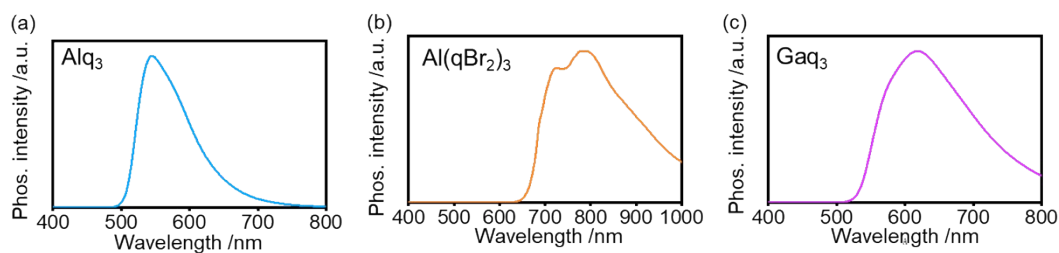

**Figure S6.** The phosphorescence spectra of Alq<sub>3</sub>, Al(qBr<sub>2</sub>)<sub>3</sub>, and Gaq<sub>3</sub>.

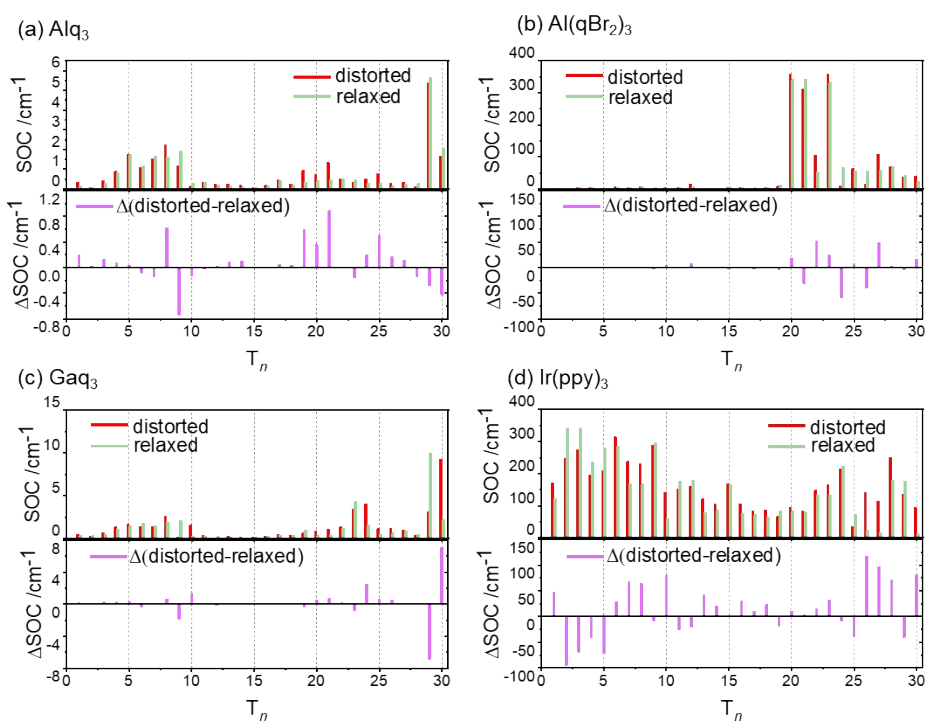

**Figure S7.** The SOC<sub>s</sub> of the distorted and relaxed geometries.

The improvements of SOC<sub>s</sub> via distortion of Alq<sub>3</sub> and Irppy<sub>3</sub> were more obvious than Al(qBr<sub>2</sub>)<sub>3</sub> and Gaq<sub>3</sub>. In this case the distorted geometries were isolated from the supermolecules shown in Figure 4.



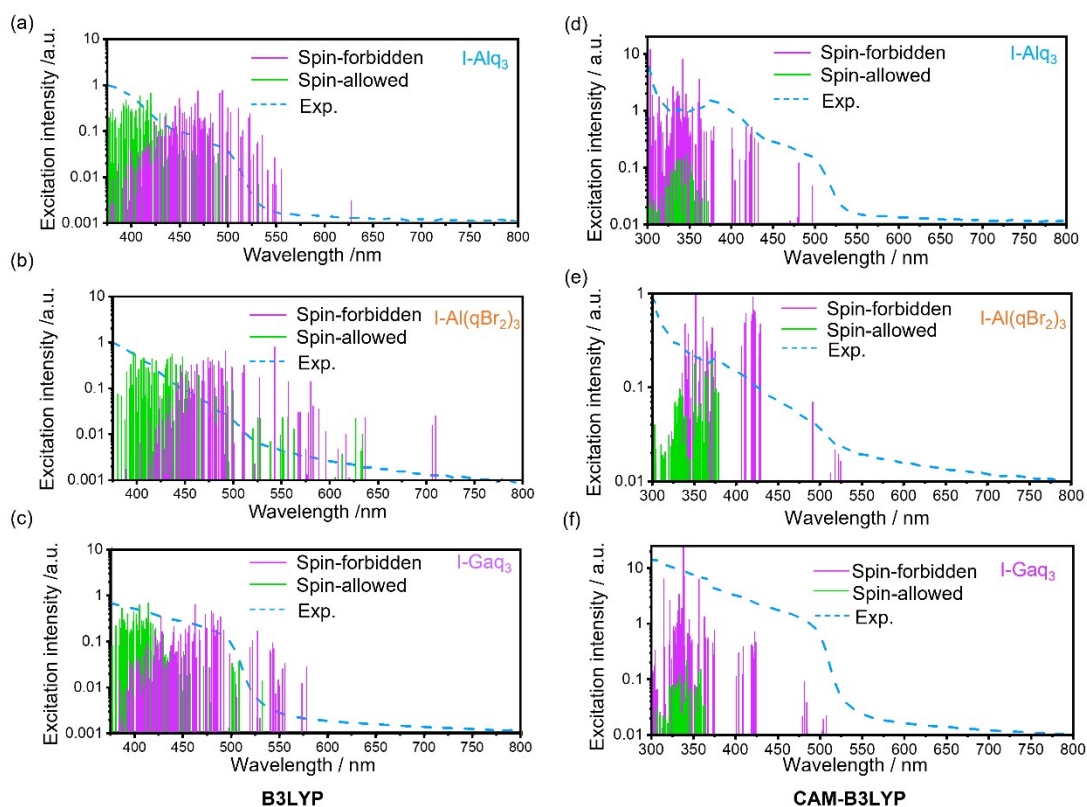

**Figure S8.** The absorption spectra calculated at B3LYP def2-SVP and CAM-B3LYP/def2-SVP level.

B3LYP functional, used in our studies, is widely accepted for computing molecular properties. However, it might underestimate intermolecular coupling. To check the latter assumption, we computed the spectra of the dimers using CAM-B3LYP, which accounts for long-range corrections. Figure S8 compares the absorption spectra computed with B3LYP and CAM-B3LYP. Both spectra show a similar pattern with long-wavelength triplet states. This is consistent with our analysis of NTOs showing that intermolecular charge transfer does not play a sufficient role between the initial and final states in the excitation mechanism. Still, the spectra computed with CAM-B3LYP experience a systematic blue shift of the singlet band as compared to experiments and need to be calibrated.

**Table S2.** The TDMs of Ir(ppy)<sub>3</sub> calculated at the level of B3LYP/def2-SVP.

| State | $\mu_x/\text{a.u.}$ | $\mu_y/\text{a.u.}$ | $\mu_z/\text{a.u.}$ | u/debye  |
|-------|---------------------|---------------------|---------------------|----------|
| 1     | -0.01009            | 0.03685             | 0.27894             | 0.715698 |
| 2     | 0.14969             | -0.06882            | 0.01435             | 0.420392 |
| 3     | -0.06827            | -0.14787            | 0.01861             | 0.416686 |
| 4     | 0.51718             | 0.22905             | -0.00472            | 1.437905 |

|    |          |          |          |          |
|----|----------|----------|----------|----------|
| 5  | 0.2284   | -0.51273 | 0.08068  | 1.441496 |
| 6  | -0.0188  | 0.01704  | 0.17334  | 0.445322 |
| 7  | -0.0024  | 0.0186   | 0.14463  | 0.370731 |
| 8  | -0.43064 | 0.79428  | -0.12972 | 2.320277 |
| 9  | -0.80479 | -0.43179 | 0.02431  | 2.322448 |
| 10 | 0.16208  | -0.21446 | 0.03851  | 0.690283 |
| 11 | 0.2177   | 0.16048  | -0.0102  | 0.687986 |
| 12 | 0.0368   | -0.10905 | -0.7364  | 1.894651 |
| 13 | -0.04012 | 0.80067  | -0.11901 | 2.060197 |
| 14 | -0.80912 | -0.04204 | -0.03294 | 2.061263 |
| 15 | -0.00656 | 0.02657  | 0.07962  | 0.214042 |
| 16 | 0.27299  | -0.32869 | 0.05675  | 1.095658 |
| 17 | 0.33645  | 0.27619  | -0.02118 | 1.107828 |
| 18 | -0.02492 | 0.06944  | 0.5305   | 1.361525 |
| 19 | 0.0583   | 0.01694  | -0.00073 | 0.154415 |
| 20 | -0.01709 | 0.05704  | -0.00943 | 0.153154 |
| 21 | 0.004    | -0.00216 | -0.02529 | 0.065305 |
| 22 | 0.00671  | -0.01931 | -0.10806 | 0.279504 |
| 23 | -0.48644 | -0.1668  | 0.00151  | 1.307191 |
| 24 | 0.1621   | -0.48132 | 0.07521  | 1.305113 |
| 25 | -0.44923 | -0.05576 | -0.01964 | 1.151781 |
| 26 | -0.05618 | 0.44441  | -0.06891 | 1.15209  |
| 27 | -0.06628 | 0.19327  | 1.37275  | 3.527954 |
| 28 | -0.00072 | 0.0286   | 0.2361   | 0.604547 |
| 29 | 0.13715  | -0.46572 | 0.06675  | 1.245736 |
| 30 | -0.46869 | -0.14123 | 0.0019   | 1.244334 |

**Table S3.** The SOCs of Ir(ppy)<sub>3</sub> calculated at the level of B3LYP/def2-SVP.

| Roots          |                | <T <sub>n</sub>  HSO S <sub>n</sub> > elements (Rm, Im) /cm <sup>-1</sup> |         |         |        |         |         | SOC/cm <sup>-1</sup> |
|----------------|----------------|---------------------------------------------------------------------------|---------|---------|--------|---------|---------|----------------------|
| T <sub>n</sub> | S <sub>n</sub> | Ms=0                                                                      | Ms=0    | Ms=1    | Ms=-1  | Ms=1    | Ms=1    |                      |
| 1              | 0              | 0.00                                                                      | -211.84 | 26.94   | 8.77   | 26.94   | -8.77   | 124.4743             |
| 1              | 1              | 0.00                                                                      | 1.22    | 3.83    | 0.79   | 3.83    | -0.79   | 3.2698               |
| 1              | 2              | 0.00                                                                      | 30.52   | 117.93  | 109.49 | 117.93  | -109.49 | 132.5677             |
| 1              | 3              | 0.00                                                                      | 12.92   | 110.44  | -      | 110.44  | 122.30  | 134.7535             |
|                |                |                                                                           |         |         | 122.30 |         |         |                      |
| 1              | 4              | 0.00                                                                      | -139.06 | -571.35 | -      | -571.35 | 385.89  | 568.6362             |
|                |                |                                                                           |         |         | 385.89 |         |         |                      |
| 1              | 5              | 0.00                                                                      | -41.54  | -379.36 | 579.08 | -379.36 | -579.08 | 565.7505             |
| 1              | 6              | 0.00                                                                      | -174.38 | 21.56   | 19.30  | 21.56   | -19.30  | 103.4135             |
| 1              | 7              | 0.00                                                                      | -104.38 | 11.78   | 6.52   | 11.78   | -6.52   | 61.2583              |
| 1              | 8              | 0.00                                                                      | 14.44   | 154.37  | -      | 154.37  | 236.73  | 230.9047             |
|                |                |                                                                           |         |         | 236.73 |         |         |                      |

|   |    |      |         |         |        |         |         |          |
|---|----|------|---------|---------|--------|---------|---------|----------|
| 1 | 9  | 0.00 | 53.23   | 233.94  | 141.38 | 233.94  | -141.38 | 225.2894 |
| 1 | 10 | 0.00 | -3.40   | -35.49  | 49.94  | -35.49  | -49.94  | 50.0621  |
| 1 | 11 | 0.00 | -11.45  | -48.28  | -34.34 | -48.28  | 34.34   | 48.8245  |
| 1 | 12 | 0.00 | -132.23 | 15.85   | 7.67   | 15.85   | -7.67   | 77.6850  |
| 1 | 13 | 0.00 | -1.52   | 17.74   | -62.09 | 17.74   | 62.09   | 52.7322  |
| 1 | 14 | 0.00 | 12.55   | 61.86   | 15.51  | 61.86   | -15.51  | 52.5736  |
| 1 | 15 | 0.00 | -23.66  | 2.23    | 0.06   | 2.23    | -0.06   | 13.7810  |
| 1 | 16 | 0.00 | -0.92   | -9.59   | 27.25  | -9.59   | -27.25  | 23.5931  |
| 1 | 17 | 0.00 | -5.63   | -26.53  | -8.95  | -26.53  | 8.95    | 23.0910  |
| 1 | 18 | 0.00 | -12.94  | -0.09   | -0.43  | -0.09   | 0.43    | 7.4795   |
| 1 | 19 | 0.00 | -22.41  | -126.91 | 47.65  | -126.91 | -47.65  | 111.4384 |
| 1 | 20 | 0.00 | -16.59  | -47.62  | -      | -47.62  | 126.89  | 111.0746 |
|   |    |      |         |         | 126.89 |         |         |          |
| 1 | 21 | 0.00 | -59.21  | 7.56    | 2.67   | 7.56    | -2.67   | 34.8061  |
| 1 | 22 | 0.00 | -35.98  | 2.51    | 1.68   | 2.51    | -1.68   | 20.9189  |
| 1 | 23 | 0.00 | -14.69  | -49.28  | -77.09 | -49.28  | 77.09   | 75.1855  |
| 1 | 24 | 0.00 | 12.24   | 75.50   | -51.80 | 75.50   | 51.80   | 75.0928  |
| 1 | 25 | 0.00 | 6.78    | 25.75   | 30.52  | 25.75   | -30.52  | 32.8382  |
| 1 | 26 | 0.00 | 4.31    | 30.01   | -27.43 | 30.01   | 27.43   | 33.2896  |
| 1 | 27 | 0.00 | -3.94   | 1.51    | 0.37   | 1.51    | -0.37   | 2.6050   |
| 1 | 28 | 0.00 | -19.20  | -0.74   | 2.23   | -0.74   | -2.23   | 11.2499  |
| 1 | 29 | 0.00 | 19.67   | 72.00   | 80.48  | 72.00   | -80.48  | 88.8988  |
| 1 | 30 | 0.00 | 11.53   | 81.86   | -72.57 | 81.86   | 72.57   | 89.5691  |
| 2 | 0  | 0.00 | 73.69   | 394.59  | -      | 394.59  | 107.82  | 336.6913 |
|   |    |      |         |         | 107.82 |         |         |          |
| 2 | 1  | 0.00 | 32.48   | 205.04  | -      | 205.04  | 134.37  | 201.0376 |
|   |    |      |         |         | 134.37 |         |         |          |
| 2 | 2  | 0.00 | 34.05   | -141.33 | -      | -141.33 | 110.57  | 147.8278 |
|   |    |      |         |         | 110.57 |         |         |          |
| 2 | 3  | 0.00 | -16.38  | 109.07  | -      | 109.07  | 129.86  | 138.7901 |
|   |    |      |         |         | 129.86 |         |         |          |
| 2 | 4  | 0.00 | 203.81  | 103.46  | -      | 103.46  | 166.62  | 198.7217 |
|   |    |      |         |         | 166.62 |         |         |          |
| 2 | 5  | 0.00 | -151.18 | 196.43  | 117.02 | 196.43  | -117.02 | 206.0843 |
| 2 | 6  | 0.00 | -1.64   | -161.92 | 508.23 | -161.92 | -508.23 | 435.5205 |
| 2 | 7  | 0.00 | 65.79   | 281.95  | 108.78 | 281.95  | -108.78 | 249.6572 |
| 2 | 8  | 0.00 | -69.75  | 413.15  | 227.84 | 413.15  | -227.84 | 387.3298 |
| 2 | 9  | 0.00 | -124.36 | 230.71  | -      | 230.71  | 399.80  | 383.6664 |
|   |    |      |         |         | 399.80 |         |         |          |
| 2 | 10 | 0.00 | -12.10  | -40.82  | 16.19  | -40.82  | -16.19  | 36.5294  |
| 2 | 11 | 0.00 | -15.88  | 16.96   | 42.22  | 16.96   | -42.22  | 38.2645  |
| 2 | 12 | 0.00 | 68.26   | 313.85  | 63.58  | 313.85  | -63.58  | 264.4163 |
| 2 | 13 | 0.00 | -28.31  | 43.97   | 45.33  | 43.97   | -45.33  | 54.0919  |
| 2 | 14 | 0.00 | -10.74  | 44.36   | -38.70 | 44.36   | 38.70   | 48.4642  |

|   |    |      |         |         |        |         |         |          |
|---|----|------|---------|---------|--------|---------|---------|----------|
| 2 | 15 | 0.00 | 3.26    | 12.30   | 7.67   | 12.30   | -7.67   | 11.9842  |
| 2 | 16 | 0.00 | -18.31  | -24.90  | 0.62   | -24.90  | -0.62   | 22.9205  |
| 2 | 17 | 0.00 | -9.15   | 0.39    | 28.34  | 0.39    | -28.34  | 23.7370  |
| 2 | 18 | 0.00 | -27.54  | -138.82 | -4.87  | -138.82 | 4.87    | 114.5249 |
| 2 | 19 | 0.00 | 20.91   | -7.81   | -45.94 | -7.81   | 45.94   | 39.9174  |
| 2 | 20 | 0.00 | 50.54   | -50.12  | 7.53   | -50.12  | -7.53   | 50.6350  |
| 2 | 21 | 0.00 | 22.52   | 98.94   | 32.75  | 98.94   | -32.75  | 86.0824  |
| 2 | 22 | 0.00 | -3.21   | -55.30  | 117.84 | -55.30  | -117.84 | 106.2999 |
| 2 | 23 | 0.00 | 23.90   | 101.01  | -23.34 | 101.01  | 23.34   | 85.7647  |
| 2 | 24 | 0.00 | -8.96   | -23.61  | -      | -23.61  | 101.06  | 84.8948  |
|   |    |      |         |         | 101.06 |         |         |          |
| 2 | 25 | 0.00 | -11.71  | -27.83  | -9.51  | -27.83  | 9.51    | 24.9468  |
| 2 | 26 | 0.00 | -7.24   | 10.49   | -27.63 | 10.49   | 27.63   | 24.4903  |
| 2 | 27 | 0.00 | 10.00   | 50.83   | -1.03  | 50.83   | 1.03    | 41.9106  |
| 2 | 28 | 0.00 | -31.60  | -147.32 | -25.36 | -147.32 | 25.36   | 123.4115 |
| 2 | 29 | 0.00 | -23.26  | 56.39   | -47.27 | 56.39   | 47.27   | 61.5619  |
| 2 | 30 | 0.00 | 26.36   | 42.59   | 52.14  | 42.59   | -52.14  | 57.0375  |
| 3 | 0  | 0.00 | -48.05  | -104.71 | -      | -104.71 | 397.68  | 336.9154 |
|   |    |      |         |         | 397.68 |         |         |          |
| 3 | 1  | 0.00 | -38.90  | -131.25 | -      | -131.25 | 207.56  | 201.7661 |
|   |    |      |         |         | 207.56 |         |         |          |
| 3 | 2  | 0.00 | 42.26   | 106.86  | -      | 106.86  | 130.96  | 140.1488 |
|   |    |      |         |         | 130.96 |         |         |          |
| 3 | 3  | 0.00 | 100.36  | 126.68  | 103.78 | 126.68  | -103.78 | 145.7262 |
| 3 | 4  | 0.00 | 235.95  | 159.40  | 114.14 | 159.40  | -114.14 | 210.1944 |
| 3 | 5  | 0.00 | 177.66  | -140.70 | 171.56 | -140.70 | -171.56 | 208.1840 |
| 3 | 6  | 0.00 | 103.00  | 497.58  | 157.44 | 497.58  | -157.44 | 430.2540 |
| 3 | 7  | 0.00 | 3.00    | 111.50  | -      | 111.50  | 291.44  | 254.7862 |
|   |    |      |         |         | 291.44 |         |         |          |
| 3 | 8  | 0.00 | -160.16 | -203.52 | 402.77 | -203.52 | -402.77 | 379.8857 |
| 3 | 9  | 0.00 | 254.35  | 382.02  | 214.46 | 382.02  | -214.46 | 386.6776 |
| 3 | 10 | 0.00 | -27.49  | -14.47  | -39.83 | -14.47  | 39.83   | 38.0671  |
| 3 | 11 | 0.00 | -2.27   | -42.15  | 17.44  | -42.15  | -17.44  | 37.2680  |
| 3 | 12 | 0.00 | -7.89   | 66.13   | -      | 66.13   | 317.77  | 265.0561 |
|   |    |      |         |         | 317.77 |         |         |          |
| 3 | 13 | 0.00 | -22.92  | -40.66  | 37.72  | -40.66  | -37.72  | 47.1784  |
| 3 | 14 | 0.00 | 49.29   | 35.14   | 41.43  | 35.14   | -41.43  | 52.7005  |
| 3 | 15 | 0.00 | 1.00    | 6.57    | -10.74 | 6.57    | 10.74   | 10.2960  |
| 3 | 16 | 0.00 | -12.36  | 1.31    | -28.71 | 1.31    | 28.71   | 24.5271  |
| 3 | 17 | 0.00 | 7.58    | -29.51  | 0.82   | -29.51  | -0.82   | 24.4982  |
| 3 | 18 | 0.00 | 7.40    | -5.54   | 139.66 | -5.54   | -139.66 | 114.2015 |
| 3 | 19 | 0.00 | 66.82   | 38.35   | -9.21  | 38.35   | 9.21    | 50.2527  |
| 3 | 20 | 0.00 | -29.03  | -4.57   | -44.43 | -4.57   | 44.43   | 40.1354  |
| 3 | 21 | 0.00 | -0.97   | 32.71   | -      | 32.71   | 101.50  | 87.0734  |

|   |    |      |         |        |        |        |         |          |
|---|----|------|---------|--------|--------|--------|---------|----------|
|   |    |      |         |        | 101.50 |        |         |          |
| 3 | 22 | 0.00 | 26.53   | 118.65 | 55.67  | 118.65 | -55.67  | 108.1015 |
| 3 | 23 | 0.00 | 12.88   | 22.40  | 99.20  | 22.40  | -99.20  | 83.3680  |
| 3 | 24 | 0.00 | 12.63   | 100.22 | -24.30 | 100.22 | 24.30   | 84.5155  |
| 3 | 25 | 0.00 | 7.95    | 9.51   | -27.55 | 9.51   | 27.55   | 24.2356  |
| 3 | 26 | 0.00 | 0.75    | 28.32  | 10.18  | 28.32  | -10.18  | 24.5755  |
| 3 | 27 | 0.00 | -3.42   | -0.57  | -51.34 | -0.57  | 51.34   | 41.9680  |
| 3 | 28 | 0.00 | 6.01    | -23.12 | 149.47 | -23.12 | -149.47 | 123.5418 |
| 3 | 29 | 0.00 | -1.84   | 48.91  | 50.52  | 48.91  | -50.52  | 57.4233  |
| 3 | 30 | 0.00 | -37.60  | -48.33 | 49.51  | -48.33 | -49.51  | 60.5195  |
| 4 | 0  | 0.00 | -397.56 | 47.06  | 6.60   | 47.06  | -6.60   | 232.7877 |
| 4 | 1  | 0.00 | -23.57  | -8.24  | 21.20  | -8.24  | -21.20  | 23.0233  |
| 4 | 2  | 0.00 | 65.93   | 142.97 | 606.56 | 142.97 | -606.56 | 510.2475 |
| 4 | 3  | 0.00 | 104.56  | 584.48 | -      | 584.48 | 158.99  | 498.2376 |
|   |    |      |         |        | 158.99 |        |         |          |
| 4 | 4  | 0.00 | 20.99   | 252.76 | 117.98 | 252.76 | -117.98 | 228.0748 |
| 4 | 5  | 0.00 | 12.57   | 120.33 | -      | 120.33 | 241.95  | 220.7534 |
|   |    |      |         |        | 241.95 |        |         |          |
| 4 | 6  | 0.00 | -713.72 | 69.99  | 26.18  | 69.99  | -26.18  | 416.5590 |
| 4 | 7  | 0.00 | -116.83 | 17.64  | 3.54   | 17.64  | -3.54   | 69.0330  |
| 4 | 8  | 0.00 | -0.72   | -50.09 | 94.71  | -50.09 | -94.71  | 87.4805  |
| 4 | 9  | 0.00 | -24.42  | -76.35 | -55.37 | -76.35 | 55.37   | 78.2872  |
| 4 | 10 | 0.00 | 23.05   | 106.69 | 26.41  | 106.69 | -26.41  | 90.7226  |
| 4 | 11 | 0.00 | -0.20   | -28.47 | 108.53 | -28.47 | -108.53 | 91.6127  |
| 4 | 12 | 0.00 | 20.84   | 3.08   | -5.03  | 3.08   | 5.03    | 12.9599  |
| 4 | 13 | 0.00 | 5.15    | 8.76   | 61.35  | 8.76   | -61.35  | 50.6874  |
| 4 | 14 | 0.00 | -10.47  | -56.95 | 7.94   | -56.95 | -7.94   | 47.3368  |
| 4 | 15 | 0.00 | 24.39   | -1.52  | -1.70  | -1.52  | 1.70    | 14.2041  |
| 4 | 16 | 0.00 | 2.20    | 17.87  | -25.92 | 17.87  | 25.92   | 25.7372  |
| 4 | 17 | 0.00 | 5.13    | 22.74  | 15.44  | 22.74  | -15.44  | 22.6371  |
| 4 | 18 | 0.00 | -47.52  | 0.05   | 4.03   | 0.05   | -4.03   | 27.6323  |
| 4 | 19 | 0.00 | 0.40    | 29.18  | -11.16 | 29.18  | 11.16   | 25.5094  |
| 4 | 20 | 0.00 | 1.75    | 10.02  | 26.68  | 10.02  | -26.68  | 23.2917  |
| 4 | 21 | 0.00 | -78.99  | 9.17   | 3.33   | 9.17   | -3.33   | 46.2953  |
| 4 | 22 | 0.00 | -137.09 | 15.73  | 3.48   | 15.73  | -3.48   | 80.2346  |
| 4 | 23 | 0.00 | 2.49    | 32.20  | -34.77 | 32.20  | 34.77   | 38.7203  |
| 4 | 24 | 0.00 | 8.22    | 33.37  | 30.34  | 33.37  | -30.34  | 37.1291  |
| 4 | 25 | 0.00 | 3.42    | -4.63  | 78.50  | -4.63  | -78.50  | 64.2367  |
| 4 | 26 | 0.00 | 16.15   | 76.66  | 4.27   | 76.66  | -4.27   | 63.3793  |
| 4 | 27 | 0.00 | 29.52   | -2.67  | -1.26  | -2.67  | 1.26    | 17.2130  |
| 4 | 28 | 0.00 | -42.55  | 10.41  | -2.49  | 10.41  | 2.49    | 26.0745  |
| 4 | 29 | 0.00 | 5.85    | 11.68  | 24.20  | 11.68  | -24.20  | 22.1987  |
| 4 | 30 | 0.00 | 4.80    | 23.77  | -13.90 | 23.77  | 13.90   | 22.6531  |
| 5 | 0  | 0.00 | -3.73   | 37.41  | -      | 37.41  | 342.01  | 280.9238 |

|   |    |      |         |         |        |         |         |          |
|---|----|------|---------|---------|--------|---------|---------|----------|
|   |    |      |         |         | 342.01 |         |         |          |
| 5 | 1  | 0.00 | 23.05   | -80.74  | 613.72 | -80.74  | -613.72 | 505.5933 |
| 5 | 2  | 0.00 | -70.88  | -350.95 | 95.45  | -350.95 | -95.45  | 299.7650 |
| 5 | 3  | 0.00 | -57.53  | -126.36 | -      | -126.36 | 345.85  | 302.4720 |
|   |    |      |         |         | 345.85 |         |         |          |
| 5 | 4  | 0.00 | -633.54 | 211.77  | 71.81  | 211.77  | -71.81  | 408.8110 |
| 5 | 5  | 0.00 | -282.56 | -29.69  | 164.42 | -29.69  | -164.42 | 212.6586 |
| 5 | 6  | 0.00 | 90.63   | 272.39  | 87.43  | 272.39  | -87.43  | 239.3703 |
| 5 | 7  | 0.00 | 20.41   | 120.12  | -      | 120.12  | 119.57  | 138.8862 |
|   |    |      |         |         | 119.57 |         |         |          |
| 5 | 8  | 0.00 | -88.78  | -80.68  | 258.37 | -80.68  | -258.37 | 226.8704 |
| 5 | 9  | 0.00 | -208.80 | 284.25  | 100.73 | 284.25  | -100.73 | 274.1573 |
| 5 | 10 | 0.00 | -9.91   | 6.29    | -29.09 | 6.29    | 29.09   | 24.9653  |
| 5 | 11 | 0.00 | -46.86  | -24.99  | -8.38  | -24.99  | 8.38    | 34.5703  |
| 5 | 12 | 0.00 | -6.79   | 35.83   | -      | 35.83   | 205.27  | 170.1815 |
|   |    |      |         |         | 205.27 |         |         |          |
| 5 | 13 | 0.00 | -29.97  | -14.52  | 56.73  | -14.52  | -56.73  | 50.8476  |
| 5 | 14 | 0.00 | 23.95   | 57.87   | 16.04  | 57.87   | -16.04  | 50.9445  |
| 5 | 15 | 0.00 | -6.93   | -10.09  | -75.32 | -10.09  | 75.32   | 62.1768  |
| 5 | 16 | 0.00 | 1.92    | 65.86   | -22.00 | 65.86   | 22.00   | 56.7062  |
| 5 | 17 | 0.00 | 20.47   | -23.58  | -64.85 | -23.58  | 64.85   | 57.5676  |
| 5 | 18 | 0.00 | -2.16   | -64.95  | 149.84 | -64.95  | -149.84 | 133.3488 |
| 5 | 19 | 0.00 | -120.92 | 50.65   | 11.73  | 50.65   | -11.73  | 81.7061  |
| 5 | 20 | 0.00 | 18.39   | 5.49    | -40.52 | 5.49    | 40.52   | 35.0343  |
| 5 | 21 | 0.00 | 9.39    | 36.31   | -15.93 | 36.31   | 15.93   | 32.8255  |
| 5 | 22 | 0.00 | 9.45    | 47.37   | -47.85 | 47.37   | 47.85   | 55.2461  |
| 5 | 23 | 0.00 | -77.68  | 50.30   | 9.72   | 50.30   | -9.72   | 61.3279  |
| 5 | 24 | 0.00 | -26.10  | 7.12    | -42.62 | 7.12    | 42.62   | 38.3646  |
| 5 | 25 | 0.00 | -1.17   | -10.17  | 17.10  | -10.17  | -17.10  | 16.2588  |
| 5 | 26 | 0.00 | -0.26   | -21.05  | -10.47 | -21.05  | 10.47   | 19.1965  |
| 5 | 27 | 0.00 | -5.31   | -16.82  | -22.70 | -16.82  | 22.70   | 23.2709  |
| 5 | 28 | 0.00 | 9.53    | 99.25   | -      | 99.25   | 148.88  | 146.1990 |
|   |    |      |         |         | 148.88 |         |         |          |
| 5 | 29 | 0.00 | -11.65  | -6.15   | -16.41 | -6.15   | 16.41   | 15.8108  |
| 5 | 30 | 0.00 | 51.94   | 15.05   | -9.31  | 15.05   | 9.31    | 33.2872  |
| 6 | 0  | 0.00 | -75.96  | -338.72 | -36.06 | -338.72 | 36.06   | 281.5629 |
| 6 | 1  | 0.00 | 124.04  | 608.34  | 75.27  | 608.34  | -75.27  | 505.5928 |
| 6 | 2  | 0.00 | -32.26  | -112.78 | -      | -112.78 | 340.25  | 293.2686 |
|   |    |      |         |         | 340.25 |         |         |          |
| 6 | 3  | 0.00 | 55.62   | 358.69  | -      | 358.69  | 115.34  | 309.3096 |
|   |    |      |         |         | 115.34 |         |         |          |
| 6 | 4  | 0.00 | 281.23  | -74.85  | 137.59 | -74.85  | -137.59 | 206.6861 |
| 6 | 5  | 0.00 | -699.37 | -81.93  | -35.56 | -81.93  | 35.56   | 410.3139 |
| 6 | 6  | 0.00 | -19.15  | 92.77   | -      | 92.77   | 280.92  | 241.8066 |

|   |    |      |         |         |        |         |         |          |
|---|----|------|---------|---------|--------|---------|---------|----------|
|   |    |      |         |         | 280.92 |         |         |          |
| 6 | 7  | 0.00 | -28.88  | -113.61 | -      | -113.61 | 120.69  | 136.3582 |
|   |    |      |         |         | 120.69 |         |         |          |
| 6 | 8  | 0.00 | -319.56 | -232.02 | -81.58 | -232.02 | 81.58   | 272.6999 |
| 6 | 9  | 0.00 | 86.62   | -100.74 | 255.66 | -100.74 | -255.66 | 229.8726 |
| 6 | 10 | 0.00 | -34.36  | 35.49   | 9.68   | 35.49   | -9.68   | 35.9958  |
| 6 | 11 | 0.00 | 9.44    | 7.48    | -27.40 | 7.48    | 27.40   | 23.8225  |
| 6 | 12 | 0.00 | -40.99  | -201.86 | -35.35 | -201.86 | 35.35   | 168.9915 |
| 6 | 13 | 0.00 | -0.59   | -59.82  | -16.30 | -59.82  | 16.30   | 50.6247  |
| 6 | 14 | 0.00 | 30.67   | -21.03  | 57.17  | -21.03  | -57.17  | 52.7952  |
| 6 | 15 | 0.00 | -14.11  | -73.82  | 6.63   | -73.82  | -6.63   | 61.0622  |
| 6 | 16 | 0.00 | 36.38   | 14.38   | 64.18  | 14.38   | -64.18  | 57.6634  |
| 6 | 17 | 0.00 | 21.01   | 66.73   | -20.29 | 66.73   | 20.29   | 58.2253  |
| 6 | 18 | 0.00 | 32.52   | 148.13  | 65.88  | 148.13  | -65.88  | 133.6948 |
| 6 | 19 | 0.00 | 20.49   | -9.11   | 37.64  | -9.11   | -37.64  | 33.7607  |
| 6 | 20 | 0.00 | 137.10  | 25.85   | 3.84   | 25.85   | -3.84   | 81.9804  |
| 6 | 21 | 0.00 | -5.94   | -14.58  | -37.65 | -14.58  | 37.65   | 33.1435  |
| 6 | 22 | 0.00 | -14.81  | -46.46  | -47.58 | -46.46  | 47.58   | 54.9670  |
| 6 | 23 | 0.00 | -22.15  | -3.47   | 43.48  | -3.47   | -43.48  | 37.8406  |
| 6 | 24 | 0.00 | 95.69   | 35.38   | 4.53   | 35.38   | -4.53   | 62.4529  |
| 6 | 25 | 0.00 | -9.69   | -18.46  | -9.20  | -18.46  | 9.20    | 17.7456  |
| 6 | 26 | 0.00 | 1.09    | 12.15   | -18.32 | 12.15   | 18.32   | 17.9599  |
| 6 | 27 | 0.00 | -2.75   | -22.96  | 17.05  | -22.96  | -17.05  | 23.4043  |
| 6 | 28 | 0.00 | -38.19  | -146.30 | -99.65 | -146.30 | 99.65   | 146.2032 |
| 6 | 29 | 0.00 | -44.38  | 25.44   | -1.39  | 25.44   | 1.39    | 33.0042  |
| 6 | 30 | 0.00 | -7.19   | 3.08    | 17.71  | 3.08    | -17.71  | 15.2529  |
| 7 | 0  | 0.00 | -21.91  | -171.68 | 116.10 | -171.68 | -116.10 | 169.6924 |
| 7 | 1  | 0.00 | -109.96 | -526.35 | -85.66 | -526.35 | 85.66   | 440.0209 |
| 7 | 2  | 0.00 | -114.71 | -313.64 | -      | -313.64 | 370.88  | 402.0789 |
|   |    |      |         |         | 370.88 |         |         |          |
| 7 | 3  | 0.00 | 58.79   | 376.07  | -      | 376.07  | 315.26  | 402.1158 |
|   |    |      |         |         | 315.26 |         |         |          |
| 7 | 4  | 0.00 | -218.62 | -49.50  | 8.86   | -49.50  | -8.86   | 132.7306 |
| 7 | 5  | 0.00 | 106.20  | -17.04  | -68.88 | -17.04  | 68.88   | 84.3565  |
| 7 | 6  | 0.00 | -31.00  | -138.44 | -88.03 | -138.44 | 88.03   | 135.1429 |
| 7 | 7  | 0.00 | -11.00  | -101.17 | 41.17  | -101.17 | -41.17  | 89.4086  |
| 7 | 8  | 0.00 | -794.69 | 121.53  | -      | 121.53  | 136.55  | 482.4808 |
|   |    |      |         |         | 136.55 |         |         |          |
| 7 | 9  | 0.00 | 44.99   | -166.25 | -45.39 | -166.25 | 45.39   | 143.0882 |
| 7 | 10 | 0.00 | 53.79   | 12.79   | 32.76  | 12.79   | -32.76  | 42.2964  |
| 7 | 11 | 0.00 | -41.41  | 37.82   | -15.85 | 37.82   | 15.85   | 41.1418  |
| 7 | 12 | 0.00 | 8.90    | -33.06  | 145.36 | -33.06  | -145.36 | 121.8253 |
| 7 | 13 | 0.00 | -185.18 | 50.00   | -40.53 | 50.00   | 40.53   | 119.1316 |
| 7 | 14 | 0.00 | -26.74  | -44.55  | -30.82 | -44.55  | 30.82   | 46.8479  |

|   |    |      |         |        |        |        |         |          |
|---|----|------|---------|--------|--------|--------|---------|----------|
| 7 | 15 | 0.00 | 5.10    | 18.09  | 28.30  | 18.09  | -28.30  | 27.5819  |
| 7 | 16 | 0.00 | 56.42   | -15.88 | 5.85   | -15.88 | -5.85   | 35.3837  |
| 7 | 17 | 0.00 | 73.91   | -1.08  | 7.63   | -1.08  | -7.63   | 43.1333  |
| 7 | 18 | 0.00 | -8.36   | -4.91  | -89.36 | -4.91  | 89.36   | 73.2314  |
| 7 | 19 | 0.00 | 38.22   | -55.07 | 25.08  | -55.07 | -25.08  | 54.1116  |
| 7 | 20 | 0.00 | -1.79   | 27.33  | 49.50  | 27.33  | -49.50  | 46.1792  |
| 7 | 21 | 0.00 | -10.39  | -68.05 | 28.92  | -68.05 | -28.92  | 60.6693  |
| 7 | 22 | 0.00 | 1.79    | 19.23  | -9.86  | 19.23  | 9.86    | 17.6751  |
| 7 | 23 | 0.00 | -112.49 | 56.36  | -16.54 | 56.36  | 16.54   | 80.7342  |
| 7 | 24 | 0.00 | -1.83   | -20.87 | -45.03 | -20.87 | 45.03   | 40.5375  |
| 7 | 25 | 0.00 | 38.12   | -39.65 | -15.07 | -39.65 | 15.07   | 41.0349  |
| 7 | 26 | 0.00 | 10.09   | 13.81  | -34.67 | 13.81  | 34.67   | 31.0229  |
| 7 | 27 | 0.00 | 2.63    | 8.78   | 0.94   | 8.78   | -0.94   | 7.3680   |
| 7 | 28 | 0.00 | 43.38   | 196.58 | 32.72  | 196.58 | -32.72  | 164.6313 |
| 7 | 29 | 0.00 | -37.65  | 4.78   | -62.39 | 4.78   | 62.39   | 55.5225  |
| 7 | 30 | 0.00 | -50.53  | 72.74  | 8.42   | 72.74  | -8.42   | 66.5264  |
| 8 | 0  | 0.00 | 31.35   | 114.91 | 169.72 | 114.91 | -169.72 | 168.3263 |
| 8 | 1  | 0.00 | 17.12   | -84.63 | 529.38 | -84.63 | -529.38 | 437.8371 |
| 8 | 2  | 0.00 | 49.25   | 376.13 | -      | 376.13 | 324.72  | 406.7183 |
|   |    |      |         |        | 324.72 |        |         |          |
| 8 | 3  | 0.00 | 56.57   | 313.75 | 372.56 | 313.75 | -372.56 | 399.0322 |
| 8 | 4  | 0.00 | -119.22 | 5.71   | -59.90 | 5.71   | 59.90   | 84.5668  |
| 8 | 5  | 0.00 | -191.50 | 87.58  | -0.12  | 87.58  | 0.12    | 131.6723 |
| 8 | 6  | 0.00 | -2.05   | -88.10 | 142.34 | -88.10 | -142.34 | 136.6855 |
| 8 | 7  | 0.00 | 11.26   | 39.01  | 100.87 | 39.01  | -100.87 | 88.5435  |
| 8 | 8  | 0.00 | 113.14  | 151.10 | 43.26  | 151.10 | -43.26  | 143.9976 |
| 8 | 9  | 0.00 | 790.43  | -32.88 | -      | -32.88 | 185.78  | 481.6535 |
|   |    |      |         |        | 185.78 |        |         |          |
| 8 | 10 | 0.00 | -53.38  | -30.57 | 17.66  | -30.57 | -17.66  | 42.1988  |
| 8 | 11 | 0.00 | -43.01  | 21.73  | 33.98  | 21.73  | -33.98  | 41.2453  |
| 8 | 12 | 0.00 | 27.56   | 143.54 | 30.15  | 143.54 | -30.15  | 120.8099 |
| 8 | 13 | 0.00 | -4.25   | 48.85  | 32.50  | 48.85  | -32.50  | 47.9695  |
| 8 | 14 | 0.00 | 191.20  | 13.59  | -52.74 | 13.59  | 52.74   | 119.0096 |
| 8 | 15 | 0.00 | 1.64    | 28.86  | -18.03 | 28.86  | 18.03   | 27.8008  |
| 8 | 16 | 0.00 | 70.90   | -11.76 | -14.29 | -11.76 | 14.29   | 43.6341  |
| 8 | 17 | 0.00 | -60.16  | -6.42  | 8.21   | -6.42  | -8.21   | 35.7606  |
| 8 | 18 | 0.00 | -15.58  | -89.47 | 5.97   | -89.47 | -5.97   | 73.7649  |
| 8 | 19 | 0.00 | -18.78  | -24.24 | -49.23 | -24.24 | 49.23   | 46.0978  |
| 8 | 20 | 0.00 | -54.92  | -45.38 | 27.74  | -45.38 | -27.74  | 53.7708  |
| 8 | 21 | 0.00 | 9.56    | 28.22  | 68.22  | 28.22  | -68.22  | 60.5312  |
| 8 | 22 | 0.00 | -0.66   | -8.17  | -19.39 | -8.17  | 19.39   | 17.1841  |
| 8 | 23 | 0.00 | 11.70   | 19.65  | 45.40  | 19.65  | -45.40  | 40.9530  |
| 8 | 24 | 0.00 | 127.41  | 33.50  | -24.55 | 33.50  | 24.55   | 81.0004  |
| 8 | 25 | 0.00 | -9.11   | 15.42  | -35.04 | 15.42  | 35.04   | 31.6973  |



|    |    |      |         |         |        |         |         |          |
|----|----|------|---------|---------|--------|---------|---------|----------|
| 8  | 26 | 0.00 | 53.57   | 29.37   | 12.61  | 29.37   | -12.61  | 40.4679  |
| 8  | 27 | 0.00 | -0.75   | 1.29    | -9.15  | 1.29    | 9.15    | 7.5572   |
| 8  | 28 | 0.00 | -4.55   | 35.78   | -      | 35.78   | 198.84  | 164.9806 |
|    |    |      |         |         |        |         | 198.84  |          |
| 8  | 29 | 0.00 | 77.16   | 56.26   | 5.43   | 56.26   | -5.43   | 64.1431  |
| 8  | 30 | 0.00 | -30.27  | -2.01   | 61.21  | -2.01   | -61.21  | 52.9707  |
| 9  | 0  | 0.00 | 515.37  | -48.01  | -16.35 | -48.01  | 16.35   | 300.4168 |
| 9  | 1  | 0.00 | -27.80  | 1.68    | 5.35   | 1.68    | -5.35   | 16.6906  |
| 9  | 2  | 0.00 | -103.90 | -590.97 | 205.68 | -590.97 | -205.68 | 514.4236 |
| 9  | 3  | 0.00 | 77.53   | 197.46  | 605.74 | 197.46  | -605.74 | 522.1219 |
| 9  | 4  | 0.00 | -45.40  | -168.07 | -      | -168.07 | 150.45  | 186.0346 |
|    |    |      |         |         |        |         | 150.45  |          |
| 9  | 5  | 0.00 | -18.76  | -149.94 | 172.18 | -149.94 | -172.18 | 186.7332 |
| 9  | 6  | 0.00 | -153.36 | 19.27   | 9.01   | 19.27   | -9.01   | 90.2299  |
| 9  | 7  | 0.00 | 304.55  | -29.06  | -9.11  | -29.06  | 9.11    | 177.5816 |
| 9  | 8  | 0.00 | 18.01   | 67.78   | -81.36 | 67.78   | 81.36   | 87.0852  |
| 9  | 9  | 0.00 | 25.01   | 82.81   | 67.80  | 82.81   | -67.80  | 88.5704  |
| 9  | 10 | 0.00 | 6.74    | 20.79   | 74.11  | 20.79   | -74.11  | 62.9668  |
| 9  | 11 | 0.00 | -15.76  | -73.61  | 22.11  | -73.61  | -22.11  | 63.4112  |
| 9  | 12 | 0.00 | 533.56  | -51.99  | -16.84 | -51.99  | 16.84   | 311.2659 |
| 9  | 13 | 0.00 | 0.58    | -3.41   | -55.66 | -3.41   | 55.66   | 45.5326  |
| 9  | 14 | 0.00 | 12.92   | 55.67   | -3.49  | 55.67   | 3.49    | 46.1504  |
| 9  | 15 | 0.00 | 49.94   | -5.80   | -2.30  | -5.80   | 2.30    | 29.2795  |
| 9  | 16 | 0.00 | 7.26    | 15.31   | 23.35  | 15.31   | -23.35  | 23.1801  |
| 9  | 17 | 0.00 | -7.11   | -23.68  | 15.79  | -23.68  | -15.79  | 23.5986  |
| 9  | 18 | 0.00 | -209.99 | 20.49   | 7.36   | 20.49   | -7.36   | 122.5341 |
| 9  | 19 | 0.00 | -12.71  | -58.91  | -15.91 | -58.91  | 15.91   | 50.3606  |
| 9  | 20 | 0.00 | -1.84   | 15.22   | -59.81 | 15.22   | 59.81   | 50.4022  |
| 9  | 21 | 0.00 | 122.14  | -11.15  | -3.65  | -11.15  | 3.65    | 71.1652  |
| 9  | 22 | 0.00 | -70.04  | 6.95    | 2.92   | 6.95    | -2.92   | 40.9034  |
| 9  | 23 | 0.00 | 12.12   | 42.84   | 21.58  | 42.84   | -21.58  | 39.7862  |
| 9  | 24 | 0.00 | -0.51   | -21.39  | 44.55  | -21.39  | -44.55  | 40.3515  |
| 9  | 25 | 0.00 | -11.38  | -61.78  | 27.20  | -61.78  | -27.20  | 55.5059  |
| 9  | 26 | 0.00 | 9.38    | 26.95   | 62.95  | 26.95   | -62.95  | 56.1723  |
| 9  | 27 | 0.00 | 64.82   | -6.45   | -1.74  | -6.45   | 1.74    | 37.8193  |
| 9  | 28 | 0.00 | 14.31   | -3.49   | -0.63  | -3.49   | 0.63    | 8.7546   |
| 9  | 29 | 0.00 | -5.66   | -47.25  | 52.00  | -47.25  | -52.00  | 57.4606  |
| 9  | 30 | 0.00 | 14.68   | 50.67   | 47.20  | 50.67   | -47.20  | 57.1725  |
| 10 | 0  | 0.00 | 106.82  | -10.86  | -2.44  | -10.86  | 2.44    | 62.3386  |
| 10 | 1  | 0.00 | 5.92    | -1.33   | -1.10  | -1.33   | 1.10    | 3.6970   |
| 10 | 2  | 0.00 | -13.56  | -19.51  | -      | -19.51  | 155.29  | 128.0301 |
|    |    |      |         |         |        |         | 155.29  |          |
| 10 | 3  | 0.00 | -28.67  | -153.23 | 22.27  | -153.23 | -22.27  | 127.5052 |
| 10 | 4  | 0.00 | 13.56   | 54.53   | -2.50  | 54.53   | 2.50    | 45.2527  |

|    |    |      |         |         |        |         |         |          |
|----|----|------|---------|---------|--------|---------|---------|----------|
| 10 | 5  | 0.00 | -3.87   | -2.48   | -55.78 | -2.48   | 55.78   | 45.6439  |
| 10 | 6  | 0.00 | 128.87  | -13.92  | -3.81  | -13.92  | 3.81    | 75.3305  |
| 10 | 7  | 0.00 | 7.88    | -0.62   | 0.27   | -0.62   | -0.27   | 4.5829   |
| 10 | 8  | 0.00 | 22.85   | 118.61  | -15.10 | 118.61  | 15.10   | 98.5136  |
| 10 | 9  | 0.00 | 11.49   | 14.65   | 119.47 | 14.65   | -119.47 | 98.5011  |
| 10 | 10 | 0.00 | 160.03  | 685.51  | 399.59 | 685.51  | -399.59 | 654.4213 |
| 10 | 11 | 0.00 | -36.33  | -399.76 | 693.89 | -399.76 | -693.89 | 654.1923 |
| 10 | 12 | 0.00 | -67.63  | 6.63    | 4.77   | 6.63    | -4.77   | 39.6116  |
| 10 | 13 | 0.00 | 2.88    | -43.18  | 194.66 | -43.18  | -194.66 | 162.8111 |
| 10 | 14 | 0.00 | -40.56  | -193.27 | -42.01 | -193.27 | 42.01   | 163.1782 |
| 10 | 15 | 0.00 | 23.43   | -4.85   | -0.59  | -4.85   | 0.59    | 14.1033  |
| 10 | 16 | 0.00 | 9.69    | 31.18   | 42.88  | 31.18   | -42.88  | 43.6489  |
| 10 | 17 | 0.00 | -7.02   | -40.97  | 32.38  | -40.97  | -32.38  | 42.8303  |
| 10 | 18 | 0.00 | -74.52  | 7.55    | 1.93   | 7.55    | -1.93   | 43.4921  |
| 10 | 19 | 0.00 | 3.91    | 23.74   | -16.77 | 23.74   | 16.77   | 23.8392  |
| 10 | 20 | 0.00 | 4.59    | 16.27   | 24.17  | 16.27   | -24.17  | 23.9365  |
| 10 | 21 | 0.00 | 16.45   | -1.74   | -0.59  | -1.74   | 0.59    | 9.6152   |
| 10 | 22 | 0.00 | 27.36   | -3.20   | -1.00  | -3.20   | 1.00    | 16.0317  |
| 10 | 23 | 0.00 | 2.05    | -9.99   | 63.26  | -9.99   | -63.26  | 52.3051  |
| 10 | 24 | 0.00 | -12.95  | -62.25  | -9.31  | -62.25  | 9.31    | 51.9332  |
| 10 | 25 | 0.00 | 14.70   | 38.21   | 114.66 | 38.21   | -114.66 | 99.0453  |
| 10 | 26 | 0.00 | 20.00   | 114.08  | -38.92 | 114.08  | 38.92   | 99.0926  |
| 10 | 27 | 0.00 | -3.24   | 0.97    | 0.17   | 0.97    | -0.17   | 2.0361   |
| 10 | 28 | 0.00 | 6.61    | 1.10    | 0.78   | 1.10    | -0.78   | 3.9719   |
| 10 | 29 | 0.00 | 18.75   | 99.87   | -14.07 | 99.87   | 14.07   | 83.0573  |
| 10 | 30 | 0.00 | -8.85   | -13.50  | -99.91 | -13.50  | 99.91   | 82.4759  |
| 11 | 0  | 0.00 | 34.63   | 116.73  | 180.15 | 116.73  | -180.15 | 176.4077 |
| 11 | 1  | 0.00 | 22.96   | 73.84   | 133.03 | 73.84   | -133.03 | 124.9344 |
| 11 | 2  | 0.00 | -17.09  | -4.01   | 80.94  | -4.01   | -80.94  | 66.8999  |
| 11 | 3  | 0.00 | -39.39  | -78.43  | -3.67  | -78.43  | 3.67    | 68.0222  |
| 11 | 4  | 0.00 | -106.77 | -0.84   | -12.65 | -0.84   | 12.65   | 62.5068  |
| 11 | 5  | 0.00 | -33.60  | 21.03   | -10.61 | 21.03   | 10.61   | 27.3168  |
| 11 | 6  | 0.00 | 0.20    | -42.00  | 103.50 | -42.00  | -103.50 | 91.2004  |
| 11 | 7  | 0.00 | -81.73  | -245.67 | -      | -245.67 | 534.92  | 482.9307 |
|    |    |      |         |         | 534.92 |         |         |          |
| 11 | 8  | 0.00 | -6.46   | -2.97   | 10.64  | -2.97   | -10.64  | 9.7603   |
| 11 | 9  | 0.00 | -15.12  | 14.56   | 1.78   | 14.56   | -1.78   | 14.8205  |
| 11 | 10 | 0.00 | -376.92 | 36.88   | -8.84  | 36.88   | 8.84    | 219.8069 |
| 11 | 11 | 0.00 | 498.15  | -70.09  | -14.82 | -70.09  | 14.82   | 293.4950 |
| 11 | 12 | 0.00 | 56.26   | 207.42  | 230.93 | 207.42  | -230.93 | 255.5182 |
| 11 | 13 | 0.00 | 97.43   | 59.82   | -98.45 | 59.82   | 98.45   | 109.5966 |
| 11 | 14 | 0.00 | 28.12   | -100.64 | -67.96 | -100.64 | 67.96   | 100.4733 |
| 11 | 15 | 0.00 | 37.45   | 78.39   | 237.58 | 78.39   | -237.58 | 205.4110 |
| 11 | 16 | 0.00 | -188.08 | -196.97 | 17.26  | -196.97 | -17.26  | 194.5630 |

|    |    |      |         |         |        |         |         |          |
|----|----|------|---------|---------|--------|---------|---------|----------|
| 11 | 17 | 0.00 | 163.90  | -10.44  | 205.45 | -10.44  | -205.45 | 192.7871 |
| 11 | 18 | 0.00 | 23.93   | 161.23  | -95.95 | 161.23  | 95.95   | 153.8134 |
| 11 | 19 | 0.00 | -37.92  | 0.97    | -6.24  | 0.97    | 6.24    | 22.4921  |
| 11 | 20 | 0.00 | -3.72   | -7.27   | 2.81   | -7.27   | -2.81   | 6.7166   |
| 11 | 21 | 0.00 | 4.79    | 14.00   | 30.52  | 14.00   | -30.52  | 27.5553  |
| 11 | 22 | 0.00 | -1.95   | -9.23   | -4.45  | -9.23   | 4.45    | 8.4418   |
| 11 | 23 | 0.00 | 26.15   | -14.47  | -18.22 | -14.47  | 18.22   | 24.2660  |
| 11 | 24 | 0.00 | 19.42   | -19.78  | 11.23  | -19.78  | -11.23  | 21.6938  |
| 11 | 25 | 0.00 | 27.10   | -14.45  | -3.69  | -14.45  | 3.69    | 19.8263  |
| 11 | 26 | 0.00 | -79.48  | 11.15   | -9.27  | 11.15   | 9.27    | 47.3905  |
| 11 | 27 | 0.00 | -4.57   | -11.84  | -31.41 | -11.84  | 31.41   | 27.5344  |
| 11 | 28 | 0.00 | -9.91   | -28.66  | -53.08 | -28.66  | 53.08   | 49.5849  |
| 11 | 29 | 0.00 | -69.81  | -3.18   | 6.07   | -3.18   | -6.07   | 40.6913  |
| 11 | 30 | 0.00 | -38.44  | 0.51    | -9.76  | 0.51    | 9.76    | 23.5844  |
| 12 | 0  | 0.00 | 28.59   | 179.27  | -      | 179.27  | 118.92  | 176.4245 |
|    |    |      |         |         | 118.92 |         |         |          |
| 12 | 1  | 0.00 | 21.17   | 131.12  | -75.69 | 131.12  | 75.69   | 124.2189 |
| 12 | 2  | 0.00 | 6.90    | -84.08  | -5.08  | -84.08  | 5.08    | 68.8915  |
| 12 | 3  | 0.00 | -25.18  | 7.42    | -80.36 | 7.42    | 80.36   | 67.4774  |
| 12 | 4  | 0.00 | 39.91   | 16.73   | -10.92 | 16.73   | 10.92   | 28.2317  |
| 12 | 5  | 0.00 | -100.12 | 18.99   | 21.62  | 18.99   | -21.62  | 62.3969  |
| 12 | 6  | 0.00 | 22.04   | 102.34  | 42.51  | 102.34  | -42.51  | 91.3727  |
| 12 | 7  | 0.00 | -88.70  | -531.51 | 249.70 | -531.51 | -249.70 | 482.2080 |
| 12 | 8  | 0.00 | -20.62  | -14.61  | -0.44  | -14.61  | 0.44    | 16.8570  |
| 12 | 9  | 0.00 | 6.71    | -4.31   | 14.21  | -4.31   | -14.21  | 12.7282  |
| 12 | 10 | 0.00 | 505.65  | -28.89  | -14.39 | -28.89  | 14.39   | 293.1242 |
| 12 | 11 | 0.00 | 374.47  | -38.78  | -29.53 | -38.78  | 29.53   | 219.8330 |
| 12 | 12 | 0.00 | 33.90   | 227.54  | -      | 227.54  | 210.82  | 254.0264 |
|    |    |      |         |         | 210.82 |         |         |          |
| 12 | 13 | 0.00 | 73.64   | 92.63   | 64.78  | 92.63   | -64.78  | 101.6143 |
| 12 | 14 | 0.00 | -82.63  | 74.69   | -94.19 | 74.69   | 94.19   | 109.1305 |
| 12 | 15 | 0.00 | 40.30   | 230.11  | -70.69 | 230.11  | 70.69   | 197.9221 |
| 12 | 16 | 0.00 | 136.79  | -12.20  | -      | -12.20  | 221.00  | 197.2234 |
|    |    |      |         |         | 221.00 |         |         |          |
| 12 | 17 | 0.00 | 105.61  | -232.36 | 1.95   | -232.36 | -1.95   | 199.2849 |
| 12 | 18 | 0.00 | -30.02  | -93.26  | -      | -93.26  | 164.62  | 155.4515 |
|    |    |      |         |         | 164.62 |         |         |          |
| 12 | 19 | 0.00 | -1.19   | 7.94    | -2.83  | 7.94    | 2.83    | 6.9167   |
| 12 | 20 | 0.00 | 35.94   | -6.37   | -8.60  | -6.37   | 8.60    | 22.5149  |
| 12 | 21 | 0.00 | 5.21    | 30.11   | -14.25 | 30.11   | 14.25   | 27.3648  |
| 12 | 22 | 0.00 | -0.66   | -4.40   | 9.13   | -4.40   | -9.13   | 8.2839   |
| 12 | 23 | 0.00 | 24.94   | 15.51   | -12.53 | 15.51   | 12.53   | 21.7342  |
| 12 | 24 | 0.00 | -32.88  | -8.94   | -16.69 | -8.94   | 16.69   | 24.4817  |
| 12 | 25 | 0.00 | 79.41   | -4.38   | -13.81 | -4.38   | 13.81   | 47.3489  |

|    |    |      |         |         |        |         |         |          |
|----|----|------|---------|---------|--------|---------|---------|----------|
| 12 | 26 | 0.00 | 32.07   | 9.26    | 1.91   | 9.26    | -1.91   | 20.0605  |
| 12 | 27 | 0.00 | -5.16   | -31.26  | 11.87  | -31.26  | -11.87  | 27.4639  |
| 12 | 28 | 0.00 | -7.41   | -53.08  | 28.96  | -53.08  | -28.96  | 49.5555  |
| 12 | 29 | 0.00 | 36.08   | -5.80   | -12.09 | -5.80   | 12.09   | 23.5328  |
| 12 | 30 | 0.00 | -66.25  | 16.87   | -1.36  | 16.87   | 1.36    | 40.6692  |
| 13 | 0  | 0.00 | -7.84   | -71.10  | 71.11  | -71.10  | -71.11  | 82.2297  |
| 13 | 1  | 0.00 | 1.62    | -35.79  | 141.23 | -35.79  | -141.23 | 118.9626 |
| 13 | 2  | 0.00 | -22.62  | 47.89   | 70.37  | 47.89   | -70.37  | 70.7164  |
| 13 | 3  | 0.00 | -7.20   | -70.68  | 45.72  | -70.68  | -45.72  | 68.8569  |
| 13 | 4  | 0.00 | -135.07 | -16.43  | 19.86  | -16.43  | -19.86  | 80.7726  |
| 13 | 5  | 0.00 | -11.83  | -16.93  | -29.86 | -16.93  | 29.86   | 28.8469  |
| 13 | 6  | 0.00 | -4.39   | 6.12    | -      | 6.12    | 131.90  | 107.8416 |
|    |    |      |         |         |        |         | 131.90  |          |
| 13 | 7  | 0.00 | -17.36  | -186.32 | 324.97 | -186.32 | -324.97 | 306.0189 |
| 13 | 8  | 0.00 | 134.17  | -42.43  | -66.27 | -42.43  | 66.27   | 100.6407 |
| 13 | 9  | 0.00 | 46.03   | -68.90  | 26.88  | -68.90  | -26.88  | 65.9754  |
| 13 | 10 | 0.00 | 334.97  | -16.04  | 9.62   | -16.04  | -9.62   | 193.9970 |
| 13 | 11 | 0.00 | 6.89    | 19.64   | -20.41 | 19.64   | 20.41   | 23.4668  |
| 13 | 12 | 0.00 | 33.82   | 208.44  | -      | 208.44  | 107.98  | 192.6635 |
|    |    |      |         |         |        |         | 107.98  |          |
| 13 | 13 | 0.00 | -14.72  | -187.31 | 25.41  | -187.31 | -25.41  | 154.5726 |
| 13 | 14 | 0.00 | -43.42  | 29.03   | 189.76 | 29.03   | -189.76 | 158.7330 |
| 13 | 15 | 0.00 | -6.87   | -115.43 | 357.16 | -115.43 | -357.16 | 306.4974 |
| 13 | 16 | 0.00 | -5.60   | -329.22 | 236.38 | -329.22 | -236.38 | 330.9350 |
| 13 | 17 | 0.00 | -175.04 | 252.38  | 323.86 | 252.38  | -323.86 | 350.1433 |
| 13 | 18 | 0.00 | 71.96   | 314.72  | 180.86 | 314.72  | -180.86 | 299.2748 |
| 13 | 19 | 0.00 | -27.39  | 8.10    | 4.73   | 8.10    | -4.73   | 17.5706  |
| 13 | 20 | 0.00 | -9.21   | 5.21    | -5.09  | 5.21    | 5.09    | 7.9776   |
| 13 | 21 | 0.00 | -2.04   | -10.15  | -4.15  | -10.15  | 4.15    | 9.0305   |
| 13 | 22 | 0.00 | -1.28   | 5.98    | -37.15 | 5.98    | 37.15   | 30.7322  |
| 13 | 23 | 0.00 | 6.50    | -27.94  | -14.47 | -27.94  | 14.47   | 25.9634  |
| 13 | 24 | 0.00 | -32.13  | -11.27  | 28.39  | -11.27  | -28.39  | 31.0824  |
| 13 | 25 | 0.00 | 29.19   | -0.08   | -20.03 | -0.08   | 20.03   | 23.4838  |
| 13 | 26 | 0.00 | 40.97   | 14.19   | 1.16   | 14.19   | -1.16   | 26.3562  |
| 13 | 27 | 0.00 | 1.75    | -20.94  | 91.87  | -20.94  | -91.87  | 76.9420  |
| 13 | 28 | 0.00 | 6.04    | 24.19   | 11.74  | 24.19   | -11.74  | 22.2295  |
| 13 | 29 | 0.00 | 63.57   | -12.08  | 9.22   | -12.08  | -9.22   | 38.7428  |
| 13 | 30 | 0.00 | -2.77   | -11.15  | -5.22  | -11.15  | 5.22    | 10.1786  |
| 14 | 0  | 0.00 | -18.32  | -71.01  | -70.70 | -71.01  | 70.70   | 82.4974  |
| 14 | 1  | 0.00 | -29.73  | -139.59 | -35.36 | -139.59 | 35.36   | 118.8210 |
| 14 | 2  | 0.00 | 14.99   | 71.54   | -45.58 | 71.54   | 45.58   | 69.7990  |
| 14 | 3  | 0.00 | 49.11   | 41.59   | 69.58  | 41.59   | -69.58  | 72.0046  |
| 14 | 4  | 0.00 | -0.22   | 20.93   | 30.81  | 20.93   | -30.81  | 30.4121  |
| 14 | 5  | 0.00 | 125.80  | -43.69  | 13.83  | -43.69  | -13.83  | 81.7023  |

|    |    |      |         |         |        |         |         |          |
|----|----|------|---------|---------|--------|---------|---------|----------|
| 14 | 6  | 0.00 | 26.59   | 129.77  | 4.31   | 129.77  | -4.31   | 107.1209 |
| 14 | 7  | 0.00 | -75.03  | -319.86 | -      | -319.86 | 186.10  | 305.2413 |
|    |    |      |         |         | 186.10 |         |         |          |
| 14 | 8  | 0.00 | -67.33  | -59.65  | 28.29  | -59.65  | -28.29  | 66.4586  |
| 14 | 9  | 0.00 | 153.65  | 12.15   | 58.62  | 12.15   | -58.62  | 101.2854 |
| 14 | 10 | 0.00 | -1.25   | 19.40   | -18.83 | 19.40   | 18.83   | 22.0863  |
| 14 | 11 | 0.00 | 324.39  | -50.76  | -30.65 | -50.76  | 30.65   | 193.4432 |
| 14 | 12 | 0.00 | 33.89   | 104.39  | 204.87 | 104.39  | -204.87 | 188.7560 |
| 14 | 13 | 0.00 | 75.89   | 19.05   | 188.77 | 19.05   | -188.77 | 160.9900 |
| 14 | 14 | 0.00 | 55.58   | 185.64  | -25.87 | 185.64  | 25.87   | 156.3672 |
| 14 | 15 | 0.00 | -83.24  | -352.22 | -      | -352.22 | 139.02  | 312.8897 |
|    |    |      |         |         | 139.02 |         |         |          |
| 14 | 16 | 0.00 | 303.36  | 194.72  | 309.05 | 194.72  | -309.05 | 345.8723 |
| 14 | 17 | 0.00 | 92.95   | 320.08  | -      | 320.08  | 227.55  | 325.1154 |
|    |    |      |         |         | 227.55 |         |         |          |
| 14 | 18 | 0.00 | -14.95  | -181.88 | 322.26 | -181.88 | -322.26 | 302.2621 |
| 14 | 19 | 0.00 | 10.25   | 3.21    | -5.54  | 3.21    | 5.54    | 7.8963   |
| 14 | 20 | 0.00 | -29.98  | -2.26   | -3.18  | -2.26   | 3.18    | 17.5996  |
| 14 | 21 | 0.00 | -0.21   | 4.21    | -10.44 | 4.21    | 10.44   | 9.1920   |
| 14 | 22 | 0.00 | 8.16    | 37.38   | 6.05   | 37.38   | -6.05   | 31.2747  |
| 14 | 23 | 0.00 | 30.19   | -17.54  | 26.09  | -17.54  | -26.09  | 31.0275  |
| 14 | 24 | 0.00 | 19.01   | 25.37   | 13.65  | 25.37   | -13.65  | 25.9570  |
| 14 | 25 | 0.00 | 33.62   | -21.15  | -3.63  | -21.15  | 3.63    | 26.1490  |
| 14 | 26 | 0.00 | -30.11  | 5.57    | -17.12 | 5.57    | 17.12   | 22.7658  |
| 14 | 27 | 0.00 | -19.50  | -91.16  | -20.81 | -91.16  | 20.81   | 77.1722  |
| 14 | 28 | 0.00 | 0.86    | -11.11  | 24.32  | -11.11  | -24.32  | 21.8367  |
| 14 | 29 | 0.00 | 2.53    | 11.61   | 4.67   | 11.61   | -4.67   | 10.3215  |
| 14 | 30 | 0.00 | -63.82  | 1.31    | 14.03  | 1.31    | -14.03  | 38.6010  |
| 15 | 0  | 0.00 | -294.50 | 28.99   | 10.65  | 28.99   | -10.65  | 171.8894 |
| 15 | 1  | 0.00 | -2.12   | 0.86    | 2.42   | 0.86    | -2.42   | 2.4281   |
| 15 | 2  | 0.00 | 31.57   | 157.26  | 8.86   | 157.26  | -8.86   | 129.8911 |
| 15 | 3  | 0.00 | -8.54   | 8.53    | -      | 8.53    | 156.96  | 128.4411 |
|    |    |      |         |         | 156.96 |         |         |          |
| 15 | 4  | 0.00 | -42.07  | -163.47 | -      | -163.47 | 111.43  | 163.3484 |
|    |    |      |         |         | 111.43 |         |         |          |
| 15 | 5  | 0.00 | -11.53  | -111.89 | 165.01 | -111.89 | -165.01 | 162.9195 |
| 15 | 6  | 0.00 | -56.32  | 8.09    | 3.24   | 8.09    | -3.24   | 33.2858  |
| 15 | 7  | 0.00 | -55.24  | 3.85    | 1.18   | 3.85    | -1.18   | 32.0619  |
| 15 | 8  | 0.00 | 11.77   | 61.23   | -21.38 | 61.23   | 21.38   | 53.3884  |
| 15 | 9  | 0.00 | 8.44    | 18.97   | 62.40  | 18.97   | -62.40  | 53.4742  |
| 15 | 10 | 0.00 | 51.14   | 229.90  | 91.34  | 229.90  | -91.34  | 204.1317 |
| 15 | 11 | 0.00 | -2.86   | -91.35  | 232.48 | -91.35  | -232.48 | 203.9540 |
| 15 | 12 | 0.00 | 68.43   | -8.76   | 0.84   | -8.76   | -0.84   | 40.1562  |
| 15 | 13 | 0.00 | -15.85  | 19.32   | -      | 19.32   | 330.76  | 270.6795 |

|    |    |      |         |         |        |         |         |          |
|----|----|------|---------|---------|--------|---------|---------|----------|
|    |    |      |         |         | 330.76 |         |         |          |
| 15 | 14 | 0.00 | 66.00   | 327.97  | 20.53  | 327.97  | -20.53  | 271.0028 |
| 15 | 15 | 0.00 | 142.52  | -12.63  | -6.92  | -12.63  | 6.92    | 83.1199  |
| 15 | 16 | 0.00 | 5.06    | 4.55    | 29.06  | 4.55    | -29.06  | 24.1935  |
| 15 | 17 | 0.00 | -9.22   | -33.10  | 2.32   | -33.10  | -2.32   | 27.6103  |
| 15 | 18 | 0.00 | 415.44  | -41.35  | -13.79 | -41.35  | 13.79   | 242.4805 |
| 15 | 19 | 0.00 | -4.15   | -26.12  | 22.81  | -26.12  | -22.81  | 28.4155  |
| 15 | 20 | 0.00 | -6.13   | -22.32  | -26.39 | -22.32  | 26.39   | 28.4418  |
| 15 | 21 | 0.00 | -21.79  | 2.22    | 0.51   | 2.22    | -0.51   | 12.7172  |
| 15 | 22 | 0.00 | 24.90   | -2.54   | -1.68  | -2.54   | 1.68    | 14.5895  |
| 15 | 23 | 0.00 | -5.89   | -29.62  | -0.92  | -29.62  | 0.92    | 24.4341  |
| 15 | 24 | 0.00 | -2.08   | 1.36    | -29.15 | 1.36    | 29.15   | 23.8570  |
| 15 | 25 | 0.00 | 8.07    | 23.94   | 51.74  | 23.94   | -51.74  | 46.7811  |
| 15 | 26 | 0.00 | 8.47    | 51.35   | -23.91 | 51.35   | 23.91   | 46.5072  |
| 15 | 27 | 0.00 | -0.97   | 0.38    | -0.03  | 0.38    | 0.03    | 0.6407   |
| 15 | 28 | 0.00 | 12.38   | -0.66   | 0.00   | -0.66   | 0.00    | 7.1679   |
| 15 | 29 | 0.00 | 10.26   | 43.95   | 22.96  | 43.95   | -22.96  | 40.9178  |
| 15 | 30 | 0.00 | 1.73    | 22.88   | -44.44 | 22.88   | 44.44   | 40.8240  |
| 16 | 0  | 0.00 | 9.00    | 31.62   | 87.35  | 31.62   | -87.35  | 76.0278  |
| 16 | 1  | 0.00 | 22.91   | 82.33   | 106.03 | 82.33   | -106.03 | 110.4024 |
| 16 | 2  | 0.00 | 21.26   | 33.11   | 80.35  | 33.11   | -80.35  | 72.0111  |
| 16 | 3  | 0.00 | -13.55  | -81.32  | 46.37  | -81.32  | -46.37  | 76.8328  |
| 16 | 4  | 0.00 | -60.73  | -27.47  | -0.52  | -27.47  | 0.52    | 41.6248  |
| 16 | 5  | 0.00 | -29.58  | 10.25   | -42.11 | 10.25   | 42.11   | 39.2921  |
| 16 | 6  | 0.00 | -17.85  | -90.93  | -48.69 | -90.93  | 48.69   | 84.8461  |
| 16 | 7  | 0.00 | -13.32  | -42.16  | -      | -42.16  | 138.77  | 118.6684 |
|    |    |      |         |         | 138.77 |         |         |          |
| 16 | 8  | 0.00 | 100.63  | 7.64    | -      | 7.64    | 111.83  | 108.4052 |
|    |    |      |         |         | 111.83 |         |         |          |
| 16 | 9  | 0.00 | -45.04  | -115.02 | -21.83 | -115.02 | 21.83   | 99.0638  |
| 16 | 10 | 0.00 | -173.99 | 14.82   | 20.73  | 14.82   | -20.73  | 102.5853 |
| 16 | 11 | 0.00 | 81.71   | 4.17    | 17.05  | 4.17    | -17.05  | 49.3042  |
| 16 | 12 | 0.00 | -20.30  | -217.78 | 164.64 | -217.78 | -164.64 | 223.2196 |
| 16 | 13 | 0.00 | 46.46   | 23.21   | 4.63   | 23.21   | -4.63   | 33.0596  |
| 16 | 14 | 0.00 | 40.55   | 33.32   | -20.74 | 33.32   | 20.74   | 39.6864  |
| 16 | 15 | 0.00 | -6.95   | 7.08    | -      | 7.08    | 335.15  | 273.7393 |
|    |    |      |         |         | 335.15 |         |         |          |
| 16 | 16 | 0.00 | 92.21   | 324.22  | -      | 324.22  | 115.66  | 286.0620 |
|    |    |      |         |         | 115.66 |         |         |          |
| 16 | 17 | 0.00 | -49.10  | -105.90 | -      | -105.90 | 322.34  | 278.4760 |
|    |    |      |         |         | 322.34 |         |         |          |
| 16 | 18 | 0.00 | -40.37  | -271.73 | -87.84 | -271.73 | 87.84   | 234.3330 |
| 16 | 19 | 0.00 | -33.82  | 2.41    | 11.06  | 2.41    | -11.06  | 21.6029  |
| 16 | 20 | 0.00 | 2.44    | 9.77    | 3.95   | 9.77    | -3.95   | 8.7190   |

|    |    |      |         |         |        |         |         |          |
|----|----|------|---------|---------|--------|---------|---------|----------|
| 16 | 21 | 0.00 | 0.68    | -1.29   | 27.96  | -1.29   | -27.96  | 22.8569  |
| 16 | 22 | 0.00 | -9.34   | -31.83  | -22.73 | -31.83  | 22.73   | 32.3874  |
| 16 | 23 | 0.00 | 12.54   | -18.47  | -11.42 | -18.47  | 11.42   | 19.1517  |
| 16 | 24 | 0.00 | -22.96  | -13.39  | 18.61  | -13.39  | -18.61  | 22.9377  |
| 16 | 25 | 0.00 | -8.56   | 13.14   | 22.99  | 13.14   | -22.99  | 22.1786  |
| 16 | 26 | 0.00 | -45.54  | -13.91  | 16.18  | -13.91  | -16.18  | 31.5407  |
| 16 | 27 | 0.00 | -5.21   | -21.96  | -50.24 | -21.96  | 50.24   | 44.8692  |
| 16 | 28 | 0.00 | -2.36   | 9.08    | -83.23 | 9.08    | 83.23   | 68.3738  |
| 16 | 29 | 0.00 | -12.78  | -9.22   | -9.60  | -9.22   | 9.60    | 13.1360  |
| 16 | 30 | 0.00 | 15.62   | 9.26    | -10.63 | 9.26    | 10.63   | 14.6227  |
| 17 | 0  | 0.00 | 15.31   | 86.78   | -32.37 | 86.78   | 32.37   | 76.1393  |
| 17 | 1  | 0.00 | 15.31   | 104.55  | -83.34 | 104.55  | 83.34   | 109.5246 |
| 17 | 2  | 0.00 | -12.62  | -80.50  | 41.96  | -80.50  | -41.96  | 74.4783  |
| 17 | 3  | 0.00 | -3.79   | -40.99  | -83.26 | -40.99  | 83.26   | 75.8050  |
| 17 | 4  | 0.00 | 26.20   | -0.82   | -37.13 | -0.82   | 37.13   | 33.8874  |
| 17 | 5  | 0.00 | -46.38  | 40.51   | 7.85   | 40.51   | -7.85   | 43.0367  |
| 17 | 6  | 0.00 | -5.20   | -47.52  | 92.79  | -47.52  | -92.79  | 85.1730  |
| 17 | 7  | 0.00 | -25.67  | -141.20 | 43.09  | -141.20 | -43.09  | 121.4459 |
| 17 | 8  | 0.00 | 3.51    | 114.20  | 19.86  | 114.20  | -19.86  | 94.6651  |
| 17 | 9  | 0.00 | -106.86 | 31.74   | -      | 31.74   | 109.72  | 111.8196 |
|    |    |      |         |         | 109.72 |         |         |          |
| 17 | 10 | 0.00 | 75.65   | -23.50  | -14.08 | -23.50  | 14.08   | 49.0711  |
| 17 | 11 | 0.00 | 174.91  | -28.64  | 6.17   | -28.64  | -6.17   | 103.7788 |
| 17 | 12 | 0.00 | 43.72   | 163.29  | 216.25 | 163.29  | -216.25 | 222.6857 |
| 17 | 13 | 0.00 | 32.41   | -25.39  | 28.69  | -25.39  | -28.69  | 36.4506  |
| 17 | 14 | 0.00 | -35.25  | 25.77   | 21.87  | 25.77   | -21.87  | 34.2897  |
| 17 | 15 | 0.00 | -69.76  | -326.77 | -28.33 | -326.77 | 28.33   | 270.8191 |
| 17 | 16 | 0.00 | 32.17   | 99.63   | 327.13 | 99.63   | -327.13 | 279.8305 |
| 17 | 17 | 0.00 | 22.77   | 334.95  | -      | 334.95  | 107.03  | 287.4093 |
|    |    |      |         |         | 107.03 |         |         |          |
| 17 | 18 | 0.00 | -4.28   | -91.13  | 277.81 | -91.13  | -277.81 | 238.7359 |
| 17 | 19 | 0.00 | -1.98   | -10.23  | -2.28  | -10.23  | 2.28    | 8.6337   |
| 17 | 20 | 0.00 | 34.23   | -5.93   | 8.58   | -5.93   | -8.58   | 21.5194  |
| 17 | 21 | 0.00 | 6.05    | 27.63   | 1.29   | 27.63   | -1.29   | 22.8529  |
| 17 | 22 | 0.00 | -2.65   | -22.82  | 31.95  | -22.82  | -31.95  | 32.0943  |
| 17 | 23 | 0.00 | -19.32  | 15.72   | -17.18 | 15.72   | 17.18   | 22.0439  |
| 17 | 24 | 0.00 | -20.77  | -14.67  | -13.35 | -14.67  | 13.35   | 20.1516  |
| 17 | 25 | 0.00 | 40.32   | -23.89  | 11.83  | -23.89  | -11.83  | 31.8699  |
| 17 | 26 | 0.00 | -16.40  | -12.30  | -20.26 | -12.30  | 20.26   | 21.5443  |
| 17 | 27 | 0.00 | -9.05   | -50.49  | 22.06  | -50.49  | -22.06  | 45.2904  |
| 17 | 28 | 0.00 | -17.71  | -82.39  | -9.63  | -82.39  | 9.63    | 68.4966  |
| 17 | 29 | 0.00 | -12.13  | 13.87   | -9.12  | 13.87   | 9.12    | 15.2560  |
| 17 | 30 | 0.00 | -7.90   | 9.88    | 11.10  | 9.88    | -11.10  | 12.9622  |
| 18 | 0  | 0.00 | -92.19  | 8.58    | -1.75  | 8.58    | 1.75    | 53.7040  |

|    |    |      |         |        |        |        |         |          |
|----|----|------|---------|--------|--------|--------|---------|----------|
| 18 | 1  | 0.00 | -5.02   | -3.19  | -6.51  | -3.19  | 6.51    | 6.5907   |
| 18 | 2  | 0.00 | -16.77  | -79.13 | -10.31 | -79.13 | 10.31   | 65.8709  |
| 18 | 3  | 0.00 | 4.24    | -3.55  | 73.64  | -3.55  | -73.64  | 60.2464  |
| 18 | 4  | 0.00 | 22.65   | 82.83  | 40.61  | 82.83  | -40.61  | 76.4482  |
| 18 | 5  | 0.00 | 4.00    | 40.91  | -80.25 | 40.91  | 80.25   | 73.5830  |
| 18 | 6  | 0.00 | 40.26   | -0.88  | 0.94   | -0.88  | -0.94   | 23.2679  |
| 18 | 7  | 0.00 | 70.37   | -7.61  | 6.33   | -7.61  | -6.33   | 41.4242  |
| 18 | 8  | 0.00 | -5.25   | -33.35 | 101.33 | -33.35 | -101.33 | 87.1542  |
| 18 | 9  | 0.00 | -19.76  | -88.06 | -34.07 | -88.06 | 34.07   | 77.9340  |
| 18 | 10 | 0.00 | 51.55   | 187.27 | 49.42  | 187.27 | -49.42  | 160.9163 |
| 18 | 11 | 0.00 | -0.18   | -51.88 | 189.26 | -51.88 | -189.26 | 160.2309 |
| 18 | 12 | 0.00 | 252.15  | -11.24 | -10.66 | -11.24 | 10.66   | 146.1273 |
| 18 | 13 | 0.00 | -4.32   | 97.05  | -      | 97.05  | 377.76  | 318.4658 |
|    |    |      |         |        | 377.76 |        |         |          |
| 18 | 14 | 0.00 | 77.31   | 373.00 | 101.50 | 373.00 | -101.50 | 318.7681 |
| 18 | 15 | 0.00 | 282.32  | -32.45 | 8.69   | -32.45 | -8.69   | 165.2893 |
| 18 | 16 | 0.00 | 3.84    | -10.59 | 30.15  | -10.59 | -30.15  | 26.1858  |
| 18 | 17 | 0.00 | -5.33   | -9.06  | 22.30  | -9.06  | -22.30  | 19.8927  |
| 18 | 18 | 0.00 | 418.73  | -26.95 | -3.52  | -26.95 | 3.52    | 242.7703 |
| 18 | 19 | 0.00 | 7.00    | 27.11  | 0.38   | 27.11  | -0.38   | 22.5033  |
| 18 | 20 | 0.00 | 1.77    | -1.73  | 27.48  | -1.73  | -27.48  | 22.5050  |
| 18 | 21 | 0.00 | -19.61  | 2.25   | -0.94  | 2.25   | 0.94    | 11.4956  |
| 18 | 22 | 0.00 | -22.09  | 3.43   | 2.30   | 3.43   | -2.30   | 13.1919  |
| 18 | 23 | 0.00 | 1.90    | 1.18   | 43.16  | 1.18   | -43.16  | 35.2702  |
| 18 | 24 | 0.00 | -7.44   | -42.15 | -0.70  | -42.15 | 0.70    | 34.6871  |
| 18 | 25 | 0.00 | 0.12    | -20.33 | 45.38  | -20.33 | -45.38  | 40.6010  |
| 18 | 26 | 0.00 | 12.69   | 46.74  | 18.41  | 46.74  | -18.41  | 41.6659  |
| 18 | 27 | 0.00 | 47.74   | -4.32  | 2.10   | -4.32  | -2.10   | 27.8403  |
| 18 | 28 | 0.00 | 38.66   | -5.28  | 3.01   | -5.28  | -3.01   | 22.8653  |
| 18 | 29 | 0.00 | -1.52   | -4.76  | -3.84  | -4.76  | 3.84    | 5.0701   |
| 18 | 30 | 0.00 | -0.91   | -4.71  | 6.33   | -4.71  | -6.33   | 6.4636   |
| 19 | 0  | 0.00 | -8.59   | -70.29 | 68.12  | -70.29 | -68.12  | 80.0746  |
| 19 | 1  | 0.00 | 3.80    | 29.01  | -32.70 | 29.01  | 32.70   | 35.7593  |
| 19 | 2  | 0.00 | 1.86    | -18.74 | 5.03   | -18.74 | -5.03   | 15.8791  |
| 19 | 3  | 0.00 | -3.96   | -4.79  | -18.05 | -4.79  | 18.05   | 15.4183  |
| 19 | 4  | 0.00 | 54.36   | 16.31  | -36.23 | 16.31  | 36.23   | 45.1378  |
| 19 | 5  | 0.00 | -3.25   | 36.99  | 23.68  | 36.99  | -23.68  | 35.9099  |
| 19 | 6  | 0.00 | -10.27  | -61.55 | 42.85  | -61.55 | -42.85  | 61.5211  |
| 19 | 7  | 0.00 | 33.74   | 209.40 | -      | 209.40 | 119.59  | 197.8540 |
|    |    |      |         |        | 119.59 |        |         |          |
| 19 | 8  | 0.00 | 2.11    | -43.13 | -77.33 | -43.13 | 77.33   | 72.3065  |
| 19 | 9  | 0.00 | -45.51  | -71.35 | 42.31  | -71.35 | -42.31  | 72.6477  |
| 19 | 10 | 0.00 | -231.57 | 134.12 | 8.25   | 134.12 | -8.25   | 172.9520 |
| 19 | 11 | 0.00 | -121.25 | 11.08  | -      | 11.08  | 107.51  | 112.6409 |



|    |    |      |         |         |        |         |         |          |
|----|----|------|---------|---------|--------|---------|---------|----------|
|    |    |      |         |         | 107.51 |         |         |          |
| 19 | 12 | 0.00 | 1.72    | 15.35   | 31.89  | 15.35   | -31.89  | 28.9145  |
| 19 | 13 | 0.00 | 97.70   | 170.71  | 495.06 | 170.71  | -495.06 | 431.2764 |
| 19 | 14 | 0.00 | 140.15  | 488.15  | -      | 488.15  | 170.72  | 429.9277 |
|    |    |      |         |         | 170.72 |         |         |          |
| 19 | 15 | 0.00 | 14.49   | 44.80   | 215.71 | 44.80   | -215.71 | 180.0793 |
| 19 | 16 | 0.00 | 630.63  | -273.00 | -24.77 | -273.00 | 24.77   | 427.3871 |
| 19 | 17 | 0.00 | 235.21  | -33.62  | 199.59 | -33.62  | -199.59 | 213.8977 |
| 19 | 18 | 0.00 | 36.09   | 188.72  | -47.31 | 188.72  | 47.31   | 160.2180 |
| 19 | 19 | 0.00 | -2.62   | 13.06   | -16.21 | 13.06   | 16.21   | 17.0638  |
| 19 | 20 | 0.00 | 7.55    | -17.72  | -13.26 | -17.72  | 13.26   | 18.5890  |
| 19 | 21 | 0.00 | -0.42   | -2.06   | -0.26  | -2.06   | 0.26    | 1.7126   |
| 19 | 22 | 0.00 | -1.63   | -12.50  | 11.17  | -12.50  | -11.17  | 13.7198  |
| 19 | 23 | 0.00 | -15.16  | -6.95   | -29.75 | -6.95   | 29.75   | 26.4358  |
| 19 | 24 | 0.00 | 8.35    | -31.09  | 7.35   | -31.09  | -7.35   | 26.5264  |
| 19 | 25 | 0.00 | -55.27  | -20.10  | -32.49 | -20.10  | 32.49   | 44.6243  |
| 19 | 26 | 0.00 | -48.83  | 38.76   | -23.03 | 38.76   | 23.03   | 46.3674  |
| 19 | 27 | 0.00 | 6.54    | 33.32   | -3.70  | 33.32   | 3.70    | 27.6321  |
| 19 | 28 | 0.00 | 0.48    | -3.13   | 22.36  | -3.13   | -22.36  | 18.4370  |
| 19 | 29 | 0.00 | -21.91  | -23.18  | 3.75   | -23.18  | -3.75   | 22.9695  |
| 19 | 30 | 0.00 | 19.26   | -6.30   | -24.82 | -6.30   | 24.82   | 23.6812  |
| 20 | 0  | 0.00 | 16.94   | 67.07   | 70.88  | 67.07   | -70.88  | 80.2739  |
| 20 | 1  | 0.00 | -8.23   | -32.30  | -28.85 | -32.30  | 28.85   | 35.6789  |
| 20 | 2  | 0.00 | -0.17   | -4.51   | -17.81 | -4.51   | 17.81   | 15.0011  |
| 20 | 3  | 0.00 | 8.49    | 17.55   | -4.50  | 17.55   | 4.50    | 15.5840  |
| 20 | 4  | 0.00 | 20.77   | 35.14   | 23.89  | 35.14   | -23.89  | 36.7083  |
| 20 | 5  | 0.00 | 50.06   | -28.76  | 32.99  | -28.76  | -32.99  | 45.9600  |
| 20 | 6  | 0.00 | 11.24   | 39.98   | 60.82  | 39.98   | -60.82  | 59.7809  |
| 20 | 7  | 0.00 | -36.13  | -117.59 | -      | -117.59 | 210.80  | 198.1863 |
|    |    |      |         |         | 210.80 |         |         |          |
| 20 | 8  | 0.00 | -20.45  | 78.97   | -43.18 | 78.97   | 43.18   | 74.4306  |
| 20 | 9  | 0.00 | -28.65  | -41.08  | -74.95 | -41.08  | 74.95   | 71.7193  |
| 20 | 10 | 0.00 | -108.13 | 10.36   | 113.39 | 10.36   | -113.39 | 111.9841 |
| 20 | 11 | 0.00 | 274.85  | 85.06   | -7.57  | 85.06   | 7.57    | 173.3278 |
| 20 | 12 | 0.00 | 6.75    | 37.07   | -18.46 | 37.07   | 18.46   | 34.0366  |
| 20 | 13 | 0.00 | -32.85  | -502.72 | 172.20 | -502.72 | -172.20 | 434.2962 |
| 20 | 14 | 0.00 | 30.53   | 171.05  | 492.79 | 171.05  | -492.79 | 426.2754 |
| 20 | 15 | 0.00 | 15.59   | 208.35  | -34.05 | 208.35  | 34.05   | 172.6087 |
| 20 | 16 | 0.00 | 214.14  | -4.37   | -      | -4.37   | 217.39  | 216.3415 |
|    |    |      |         |         | 217.39 |         |         |          |
| 20 | 17 | 0.00 | -713.84 | -147.88 | 9.03   | -147.88 | -9.03   | 429.5221 |
| 20 | 18 | 0.00 | -17.26  | -43.74  | -      | -43.74  | 193.81  | 162.5309 |
|    |    |      |         |         | 193.81 |         |         |          |
| 20 | 19 | 0.00 | 15.71   | 15.30   | 12.39  | 15.30   | -12.39  | 18.4572  |

|    |    |      |         |         |        |         |         |          |
|----|----|------|---------|---------|--------|---------|---------|----------|
| 20 | 20 | 0.00 | 5.50    | 12.64   | -16.56 | 12.64   | 16.56   | 17.3037  |
| 20 | 21 | 0.00 | -0.03   | -0.75   | 2.20   | -0.75   | -2.20   | 1.8979   |
| 20 | 22 | 0.00 | 2.74    | 10.79   | 12.20  | 10.79   | -12.20  | 13.3920  |
| 20 | 23 | 0.00 | 19.52   | 28.57   | -8.62  | 28.57   | 8.62    | 26.8460  |
| 20 | 24 | 0.00 | 8.19    | -9.08   | -30.21 | -9.08   | 30.21   | 26.1869  |
| 20 | 25 | 0.00 | 58.81   | 28.95   | -26.02 | 28.95   | 26.02   | 46.5077  |
| 20 | 26 | 0.00 | -41.14  | 29.31   | 35.21  | 29.31   | -35.21  | 44.3100  |
| 20 | 27 | 0.00 | -3.51   | -2.77   | -34.06 | -2.77   | 34.06   | 27.9752  |
| 20 | 28 | 0.00 | 4.00    | 21.64   | 1.94   | 21.64   | -1.94   | 17.8895  |
| 20 | 29 | 0.00 | -23.82  | -1.66   | -24.00 | -1.66   | 24.00   | 23.9785  |
| 20 | 30 | 0.00 | -12.00  | 27.10   | -3.49  | 27.10   | 3.49    | 23.3608  |
| 21 | 0  | 0.00 | 144.37  | -12.70  | -4.60  | -12.70  | 4.60    | 84.0785  |
| 21 | 1  | 0.00 | 15.78   | -1.77   | -0.23  | -1.77   | 0.23    | 9.2264   |
| 21 | 2  | 0.00 | 0.71    | 5.07    | -2.39  | 5.07    | 2.39    | 4.5949   |
| 21 | 3  | 0.00 | -0.64   | -2.27   | -4.88  | -2.27   | 4.88    | 4.4100   |
| 21 | 4  | 0.00 | -5.69   | -39.84  | 27.47  | -39.84  | -27.47  | 39.6486  |
| 21 | 5  | 0.00 | 7.88    | 26.42   | 40.25  | 26.42   | -40.25  | 39.5738  |
| 21 | 6  | 0.00 | 41.28   | -2.60   | -1.74  | -2.60   | 1.74    | 23.9695  |
| 21 | 7  | 0.00 | -23.76  | 1.47    | 0.42   | 1.47    | -0.42   | 13.7745  |
| 21 | 8  | 0.00 | -27.36  | -122.90 | -39.98 | -122.90 | 39.98   | 106.6993 |
| 21 | 9  | 0.00 | -0.16   | 40.29   | -      | 40.29   | 126.01  | 108.0180 |
|    |    |      |         | 126.01  |        |         |         |          |
| 21 | 10 | 0.00 | -11.92  | -85.96  | 67.33  | -85.96  | -67.33  | 89.4185  |
| 21 | 11 | 0.00 | -15.71  | -64.64  | -85.24 | -64.64  | 85.24   | 87.8164  |
| 21 | 12 | 0.00 | -234.29 | 18.05   | 5.37   | 18.05   | -5.37   | 136.1385 |
| 21 | 13 | 0.00 | 117.03  | 595.63  | 39.30  | 595.63  | -39.30  | 492.0485 |
| 21 | 14 | 0.00 | 27.63   | -46.49  | 610.91 | -46.49  | -610.91 | 500.5025 |
| 21 | 15 | 0.00 | 743.35  | -70.12  | -24.27 | -70.12  | 24.27   | 433.4285 |
| 21 | 16 | 0.00 | 11.52   | -24.47  | -4.24  | -24.47  | 4.24    | 21.3403  |
| 21 | 17 | 0.00 | -21.12  | 4.06    | -27.32 | 4.06    | 27.32   | 25.6371  |
| 21 | 18 | 0.00 | -154.64 | 12.51   | 3.84   | 12.51   | -3.84   | 89.9185  |
| 21 | 19 | 0.00 | -1.79   | -15.33  | 19.29  | -15.33  | -19.29  | 20.1447  |
| 21 | 20 | 0.00 | -4.70   | -18.65  | -15.56 | -18.65  | 15.56   | 20.0163  |
| 21 | 21 | 0.00 | -8.16   | 1.04    | 0.26   | 1.04    | -0.26   | 4.7918   |
| 21 | 22 | 0.00 | 11.16   | -0.85   | -0.55  | -0.85   | 0.55    | 6.4960   |
| 21 | 23 | 0.00 | -6.56   | -29.93  | -10.14 | -29.93  | 10.14   | 26.0786  |
| 21 | 24 | 0.00 | -0.06   | 10.26   | -30.88 | 10.26   | 30.88   | 26.5687  |
| 21 | 25 | 0.00 | -8.62   | -37.62  | -22.56 | -37.62  | 22.56   | 36.1605  |
| 21 | 26 | 0.00 | -2.20   | -22.93  | 38.95  | -22.93  | -38.95  | 36.9261  |
| 21 | 27 | 0.00 | 71.51   | -7.49   | -2.41  | -7.49   | 2.41    | 41.7832  |
| 21 | 28 | 0.00 | 44.92   | -4.29   | -2.46  | -4.29   | 2.46    | 26.2470  |
| 21 | 29 | 0.00 | -8.81   | -30.32  | -30.51 | -30.32  | 30.51   | 35.4868  |
| 21 | 30 | 0.00 | -3.52   | -30.24  | 30.85  | -30.24  | -30.85  | 35.3306  |
| 22 | 0  | 0.00 | 12.29   | 75.09   | 145.20 | 75.09   | -145.20 | 133.6589 |

|    |    |      |         |         |        |         |         |          |
|----|----|------|---------|---------|--------|---------|---------|----------|
| 22 | 1  | 0.00 | 6.19    | -15.44  | 151.66 | -15.44  | -151.66 | 124.5212 |
| 22 | 2  | 0.00 | -25.99  | -40.33  | 108.46 | -40.33  | -108.46 | 95.6655  |
| 22 | 3  | 0.00 | -22.80  | -100.93 | -49.13 | -100.93 | 49.13   | 92.5942  |
| 22 | 4  | 0.00 | -193.31 | -26.42  | 6.96   | -26.42  | -6.96   | 113.8152 |
| 22 | 5  | 0.00 | -18.34  | -4.09   | -38.24 | -4.09   | 38.24   | 33.1381  |
| 22 | 6  | 0.00 | -18.06  | -60.02  | -56.99 | -60.02  | 56.99   | 68.3781  |
| 22 | 7  | 0.00 | -17.89  | -41.91  | -      | -41.91  | 122.33  | 106.0852 |
|    |    |      |         |         | 122.33 |         |         |          |
| 22 | 8  | 0.00 | 24.37   | 4.69    | -55.54 | 4.69    | 55.54   | 47.6350  |
| 22 | 9  | 0.00 | -108.80 | -43.61  | -4.27  | -43.61  | 4.27    | 72.2901  |
| 22 | 10 | 0.00 | -128.73 | -3.89   | -0.13  | -3.89   | 0.13    | 74.3902  |
| 22 | 11 | 0.00 | 85.02   | -6.34   | 6.48   | -6.34   | -6.48   | 49.6413  |
| 22 | 12 | 0.00 | 10.94   | 11.57   | 113.29 | 11.57   | -113.29 | 93.1963  |
| 22 | 13 | 0.00 | -10.16  | -49.56  | -      | -49.56  | 154.75  | 132.8040 |
|    |    |      |         |         | 154.75 |         |         |          |
| 22 | 14 | 0.00 | -23.69  | -141.62 | 48.62  | -141.62 | -48.62  | 123.0196 |
| 22 | 15 | 0.00 | 10.86   | -7.28   | 123.86 | -7.28   | -123.86 | 101.4996 |
| 22 | 16 | 0.00 | -223.66 | -80.92  | 53.12  | -80.92  | -53.12  | 151.3972 |
| 22 | 17 | 0.00 | -24.93  | 47.23   | 99.41  | 47.23   | -99.41  | 91.0083  |
| 22 | 18 | 0.00 | 25.73   | 106.76  | -21.10 | 106.76  | 21.10   | 90.0886  |
| 22 | 19 | 0.00 | -53.34  | 10.13   | 14.04  | 10.13   | -14.04  | 33.8853  |
| 22 | 20 | 0.00 | 3.72    | 11.12   | -6.94  | 11.12   | 6.94    | 10.9160  |
| 22 | 21 | 0.00 | -2.83   | -19.23  | 7.82   | -19.23  | -7.82   | 17.0284  |
| 22 | 22 | 0.00 | -7.22   | -25.82  | -26.13 | -25.82  | 26.13   | 30.2822  |
| 22 | 23 | 0.00 | -9.43   | -15.17  | -9.46  | -15.17  | 9.46    | 15.5795  |
| 22 | 24 | 0.00 | -50.42  | -2.60   | 17.70  | -2.60   | -17.70  | 32.5693  |
| 22 | 25 | 0.00 | -3.54   | 4.39    | 12.20  | 4.39    | -12.20  | 10.7820  |
| 22 | 26 | 0.00 | -29.78  | -8.45   | 4.64   | -8.45   | -4.64   | 18.9095  |
| 22 | 27 | 0.00 | -0.08   | -1.79   | 2.51   | -1.79   | -2.51   | 2.5176   |
| 22 | 28 | 0.00 | 2.77    | 36.39   | -55.09 | 36.39   | 55.09   | 53.9319  |
| 22 | 29 | 0.00 | -20.42  | -4.79   | -0.51  | -4.79   | 0.51    | 12.4283  |
| 22 | 30 | 0.00 | 16.48   | 2.44    | -6.18  | 2.44    | 6.18    | 10.9527  |
| 23 | 0  | 0.00 | 18.55   | 144.83  | -75.25 | 144.83  | 75.25   | 133.6920 |
| 23 | 1  | 0.00 | 30.13   | 149.02  | 14.20  | 149.02  | -14.20  | 123.4572 |
| 23 | 2  | 0.00 | -23.32  | -103.81 | -44.45 | -103.81 | 44.45   | 93.1816  |
| 23 | 3  | 0.00 | -21.89  | 50.05   | -      | 50.05   | 105.78  | 96.3812  |
|    |    |      |         |         | 105.78 |         |         |          |
| 23 | 4  | 0.00 | 10.60   | -7.56   | -41.32 | -7.56   | 41.32   | 34.8394  |
| 23 | 5  | 0.00 | -176.54 | 57.80   | 2.73   | 57.80   | -2.73   | 112.3432 |
| 23 | 6  | 0.00 | -10.41  | -56.17  | 63.09  | -56.17  | -63.09  | 69.2320  |
| 23 | 7  | 0.00 | -21.15  | -122.11 | 42.90  | -122.11 | -42.90  | 106.3796 |
| 23 | 8  | 0.00 | -86.82  | 62.49   | 10.54  | 62.49   | -10.54  | 72.0414  |
| 23 | 9  | 0.00 | -28.24  | 9.91    | -53.39 | 9.91    | 53.39   | 47.2402  |
| 23 | 10 | 0.00 | 82.46   | -9.25   | -16.66 | -9.25   | 16.66   | 50.0862  |

|    |    |      |         |         |        |         |         |          |
|----|----|------|---------|---------|--------|---------|---------|----------|
| 23 | 11 | 0.00 | 122.76  | -24.30  | -6.20  | -24.30  | 6.20    | 73.7742  |
| 23 | 12 | 0.00 | 22.66   | 109.79  | -11.18 | 109.79  | 11.18   | 91.0515  |
| 23 | 13 | 0.00 | 26.69   | 148.37  | -52.67 | 148.37  | 52.67   | 129.4706 |
| 23 | 14 | 0.00 | -26.91  | -45.20  | -      | -45.20  | 148.84  | 127.9543 |
|    |    |      |         |         |        |         | 148.84  |          |
| 23 | 15 | 0.00 | 29.62   | 121.79  | 11.73  | 121.79  | -11.73  | 101.3544 |
| 23 | 16 | 0.00 | -54.25  | -34.99  | -99.24 | -34.99  | 99.24   | 91.4491  |
| 23 | 17 | 0.00 | 189.26  | -122.65 | 36.36  | -122.65 | -36.36  | 151.1616 |
| 23 | 18 | 0.00 | -9.35   | -20.62  | -      | -20.62  | 109.51  | 91.1458  |
|    |    |      |         |         |        |         | 109.51  |          |
| 23 | 19 | 0.00 | -0.10   | -12.36  | 6.09   | -12.36  | -6.09   | 11.2506  |
| 23 | 20 | 0.00 | 56.68   | 0.06    | 9.86   | 0.06    | -9.86   | 33.7000  |
| 23 | 21 | 0.00 | 3.41    | 7.68    | 19.39  | 7.68    | -19.39  | 17.1419  |
| 23 | 22 | 0.00 | -4.13   | -26.24  | 25.92  | -26.24  | -25.92  | 30.2094  |
| 23 | 23 | 0.00 | -49.26  | 13.75   | -14.69 | 13.75   | 14.69   | 32.8444  |
| 23 | 24 | 0.00 | 2.13    | -15.56  | -9.06  | -15.56  | 9.06    | 14.7528  |
| 23 | 25 | 0.00 | 25.67   | -14.35  | 3.29   | -14.35  | -3.29   | 19.0826  |
| 23 | 26 | 0.00 | -6.79   | -2.96   | -11.73 | -2.96   | 11.73   | 10.6272  |
| 23 | 27 | 0.00 | 0.85    | 2.33    | 1.86   | 2.33    | -1.86   | 2.4832   |
| 23 | 28 | 0.00 | -13.55  | -54.10  | -36.56 | -54.10  | 36.56   | 53.8841  |
| 23 | 29 | 0.00 | -15.81  | 4.82    | -4.17  | 4.82    | 4.17    | 10.5071  |
| 23 | 30 | 0.00 | -17.79  | 6.92    | 3.02   | 6.92    | -3.02   | 11.9791  |
| 24 | 0  | 0.00 | 385.80  | -33.98  | -9.25  | -33.98  | 9.25    | 224.5900 |
| 24 | 1  | 0.00 | 7.16    | 0.50    | 3.40   | 0.50    | -3.40   | 4.9962   |
| 24 | 2  | 0.00 | -30.12  | -116.05 | -      | -116.05 | 103.85  | 128.3382 |
|    |    |      |         |         |        |         | 103.85  |          |
| 24 | 3  | 0.00 | -14.49  | -108.79 | 111.65 | -108.79 | -111.65 | 127.5564 |
| 24 | 4  | 0.00 | 18.31   | 83.18   | 55.38  | 83.18   | -55.38  | 82.2739  |
| 24 | 5  | 0.00 | 2.16    | 56.13   | -86.73 | 56.13   | 86.73   | 84.3603  |
| 24 | 6  | 0.00 | 180.94  | -21.61  | -7.89  | -21.61  | 7.89    | 106.1411 |
| 24 | 7  | 0.00 | 60.12   | -9.37   | -4.38  | -9.37   | 4.38    | 35.7229  |
| 24 | 8  | 0.00 | -0.15   | -1.36   | 4.89   | -1.36   | -4.89   | 4.1451   |
| 24 | 9  | 0.00 | -5.43   | -7.78   | -2.68  | -7.78   | 2.68    | 7.4141   |
| 24 | 10 | 0.00 | 25.31   | 111.27  | 87.35  | 111.27  | -87.35  | 116.4226 |
| 24 | 11 | 0.00 | -5.83   | -87.86  | 112.92 | -87.86  | -112.92 | 116.8683 |
| 24 | 12 | 0.00 | -41.54  | 6.18    | 3.63   | 6.18    | -3.63   | 24.6868  |
| 24 | 13 | 0.00 | 18.39   | 33.20   | 194.00 | 33.20   | -194.00 | 161.0535 |
| 24 | 14 | 0.00 | -38.13  | -202.74 | 33.88  | -202.74 | -33.88  | 169.2696 |
| 24 | 15 | 0.00 | 12.30   | 0.03    | 4.29   | 0.03    | -4.29   | 7.9183   |
| 24 | 16 | 0.00 | -5.90   | -2.17   | 1.32   | -2.17   | -1.32   | 3.9880   |
| 24 | 17 | 0.00 | 0.72    | -0.37   | 5.32   | -0.37   | -5.32   | 4.3741   |
| 24 | 18 | 0.00 | -215.30 | 24.26   | 4.12   | 24.26   | -4.12   | 125.9168 |
| 24 | 19 | 0.00 | 2.86    | 27.68   | -14.03 | 27.68   | 14.03   | 25.3918  |
| 24 | 20 | 0.00 | 5.56    | 14.72   | 27.63  | 14.72   | -27.63  | 25.7624  |

|    |    |      |        |         |        |         |        |          |
|----|----|------|--------|---------|--------|---------|--------|----------|
| 24 | 21 | 0.00 | -7.45  | 0.06    | 0.88   | 0.06    | -0.88  | 4.3611   |
| 24 | 22 | 0.00 | 0.01   | -1.50   | -0.18  | -1.50   | 0.18   | 1.2335   |
| 24 | 23 | 0.00 | 1.55   | 0.97    | 35.61  | 0.97    | -35.61 | 29.1000  |
| 24 | 24 | 0.00 | -8.51  | -36.30  | 1.71   | -36.30  | -1.71  | 30.0757  |
| 24 | 25 | 0.00 | -2.07  | -7.72   | -13.41 | -7.72   | 13.41  | 12.6904  |
| 24 | 26 | 0.00 | -3.16  | -13.97  | 7.94   | -13.97  | -7.94  | 13.2463  |
| 24 | 27 | 0.00 | -6.25  | 0.45    | 0.22   | 0.45    | -0.22  | 3.6315   |
| 24 | 28 | 0.00 | 4.94   | 0.33    | -2.09  | 0.33    | 2.09   | 3.3345   |
| 24 | 29 | 0.00 | 1.00   | 17.09   | -21.42 | 17.09   | 21.42  | 22.3813  |
| 24 | 30 | 0.00 | -4.86  | -20.62  | -17.12 | -20.62  | 17.12  | 22.0619  |
| 25 | 0  | 0.00 | 132.58 | -13.71  | -3.45  | -13.71  | 3.45   | 77.4106  |
| 25 | 1  | 0.00 | 0.68   | 0.90    | -0.53  | 0.90    | 0.53   | 0.9388   |
| 25 | 2  | 0.00 | 6.37   | 47.18   | -51.26 | 47.18   | 51.26  | 57.0019  |
| 25 | 3  | 0.00 | -12.92 | -50.81  | -45.52 | -50.81  | 45.52  | 56.1972  |
| 25 | 4  | 0.00 | -6.02  | -36.87  | -20.65 | -36.87  | 20.65  | 34.6789  |
| 25 | 5  | 0.00 | -1.99  | -20.48  | 36.23  | -20.48  | -36.23 | 34.0002  |
| 25 | 6  | 0.00 | 112.83 | -10.75  | -3.34  | -10.75  | 3.34   | 65.7877  |
| 25 | 7  | 0.00 | -12.13 | 0.49    | 0.22   | 0.49    | -0.22  | 7.0170   |
| 25 | 8  | 0.00 | -0.51  | -17.96  | 30.86  | -17.96  | -30.86 | 29.1551  |
| 25 | 9  | 0.00 | -7.05  | -31.89  | -17.33 | -31.89  | 17.33  | 29.9127  |
| 25 | 10 | 0.00 | -23.41 | -89.92  | -88.44 | -89.92  | 88.44  | 103.8629 |
| 25 | 11 | 0.00 | 12.31  | 87.93   | -91.27 | 87.93   | 91.27  | 103.7229 |
| 25 | 12 | 0.00 | 33.75  | -3.68   | -0.23  | -3.68   | 0.23   | 19.7168  |
| 25 | 13 | 0.00 | -12.84 | -13.75  | -      | -13.75  | 175.84 | 144.2017 |
|    |    |      |        |         | 175.84 |         |        |          |
| 25 | 14 | 0.00 | 33.65  | 174.47  | -16.27 | 174.47  | 16.27  | 144.3853 |
| 25 | 15 | 0.00 | -17.25 | 2.67    | -0.26  | 2.67    | 0.26   | 10.1973  |
| 25 | 16 | 0.00 | -3.16  | -7.81   | -3.74  | -7.81   | 3.74   | 7.3019   |
| 25 | 17 | 0.00 | 1.90   | 2.00    | -8.95  | 2.00    | 8.95   | 7.5678   |
| 25 | 18 | 0.00 | 211.27 | -20.86  | -6.81  | -20.86  | 6.81   | 123.2856 |
| 25 | 19 | 0.00 | -0.38  | -3.33   | 3.35   | -3.33   | -3.35  | 3.8630   |
| 25 | 20 | 0.00 | -1.12  | -3.41   | -3.26  | -3.41   | 3.26   | 3.9058   |
| 25 | 21 | 0.00 | 3.02   | -0.41   | -0.02  | -0.41   | 0.02   | 1.7755   |
| 25 | 22 | 0.00 | 10.90  | -1.08   | -0.27  | -1.08   | 0.27   | 6.3584   |
| 25 | 23 | 0.00 | -0.36  | -0.55   | -11.47 | -0.55   | 11.47  | 9.3783   |
| 25 | 24 | 0.00 | 2.11   | 11.29   | -0.05  | 11.29   | 0.05   | 9.2985   |
| 25 | 25 | 0.00 | -1.31  | 0.66    | -21.69 | 0.66    | 21.69  | 17.7341  |
| 25 | 26 | 0.00 | -4.60  | -21.59  | -0.68  | -21.59  | 0.68   | 17.8357  |
| 25 | 27 | 0.00 | 14.57  | -1.73   | -0.56  | -1.73   | 0.56   | 8.5420   |
| 25 | 28 | 0.00 | 4.93   | -0.95   | -0.35  | -0.95   | 0.35   | 2.9639   |
| 25 | 29 | 0.00 | -3.70  | -11.36  | -23.82 | -11.36  | 23.82  | 21.6531  |
| 25 | 30 | 0.00 | -4.05  | -23.79  | 11.57  | -23.79  | -11.57 | 21.7260  |
| 26 | 0  | 0.00 | -2.69  | -20.52  | 0.55   | -20.52  | -0.55  | 16.8323  |
| 26 | 1  | 0.00 | -35.66 | -169.74 | -35.35 | -169.74 | 35.35  | 143.0550 |

|    |    |      |         |        |        |        |         |          |
|----|----|------|---------|--------|--------|--------|---------|----------|
| 26 | 2  | 0.00 | -11.20  | -31.55 | -49.18 | -31.55 | 49.18   | 48.1442  |
| 26 | 3  | 0.00 | 13.32   | 48.81  | -33.78 | 48.81  | 33.78   | 49.0728  |
| 26 | 4  | 0.00 | -7.83   | 35.38  | 5.35   | 35.38  | -5.35   | 29.5637  |
| 26 | 5  | 0.00 | 141.15  | -17.91 | 27.96  | -17.91 | -27.96  | 85.8844  |
| 26 | 6  | 0.00 | 18.55   | 71.70  | 45.35  | 71.70  | -45.35  | 70.0931  |
| 26 | 7  | 0.00 | -12.67  | -52.06 | -48.69 | -52.06 | 48.69   | 58.6585  |
| 26 | 8  | 0.00 | -145.08 | -6.95  | 48.53  | -6.95  | -48.53  | 92.8352  |
| 26 | 9  | 0.00 | 60.88   | 37.95  | 18.37  | 37.95  | -18.37  | 49.1992  |
| 26 | 10 | 0.00 | 18.64   | -6.37  | -10.69 | -6.37  | 10.69   | 14.8004  |
| 26 | 11 | 0.00 | 50.84   | -13.65 | 1.07   | -13.65 | -1.07   | 31.4093  |
| 26 | 12 | 0.00 | 11.31   | 57.75  | -23.48 | 57.75  | 23.48   | 51.3182  |
| 26 | 13 | 0.00 | -31.25  | 25.60  | -30.41 | 25.60  | 30.41   | 37.1341  |
| 26 | 14 | 0.00 | -9.35   | -27.75 | -21.79 | -27.75 | 21.79   | 29.3096  |
| 26 | 15 | 0.00 | 10.19   | 35.42  | 27.60  | 35.42  | -27.60  | 37.1327  |
| 26 | 16 | 0.00 | -29.71  | -29.27 | -23.13 | -29.27 | 23.13   | 34.9578  |
| 26 | 17 | 0.00 | 43.56   | -29.54 | 30.66  | -29.54 | -30.66  | 42.9060  |
| 26 | 18 | 0.00 | 0.46    | 3.74   | -24.58 | 3.74   | 24.58   | 20.3022  |
| 26 | 19 | 0.00 | 28.33   | -1.46  | 1.48   | -1.46  | -1.48   | 16.4442  |
| 26 | 20 | 0.00 | -2.74   | 2.73   | -1.21  | 2.73   | 1.21    | 2.9064   |
| 26 | 21 | 0.00 | -0.49   | -2.16  | -4.65  | -2.16  | 4.65    | 4.1959   |
| 26 | 22 | 0.00 | 6.95    | 33.29  | 4.50   | 33.29  | -4.50   | 27.7203  |
| 26 | 23 | 0.00 | -48.96  | 21.64  | 17.67  | 21.64  | -17.67  | 36.3232  |
| 26 | 24 | 0.00 | 3.27    | 15.72  | -16.90 | 15.72  | 16.90   | 18.9398  |
| 26 | 25 | 0.00 | 21.00   | 4.51   | -1.98  | 4.51   | 1.98    | 12.7739  |
| 26 | 26 | 0.00 | 7.89    | 0.39   | 6.43   | 0.39   | -6.43   | 6.9581   |
| 26 | 27 | 0.00 | -2.23   | -6.78  | -12.41 | -6.78  | 12.41   | 11.6179  |
| 26 | 28 | 0.00 | 17.39   | 64.51  | 54.04  | 64.51  | -54.04  | 69.4409  |
| 26 | 29 | 0.00 | -3.91   | 6.58   | 12.14  | 6.58   | -12.14  | 11.4984  |
| 26 | 30 | 0.00 | -40.80  | -8.07  | 9.75   | -8.07  | -9.75   | 25.7230  |
| 27 | 0  | 0.00 | 0.12    | 1.38   | 21.29  | 1.38   | -21.29  | 17.4198  |
| 27 | 1  | 0.00 | 3.61    | -36.19 | 170.44 | -36.19 | -170.44 | 142.2815 |
| 27 | 2  | 0.00 | 2.23    | 51.96  | -33.50 | 51.96  | 33.50   | 50.4947  |
| 27 | 3  | 0.00 | 8.26    | 33.94  | 48.38  | 33.94  | -48.38  | 48.4882  |
| 27 | 4  | 0.00 | -138.57 | 9.90   | 35.03  | 9.90   | -35.03  | 85.3461  |
| 27 | 5  | 0.00 | -21.38  | -31.68 | -3.39  | -31.68 | 3.39    | 28.7943  |
| 27 | 6  | 0.00 | 5.07    | 45.44  | -74.08 | 45.44  | 74.08   | 71.0187  |
| 27 | 7  | 0.00 | -7.66   | -48.35 | 54.04  | -48.35 | -54.04  | 59.3710  |
| 27 | 8  | 0.00 | 41.56   | -48.70 | -22.47 | -48.70 | 22.47   | 49.9347  |
| 27 | 9  | 0.00 | 143.07  | -34.70 | 40.73  | -34.70 | -40.73  | 93.4435  |
| 27 | 10 | 0.00 | 55.03   | 4.36   | -4.58  | 4.36   | 4.58    | 32.1884  |
| 27 | 11 | 0.00 | -21.52  | -1.72  | -8.27  | -1.72  | 8.27    | 14.2105  |
| 27 | 12 | 0.00 | -9.55   | -23.35 | -58.77 | -23.35 | 58.77   | 51.9277  |
| 27 | 13 | 0.00 | 4.78    | 30.05  | 22.91  | 30.05  | -22.91  | 30.9763  |
| 27 | 14 | 0.00 | 35.64   | 17.57  | -31.12 | 17.57  | 31.12   | 35.7049  |

|    |    |      |        |         |        |         |         |          |
|----|----|------|--------|---------|--------|---------|---------|----------|
| 27 | 15 | 0.00 | 1.65   | 26.01   | -35.48 | 26.01   | 35.48   | 35.9325  |
| 27 | 16 | 0.00 | 49.81  | 20.83   | -35.68 | 20.83   | 35.68   | 44.3281  |
| 27 | 17 | 0.00 | 14.36  | -35.45  | -24.57 | -35.45  | 24.57   | 36.1800  |
| 27 | 18 | 0.00 | -6.15  | -24.04  | -4.45  | -24.04  | 4.45    | 20.2754  |
| 27 | 19 | 0.00 | -3.45  | -2.17   | 1.19   | -2.17   | -1.19   | 2.8374   |
| 27 | 20 | 0.00 | -27.63 | 3.97    | 2.94   | 3.97    | -2.94   | 16.4542  |
| 27 | 21 | 0.00 | -0.79  | -4.45   | 2.04   | -4.45   | -2.04   | 4.0229   |
| 27 | 22 | 0.00 | -0.63  | 4.94    | -33.24 | 4.94    | 33.24   | 27.4408  |
| 27 | 23 | 0.00 | -0.97  | -16.48  | 16.71  | -16.48  | -16.71  | 19.1709  |
| 27 | 24 | 0.00 | 57.31  | 11.56   | 14.76  | 11.56   | -14.76  | 36.4574  |
| 27 | 25 | 0.00 | -6.72  | 2.30    | 6.68   | 2.30    | -6.68   | 6.9518   |
| 27 | 26 | 0.00 | 18.72  | -8.32   | 0.54   | -8.32   | -0.54   | 12.7732  |
| 27 | 27 | 0.00 | -2.05  | -12.59  | 7.17   | -12.59  | -7.17   | 11.8889  |
| 27 | 28 | 0.00 | 7.00   | 53.81   | -64.72 | 53.81   | 64.72   | 68.8413  |
| 27 | 29 | 0.00 | 36.99  | -17.39  | 7.54   | -17.39  | -7.54   | 26.3742  |
| 27 | 30 | 0.00 | -7.96  | -5.88   | -14.27 | -5.88   | 14.27   | 13.4136  |
| 28 | 0  | 0.00 | -0.82  | -67.64  | 211.75 | -67.64  | -211.75 | 181.5004 |
| 28 | 1  | 0.00 | -8.85  | -23.22  | -69.48 | -23.22  | 69.48   | 60.0322  |
| 28 | 2  | 0.00 | 27.61  | 76.02   | -10.22 | 76.02   | 10.22   | 64.6253  |
| 28 | 3  | 0.00 | 20.96  | 8.61    | 77.35  | 8.61    | -77.35  | 64.6880  |
| 28 | 4  | 0.00 | 67.20  | -24.63  | 4.77   | -24.63  | -4.77   | 43.8734  |
| 28 | 5  | 0.00 | 89.28  | -15.98  | -21.74 | -15.98  | 21.74   | 56.0562  |
| 28 | 6  | 0.00 | 5.19   | 37.78   | -13.46 | 37.78   | 13.46   | 32.8833  |
| 28 | 7  | 0.00 | -45.53 | -216.80 | -35.04 | -216.80 | 35.04   | 181.2301 |
| 28 | 8  | 0.00 | 40.64  | -74.87  | -22.02 | -74.87  | 22.02   | 67.9029  |
| 28 | 9  | 0.00 | 85.67  | -28.53  | 66.20  | -28.53  | -66.20  | 76.8812  |
| 28 | 10 | 0.00 | 59.78  | -8.05   | -24.60 | -8.05   | 24.60   | 40.4705  |
| 28 | 11 | 0.00 | 170.62 | -40.73  | -2.41  | -40.73  | 2.41    | 103.9882 |
| 28 | 12 | 0.00 | 5.73   | 37.18   | -25.08 | 37.18   | 25.08   | 36.7675  |
| 28 | 13 | 0.00 | 60.86  | 105.61  | -42.44 | 105.61  | 42.44   | 99.3532  |
| 28 | 14 | 0.00 | -9.64  | -43.08  | -      | -43.08  | 109.03  | 95.8815  |
|    |    |      |        | 109.03  |        |         |         |          |
| 28 | 15 | 0.00 | 22.71  | 83.67   | 28.95  | 83.67   | -28.95  | 73.4695  |
| 28 | 16 | 0.00 | -44.44 | -41.97  | -67.60 | -41.97  | 67.60   | 69.8508  |
| 28 | 17 | 0.00 | 145.37 | -85.61  | 42.48  | -85.61  | -42.48  | 114.6003 |
| 28 | 18 | 0.00 | -0.22  | 38.70   | -82.23 | 38.70   | 82.23   | 74.2046  |
| 28 | 19 | 0.00 | 16.04  | -1.54   | -2.20  | -1.54   | 2.20    | 9.5167   |
| 28 | 20 | 0.00 | -22.57 | 0.58    | 0.70   | 0.58    | -0.70   | 13.0519  |
| 28 | 21 | 0.00 | -4.98  | -22.40  | -1.52  | -22.40  | 1.52    | 18.5557  |
| 28 | 22 | 0.00 | 2.38   | 12.07   | 0.69   | 12.07   | -0.69   | 9.9664   |
| 28 | 23 | 0.00 | 33.72  | -27.34  | 10.15  | -27.34  | -10.15  | 30.7573  |
| 28 | 24 | 0.00 | -5.13  | 11.72   | 23.78  | 11.72   | -23.78  | 21.8480  |
| 28 | 25 | 0.00 | 23.52  | -4.84   | -5.50  | -4.84   | 5.50    | 14.8385  |
| 28 | 26 | 0.00 | -17.25 | 6.75    | -2.20  | 6.75    | 2.20    | 11.5234  |

|    |    |      |         |        |        |        |         |          |
|----|----|------|---------|--------|--------|--------|---------|----------|
| 28 | 27 | 0.00 | -7.94   | -36.58 | -11.06 | -36.58 | 11.06   | 31.5377  |
| 28 | 28 | 0.00 | 8.05    | 15.71  | 62.11  | 15.71  | -62.11  | 52.5158  |
| 28 | 29 | 0.00 | 21.03   | -5.38  | 20.11  | -5.38  | -20.11  | 20.8884  |
| 28 | 30 | 0.00 | -39.09  | -17.61 | -1.38  | -17.61 | 1.38    | 26.7835  |
| 29 | 0  | 0.00 | 45.37   | 209.88 | 67.20  | 209.88 | -67.20  | 181.8327 |
| 29 | 1  | 0.00 | -11.73  | -67.37 | 24.56  | -67.37 | -24.56  | 58.9390  |
| 29 | 2  | 0.00 | -7.21   | 10.59  | 78.04  | 10.59  | -78.04  | 64.4380  |
| 29 | 3  | 0.00 | -1.49   | -78.85 | 8.88   | -78.85 | -8.88   | 64.7935  |
| 29 | 4  | 0.00 | -94.27  | 1.32   | -17.34 | 1.32   | 17.34   | 56.2485  |
| 29 | 5  | 0.00 | 71.32   | 12.20  | -8.57  | 12.20  | 8.57    | 42.9384  |
| 29 | 6  | 0.00 | -3.59   | -14.01 | -37.45 | -14.01 | 37.45   | 32.7132  |
| 29 | 7  | 0.00 | 6.03    | -35.82 | 220.48 | -35.82 | -220.48 | 182.4147 |
| 29 | 8  | 0.00 | 84.85   | 12.07  | -70.47 | 12.07  | 70.47   | 76.2079  |
| 29 | 9  | 0.00 | -71.58  | -62.67 | -17.84 | -62.67 | 17.84   | 67.3679  |
| 29 | 10 | 0.00 | 180.00  | 6.02   | -7.26  | 6.02   | 7.26    | 104.2080 |
| 29 | 11 | 0.00 | -64.03  | 3.60   | -21.03 | 3.60   | 21.03   | 40.8668  |
| 29 | 12 | 0.00 | -7.93   | -26.31 | -38.46 | -26.31 | 38.46   | 38.3217  |
| 29 | 13 | 0.00 | 19.98   | 39.77  | 109.29 | 39.77  | -109.29 | 95.6576  |
| 29 | 14 | 0.00 | -23.57  | 112.40 | -40.36 | 112.40 | 40.36   | 98.4563  |
| 29 | 15 | 0.00 | -4.13   | 24.74  | -84.64 | 24.74  | 84.64   | 72.0395  |
| 29 | 16 | 0.00 | 166.64  | 55.11  | -54.39 | 55.11  | 54.39   | 115.1226 |
| 29 | 17 | 0.00 | 17.15   | -50.81 | -69.04 | -50.81 | 69.04   | 70.6882  |
| 29 | 18 | 0.00 | -18.01  | -80.21 | -38.59 | -80.21 | 38.59   | 73.4167  |
| 29 | 19 | 0.00 | -22.33  | 3.80   | 0.84   | 3.80   | -0.84   | 13.2781  |
| 29 | 20 | 0.00 | -15.84  | 1.52   | -1.36  | 1.52   | 1.36    | 9.2956   |
| 29 | 21 | 0.00 | 1.21    | -1.57  | 23.06  | -1.57  | -23.06  | 18.8849  |
| 29 | 22 | 0.00 | -1.14   | 0.00   | -11.99 | 0.00   | 11.99   | 9.8119   |
| 29 | 23 | 0.00 | -12.56  | -10.09 | -23.27 | -10.09 | 23.27   | 21.9420  |
| 29 | 24 | 0.00 | -41.65  | -20.10 | 12.26  | -20.10 | -12.26  | 30.7861  |
| 29 | 25 | 0.00 | 18.98   | 3.21   | -3.43  | 3.21   | 3.43    | 11.6100  |
| 29 | 26 | 0.00 | 25.11   | 0.36   | 3.81   | 0.36   | -3.81   | 14.8302  |
| 29 | 27 | 0.00 | 0.38    | -10.98 | 37.06  | -10.98 | -37.06  | 31.5603  |
| 29 | 28 | 0.00 | 11.23   | 60.15  | -16.57 | 60.15  | 16.57   | 51.3527  |
| 29 | 29 | 0.00 | 29.98   | -25.47 | -4.10  | -25.47 | 4.10    | 27.2633  |
| 29 | 30 | 0.00 | 19.89   | 2.57   | -22.86 | 2.57   | 22.86   | 22.0150  |
| 30 | 0  | 0.00 | 22.09   | -1.96  | -0.36  | -1.96  | 0.36    | 12.8570  |
| 30 | 1  | 0.00 | -10.19  | 2.81   | 1.13   | 2.81   | -1.13   | 6.3818   |
| 30 | 2  | 0.00 | 16.63   | 41.15  | 132.95 | 41.15  | -132.95 | 114.0389 |
| 30 | 3  | 0.00 | 22.76   | 130.79 | -43.64 | 130.79 | 43.64   | 113.3416 |
| 30 | 4  | 0.00 | 10.37   | 57.90  | 28.93  | 57.90  | -28.93  | 53.1860  |
| 30 | 5  | 0.00 | 1.33    | 29.72  | -58.22 | 29.72  | 58.22   | 53.3775  |
| 30 | 6  | 0.00 | -146.23 | 12.49  | 3.89   | 12.49  | -3.89   | 85.0989  |
| 30 | 7  | 0.00 | 6.15    | -0.85  | 0.39   | -0.85  | -0.39   | 3.6319   |
| 30 | 8  | 0.00 | 1.10    | -5.50  | 26.63  | -5.50  | -26.63  | 22.2113  |



|    |    |      |        |        |        |        |        |         |
|----|----|------|--------|--------|--------|--------|--------|---------|
| 30 | 9  | 0.00 | -6.96  | -26.76 | -6.19  | -26.76 | 6.19   | 22.7835 |
| 30 | 10 | 0.00 | -9.63  | -36.90 | -41.59 | -36.90 | 41.59  | 45.7362 |
| 30 | 11 | 0.00 | 5.79   | 41.35  | -37.51 | 41.35  | 37.51  | 45.7062 |
| 30 | 12 | 0.00 | 74.91  | -7.51  | -2.00  | -7.51  | 2.00   | 43.7123 |
| 30 | 13 | 0.00 | -5.37  | -17.57 | -44.40 | -17.57 | 44.40  | 39.1108 |
| 30 | 14 | 0.00 | 7.56   | 45.26  | -18.32 | 45.26  | 18.32  | 40.1054 |
| 30 | 15 | 0.00 | -14.98 | 1.58   | 0.03   | 1.58   | -0.03  | 8.7444  |
| 30 | 16 | 0.00 | -0.02  | 0.83   | -5.49  | 0.83   | 5.49   | 4.5335  |
| 30 | 17 | 0.00 | 1.52   | 4.95   | -0.01  | 4.95   | 0.01   | 4.1358  |
| 30 | 18 | 0.00 | 34.09  | -3.52  | -1.12  | -3.52  | 1.12   | 19.9116 |
| 30 | 19 | 0.00 | -0.57  | -1.34  | 0.14   | -1.34  | -0.14  | 1.1482  |
| 30 | 20 | 0.00 | 0.30   | -0.10  | -1.50  | -0.10  | 1.50   | 1.2396  |
| 30 | 21 | 0.00 | 3.47   | -0.35  | 0.09   | -0.35  | -0.09  | 2.0250  |
| 30 | 22 | 0.00 | 18.82  | -1.89  | -0.70  | -1.89  | 0.70   | 10.9896 |
| 30 | 23 | 0.00 | 0.36   | 8.72   | -20.84 | 8.72   | 20.84  | 18.4465 |
| 30 | 24 | 0.00 | 4.09   | 20.01  | 8.56   | 20.01  | -8.56  | 17.9265 |
| 30 | 25 | 0.00 | -1.33  | -4.43  | -12.73 | -4.43  | 12.73  | 11.0321 |
| 30 | 26 | 0.00 | -1.92  | -12.53 | 4.25   | -12.53 | -4.25  | 10.8599 |
| 30 | 27 | 0.00 | -38.67 | 3.64   | 1.37   | 3.64   | -1.37  | 22.5508 |
| 30 | 28 | 0.00 | -17.56 | 1.12   | 0.30   | 1.12   | -0.30  | 10.1824 |
| 30 | 29 | 0.00 | -2.48  | -17.25 | 14.66  | -17.25 | -14.66 | 18.5392 |
| 30 | 30 | 0.00 | 3.86   | 14.55  | 17.08  | 14.55  | -17.08 | 18.4550 |

**Table S4.** The TDMs of  $\text{Alq}_3$  calculated at the level of B3LYP/def2-SVP.

| State | $\mu_x/\text{a.u.}$ | $\mu_y/\text{a.u.}$ | $\mu_z/\text{a.u.}$ | u/debye  |
|-------|---------------------|---------------------|---------------------|----------|
| 1     | -0.23502            | -0.05789            | -0.08222            | 0.649778 |
| 2     | 0.31573             | 0.2522              | 0.03001             | 1.030028 |
| 3     | -0.55753            | -0.72673            | 0.07603             | 2.336373 |
| 4     | 0.4992              | -0.48615            | 0.23295             | 1.86767  |
| 5     | 0.43305             | 0.06924             | -0.0007             | 1.114805 |
| 6     | 0.43649             | 0.10109             | 0.13283             | 1.187933 |
| 7     | -0.28424            | -0.35033            | 0.0751              | 1.162559 |
| 8     | -0.04814            | 0.39963             | -0.10608            | 1.058126 |
| 9     | -0.03936            | -0.07154            | 0.08299             | 0.296009 |
| 10    | 0.16951             | -0.2791             | 0.1285              | 0.892057 |
| 11    | 0.04746             | -0.1309             | -0.36876            | 1.00198  |
| 12    | -0.25409            | -0.05021            | 0.00781             | 0.658667 |
| 13    | 0.09857             | -0.06913            | 0.44409             | 1.169624 |
| 14    | -0.27162            | 0.28709             | -0.02546            | 1.006741 |
| 15    | -0.00432            | -0.06384            | -0.30511            | 0.792476 |
| 16    | 0.0775              | 0.01633             | 0.01576             | 0.205258 |
| 17    | 0.08722             | 0.07863             | 0.00786             | 0.299158 |

|    |          |          |          |          |
|----|----------|----------|----------|----------|
| 18 | -0.01903 | -0.00759 | 0.07955  | 0.208847 |
| 19 | 0.01578  | 0.25693  | -0.05649 | 0.669903 |
| 20 | -0.01763 | 0.02202  | -0.23452 | 0.600418 |
| 21 | 0.00341  | 0.02441  | 0.02132  | 0.082762 |
| 22 | 0.05306  | -0.09645 | 0.02836  | 0.288939 |
| 23 | 0.02393  | 0.03603  | 0.00119  | 0.109925 |
| 24 | 0.05037  | 0.00246  | -0.00321 | 0.128365 |
| 25 | -0.10998 | -0.09001 | -0.28657 | 0.813122 |
| 26 | -0.01305 | -0.04431 | -0.15    | 0.39894  |
| 27 | 0.04088  | 0.06806  | -0.04622 | 0.233532 |
| 28 | 0.07674  | -0.12634 | -0.08879 | 0.438302 |
| 29 | 0.08388  | 0.00909  | -0.03093 | 0.228356 |
| 30 | -0.0155  | -0.11078 | -0.05865 | 0.321038 |

**Table S5.** The SOC<sub>s</sub> of Alq<sub>3</sub> calculated at the level of B3LYP/def2-SVP.

| Roots          |                | <T <sub>n</sub>  HSO S <sub>n</sub> > elements (Rm, Im) /cm <sup>-1</sup> |       |       |       |       |       | SOC/cm <sup>-1</sup> |
|----------------|----------------|---------------------------------------------------------------------------|-------|-------|-------|-------|-------|----------------------|
| T <sub>n</sub> | S <sub>n</sub> | Ms=0                                                                      | Ms=0  | Ms=1  | Ms=-1 | Ms=1  | Ms=1  |                      |
| 1              | 0              | 0.00                                                                      | 0.20  | 0.06  | -0.07 | 0.06  | 0.07  | 0.14                 |
| 1              | 1              | 0.00                                                                      | -0.40 | 0.35  | 0.79  | 0.35  | -0.79 | 0.74                 |
| 1              | 2              | 0.00                                                                      | -0.12 | 0.19  | 0.21  | 0.19  | -0.21 | 0.24                 |
| 1              | 3              | 0.00                                                                      | -0.04 | 0.03  | -0.09 | 0.03  | 0.09  | 0.08                 |
| 1              | 4              | 0.00                                                                      | 0.02  | 0.20  | -0.01 | 0.2   | 0.01  | 0.16                 |
| 1              | 5              | 0.00                                                                      | -0.33 | -0.43 | 0.5   | -0.43 | -0.5  | 0.57                 |
| 1              | 6              | 0.00                                                                      | -0.45 | -0.45 | 0.92  | -0.45 | -0.92 | 0.88                 |
| 1              | 7              | 0.00                                                                      | -0.78 | -0.65 | 1.64  | -0.65 | -1.64 | 1.51                 |
| 1              | 8              | 0.00                                                                      | 0.06  | -0.70 | 0.58  | -0.7  | -0.58 | 0.74                 |
| 1              | 9              | 0.00                                                                      | -0.52 | 0.50  | 0.2   | 0.5   | -0.2  | 0.53                 |
| 1              | 10             | 0.00                                                                      | -0.01 | -0.04 | -0.1  | -0.04 | 0.1   | 0.09                 |
| 1              | 11             | 0.00                                                                      | -0.01 | -0.04 | -0.05 | -0.04 | 0.05  | 0.05                 |
| 1              | 12             | 0.00                                                                      | -0.03 | -0.04 | 0.09  | -0.04 | -0.09 | 0.08                 |
| 1              | 13             | 0.00                                                                      | 0.01  | 0.01  | 0     | 0.01  | 0     | 0.01                 |
| 1              | 14             | 0.00                                                                      | -0.01 | -0.01 | -0.05 | -0.01 | 0.05  | 0.04                 |
| 1              | 15             | 0.00                                                                      | 0.00  | 0.02  | 0.03  | 0.02  | -0.03 | 0.03                 |
| 1              | 16             | 0.00                                                                      | -0.02 | 0.00  | 0.02  | 0     | -0.02 | 0.02                 |
| 1              | 17             | 0.00                                                                      | 0.05  | 0.12  | -0.15 | 0.12  | 0.15  | 0.16                 |
| 1              | 18             | 0.00                                                                      | 0.02  | -0.06 | -0.03 | -0.06 | 0.03  | 0.06                 |
| 1              | 19             | 0.00                                                                      | -0.07 | -0.02 | -0.01 | -0.02 | 0.01  | 0.04                 |
| 1              | 20             | 0.00                                                                      | -0.01 | -0.05 | 0.04  | -0.05 | -0.04 | 0.05                 |
| 1              | 21             | 0.00                                                                      | 0.11  | 0.65  | -0.2  | 0.65  | 0.2   | 0.56                 |
| 1              | 22             | 0.00                                                                      | 0.13  | 0.34  | -0.08 | 0.34  | 0.08  | 0.29                 |
| 1              | 23             | 0.00                                                                      | 0.88  | 2.91  | -0.75 | 2.91  | 0.75  | 2.51                 |

|   |    |      |       |        |       |        |       |       |
|---|----|------|-------|--------|-------|--------|-------|-------|
| 1 | 24 | 0.00 | -3.05 | -13.01 | 4.36  | -13.01 | -4.36 | 11.34 |
| 1 | 25 | 0.00 | -0.01 | -0.03  | 0.05  | -0.03  | -0.05 | 0.05  |
| 1 | 26 | 0.00 | -0.07 | -0.28  | -0.21 | -0.28  | 0.21  | 0.29  |
| 1 | 27 | 0.00 | 0.46  | 2.84   | -1.07 | 2.84   | 1.07  | 2.49  |
| 1 | 28 | 0.00 | 0.15  | 0.64   | -0.33 | 0.64   | 0.33  | 0.59  |
| 1 | 29 | 0.00 | 0.07  | 0.40   | -0.23 | 0.4    | 0.23  | 0.38  |
| 1 | 30 | 0.00 | 0.15  | 1.39   | -1.18 | 1.39   | 1.18  | 1.49  |
| 2 | 0  | 0.00 | -0.04 | 0.06   | 0.03  | 0.06   | -0.03 | 0.06  |
| 2 | 1  | 0.00 | 0.71  | -0.20  | -0.62 | -0.2   | 0.62  | 0.67  |
| 2 | 2  | 0.00 | 0.65  | -0.16  | -0.53 | -0.16  | 0.53  | 0.59  |
| 2 | 3  | 0.00 | -0.23 | 0.19   | -0.03 | 0.19   | 0.03  | 0.21  |
| 2 | 4  | 0.00 | -0.17 | -0.08  | -0.09 | -0.08  | 0.09  | 0.14  |
| 2 | 5  | 0.00 | -0.37 | 0.18   | -0.02 | 0.18   | 0.02  | 0.26  |
| 2 | 6  | 0.00 | 0.41  | -0.05  | -0.16 | -0.05  | 0.16  | 0.27  |
| 2 | 7  | 0.00 | 0.42  | -0.31  | -0.35 | -0.31  | 0.35  | 0.45  |
| 2 | 8  | 0.00 | -0.96 | 0.36   | 0.29  | 0.36   | -0.29 | 0.67  |
| 2 | 9  | 0.00 | -0.43 | -0.38  | -0.46 | -0.38  | 0.46  | 0.55  |
| 2 | 10 | 0.00 | 0.02  | -0.04  | -0.04 | -0.04  | 0.04  | 0.05  |
| 2 | 11 | 0.00 | 0.16  | 0.04   | 0.02  | 0.04   | -0.02 | 0.10  |
| 2 | 12 | 0.00 | 0.04  | -0.03  | -0.02 | -0.03  | 0.02  | 0.04  |
| 2 | 13 | 0.00 | -0.21 | -0.08  | -0.05 | -0.08  | 0.05  | 0.14  |
| 2 | 14 | 0.00 | -0.01 | -0.05  | -0.02 | -0.05  | 0.02  | 0.04  |
| 2 | 15 | 0.00 | 0.13  | 0.05   | 0.12  | 0.05   | -0.12 | 0.13  |
| 2 | 16 | 0.00 | -0.16 | 0.20   | -0.03 | 0.2    | 0.03  | 0.19  |
| 2 | 17 | 0.00 | -0.02 | -0.02  | 0     | -0.02  | 0     | 0.02  |
| 2 | 18 | 0.00 | 0.47  | 0.08   | 0.11  | 0.08   | -0.11 | 0.29  |
| 2 | 19 | 0.00 | 0.03  | 0.12   | -0.06 | 0.12   | 0.06  | 0.11  |
| 2 | 20 | 0.00 | -1.31 | -0.89  | -0.78 | -0.89  | 0.78  | 1.23  |
| 2 | 21 | 0.00 | -7.53 | -7.76  | -4.52 | -7.76  | 4.52  | 8.52  |
| 2 | 22 | 0.00 | -0.98 | -0.52  | -0.68 | -0.52  | 0.68  | 0.90  |
| 2 | 23 | 0.00 | -9.26 | -5.60  | -6.32 | -5.6   | 6.32  | 8.72  |
| 2 | 24 | 0.00 | -3.00 | -2.12  | -1.83 | -2.12  | 1.83  | 2.87  |
| 2 | 25 | 0.00 | 1.15  | 0.86   | 0.8   | 0.86   | -0.8  | 1.17  |
| 2 | 26 | 0.00 | -0.08 | -0.09  | -0.02 | -0.09  | 0.02  | 0.09  |
| 2 | 27 | 0.00 | -1.78 | -1.91  | -0.74 | -1.91  | 0.74  | 1.96  |
| 2 | 28 | 0.00 | 0.02  | 0.00   | -0.03 | 0      | 0.03  | 0.03  |
| 2 | 29 | 0.00 | -0.06 | 0.54   | -0.85 | 0.54   | 0.85  | 0.82  |
| 2 | 30 | 0.00 | 1.53  | 1.25   | 0.9   | 1.25   | -0.9  | 1.54  |
| 3 | 0  | 0.00 | 0.37  | -0.04  | 0.24  | -0.04  | -0.24 | 0.29  |
| 3 | 1  | 0.00 | 0.69  | 0.47   | -0.98 | 0.47   | 0.98  | 0.97  |
| 3 | 2  | 0.00 | -0.93 | 0.56   | -0.58 | 0.56   | 0.58  | 0.85  |
| 3 | 3  | 0.00 | -0.17 | 0.51   | -0.85 | 0.51   | 0.85  | 0.82  |
| 3 | 4  | 0.00 | 0.11  | -0.17  | 0.39  | -0.17  | -0.39 | 0.35  |
| 3 | 5  | 0.00 | 0.27  | 0.34   | -1.03 | 0.34   | 1.03  | 0.90  |

|   |    |      |       |       |       |       |       |      |
|---|----|------|-------|-------|-------|-------|-------|------|
| 3 | 6  | 0.00 | 0.67  | 0.27  | -0.77 | 0.27  | 0.77  | 0.77 |
| 3 | 7  | 0.00 | -0.25 | -0.06 | 0     | -0.06 | 0     | 0.15 |
| 3 | 8  | 0.00 | 0.64  | -0.06 | -0.54 | -0.06 | 0.54  | 0.58 |
| 3 | 9  | 0.00 | 0.22  | 0.09  | 0.02  | 0.09  | -0.02 | 0.15 |
| 3 | 10 | 0.00 | -0.18 | -0.05 | 0.02  | -0.05 | -0.02 | 0.11 |
| 3 | 11 | 0.00 | 0.25  | 0.03  | -0.02 | 0.03  | 0.02  | 0.15 |
| 3 | 12 | 0.00 | 0.10  | 0.03  | 0.09  | 0.03  | -0.09 | 0.10 |
| 3 | 13 | 0.00 | 0.00  | 0.05  | -0.07 | 0.05  | 0.07  | 0.07 |
| 3 | 14 | 0.00 | 0.00  | -0.02 | -0.02 | -0.02 | 0.02  | 0.02 |
| 3 | 15 | 0.00 | 0.00  | -0.13 | 0.07  | -0.13 | -0.07 | 0.12 |
| 3 | 16 | 0.00 | 0.05  | -0.06 | 0.05  | -0.06 | -0.05 | 0.07 |
| 3 | 17 | 0.00 | 0.07  | 0.05  | -0.02 | 0.05  | 0.02  | 0.06 |
| 3 | 18 | 0.00 | -0.27 | 0.16  | -0.37 | 0.16  | 0.37  | 0.36 |
| 3 | 19 | 0.00 | -0.10 | 0.05  | -0.13 | 0.05  | 0.13  | 0.13 |
| 3 | 20 | 0.00 | 0.40  | -0.02 | 0.51  | -0.02 | -0.51 | 0.48 |
| 3 | 21 | 0.00 | 6.80  | -1.27 | 6.68  | -1.27 | -6.68 | 6.80 |
| 3 | 22 | 0.00 | -0.48 | 0.61  | -0.83 | 0.61  | 0.83  | 0.89 |
| 3 | 23 | 0.00 | -5.46 | 4.51  | -5.92 | 4.51  | 5.92  | 6.85 |
| 3 | 24 | 0.00 | -0.14 | 0.29  | -0.02 | 0.29  | 0.02  | 0.25 |
| 3 | 25 | 0.00 | -0.02 | -0.20 | 0.06  | -0.2  | -0.06 | 0.17 |
| 3 | 26 | 0.00 | 0.33  | -0.23 | 0.37  | -0.23 | -0.37 | 0.40 |
| 3 | 27 | 0.00 | 4.51  | -2.42 | 4.97  | -2.42 | -4.97 | 5.21 |
| 3 | 28 | 0.00 | 0.02  | 0.02  | 0.03  | 0.02  | -0.03 | 0.03 |
| 3 | 29 | 0.00 | -3.12 | 4.56  | -4.78 | 4.56  | 4.78  | 5.69 |
| 3 | 30 | 0.00 | -1.95 | 0.14  | -0.93 | 0.14  | 0.93  | 1.36 |
| 4 | 0  | 0.00 | 0.01  | 0.11  | 0.95  | 0.11  | -0.95 | 0.78 |
| 4 | 1  | 0.00 | -0.28 | -0.29 | 0.46  | -0.29 | -0.46 | 0.47 |
| 4 | 2  | 0.00 | 0.82  | 0.98  | -2.13 | 0.98  | 2.13  | 1.97 |
| 4 | 3  | 0.00 | -1.40 | 0.35  | 1.02  | 0.35  | -1.02 | 1.20 |
| 4 | 4  | 0.00 | -0.08 | 0.61  | 0.05  | 0.61  | -0.05 | 0.50 |
| 4 | 5  | 0.00 | -1.02 | -0.28 | 0.14  | -0.28 | -0.14 | 0.64 |
| 4 | 6  | 0.00 | -0.09 | 0.09  | 0.06  | 0.09  | -0.06 | 0.10 |
| 4 | 7  | 0.00 | 0.11  | -0.03 | -0.12 | -0.03 | 0.12  | 0.12 |
| 4 | 8  | 0.00 | -0.10 | 0.02  | 0.04  | 0.02  | -0.04 | 0.07 |
| 4 | 9  | 0.00 | -0.02 | -0.04 | 0     | -0.04 | 0     | 0.03 |
| 4 | 10 | 0.00 | -0.24 | -0.03 | 0.04  | -0.03 | -0.04 | 0.14 |
| 4 | 11 | 0.00 | 0.01  | -0.09 | 0.04  | -0.09 | -0.04 | 0.08 |
| 4 | 12 | 0.00 | -0.17 | 0.15  | -0.07 | 0.15  | 0.07  | 0.17 |
| 4 | 13 | 0.00 | -0.15 | 0.02  | -0.01 | 0.02  | 0.01  | 0.09 |
| 4 | 14 | 0.00 | -0.11 | -0.11 | -0.05 | -0.11 | 0.05  | 0.12 |
| 4 | 15 | 0.00 | -0.06 | 0.07  | -0.04 | 0.07  | 0.04  | 0.07 |
| 4 | 16 | 0.00 | 0.02  | 0.03  | -0.01 | 0.03  | 0.01  | 0.03 |
| 4 | 17 | 0.00 | 0.01  | -0.03 | 0.03  | -0.03 | -0.03 | 0.04 |
| 4 | 18 | 0.00 | -0.14 | -0.16 | -0.05 | -0.16 | 0.05  | 0.16 |

|   |    |      |       |       |       |       |       |       |
|---|----|------|-------|-------|-------|-------|-------|-------|
| 4 | 19 | 0.00 | -0.06 | -0.09 | -0.01 | -0.09 | 0.01  | 0.08  |
| 4 | 20 | 0.00 | 0.10  | 0.05  | 0.36  | 0.05  | -0.36 | 0.30  |
| 4 | 21 | 0.00 | 2.91  | 5.99  | -0.12 | 5.99  | 0.12  | 5.17  |
| 4 | 22 | 0.00 | 0.07  | -0.24 | 0.33  | -0.24 | -0.33 | 0.34  |
| 4 | 23 | 0.00 | -0.95 | -4.30 | 2.55  | -4.3  | -2.55 | 4.12  |
| 4 | 24 | 0.00 | -1.02 | -1.37 | 0.39  | -1.37 | -0.39 | 1.30  |
| 4 | 25 | 0.00 | 0.74  | 1.46  | -0.54 | 1.46  | 0.54  | 1.34  |
| 4 | 26 | 0.00 | -0.26 | -0.19 | -0.05 | -0.19 | 0.05  | 0.22  |
| 4 | 27 | 0.00 | -3.97 | -3.98 | -0.21 | -3.98 | 0.21  | 3.98  |
| 4 | 28 | 0.00 | -0.05 | 0.17  | -0.2  | 0.17  | 0.2   | 0.22  |
| 4 | 29 | 0.00 | 0.50  | 12.75 | -6.81 | 12.75 | 6.81  | 11.81 |
| 4 | 30 | 0.00 | 0.75  | -0.74 | 1.42  | -0.74 | -1.42 | 1.38  |
| 5 | 0  | 0.00 | 2.48  | -0.24 | -1.3  | -0.24 | 1.3   | 1.79  |
| 5 | 1  | 0.00 | -0.37 | 1.06  | -1.63 | 1.06  | 1.63  | 1.60  |
| 5 | 2  | 0.00 | 0.21  | -0.03 | -0.03 | -0.03 | 0.03  | 0.13  |
| 5 | 3  | 0.00 | 0.11  | -0.17 | 0.28  | -0.17 | -0.28 | 0.27  |
| 5 | 4  | 0.00 | 0.73  | 0.07  | -0.62 | 0.07  | 0.62  | 0.66  |
| 5 | 5  | 0.00 | 0.20  | -0.38 | 0.4   | -0.38 | -0.4  | 0.47  |
| 5 | 6  | 0.00 | 0.82  | -0.83 | 0.73  | -0.83 | -0.73 | 1.02  |
| 5 | 7  | 0.00 | -0.35 | 0.02  | -0.85 | 0.02  | 0.85  | 0.72  |
| 5 | 8  | 0.00 | 0.37  | -0.42 | -0.24 | -0.42 | 0.24  | 0.45  |
| 5 | 9  | 0.00 | 0.19  | -0.06 | 0.15  | -0.06 | -0.15 | 0.17  |
| 5 | 10 | 0.00 | 0.11  | -0.03 | 0.08  | -0.03 | -0.08 | 0.09  |
| 5 | 11 | 0.00 | 0.14  | 0.01  | 0.03  | 0.01  | -0.03 | 0.08  |
| 5 | 12 | 0.00 | 0.11  | 0.05  | -0.04 | 0.05  | 0.04  | 0.08  |
| 5 | 13 | 0.00 | -0.12 | 0.03  | -0.12 | 0.03  | 0.12  | 0.12  |
| 5 | 14 | 0.00 | -0.01 | 0.08  | -0.07 | 0.08  | 0.07  | 0.09  |
| 5 | 15 | 0.00 | 0.04  | -0.09 | -0.03 | -0.09 | 0.03  | 0.08  |
| 5 | 16 | 0.00 | 0.05  | -0.03 | 0.01  | -0.03 | -0.01 | 0.04  |
| 5 | 17 | 0.00 | 0.04  | -0.12 | 0.17  | -0.12 | -0.17 | 0.17  |
| 5 | 18 | 0.00 | -0.12 | 0.34  | -0.46 | 0.34  | 0.46  | 0.47  |
| 5 | 19 | 0.00 | -0.06 | 0.08  | -0.11 | 0.08  | 0.11  | 0.12  |
| 5 | 20 | 0.00 | 0.22  | -0.33 | 0.42  | -0.33 | -0.42 | 0.45  |
| 5 | 21 | 0.00 | 3.56  | -5.70 | 6.5   | -5.7  | -6.5  | 7.35  |
| 5 | 22 | 0.00 | 0.27  | 0.09  | 0.25  | 0.09  | -0.25 | 0.27  |
| 5 | 23 | 0.00 | -0.13 | 3.71  | -1.78 | 3.71  | 1.78  | 3.36  |
| 5 | 24 | 0.00 | -1.62 | 1.51  | -2.03 | 1.51  | 2.03  | 2.27  |
| 5 | 25 | 0.00 | 0.64  | -1.18 | 1.29  | -1.18 | -1.29 | 1.47  |
| 5 | 26 | 0.00 | -0.48 | 0.17  | -0.49 | 0.17  | 0.49  | 0.51  |
| 5 | 27 | 0.00 | -6.21 | 3.10  | -6.9  | 3.1   | 6.9   | 7.14  |
| 5 | 28 | 0.00 | -0.28 | -0.02 | -0.15 | -0.02 | 0.15  | 0.20  |
| 5 | 29 | 0.00 | -5.11 | -2.09 | -2.92 | -2.09 | 2.92  | 4.16  |
| 5 | 30 | 0.00 | 1.89  | 0.11  | 0.36  | 0.11  | -0.36 | 1.13  |
| 6 | 0  | 0.00 | 1.09  | -0.63 | 0.97  | -0.63 | -0.97 | 1.13  |

|   |    |      |       |       |       |       |       |      |
|---|----|------|-------|-------|-------|-------|-------|------|
| 6 | 1  | 0.00 | 1.14  | 0.27  | -0.65 | 0.27  | 0.65  | 0.87 |
| 6 | 2  | 0.00 | 0.80  | -0.11 | 0.08  | -0.11 | -0.08 | 0.48 |
| 6 | 3  | 0.00 | -0.28 | -0.78 | 1.05  | -0.78 | -1.05 | 1.08 |
| 6 | 4  | 0.00 | 0.37  | 0.18  | -0.57 | 0.18  | 0.57  | 0.53 |
| 6 | 5  | 0.00 | -0.02 | -0.05 | 0.36  | -0.05 | -0.36 | 0.30 |
| 6 | 6  | 0.00 | 0.96  | 0.67  | -1.7  | 0.67  | 1.7   | 1.59 |
| 6 | 7  | 0.00 | -0.20 | -0.83 | 0.69  | -0.83 | -0.69 | 0.89 |
| 6 | 8  | 0.00 | -0.70 | 0.20  | 0.29  | 0.2   | -0.29 | 0.50 |
| 6 | 9  | 0.00 | -0.48 | 0.37  | 0.16  | 0.37  | -0.16 | 0.43 |
| 6 | 10 | 0.00 | -0.09 | -0.02 | -0.05 | -0.02 | 0.05  | 0.07 |
| 6 | 11 | 0.00 | -0.07 | -0.06 | 0.06  | -0.06 | -0.06 | 0.08 |
| 6 | 12 | 0.00 | 0.04  | 0.02  | 0     | 0.02  | 0     | 0.03 |
| 6 | 13 | 0.00 | -0.03 | -0.04 | -0.05 | -0.04 | 0.05  | 0.06 |
| 6 | 14 | 0.00 | -0.06 | -0.12 | 0.13  | -0.12 | -0.13 | 0.15 |
| 6 | 15 | 0.00 | 0.03  | -0.09 | 0.06  | -0.09 | -0.06 | 0.09 |
| 6 | 16 | 0.00 | 0.03  | 0.01  | 0     | 0.01  | 0     | 0.02 |
| 6 | 17 | 0.00 | 0.05  | 0.02  | -0.03 | 0.02  | 0.03  | 0.04 |
| 6 | 18 | 0.00 | -0.04 | 0.08  | -0.14 | 0.08  | 0.14  | 0.13 |
| 6 | 19 | 0.00 | -0.07 | 0.00  | 0.01  | 0     | -0.01 | 0.04 |
| 6 | 20 | 0.00 | 0.14  | -0.03 | 0.04  | -0.03 | -0.04 | 0.09 |
| 6 | 21 | 0.00 | 1.62  | -0.52 | 1.83  | -0.52 | -1.83 | 1.81 |
| 6 | 22 | 0.00 | -0.17 | -0.65 | 0.34  | -0.65 | -0.34 | 0.61 |
| 6 | 23 | 0.00 | -1.07 | -3.79 | 1.04  | -3.79 | -1.04 | 3.27 |
| 6 | 24 | 0.00 | -0.65 | 1.37  | -1.25 | 1.37  | 1.25  | 1.56 |
| 6 | 25 | 0.00 | 0.37  | -0.15 | 0.23  | -0.15 | -0.23 | 0.31 |
| 6 | 26 | 0.00 | -0.02 | 0.73  | -0.42 | 0.73  | 0.42  | 0.69 |
| 6 | 27 | 0.00 | -0.37 | 8.84  | -4.91 | 8.84  | 4.91  | 8.26 |
| 6 | 28 | 0.00 | -0.03 | 0.35  | -0.26 | 0.35  | 0.26  | 0.36 |
| 6 | 29 | 0.00 | -0.69 | 4.78  | -3.21 | 4.78  | 3.21  | 4.72 |
| 6 | 30 | 0.00 | 0.51  | -2.63 | 3.39  | -2.63 | -3.39 | 3.52 |
| 7 | 0  | 0.00 | -2.21 | 0.75  | 1.34  | 0.75  | -1.34 | 1.79 |
| 7 | 1  | 0.00 | 0.36  | -0.08 | -0.3  | -0.08 | 0.3   | 0.33 |
| 7 | 2  | 0.00 | 0.13  | 0.02  | -0.02 | 0.02  | 0.02  | 0.08 |
| 7 | 3  | 0.00 | 0.99  | -0.17 | -0.64 | -0.17 | 0.64  | 0.79 |
| 7 | 4  | 0.00 | 0.91  | -0.15 | -0.18 | -0.15 | 0.18  | 0.56 |
| 7 | 5  | 0.00 | 0.71  | -0.30 | -0.16 | -0.3  | 0.16  | 0.50 |
| 7 | 6  | 0.00 | 0.78  | -0.13 | -0.52 | -0.13 | 0.52  | 0.63 |
| 7 | 7  | 0.00 | 0.03  | 0.09  | -0.12 | 0.09  | 0.12  | 0.12 |
| 7 | 8  | 0.00 | -0.38 | 0.10  | 0.04  | 0.1   | -0.04 | 0.24 |
| 7 | 9  | 0.00 | -0.09 | 0.30  | -0.25 | 0.3   | 0.25  | 0.32 |
| 7 | 10 | 0.00 | -0.12 | 0.07  | 0.06  | 0.07  | -0.06 | 0.10 |
| 7 | 11 | 0.00 | -0.07 | 0.06  | 0.1   | 0.06  | -0.1  | 0.10 |
| 7 | 12 | 0.00 | -0.07 | 0.00  | -0.05 | 0     | 0.05  | 0.06 |
| 7 | 13 | 0.00 | -0.09 | -0.01 | 0.06  | -0.01 | -0.06 | 0.07 |

---

|   |    |      |        |        |       |        |       |       |
|---|----|------|--------|--------|-------|--------|-------|-------|
| 7 | 14 | 0.00 | 0.00   | -0.01  | 0.12  | -0.01  | -0.12 | 0.10  |
| 7 | 15 | 0.00 | 0.19   | 0.01   | 0.08  | 0.01   | -0.08 | 0.13  |
| 7 | 16 | 0.00 | 0.01   | 0.04   | 0.01  | 0.04   | -0.01 | 0.03  |
| 7 | 17 | 0.00 | -0.05  | 0.00   | -0.02 | 0      | 0.02  | 0.03  |
| 7 | 18 | 0.00 | 0.16   | 0.06   | 0.06  | 0.06   | -0.06 | 0.12  |
| 7 | 19 | 0.00 | 0.04   | -0.07  | 0.06  | -0.07  | -0.06 | 0.08  |
| 7 | 20 | 0.00 | -0.15  | -0.15  | -0.09 | -0.15  | 0.09  | 0.17  |
| 7 | 21 | 0.00 | -1.93  | -2.08  | -1.58 | -2.08  | 1.58  | 2.41  |
| 7 | 22 | 0.00 | 0.50   | 0.12   | 0.2   | 0.12   | -0.2  | 0.35  |
| 7 | 23 | 0.00 | 0.45   | 0.92   | 0.78  | 0.92   | -0.78 | 1.02  |
| 7 | 24 | 0.00 | -0.89  | -1.77  | -0.67 | -1.77  | 0.67  | 1.63  |
| 7 | 25 | 0.00 | 0.01   | -0.11  | -0.1  | -0.11  | 0.1   | 0.12  |
| 7 | 26 | 0.00 | -0.53  | -0.50  | -0.42 | -0.5   | 0.42  | 0.61  |
| 7 | 27 | 0.00 | -3.62  | -2.84  | -3.02 | -2.84  | 3.02  | 3.98  |
| 7 | 28 | 0.00 | 0.19   | 0.09   | 0.1   | 0.09   | -0.1  | 0.16  |
| 7 | 29 | 0.00 | -0.97  | -1.01  | -1.28 | -1.01  | 1.28  | 1.44  |
| 7 | 30 | 0.00 | -11.56 | -10.23 | -7.43 | -10.23 | 7.43  | 12.29 |
| 8 | 0  | 0.00 | 0.65   | 0.41   | -1.71 | 0.41   | 1.71  | 1.48  |
| 8 | 1  | 0.00 | -0.07  | 0.16   | 0.3   | 0.16   | -0.3  | 0.28  |
| 8 | 2  | 0.00 | 0.27   | -0.33  | -0.9  | -0.33  | 0.9   | 0.80  |
| 8 | 3  | 0.00 | -0.26  | -0.89  | 1.34  | -0.89  | -1.34 | 1.32  |
| 8 | 4  | 0.00 | 0.05   | -0.15  | 0.36  | -0.15  | -0.36 | 0.32  |
| 8 | 5  | 0.00 | 0.55   | 0.87   | -1.54 | 0.87   | 1.54  | 1.48  |
| 8 | 6  | 0.00 | 0.19   | -0.01  | 0.1   | -0.01  | -0.1  | 0.14  |
| 8 | 7  | 0.00 | -0.08  | -0.35  | 0.45  | -0.35  | -0.45 | 0.47  |
| 8 | 8  | 0.00 | -0.30  | -0.16  | 0.57  | -0.16  | -0.57 | 0.51  |
| 8 | 9  | 0.00 | 0.29   | -0.09  | -0.44 | -0.09  | 0.44  | 0.40  |
| 8 | 10 | 0.00 | -0.03  | -0.07  | 0.04  | -0.07  | -0.04 | 0.07  |
| 8 | 11 | 0.00 | 0.01   | 0.08   | 0.06  | 0.08   | -0.06 | 0.08  |
| 8 | 12 | 0.00 | -0.03  | -0.02  | 0.17  | -0.02  | -0.17 | 0.14  |
| 8 | 13 | 0.00 | -0.03  | -0.05  | 0.09  | -0.05  | -0.09 | 0.09  |
| 8 | 14 | 0.00 | -0.03  | 0.12   | -0.17 | 0.12   | 0.17  | 0.17  |
| 8 | 15 | 0.00 | 0.01   | -0.03  | 0.02  | -0.03  | -0.02 | 0.03  |
| 8 | 16 | 0.00 | -0.03  | 0.00   | 0.04  | 0      | -0.04 | 0.04  |
| 8 | 17 | 0.00 | 0.00   | -0.02  | 0.07  | -0.02  | -0.07 | 0.06  |
| 8 | 18 | 0.00 | 0.02   | 0.00   | 0.06  | 0      | -0.06 | 0.05  |
| 8 | 19 | 0.00 | 0.01   | 0.00   | 0     | 0      | 0     | 0.01  |
| 8 | 20 | 0.00 | -0.04  | 0.02   | -0.11 | 0.02   | 0.11  | 0.09  |
| 8 | 21 | 0.00 | -0.52  | -0.31  | -0.55 | -0.31  | 0.55  | 0.60  |
| 8 | 22 | 0.00 | 0.20   | -0.06  | 0.15  | -0.06  | -0.15 | 0.18  |
| 8 | 23 | 0.00 | 1.16   | -0.61  | 1.34  | -0.61  | -1.34 | 1.38  |
| 8 | 24 | 0.00 | -4.22  | 2.79   | -4.56 | 2.79   | 4.56  | 5.00  |
| 8 | 25 | 0.00 | 0.09   | 0.05   | 0.02  | 0.05   | -0.02 | 0.07  |
| 8 | 26 | 0.00 | -0.29  | 0.28   | -0.41 | 0.28   | 0.41  | 0.44  |

---

|    |    |      |       |       |       |       |       |      |
|----|----|------|-------|-------|-------|-------|-------|------|
| 8  | 27 | 0.00 | 0.53  | -1.91 | 1.01  | -1.91 | -1.01 | 1.79 |
| 8  | 28 | 0.00 | -0.55 | -0.08 | -0.3  | -0.08 | 0.3   | 0.41 |
| 8  | 29 | 0.00 | -0.04 | -0.26 | -0.15 | -0.26 | 0.15  | 0.25 |
| 8  | 30 | 0.00 | -1.66 | -0.25 | -2.17 | -0.25 | 2.17  | 2.02 |
| 9  | 0  | 0.00 | 0.35  | 1.98  | 1.2   | 1.98  | -1.2  | 1.90 |
| 9  | 1  | 0.00 | -0.13 | 0.08  | 0.16  | 0.08  | -0.16 | 0.16 |
| 9  | 2  | 0.00 | -0.11 | 0.04  | -0.01 | 0.04  | 0.01  | 0.07 |
| 9  | 3  | 0.00 | 0.32  | -0.44 | 0.02  | -0.44 | -0.02 | 0.40 |
| 9  | 4  | 0.00 | 0.07  | -0.48 | -0.73 | -0.48 | 0.73  | 0.71 |
| 9  | 5  | 0.00 | -0.70 | 0.29  | -0.28 | 0.29  | 0.28  | 0.52 |
| 9  | 6  | 0.00 | -0.01 | -0.10 | 0.04  | -0.1  | -0.04 | 0.09 |
| 9  | 7  | 0.00 | 0.42  | -0.18 | -0.18 | -0.18 | 0.18  | 0.32 |
| 9  | 8  | 0.00 | 0.50  | 0.10  | -0.29 | 0.1   | 0.29  | 0.38 |
| 9  | 9  | 0.00 | 0.15  | 0.28  | 0.16  | 0.28  | -0.16 | 0.28 |
| 9  | 10 | 0.00 | -0.02 | -0.01 | 0.03  | -0.01 | -0.03 | 0.03 |
| 9  | 11 | 0.00 | -0.04 | 0.02  | -0.11 | 0.02  | 0.11  | 0.09 |
| 9  | 12 | 0.00 | 0.03  | 0.02  | 0.02  | 0.02  | -0.02 | 0.03 |
| 9  | 13 | 0.00 | 0.03  | 0.11  | 0.13  | 0.11  | -0.13 | 0.14 |
| 9  | 14 | 0.00 | 0.05  | 0.03  | -0.01 | 0.03  | 0.01  | 0.04 |
| 9  | 15 | 0.00 | -0.07 | -0.05 | 0.01  | -0.05 | -0.01 | 0.06 |
| 9  | 16 | 0.00 | 0.01  | 0.01  | -0.12 | 0.01  | 0.12  | 0.10 |
| 9  | 17 | 0.00 | -0.06 | -0.15 | 0.24  | -0.15 | -0.24 | 0.23 |
| 9  | 18 | 0.00 | -0.06 | 0.03  | 0.05  | 0.03  | -0.05 | 0.06 |
| 9  | 19 | 0.00 | 0.10  | -0.07 | -0.02 | -0.07 | 0.02  | 0.08 |
| 9  | 20 | 0.00 | 0.03  | 0.04  | 0     | 0.04  | 0     | 0.04 |
| 9  | 21 | 0.00 | 0.58  | 0.72  | 0.49  | 0.72  | -0.49 | 0.79 |
| 9  | 22 | 0.00 | -0.04 | 0.04  | 0.06  | 0.04  | -0.06 | 0.06 |
| 9  | 23 | 0.00 | 0.79  | 0.28  | 0.73  | 0.28  | -0.73 | 0.78 |
| 9  | 24 | 0.00 | -3.05 | -1.57 | -3.3  | -1.57 | 3.3   | 3.46 |
| 9  | 25 | 0.00 | -0.15 | -0.18 | -0.15 | -0.18 | 0.15  | 0.21 |
| 9  | 26 | 0.00 | -0.73 | -0.34 | -0.59 | -0.34 | 0.59  | 0.70 |
| 9  | 27 | 0.00 | 1.95  | 1.36  | 1.82  | 1.36  | -1.82 | 2.17 |
| 9  | 28 | 0.00 | 0.44  | 0.50  | 0.41  | 0.5   | -0.41 | 0.59 |
| 9  | 29 | 0.00 | -0.01 | 0.09  | 0.11  | 0.09  | -0.11 | 0.12 |
| 9  | 30 | 0.00 | -1.55 | -1.04 | -1.38 | -1.04 | 1.38  | 1.67 |
| 10 | 0  | 0.00 | 0.09  | 0.34  | 0.01  | 0.34  | -0.01 | 0.28 |
| 10 | 1  | 0.00 | -0.09 | -0.05 | 0.11  | -0.05 | -0.11 | 0.11 |
| 10 | 2  | 0.00 | -0.04 | -0.03 | 0.01  | -0.03 | -0.01 | 0.03 |
| 10 | 3  | 0.00 | -0.03 | 0.03  | -0.05 | 0.03  | 0.05  | 0.05 |
| 10 | 4  | 0.00 | 0.01  | -0.10 | -0.02 | -0.1  | 0.02  | 0.08 |
| 10 | 5  | 0.00 | -0.02 | 0.07  | -0.16 | 0.07  | 0.16  | 0.14 |
| 10 | 6  | 0.00 | 0.00  | -0.05 | 0.04  | -0.05 | -0.04 | 0.05 |
| 10 | 7  | 0.00 | 0.12  | 0.01  | -0.16 | 0.01  | 0.16  | 0.15 |
| 10 | 8  | 0.00 | 0.14  | 0.06  | -0.04 | 0.06  | 0.04  | 0.10 |



|    |    |      |       |       |       |       |       |      |
|----|----|------|-------|-------|-------|-------|-------|------|
| 10 | 9  | 0.00 | 0.05  | -0.07 | -0.07 | -0.07 | 0.07  | 0.09 |
| 10 | 10 | 0.00 | 0.12  | 0.10  | -0.19 | 0.1   | 0.19  | 0.19 |
| 10 | 11 | 0.00 | -0.11 | -0.20 | 0.39  | -0.2  | -0.39 | 0.36 |
| 10 | 12 | 0.00 | -0.15 | -0.22 | 0.44  | -0.22 | -0.44 | 0.41 |
| 10 | 13 | 0.00 | 0.21  | -0.10 | -0.08 | -0.1  | 0.08  | 0.16 |
| 10 | 14 | 0.00 | 0.02  | -0.21 | 0.25  | -0.21 | -0.25 | 0.27 |
| 10 | 15 | 0.00 | 0.06  | 0.20  | -0.32 | 0.2   | 0.32  | 0.31 |
| 10 | 16 | 0.00 | -0.18 | 0.00  | 0.18  | 0     | -0.18 | 0.18 |
| 10 | 17 | 0.00 | 0.72  | 0.94  | -1.81 | 0.94  | 1.81  | 1.72 |
| 10 | 18 | 0.00 | 0.06  | -0.02 | 0.04  | -0.02 | -0.04 | 0.05 |
| 10 | 19 | 0.00 | -0.60 | 0.54  | 0.08  | 0.54  | -0.08 | 0.56 |
| 10 | 20 | 0.00 | -0.02 | -0.02 | 0.04  | -0.02 | -0.04 | 0.04 |
| 10 | 21 | 0.00 | 0.02  | -0.02 | 0.05  | -0.02 | -0.05 | 0.05 |
| 10 | 22 | 0.00 | -0.02 | -0.01 | 0.07  | -0.01 | -0.07 | 0.06 |
| 10 | 23 | 0.00 | 0.17  | 0.22  | 0.03  | 0.22  | -0.03 | 0.21 |
| 10 | 24 | 0.00 | -0.38 | 0.11  | -0.49 | 0.11  | 0.49  | 0.47 |
| 10 | 25 | 0.00 | -0.03 | -0.05 | 0     | -0.05 | 0     | 0.04 |
| 10 | 26 | 0.00 | -0.11 | -0.06 | -0.04 | -0.06 | 0.04  | 0.09 |
| 10 | 27 | 0.00 | 0.11  | -0.32 | 0.33  | -0.32 | -0.33 | 0.38 |
| 10 | 28 | 0.00 | 0.03  | 0.05  | 0.1   | 0.05  | -0.1  | 0.09 |
| 10 | 29 | 0.00 | -0.07 | -0.32 | 0.15  | -0.32 | -0.15 | 0.29 |
| 10 | 30 | 0.00 | -0.27 | -0.14 | -0.42 | -0.14 | 0.42  | 0.39 |
| 11 | 0  | 0.00 | -0.62 | 0.06  | 0.06  | 0.06  | -0.06 | 0.36 |
| 11 | 1  | 0.00 | 0.05  | -0.01 | -0.06 | -0.01 | 0.06  | 0.06 |
| 11 | 2  | 0.00 | -0.07 | 0.00  | 0.02  | 0     | -0.02 | 0.04 |
| 11 | 3  | 0.00 | 0.23  | -0.04 | -0.09 | -0.04 | 0.09  | 0.16 |
| 11 | 4  | 0.00 | 0.39  | 0.06  | -0.02 | 0.06  | 0.02  | 0.23 |
| 11 | 5  | 0.00 | 0.27  | 0.02  | -0.1  | 0.02  | 0.1   | 0.18 |
| 11 | 6  | 0.00 | 0.11  | -0.05 | -0.07 | -0.05 | 0.07  | 0.09 |
| 11 | 7  | 0.00 | -0.04 | 0.02  | 0.04  | 0.02  | -0.04 | 0.04 |
| 11 | 8  | 0.00 | 0.02  | 0.03  | -0.04 | 0.03  | 0.04  | 0.04 |
| 11 | 9  | 0.00 | 0.07  | 0.13  | 0.04  | 0.13  | -0.04 | 0.12 |
| 11 | 10 | 0.00 | 0.65  | -0.28 | -0.5  | -0.28 | 0.5   | 0.60 |
| 11 | 11 | 0.00 | 0.60  | -0.20 | -0.33 | -0.2  | 0.33  | 0.47 |
| 11 | 12 | 0.00 | 0.29  | -0.04 | -0.23 | -0.04 | 0.23  | 0.25 |
| 11 | 13 | 0.00 | 0.11  | -0.04 | -0.07 | -0.04 | 0.07  | 0.09 |
| 11 | 14 | 0.00 | 0.29  | -0.11 | -0.18 | -0.11 | 0.18  | 0.24 |
| 11 | 15 | 0.00 | -0.17 | 0.09  | 0.09  | 0.09  | -0.09 | 0.14 |
| 11 | 16 | 0.00 | -0.02 | 0.02  | 0.03  | 0.02  | -0.03 | 0.03 |
| 11 | 17 | 0.00 | 0.10  | -0.06 | 0.01  | -0.06 | -0.01 | 0.08 |
| 11 | 18 | 0.00 | 0.01  | 0.01  | 0     | 0.01  | 0     | 0.01 |
| 11 | 19 | 0.00 | 0.00  | 0.00  | -0.02 | 0     | 0.02  | 0.02 |
| 11 | 20 | 0.00 | 0.01  | -0.03 | -0.01 | -0.03 | 0.01  | 0.03 |
| 11 | 21 | 0.00 | -0.15 | -0.37 | -0.24 | -0.37 | 0.24  | 0.37 |

---

|    |    |      |       |       |       |       |       |      |
|----|----|------|-------|-------|-------|-------|-------|------|
| 11 | 22 | 0.00 | 0.08  | 0.03  | 0.05  | 0.03  | -0.05 | 0.07 |
| 11 | 23 | 0.00 | 0.08  | 0.18  | 0.18  | 0.18  | -0.18 | 0.21 |
| 11 | 24 | 0.00 | -0.37 | -0.25 | -0.31 | -0.25 | 0.31  | 0.39 |
| 11 | 25 | 0.00 | 0.20  | -0.05 | -0.03 | -0.05 | 0.03  | 0.12 |
| 11 | 26 | 0.00 | -0.09 | -0.07 | -0.08 | -0.07 | 0.08  | 0.10 |
| 11 | 27 | 0.00 | -0.87 | -0.69 | -0.56 | -0.69 | 0.56  | 0.88 |
| 11 | 28 | 0.00 | 0.01  | 0.10  | 0.1   | 0.1   | -0.1  | 0.12 |
| 11 | 29 | 0.00 | -0.31 | -0.22 | -0.27 | -0.22 | 0.27  | 0.34 |
| 11 | 30 | 0.00 | -2.08 | -1.86 | -1.42 | -1.86 | 1.42  | 2.26 |
| 12 | 0  | 0.00 | -0.13 | 0.11  | -0.2  | 0.11  | 0.2   | 0.20 |
| 12 | 1  | 0.00 | 0.10  | -0.12 | 0.07  | -0.12 | -0.07 | 0.13 |
| 12 | 2  | 0.00 | -0.17 | 0.09  | -0.1  | 0.09  | 0.1   | 0.15 |
| 12 | 3  | 0.00 | -0.01 | -0.09 | 0.04  | -0.09 | -0.04 | 0.08 |
| 12 | 4  | 0.00 | -0.06 | -0.03 | 0.03  | -0.03 | -0.03 | 0.05 |
| 12 | 5  | 0.00 | 0.03  | 0.08  | -0.21 | 0.08  | 0.21  | 0.18 |
| 12 | 6  | 0.00 | -0.04 | 0.00  | 0.04  | 0     | -0.04 | 0.04 |
| 12 | 7  | 0.00 | 0.01  | 0.01  | 0     | 0.01  | 0     | 0.01 |
| 12 | 8  | 0.00 | 0.03  | -0.01 | -0.02 | -0.01 | 0.02  | 0.03 |
| 12 | 9  | 0.00 | 0.04  | -0.03 | -0.04 | -0.03 | 0.04  | 0.05 |
| 12 | 10 | 0.00 | 0.08  | 0.27  | -0.48 | 0.27  | 0.48  | 0.45 |
| 12 | 11 | 0.00 | -0.14 | -0.21 | 0.46  | -0.21 | -0.46 | 0.42 |
| 12 | 12 | 0.00 | 0.29  | 0.76  | -1.41 | 0.76  | 1.41  | 1.32 |
| 12 | 13 | 0.00 | 0.11  | 0.12  | -0.25 | 0.12  | 0.25  | 0.24 |
| 12 | 14 | 0.00 | -0.01 | -0.04 | 0.08  | -0.04 | -0.08 | 0.07 |
| 12 | 15 | 0.00 | 0.22  | 0.57  | -1.11 | 0.57  | 1.11  | 1.03 |
| 12 | 16 | 0.00 | 0.25  | 0.01  | -0.24 | 0.01  | 0.24  | 0.24 |
| 12 | 17 | 0.00 | 0.01  | 0.02  | -0.02 | 0.02  | 0.02  | 0.02 |
| 12 | 18 | 0.00 | 0.00  | -0.01 | 0.02  | -0.01 | -0.02 | 0.02 |
| 12 | 19 | 0.00 | -0.04 | 0.01  | 0.04  | 0.01  | -0.04 | 0.04 |
| 12 | 20 | 0.00 | -0.16 | 0.10  | -0.1  | 0.1   | 0.1   | 0.15 |
| 12 | 21 | 0.00 | -0.04 | 0.17  | -0.23 | 0.17  | 0.23  | 0.23 |
| 12 | 22 | 0.00 | 0.01  | 0.00  | -0.01 | 0     | 0.01  | 0.01 |
| 12 | 23 | 0.00 | 0.15  | -0.10 | 0.18  | -0.1  | -0.18 | 0.19 |
| 12 | 24 | 0.00 | -0.30 | 0.12  | -0.33 | 0.12  | 0.33  | 0.33 |
| 12 | 25 | 0.00 | -0.08 | 0.01  | -0.01 | 0.01  | 0.01  | 0.05 |
| 12 | 26 | 0.00 | 0.04  | 0.03  | -0.13 | 0.03  | 0.13  | 0.11 |
| 12 | 27 | 0.00 | 0.47  | -0.22 | 0.45  | -0.22 | -0.45 | 0.49 |
| 12 | 28 | 0.00 | -0.04 | -0.01 | 0.02  | -0.01 | -0.02 | 0.03 |
| 12 | 29 | 0.00 | 0.33  | -0.16 | 0.32  | -0.16 | -0.32 | 0.35 |
| 12 | 30 | 0.00 | 0.32  | 0.14  | -0.05 | 0.14  | 0.05  | 0.22 |
| 13 | 0  | 0.00 | 0.03  | -0.18 | -0.07 | -0.18 | 0.07  | 0.16 |
| 13 | 1  | 0.00 | -0.03 | -0.02 | -0.05 | -0.02 | 0.05  | 0.05 |
| 13 | 2  | 0.00 | 0.09  | 0.02  | 0.06  | 0.02  | -0.06 | 0.07 |
| 13 | 3  | 0.00 | -0.05 | 0.08  | 0.01  | 0.08  | -0.01 | 0.07 |

---

---

|    |    |      |       |       |       |       |       |      |
|----|----|------|-------|-------|-------|-------|-------|------|
| 13 | 4  | 0.00 | -0.03 | 0.02  | -0.03 | 0.02  | 0.03  | 0.03 |
| 13 | 5  | 0.00 | 0.03  | -0.05 | 0.18  | -0.05 | -0.18 | 0.15 |
| 13 | 6  | 0.00 | -0.10 | -0.05 | 0.07  | -0.05 | -0.07 | 0.09 |
| 13 | 7  | 0.00 | -0.13 | -0.09 | 0.1   | -0.09 | -0.1  | 0.13 |
| 13 | 8  | 0.00 | 0.13  | -0.08 | 0.17  | -0.08 | -0.17 | 0.17 |
| 13 | 9  | 0.00 | -0.23 | 0.04  | -0.09 | 0.04  | 0.09  | 0.16 |
| 13 | 10 | 0.00 | -0.04 | -0.01 | 0.07  | -0.01 | -0.07 | 0.06 |
| 13 | 11 | 0.00 | 0.03  | 0.06  | -0.07 | 0.06  | 0.07  | 0.08 |
| 13 | 12 | 0.00 | 0.00  | 0.06  | -0.08 | 0.06  | 0.08  | 0.08 |
| 13 | 13 | 0.00 | -0.03 | -0.01 | -0.04 | -0.01 | 0.04  | 0.04 |
| 13 | 14 | 0.00 | -0.06 | 0.02  | 0     | 0.02  | 0     | 0.04 |
| 13 | 15 | 0.00 | 0.00  | -0.04 | 0.07  | -0.04 | -0.07 | 0.07 |
| 13 | 16 | 0.00 | 0.02  | 0.02  | 0     | 0.02  | 0     | 0.02 |
| 13 | 17 | 0.00 | 0.01  | -0.10 | 0.13  | -0.1  | -0.13 | 0.13 |
| 13 | 18 | 0.00 | -0.36 | 0.44  | 0.68  | 0.44  | -0.68 | 0.69 |
| 13 | 19 | 0.00 | 0.03  | 0.09  | 0.15  | 0.09  | -0.15 | 0.14 |
| 13 | 20 | 0.00 | 0.09  | -0.06 | -0.03 | -0.06 | 0.03  | 0.08 |
| 13 | 21 | 0.00 | -0.22 | -0.10 | 0.02  | -0.1  | -0.02 | 0.15 |
| 13 | 22 | 0.00 | -0.39 | -0.21 | 0.19  | -0.21 | -0.19 | 0.32 |
| 13 | 23 | 0.00 | -0.47 | 0.20  | -0.23 | 0.2   | 0.23  | 0.37 |
| 13 | 24 | 0.00 | 0.00  | -1.47 | 0.23  | -1.47 | -0.23 | 1.21 |
| 13 | 25 | 0.00 | 0.38  | -0.07 | 0     | -0.07 | 0     | 0.23 |
| 13 | 26 | 0.00 | 0.07  | 0.01  | 0.11  | 0.01  | -0.11 | 0.10 |
| 13 | 27 | 0.00 | -0.20 | 0.23  | -0.15 | 0.23  | 0.15  | 0.25 |
| 13 | 28 | 0.00 | 0.00  | 0.16  | 0.12  | 0.16  | -0.12 | 0.16 |
| 13 | 29 | 0.00 | -0.07 | 0.25  | -0.16 | 0.25  | 0.16  | 0.25 |
| 13 | 30 | 0.00 | 0.37  | 0.44  | 0.07  | 0.44  | -0.07 | 0.42 |
| 14 | 0  | 0.00 | -0.11 | -0.06 | 0.05  | -0.06 | -0.05 | 0.09 |
| 14 | 1  | 0.00 | 0.09  | -0.02 | 0.26  | -0.02 | -0.26 | 0.22 |
| 14 | 2  | 0.00 | -0.25 | -0.03 | -0.08 | -0.03 | 0.08  | 0.16 |
| 14 | 3  | 0.00 | -0.05 | -0.03 | 0.01  | -0.03 | -0.01 | 0.04 |
| 14 | 4  | 0.00 | -0.08 | 0.07  | -0.07 | 0.07  | 0.07  | 0.09 |
| 14 | 5  | 0.00 | -0.02 | -0.05 | 0.09  | -0.05 | -0.09 | 0.08 |
| 14 | 6  | 0.00 | 0.05  | 0.02  | 0.13  | 0.02  | -0.13 | 0.11 |
| 14 | 7  | 0.00 | -0.11 | -0.01 | 0.11  | -0.01 | -0.11 | 0.11 |
| 14 | 8  | 0.00 | -0.08 | -0.10 | -0.05 | -0.1  | 0.05  | 0.10 |
| 14 | 9  | 0.00 | -0.15 | 0.07  | -0.05 | 0.07  | 0.05  | 0.11 |
| 14 | 10 | 0.00 | 0.08  | -0.02 | -0.05 | -0.02 | 0.05  | 0.06 |
| 14 | 11 | 0.00 | 0.02  | 0.05  | -0.11 | 0.05  | 0.11  | 0.10 |
| 14 | 12 | 0.00 | -0.03 | -0.06 | 0.05  | -0.06 | -0.05 | 0.07 |
| 14 | 13 | 0.00 | 0.02  | -0.02 | -0.01 | -0.02 | 0.01  | 0.02 |
| 14 | 14 | 0.00 | 0.04  | -0.01 | -0.05 | -0.01 | 0.05  | 0.05 |
| 14 | 15 | 0.00 | -0.04 | -0.08 | 0.14  | -0.08 | -0.14 | 0.13 |
| 14 | 16 | 0.00 | 0.04  | 0.00  | 0.03  | 0     | -0.03 | 0.03 |

---

---

|    |    |      |       |       |       |       |       |      |
|----|----|------|-------|-------|-------|-------|-------|------|
| 14 | 17 | 0.00 | -0.01 | -0.03 | 0.03  | -0.03 | -0.03 | 0.04 |
| 14 | 18 | 0.00 | -0.09 | 0.10  | 0.23  | 0.1   | -0.23 | 0.21 |
| 14 | 19 | 0.00 | 0.03  | 0.01  | 0.04  | 0.01  | -0.04 | 0.04 |
| 14 | 20 | 0.00 | -0.60 | 0.17  | 0.14  | 0.17  | -0.14 | 0.39 |
| 14 | 21 | 0.00 | 0.49  | 0.70  | -0.02 | 0.7   | 0.02  | 0.64 |
| 14 | 22 | 0.00 | 0.31  | -0.09 | 0.07  | -0.09 | -0.07 | 0.20 |
| 14 | 23 | 0.00 | 1.55  | 0.25  | 0.59  | 0.25  | -0.59 | 1.04 |
| 14 | 24 | 0.00 | 0.59  | -0.26 | 0.32  | -0.26 | -0.32 | 0.48 |
| 14 | 25 | 0.00 | -1.28 | 0.16  | 0.16  | 0.16  | -0.16 | 0.76 |
| 14 | 26 | 0.00 | 0.04  | -0.04 | -0.35 | -0.04 | 0.35  | 0.29 |
| 14 | 27 | 0.00 | 0.30  | 0.44  | 0.14  | 0.44  | -0.14 | 0.41 |
| 14 | 28 | 0.00 | -0.06 | -0.35 | -0.38 | -0.35 | 0.38  | 0.42 |
| 14 | 29 | 0.00 | 0.49  | -0.42 | 0.49  | -0.42 | -0.49 | 0.60 |
| 14 | 30 | 0.00 | 0.31  | 0.36  | 0.07  | 0.36  | -0.07 | 0.35 |
| 15 | 0  | 0.00 | 0.03  | 0.05  | -0.09 | 0.05  | 0.09  | 0.09 |
| 15 | 1  | 0.00 | 0.09  | 0.08  | 0.01  | 0.08  | -0.01 | 0.08 |
| 15 | 2  | 0.00 | -0.21 | 0.02  | -0.14 | 0.02  | 0.14  | 0.17 |
| 15 | 3  | 0.00 | 0.06  | 0.07  | -0.08 | 0.07  | 0.08  | 0.09 |
| 15 | 4  | 0.00 | 0.14  | 0.04  | 0.21  | 0.04  | -0.21 | 0.19 |
| 15 | 5  | 0.00 | 0.16  | 0.09  | -0.05 | 0.09  | 0.05  | 0.12 |
| 15 | 6  | 0.00 | -0.02 | 0.03  | -0.08 | 0.03  | 0.08  | 0.07 |
| 15 | 7  | 0.00 | 0.01  | 0.04  | -0.04 | 0.04  | 0.04  | 0.05 |
| 15 | 8  | 0.00 | 0.13  | -0.02 | 0.06  | -0.02 | -0.06 | 0.09 |
| 15 | 9  | 0.00 | 0.01  | 0.04  | 0.08  | 0.04  | -0.08 | 0.07 |
| 15 | 10 | 0.00 | 0.06  | 0.01  | -0.06 | 0.01  | 0.06  | 0.06 |
| 15 | 11 | 0.00 | 0.00  | -0.04 | 0.02  | -0.04 | -0.02 | 0.04 |
| 15 | 12 | 0.00 | 0.07  | 0.11  | -0.14 | 0.11  | 0.14  | 0.15 |
| 15 | 13 | 0.00 | -0.04 | 0.03  | -0.01 | 0.03  | 0.01  | 0.03 |
| 15 | 14 | 0.00 | 0.00  | -0.01 | -0.04 | -0.01 | 0.04  | 0.03 |
| 15 | 15 | 0.00 | -0.06 | 0.09  | -0.11 | 0.09  | 0.11  | 0.12 |
| 15 | 16 | 0.00 | -0.03 | 0.03  | 0.01  | 0.03  | -0.01 | 0.03 |
| 15 | 17 | 0.00 | 0.04  | -0.01 | -0.01 | -0.01 | 0.01  | 0.03 |
| 15 | 18 | 0.00 | 0.00  | 0.03  | 0.06  | 0.03  | -0.06 | 0.05 |
| 15 | 19 | 0.00 | 0.00  | 0.00  | -0.01 | 0     | 0.01  | 0.01 |
| 15 | 20 | 0.00 | 1.25  | -0.10 | -0.1  | -0.1  | 0.1   | 0.73 |
| 15 | 21 | 0.00 | 0.85  | -0.06 | 0.15  | -0.06 | -0.15 | 0.51 |
| 15 | 22 | 0.00 | 0.14  | 0.02  | -0.02 | 0.02  | 0.02  | 0.08 |
| 15 | 23 | 0.00 | -0.25 | 0.47  | -0.05 | 0.47  | 0.05  | 0.41 |
| 15 | 24 | 0.00 | 0.16  | -0.04 | 0.03  | -0.04 | -0.03 | 0.10 |
| 15 | 25 | 0.00 | -0.77 | 0.11  | 0     | 0.11  | 0     | 0.45 |
| 15 | 26 | 0.00 | -0.23 | -0.07 | 0.4   | -0.07 | -0.4  | 0.36 |
| 15 | 27 | 0.00 | 0.76  | -0.39 | 0.33  | -0.39 | -0.33 | 0.61 |
| 15 | 28 | 0.00 | 0.04  | -0.28 | -0.41 | -0.28 | 0.41  | 0.41 |
| 15 | 29 | 0.00 | -0.27 | -0.20 | -0.09 | -0.2  | 0.09  | 0.24 |

---

---

|    |    |      |       |       |       |       |       |      |
|----|----|------|-------|-------|-------|-------|-------|------|
| 15 | 30 | 0.00 | -0.83 | -0.39 | -0.36 | -0.39 | 0.36  | 0.65 |
| 16 | 0  | 0.00 | -0.20 | -0.18 | -0.09 | -0.18 | 0.09  | 0.20 |
| 16 | 1  | 0.00 | 0.30  | 0.07  | -0.03 | 0.07  | 0.03  | 0.18 |
| 16 | 2  | 0.00 | 0.04  | -0.03 | 0.07  | -0.03 | -0.07 | 0.07 |
| 16 | 3  | 0.00 | 0.11  | -0.02 | -0.08 | -0.02 | 0.08  | 0.09 |
| 16 | 4  | 0.00 | 0.00  | -0.04 | -0.04 | -0.04 | 0.04  | 0.05 |
| 16 | 5  | 0.00 | 0.10  | 0.06  | 0.09  | 0.06  | -0.09 | 0.11 |
| 16 | 6  | 0.00 | -0.01 | 0.01  | -0.05 | 0.01  | 0.05  | 0.04 |
| 16 | 7  | 0.00 | 0.04  | -0.04 | 0.08  | -0.04 | -0.08 | 0.08 |
| 16 | 8  | 0.00 | -0.05 | 0.01  | 0.05  | 0.01  | -0.05 | 0.05 |
| 16 | 9  | 0.00 | -0.04 | -0.01 | -0.03 | -0.01 | 0.03  | 0.03 |
| 16 | 10 | 0.00 | 0.05  | 0.02  | -0.04 | 0.02  | 0.04  | 0.05 |
| 16 | 11 | 0.00 | 0.53  | 0.94  | -1.87 | 0.94  | 1.87  | 1.74 |
| 16 | 12 | 0.00 | 0.24  | 0.37  | -0.78 | 0.37  | 0.78  | 0.72 |
| 16 | 13 | 0.00 | -0.41 | 0.47  | 0     | 0.47  | 0     | 0.45 |
| 16 | 14 | 0.00 | -0.07 | 0.24  | -0.27 | 0.24  | 0.27  | 0.30 |
| 16 | 15 | 0.00 | -0.06 | -0.20 | 0.32  | -0.2  | -0.32 | 0.31 |
| 16 | 16 | 0.00 | -0.20 | 0.00  | 0.18  | 0     | -0.18 | 0.19 |
| 16 | 17 | 0.00 | 0.21  | 0.31  | -0.61 | 0.31  | 0.61  | 0.57 |
| 16 | 18 | 0.00 | 0.00  | -0.02 | -0.01 | -0.02 | 0.01  | 0.02 |
| 16 | 19 | 0.00 | -0.11 | 0.15  | -0.04 | 0.15  | 0.04  | 0.14 |
| 16 | 20 | 0.00 | -0.04 | 0.02  | -0.05 | 0.02  | 0.05  | 0.05 |
| 16 | 21 | 0.00 | -0.17 | -0.14 | -0.17 | -0.14 | 0.17  | 0.20 |
| 16 | 22 | 0.00 | -0.03 | -0.01 | 0     | -0.01 | 0     | 0.02 |
| 16 | 23 | 0.00 | -0.11 | -0.19 | -0.04 | -0.19 | 0.04  | 0.17 |
| 16 | 24 | 0.00 | -0.08 | -0.23 | 0.11  | -0.23 | -0.11 | 0.21 |
| 16 | 25 | 0.00 | 0.19  | -0.03 | -0.07 | -0.03 | 0.07  | 0.13 |
| 16 | 26 | 0.00 | 0.02  | 0.01  | -0.02 | 0.01  | 0.02  | 0.02 |
| 16 | 27 | 0.00 | -0.01 | 0.05  | -0.07 | 0.05  | 0.07  | 0.07 |
| 16 | 28 | 0.00 | 0.06  | 0.01  | -0.01 | 0.01  | 0.01  | 0.04 |
| 16 | 29 | 0.00 | 0.07  | 0.08  | 0.04  | 0.08  | -0.04 | 0.08 |
| 16 | 30 | 0.00 | 0.10  | 0.03  | -0.02 | 0.03  | 0.02  | 0.06 |
| 17 | 0  | 0.00 | 0.42  | 0.11  | 0.42  | 0.11  | -0.42 | 0.43 |
| 17 | 1  | 0.00 | 0.07  | -0.03 | 0.02  | -0.03 | -0.02 | 0.05 |
| 17 | 2  | 0.00 | 0.25  | 0.09  | -0.02 | 0.09  | 0.02  | 0.16 |
| 17 | 3  | 0.00 | 0.01  | 0.06  | -0.06 | 0.06  | 0.06  | 0.07 |
| 17 | 4  | 0.00 | 0.05  | 0.00  | 0.03  | 0     | -0.03 | 0.04 |
| 17 | 5  | 0.00 | 0.01  | 0.09  | -0.08 | 0.09  | 0.08  | 0.10 |
| 17 | 6  | 0.00 | 0.18  | 0.10  | -0.12 | 0.1   | 0.12  | 0.16 |
| 17 | 7  | 0.00 | -0.07 | -0.08 | -0.08 | -0.08 | 0.08  | 0.10 |
| 17 | 8  | 0.00 | 0.01  | 0.00  | -0.06 | 0     | 0.06  | 0.05 |
| 17 | 9  | 0.00 | 0.01  | 0.06  | 0.03  | 0.06  | -0.03 | 0.06 |
| 17 | 10 | 0.00 | -0.43 | -1.04 | 1.81  | -1.04 | -1.81 | 1.72 |
| 17 | 11 | 0.00 | 0.16  | 0.02  | -0.22 | 0.02  | 0.22  | 0.20 |

---

---

|    |    |      |       |       |       |       |       |      |
|----|----|------|-------|-------|-------|-------|-------|------|
| 17 | 12 | 0.00 | 0.14  | -0.02 | -0.06 | -0.02 | 0.06  | 0.10 |
| 17 | 13 | 0.00 | -0.59 | 0.19  | 0.36  | 0.19  | -0.36 | 0.48 |
| 17 | 14 | 0.00 | -0.09 | 0.02  | 0.08  | 0.02  | -0.08 | 0.09 |
| 17 | 15 | 0.00 | 0.19  | 0.40  | -0.84 | 0.4   | 0.84  | 0.77 |
| 17 | 16 | 0.00 | -0.42 | 0.13  | 0.25  | 0.13  | -0.25 | 0.33 |
| 17 | 17 | 0.00 | -0.04 | 0.09  | -0.09 | 0.09  | 0.09  | 0.11 |
| 17 | 18 | 0.00 | -0.04 | 0.02  | 0.01  | 0.02  | -0.01 | 0.03 |
| 17 | 19 | 0.00 | -0.01 | 0.03  | -0.06 | 0.03  | 0.06  | 0.06 |
| 17 | 20 | 0.00 | 0.01  | 0.14  | -0.11 | 0.14  | 0.11  | 0.15 |
| 17 | 21 | 0.00 | 0.22  | 0.01  | 0.46  | 0.01  | -0.46 | 0.40 |
| 17 | 22 | 0.00 | -0.01 | 0.05  | -0.02 | 0.05  | 0.02  | 0.04 |
| 17 | 23 | 0.00 | 0.00  | 0.39  | -0.25 | 0.39  | 0.25  | 0.38 |
| 17 | 24 | 0.00 | 0.03  | 0.07  | -0.04 | 0.07  | 0.04  | 0.07 |
| 17 | 25 | 0.00 | 0.00  | -0.09 | 0     | -0.09 | 0     | 0.07 |
| 17 | 26 | 0.00 | 0.04  | 0.01  | -0.05 | 0.01  | 0.05  | 0.05 |
| 17 | 27 | 0.00 | 0.12  | -0.05 | 0.23  | -0.05 | -0.23 | 0.20 |
| 17 | 28 | 0.00 | 0.03  | -0.06 | 0     | -0.06 | 0     | 0.05 |
| 17 | 29 | 0.00 | -0.19 | 0.30  | -0.32 | 0.3   | 0.32  | 0.37 |
| 17 | 30 | 0.00 | -0.26 | 0.05  | -0.06 | 0.05  | 0.06  | 0.16 |
| 18 | 0  | 0.00 | -0.10 | -0.21 | 0.1   | -0.21 | -0.1  | 0.20 |
| 18 | 1  | 0.00 | 0.12  | -0.12 | 0     | -0.12 | 0     | 0.12 |
| 18 | 2  | 0.00 | -0.02 | -0.09 | -0.03 | -0.09 | 0.03  | 0.08 |
| 18 | 3  | 0.00 | -0.03 | -0.01 | 0.04  | -0.01 | -0.04 | 0.04 |
| 18 | 4  | 0.00 | 0.00  | -0.02 | 0.09  | -0.02 | -0.09 | 0.08 |
| 18 | 5  | 0.00 | -0.10 | 0.00  | -0.11 | 0     | 0.11  | 0.11 |
| 18 | 6  | 0.00 | -0.05 | 0.05  | -0.04 | 0.05  | 0.04  | 0.06 |
| 18 | 7  | 0.00 | -0.06 | 0.04  | 0.12  | 0.04  | -0.12 | 0.11 |
| 18 | 8  | 0.00 | -0.05 | 0.00  | 0     | 0     | 0     | 0.03 |
| 18 | 9  | 0.00 | 0.04  | 0.08  | 0.01  | 0.08  | -0.01 | 0.07 |
| 18 | 10 | 0.00 | 0.19  | 0.47  | -0.81 | 0.47  | 0.81  | 0.77 |
| 18 | 11 | 0.00 | 0.04  | 0.32  | -0.53 | 0.32  | 0.53  | 0.51 |
| 18 | 12 | 0.00 | -0.28 | -0.48 | 0.99  | -0.48 | -0.99 | 0.91 |
| 18 | 13 | 0.00 | 0.25  | -0.16 | -0.09 | -0.16 | 0.09  | 0.21 |
| 18 | 14 | 0.00 | 0.16  | 0.22  | -0.54 | 0.22  | 0.54  | 0.48 |
| 18 | 15 | 0.00 | 0.27  | 0.62  | -1.23 | 0.62  | 1.23  | 1.14 |
| 18 | 16 | 0.00 | -0.91 | 0.30  | 0.56  | 0.3   | -0.56 | 0.74 |
| 18 | 17 | 0.00 | -0.16 | -0.14 | 0.37  | -0.14 | -0.37 | 0.34 |
| 18 | 18 | 0.00 | 0.01  | 0.02  | 0     | 0.02  | 0     | 0.02 |
| 18 | 19 | 0.00 | 0.16  | -0.11 | -0.01 | -0.11 | 0.01  | 0.13 |
| 18 | 20 | 0.00 | 0.08  | 0.20  | -0.35 | 0.2   | 0.35  | 0.33 |
| 18 | 21 | 0.00 | 0.01  | -0.06 | 0.03  | -0.06 | -0.03 | 0.06 |
| 18 | 22 | 0.00 | -0.01 | 0.01  | -0.03 | 0.01  | 0.03  | 0.03 |
| 18 | 23 | 0.00 | -0.14 | -0.06 | 0     | -0.06 | 0     | 0.09 |
| 18 | 24 | 0.00 | 0.09  | 0.19  | -0.17 | 0.19  | 0.17  | 0.21 |

---

---

|    |    |      |       |       |       |       |       |      |
|----|----|------|-------|-------|-------|-------|-------|------|
| 18 | 25 | 0.00 | -0.08 | -0.03 | 0.15  | -0.03 | -0.15 | 0.13 |
| 18 | 26 | 0.00 | 0.00  | 0.04  | -0.04 | 0.04  | 0.04  | 0.05 |
| 18 | 27 | 0.00 | 0.01  | -0.20 | 0.2   | -0.2  | -0.2  | 0.23 |
| 18 | 28 | 0.00 | -0.05 | -0.04 | 0.06  | -0.04 | -0.06 | 0.07 |
| 18 | 29 | 0.00 | 0.02  | 0.12  | -0.06 | 0.12  | 0.06  | 0.11 |
| 18 | 30 | 0.00 | 0.00  | 0.15  | 0.05  | 0.15  | -0.05 | 0.13 |
| 19 | 0  | 0.00 | 0.44  | 0.03  | -0.02 | 0.03  | 0.02  | 0.26 |
| 19 | 1  | 0.00 | 0.13  | -0.54 | -0.14 | -0.54 | 0.14  | 0.46 |
| 19 | 2  | 0.00 | -0.18 | -0.56 | 0.53  | -0.56 | -0.53 | 0.64 |
| 19 | 3  | 0.00 | 0.04  | -0.46 | 0.19  | -0.46 | -0.19 | 0.41 |
| 19 | 4  | 0.00 | 0.58  | 0.21  | 0.06  | 0.21  | -0.06 | 0.38 |
| 19 | 5  | 0.00 | -0.04 | -0.40 | 0.12  | -0.4  | -0.12 | 0.34 |
| 19 | 6  | 0.00 | 0.00  | -0.16 | 0.12  | -0.16 | -0.12 | 0.16 |
| 19 | 7  | 0.00 | -0.33 | 0.22  | -0.15 | 0.22  | 0.15  | 0.29 |
| 19 | 8  | 0.00 | -0.09 | -0.05 | -0.09 | -0.05 | 0.09  | 0.10 |
| 19 | 9  | 0.00 | 0.45  | -0.14 | 0.03  | -0.14 | -0.03 | 0.28 |
| 19 | 10 | 0.00 | 0.10  | -0.09 | 0.1   | -0.09 | -0.1  | 0.12 |
| 19 | 11 | 0.00 | -0.04 | 0.03  | -0.03 | 0.03  | 0.03  | 0.04 |
| 19 | 12 | 0.00 | 0.11  | -0.05 | -0.13 | -0.05 | 0.13  | 0.13 |
| 19 | 13 | 0.00 | 0.00  | -0.04 | -0.05 | -0.04 | 0.05  | 0.05 |
| 19 | 14 | 0.00 | -0.12 | -0.05 | 0.14  | -0.05 | -0.14 | 0.14 |
| 19 | 15 | 0.00 | 0.26  | 0.05  | -0.13 | 0.05  | 0.13  | 0.19 |
| 19 | 16 | 0.00 | -0.07 | -0.01 | -0.1  | -0.01 | 0.1   | 0.09 |
| 19 | 17 | 0.00 | -0.05 | -0.03 | 0.05  | -0.03 | -0.05 | 0.06 |
| 19 | 18 | 0.00 | 0.15  | -0.03 | 0.08  | -0.03 | -0.08 | 0.11 |
| 19 | 19 | 0.00 | -0.13 | 0.06  | 0.15  | 0.06  | -0.15 | 0.15 |
| 19 | 20 | 0.00 | -0.11 | -0.36 | -0.48 | -0.36 | 0.48  | 0.49 |
| 19 | 21 | 0.00 | -1.74 | -2.14 | -3.79 | -2.14 | 3.79  | 3.69 |
| 19 | 22 | 0.00 | 0.04  | -0.55 | 0.09  | -0.55 | -0.09 | 0.46 |
| 19 | 23 | 0.00 | -1.66 | -4.05 | 0.47  | -4.05 | -0.47 | 3.46 |
| 19 | 24 | 0.00 | -0.72 | 0.15  | -1.29 | 0.15  | 1.29  | 1.14 |
| 19 | 25 | 0.00 | 0.45  | 0.42  | 0.31  | 0.42  | -0.31 | 0.50 |
| 19 | 26 | 0.00 | -0.14 | 0.05  | -0.19 | 0.05  | 0.19  | 0.18 |
| 19 | 27 | 0.00 | -2.64 | 0.14  | -2.03 | 0.14  | 2.03  | 2.25 |
| 19 | 28 | 0.00 | -0.06 | -0.08 | -0.01 | -0.08 | 0.01  | 0.07 |
| 19 | 29 | 0.00 | 0.47  | -1.14 | 1.53  | -1.14 | -1.53 | 1.58 |
| 19 | 30 | 0.00 | 2.17  | 0.05  | 0.87  | 0.05  | -0.87 | 1.44 |
| 20 | 0  | 0.00 | 0.33  | -0.28 | 0.07  | -0.28 | -0.07 | 0.30 |
| 20 | 1  | 0.00 | 0.26  | 0.77  | -0.37 | 0.77  | 0.37  | 0.71 |
| 20 | 2  | 0.00 | -0.05 | 0.41  | -0.21 | 0.41  | 0.21  | 0.38 |
| 20 | 3  | 0.00 | 0.23  | 0.75  | -0.07 | 0.75  | 0.07  | 0.63 |
| 20 | 4  | 0.00 | -0.11 | -0.23 | 0.21  | -0.23 | -0.21 | 0.26 |
| 20 | 5  | 0.00 | -0.03 | 0.72  | -0.39 | 0.72  | 0.39  | 0.67 |
| 20 | 6  | 0.00 | -0.09 | 0.66  | -0.68 | 0.66  | 0.68  | 0.78 |

---

|    |    |      |       |       |       |       |       |      |
|----|----|------|-------|-------|-------|-------|-------|------|
| 20 | 7  | 0.00 | 0.12  | 0.38  | -0.28 | 0.38  | 0.28  | 0.39 |
| 20 | 8  | 0.00 | -0.55 | 0.20  | -0.48 | 0.2   | 0.48  | 0.53 |
| 20 | 9  | 0.00 | 0.30  | 0.34  | 0.39  | 0.34  | -0.39 | 0.46 |
| 20 | 10 | 0.00 | 0.05  | 0.11  | -0.19 | 0.11  | 0.19  | 0.18 |
| 20 | 11 | 0.00 | 0.09  | -0.02 | 0.07  | -0.02 | -0.07 | 0.08 |
| 20 | 12 | 0.00 | 0.00  | 0.02  | -0.04 | 0.02  | 0.04  | 0.04 |
| 20 | 13 | 0.00 | 0.02  | -0.05 | -0.02 | -0.05 | 0.02  | 0.05 |
| 20 | 14 | 0.00 | -0.03 | 0.13  | -0.15 | 0.13  | 0.15  | 0.16 |
| 20 | 15 | 0.00 | 0.03  | -0.08 | 0.14  | -0.08 | -0.14 | 0.13 |
| 20 | 16 | 0.00 | 0.06  | -0.03 | 0     | -0.03 | 0     | 0.04 |
| 20 | 17 | 0.00 | 0.02  | 0.00  | -0.01 | 0     | 0.01  | 0.01 |
| 20 | 18 | 0.00 | 0.07  | 0.15  | -0.1  | 0.15  | 0.1   | 0.15 |
| 20 | 19 | 0.00 | -0.03 | 0.12  | -0.08 | 0.12  | 0.08  | 0.12 |
| 20 | 20 | 0.00 | -0.02 | -0.28 | -0.02 | -0.28 | 0.02  | 0.23 |
| 20 | 21 | 0.00 | -0.08 | -2.65 | 1.5   | -2.65 | -1.5  | 2.49 |
| 20 | 22 | 0.00 | -0.28 | 0.14  | -0.45 | 0.14  | 0.45  | 0.42 |
| 20 | 23 | 0.00 | -2.84 | -0.03 | -3.69 | -0.03 | 3.69  | 3.43 |
| 20 | 24 | 0.00 | -0.04 | 2.60  | -2.56 | 2.6   | 2.56  | 2.98 |
| 20 | 25 | 0.00 | 0.37  | 0.17  | 0.19  | 0.17  | -0.19 | 0.30 |
| 20 | 26 | 0.00 | 0.05  | -0.13 | 0.16  | -0.13 | -0.16 | 0.17 |
| 20 | 27 | 0.00 | -0.69 | -2.23 | 2.72  | -2.23 | -2.72 | 2.90 |
| 20 | 28 | 0.00 | -0.04 | -0.28 | 0.05  | -0.28 | -0.05 | 0.23 |
| 20 | 29 | 0.00 | -1.85 | 1.12  | -1.82 | 1.12  | 1.82  | 2.05 |
| 20 | 30 | 0.00 | -2.19 | 0.80  | 0.15  | 0.8   | -0.15 | 1.43 |
| 21 | 0  | 0.00 | -0.24 | -0.28 | -0.19 | -0.28 | 0.19  | 0.31 |
| 21 | 1  | 0.00 | -0.23 | -0.23 | 0.1   | -0.23 | -0.1  | 0.24 |
| 21 | 2  | 0.00 | 0.15  | -0.22 | 0.04  | -0.22 | -0.04 | 0.20 |
| 21 | 3  | 0.00 | 0.34  | -0.27 | 0     | -0.27 | 0     | 0.30 |
| 21 | 4  | 0.00 | 0.06  | 0.23  | 0.17  | 0.23  | -0.17 | 0.24 |
| 21 | 5  | 0.00 | -0.37 | -0.21 | -0.38 | -0.21 | 0.38  | 0.41 |
| 21 | 6  | 0.00 | -0.27 | 0.35  | -0.16 | 0.35  | 0.16  | 0.35 |
| 21 | 7  | 0.00 | -0.58 | 1.17  | -0.47 | 1.17  | 0.47  | 1.08 |
| 21 | 8  | 0.00 | -0.79 | -0.24 | -0.79 | -0.24 | 0.79  | 0.81 |
| 21 | 9  | 0.00 | 0.89  | 0.79  | 0.79  | 0.79  | -0.79 | 1.05 |
| 21 | 10 | 0.00 | 0.01  | -0.03 | 0.01  | -0.03 | -0.01 | 0.03 |
| 21 | 11 | 0.00 | -0.01 | -0.04 | 0     | -0.04 | 0     | 0.03 |
| 21 | 12 | 0.00 | 0.01  | 0.11  | -0.11 | 0.11  | 0.11  | 0.13 |
| 21 | 13 | 0.00 | 0.01  | 0.03  | 0     | 0.03  | 0     | 0.03 |
| 21 | 14 | 0.00 | -0.06 | -0.08 | 0.13  | -0.08 | -0.13 | 0.13 |
| 21 | 15 | 0.00 | -0.08 | -0.03 | 0.13  | -0.03 | -0.13 | 0.12 |
| 21 | 16 | 0.00 | 0.10  | 0.01  | -0.03 | 0.01  | 0.03  | 0.06 |
| 21 | 17 | 0.00 | 0.01  | -0.04 | 0.06  | -0.04 | -0.06 | 0.06 |
| 21 | 18 | 0.00 | -0.07 | -0.07 | 0.09  | -0.07 | -0.09 | 0.10 |
| 21 | 19 | 0.00 | 0.03  | 0.03  | 0.04  | 0.03  | -0.04 | 0.04 |



|    |    |      |       |       |       |       |       |      |
|----|----|------|-------|-------|-------|-------|-------|------|
| 21 | 20 | 0.00 | 0.04  | 0.25  | 0.13  | 0.25  | -0.13 | 0.23 |
| 21 | 21 | 0.00 | 0.38  | 1.74  | 0.5   | 1.74  | -0.5  | 1.49 |
| 21 | 22 | 0.00 | 0.10  | -0.11 | 0.3   | -0.11 | -0.3  | 0.27 |
| 21 | 23 | 0.00 | 1.68  | -0.47 | 2.96  | -0.47 | -2.96 | 2.63 |
| 21 | 24 | 0.00 | 2.15  | 5.56  | -3.14 | 5.56  | 3.14  | 5.36 |
| 21 | 25 | 0.00 | -0.38 | -0.07 | -0.1  | -0.07 | 0.1   | 0.24 |
| 21 | 26 | 0.00 | 0.16  | -0.01 | -0.14 | -0.01 | 0.14  | 0.15 |
| 21 | 27 | 0.00 | 0.52  | -0.53 | 0.1   | -0.53 | -0.1  | 0.53 |
| 21 | 28 | 0.00 | -0.10 | -0.47 | -0.01 | -0.47 | 0.01  | 0.39 |
| 21 | 29 | 0.00 | 0.77  | -0.77 | 0.83  | -0.77 | -0.83 | 1.03 |
| 21 | 30 | 0.00 | 0.22  | -0.67 | 0.78  | -0.67 | -0.78 | 0.85 |
| 22 | 0  | 0.00 | -0.33 | 0.24  | -0.5  | 0.24  | 0.5   | 0.49 |
| 22 | 1  | 0.00 | -0.12 | 0.02  | 0.15  | 0.02  | -0.15 | 0.14 |
| 22 | 2  | 0.00 | 0.11  | 0.04  | 0.01  | 0.04  | -0.01 | 0.07 |
| 22 | 3  | 0.00 | -0.08 | -0.20 | -0.08 | -0.2  | 0.08  | 0.18 |
| 22 | 4  | 0.00 | 0.09  | -0.07 | 0.02  | -0.07 | -0.02 | 0.08 |
| 22 | 5  | 0.00 | 0.08  | -0.20 | 0.1   | -0.2  | -0.1  | 0.19 |
| 22 | 6  | 0.00 | 0.00  | -0.25 | 0.2   | -0.25 | -0.2  | 0.26 |
| 22 | 7  | 0.00 | 0.18  | -0.29 | 0.36  | -0.29 | -0.36 | 0.39 |
| 22 | 8  | 0.00 | 0.25  | -0.07 | 0.27  | -0.07 | -0.27 | 0.27 |
| 22 | 9  | 0.00 | -0.42 | -0.02 | -0.25 | -0.02 | 0.25  | 0.32 |
| 22 | 10 | 0.00 | 0.06  | 0.00  | -0.15 | 0     | 0.15  | 0.13 |
| 22 | 11 | 0.00 | -0.19 | 0.08  | 0.09  | 0.08  | -0.09 | 0.15 |
| 22 | 12 | 0.00 | 0.58  | -0.19 | -0.26 | -0.19 | 0.26  | 0.43 |
| 22 | 13 | 0.00 | 0.06  | -0.01 | -0.06 | -0.01 | 0.06  | 0.06 |
| 22 | 14 | 0.00 | 0.16  | -0.10 | -0.09 | -0.1  | 0.09  | 0.14 |
| 22 | 15 | 0.00 | 0.59  | -0.14 | -0.41 | -0.14 | 0.41  | 0.49 |
| 22 | 16 | 0.00 | -0.03 | 0.00  | -0.03 | 0     | 0.03  | 0.03 |
| 22 | 17 | 0.00 | 0.00  | -0.02 | -0.04 | -0.02 | 0.04  | 0.04 |
| 22 | 18 | 0.00 | -0.08 | 0.03  | 0.02  | 0.03  | -0.02 | 0.05 |
| 22 | 19 | 0.00 | 0.11  | -0.13 | -0.02 | -0.13 | 0.02  | 0.12 |
| 22 | 20 | 0.00 | -0.01 | 0.09  | 0     | 0.09  | 0     | 0.07 |
| 22 | 21 | 0.00 | -0.09 | 0.62  | -0.06 | 0.62  | 0.06  | 0.51 |
| 22 | 22 | 0.00 | 0.07  | 0.02  | 0.12  | 0.02  | -0.12 | 0.11 |
| 22 | 23 | 0.00 | 0.92  | 0.68  | 0.47  | 0.68  | -0.47 | 0.86 |
| 22 | 24 | 0.00 | -0.36 | -2.32 | 1.36  | -2.32 | -1.36 | 2.21 |
| 22 | 25 | 0.00 | -0.08 | -0.07 | 0.01  | -0.07 | -0.01 | 0.07 |
| 22 | 26 | 0.00 | -0.01 | 0.00  | -0.1  | 0     | 0.1   | 0.08 |
| 22 | 27 | 0.00 | 0.10  | 0.92  | -0.67 | 0.92  | 0.67  | 0.93 |
| 22 | 28 | 0.00 | 0.02  | 0.16  | -0.04 | 0.16  | 0.04  | 0.14 |
| 22 | 29 | 0.00 | 0.20  | -0.15 | 0.14  | -0.15 | -0.14 | 0.20 |
| 22 | 30 | 0.00 | 0.02  | 0.00  | -0.36 | 0     | 0.36  | 0.29 |
| 23 | 0  | 0.00 | 0.53  | 0.23  | 0.27  | 0.23  | -0.27 | 0.42 |
| 23 | 1  | 0.00 | 0.22  | 0.29  | -0.24 | 0.29  | 0.24  | 0.33 |

|    |    |      |       |       |       |       |       |      |
|----|----|------|-------|-------|-------|-------|-------|------|
| 23 | 2  | 0.00 | -0.06 | 0.07  | 0.09  | 0.07  | -0.09 | 0.10 |
| 23 | 3  | 0.00 | -0.14 | 0.13  | -0.36 | 0.13  | 0.36  | 0.32 |
| 23 | 4  | 0.00 | -0.03 | 0.01  | 0.16  | 0.01  | -0.16 | 0.13 |
| 23 | 5  | 0.00 | 0.00  | 0.08  | -0.01 | 0.08  | 0.01  | 0.07 |
| 23 | 6  | 0.00 | 0.12  | -0.22 | 0.18  | -0.22 | -0.18 | 0.24 |
| 23 | 7  | 0.00 | 0.03  | -0.57 | 0.67  | -0.57 | -0.67 | 0.72 |
| 23 | 8  | 0.00 | 0.25  | -0.13 | 0.41  | -0.13 | -0.41 | 0.38 |
| 23 | 9  | 0.00 | -0.51 | -0.12 | -0.26 | -0.12 | 0.26  | 0.38 |
| 23 | 10 | 0.00 | -0.08 | 0.01  | 0.09  | 0.01  | -0.09 | 0.09 |
| 23 | 11 | 0.00 | 0.02  | -0.03 | -0.02 | -0.03 | 0.02  | 0.03 |
| 23 | 12 | 0.00 | -0.32 | 0.08  | 0.09  | 0.08  | -0.09 | 0.21 |
| 23 | 13 | 0.00 | -0.11 | 0.13  | 0.01  | 0.13  | -0.01 | 0.12 |
| 23 | 14 | 0.00 | 0.06  | -0.36 | 0.31  | -0.36 | -0.31 | 0.39 |
| 23 | 15 | 0.00 | -0.33 | 0.13  | 0.31  | 0.13  | -0.31 | 0.33 |
| 23 | 16 | 0.00 | 0.11  | -0.02 | -0.01 | -0.02 | 0.01  | 0.07 |
| 23 | 17 | 0.00 | 0.02  | -0.09 | -0.03 | -0.09 | 0.03  | 0.08 |
| 23 | 18 | 0.00 | 0.03  | 0.13  | -0.02 | 0.13  | 0.02  | 0.11 |
| 23 | 19 | 0.00 | 0.01  | -0.11 | 0.05  | -0.11 | -0.05 | 0.10 |
| 23 | 20 | 0.00 | -0.14 | -0.35 | -0.16 | -0.35 | 0.16  | 0.32 |
| 23 | 21 | 0.00 | -1.05 | -2.29 | -1.21 | -2.29 | 1.21  | 2.20 |
| 23 | 22 | 0.00 | -0.14 | -0.06 | -0.22 | -0.06 | 0.22  | 0.20 |
| 23 | 23 | 0.00 | -2.34 | -0.63 | -2.54 | -0.63 | 2.54  | 2.53 |
| 23 | 24 | 0.00 | -1.63 | -4.03 | 1.28  | -4.03 | -1.28 | 3.58 |
| 23 | 25 | 0.00 | 0.50  | 0.18  | 0.18  | 0.18  | -0.18 | 0.36 |
| 23 | 26 | 0.00 | -0.10 | -0.02 | 0.07  | -0.02 | -0.07 | 0.08 |
| 23 | 27 | 0.00 | -0.82 | 0.24  | -0.15 | 0.24  | 0.15  | 0.53 |
| 23 | 28 | 0.00 | 0.03  | 0.27  | -0.05 | 0.27  | 0.05  | 0.22 |
| 23 | 29 | 0.00 | -0.55 | 0.25  | -0.32 | 0.25  | 0.32  | 0.46 |
| 23 | 30 | 0.00 | 0.61  | 1.08  | 0     | 1.08  | 0     | 0.95 |
| 24 | 0  | 0.00 | 0.17  | -0.08 | -0.22 | -0.08 | 0.22  | 0.21 |
| 24 | 1  | 0.00 | 0.07  | -0.35 | -0.18 | -0.35 | 0.18  | 0.32 |
| 24 | 2  | 0.00 | 0.28  | -0.38 | 0.27  | -0.38 | -0.27 | 0.41 |
| 24 | 3  | 0.00 | -0.15 | -0.31 | 0.36  | -0.31 | -0.36 | 0.40 |
| 24 | 4  | 0.00 | 0.12  | 0.12  | -0.05 | 0.12  | 0.05  | 0.13 |
| 24 | 5  | 0.00 | -0.21 | -0.14 | 0.21  | -0.14 | -0.21 | 0.24 |
| 24 | 6  | 0.00 | 0.10  | -0.03 | 0.11  | -0.03 | -0.11 | 0.11 |
| 24 | 7  | 0.00 | 0.08  | 0.35  | -0.28 | 0.35  | 0.28  | 0.37 |
| 24 | 8  | 0.00 | -0.38 | -0.05 | -0.21 | -0.05 | 0.21  | 0.28 |
| 24 | 9  | 0.00 | -0.05 | 0.11  | 0.08  | 0.11  | -0.08 | 0.11 |
| 24 | 10 | 0.00 | 0.00  | -0.04 | 0.22  | -0.04 | -0.22 | 0.18 |
| 24 | 11 | 0.00 | -0.29 | -0.12 | 0.27  | -0.12 | -0.27 | 0.29 |
| 24 | 12 | 0.00 | -0.12 | 0.00  | -0.08 | 0     | 0.08  | 0.10 |
| 24 | 13 | 0.00 | -0.12 | -0.09 | 0.31  | -0.09 | -0.31 | 0.27 |
| 24 | 14 | 0.00 | 0.41  | 0.44  | -0.98 | 0.44  | 0.98  | 0.91 |

---

|    |    |      |       |       |       |       |       |      |
|----|----|------|-------|-------|-------|-------|-------|------|
| 24 | 15 | 0.00 | 0.07  | 0.02  | 0.09  | 0.02  | -0.09 | 0.09 |
| 24 | 16 | 0.00 | -0.08 | 0.08  | 0.02  | 0.08  | -0.02 | 0.08 |
| 24 | 17 | 0.00 | 0.03  | 0.02  | -0.17 | 0.02  | 0.17  | 0.14 |
| 24 | 18 | 0.00 | 0.16  | 0.02  | 0.1   | 0.02  | -0.1  | 0.12 |
| 24 | 19 | 0.00 | 0.34  | 0.01  | -0.27 | 0.01  | 0.27  | 0.30 |
| 24 | 20 | 0.00 | -0.38 | -0.32 | -0.44 | -0.32 | 0.44  | 0.50 |
| 24 | 21 | 0.00 | -2.69 | -2.55 | -3.18 | -2.55 | 3.18  | 3.67 |
| 24 | 22 | 0.00 | -0.15 | -0.51 | 0     | -0.51 | 0     | 0.43 |
| 24 | 23 | 0.00 | -2.33 | -3.75 | -0.68 | -3.75 | 0.68  | 3.39 |
| 24 | 24 | 0.00 | -0.78 | 0.51  | -1.35 | 0.51  | 1.35  | 1.26 |
| 24 | 25 | 0.00 | 0.66  | 0.43  | 0.26  | 0.43  | -0.26 | 0.56 |
| 24 | 26 | 0.00 | -0.06 | 0.06  | -0.09 | 0.06  | 0.09  | 0.09 |
| 24 | 27 | 0.00 | -2.18 | -0.12 | -1.31 | -0.12 | 1.31  | 1.65 |
| 24 | 28 | 0.00 | -0.08 | -0.07 | 0.21  | -0.07 | -0.21 | 0.19 |
| 24 | 29 | 0.00 | 0.35  | -0.57 | 0.85  | -0.57 | -0.85 | 0.86 |
| 24 | 30 | 0.00 | 1.82  | 0.74  | 1.12  | 0.74  | -1.12 | 1.52 |
| 25 | 0  | 0.00 | -0.38 | -0.12 | 0.13  | -0.12 | -0.13 | 0.26 |
| 25 | 1  | 0.00 | -0.40 | -0.60 | 0.54  | -0.6  | -0.54 | 0.70 |
| 25 | 2  | 0.00 | 0.19  | -0.31 | 0.27  | -0.31 | -0.27 | 0.35 |
| 25 | 3  | 0.00 | -0.19 | -0.73 | 0.23  | -0.73 | -0.23 | 0.63 |
| 25 | 4  | 0.00 | -0.01 | 0.24  | -0.26 | 0.24  | 0.26  | 0.29 |
| 25 | 5  | 0.00 | 0.05  | -0.54 | 0.29  | -0.54 | -0.29 | 0.50 |
| 25 | 6  | 0.00 | -0.08 | -0.48 | 0.34  | -0.48 | -0.34 | 0.48 |
| 25 | 7  | 0.00 | 0.20  | -0.09 | 0.12  | -0.09 | -0.12 | 0.17 |
| 25 | 8  | 0.00 | 0.51  | -0.06 | 0.27  | -0.06 | -0.27 | 0.37 |
| 25 | 9  | 0.00 | -0.07 | -0.22 | -0.03 | -0.22 | 0.03  | 0.19 |
| 25 | 10 | 0.00 | -0.09 | -0.01 | -0.07 | -0.01 | 0.07  | 0.08 |
| 25 | 11 | 0.00 | 0.08  | -0.11 | 0.03  | -0.11 | -0.03 | 0.10 |
| 25 | 12 | 0.00 | -0.18 | 0.12  | 0.26  | 0.12  | -0.26 | 0.26 |
| 25 | 13 | 0.00 | -0.02 | -0.12 | 0.15  | -0.12 | -0.15 | 0.16 |
| 25 | 14 | 0.00 | 0.20  | 0.38  | -0.63 | 0.38  | 0.63  | 0.61 |
| 25 | 15 | 0.00 | -0.42 | 0.02  | 0.29  | 0.02  | -0.29 | 0.34 |
| 25 | 16 | 0.00 | -0.20 | -0.02 | -0.1  | -0.02 | 0.1   | 0.14 |
| 25 | 17 | 0.00 | 0.01  | 0.07  | -0.06 | 0.07  | 0.06  | 0.08 |
| 25 | 18 | 0.00 | -0.13 | -0.11 | 0.09  | -0.11 | -0.09 | 0.14 |
| 25 | 19 | 0.00 | 0.12  | -0.07 | -0.1  | -0.07 | 0.1   | 0.12 |
| 25 | 20 | 0.00 | -0.02 | 0.34  | 0.12  | 0.34  | -0.12 | 0.29 |
| 25 | 21 | 0.00 | 0.28  | 2.66  | -0.82 | 2.66  | 0.82  | 2.28 |
| 25 | 22 | 0.00 | 0.40  | -0.15 | 0.54  | -0.15 | -0.54 | 0.51 |
| 25 | 23 | 0.00 | 3.61  | 0.31  | 3.76  | 0.31  | -3.76 | 3.72 |
| 25 | 24 | 0.00 | 0.34  | -1.27 | 1.43  | -1.27 | -1.43 | 1.57 |
| 25 | 25 | 0.00 | -0.45 | -0.18 | -0.15 | -0.18 | 0.15  | 0.32 |
| 25 | 26 | 0.00 | -0.05 | 0.05  | -0.31 | 0.05  | 0.31  | 0.26 |
| 25 | 27 | 0.00 | -0.17 | 1.95  | -2.34 | 1.95  | 2.34  | 2.49 |

---

---

|    |    |      |       |       |       |       |       |      |
|----|----|------|-------|-------|-------|-------|-------|------|
| 25 | 28 | 0.00 | 0.02  | 0.09  | -0.04 | 0.09  | 0.04  | 0.08 |
| 25 | 29 | 0.00 | 1.25  | -1.18 | 1.53  | -1.18 | -1.53 | 1.73 |
| 25 | 30 | 0.00 | 0.95  | -0.73 | -0.22 | -0.73 | 0.22  | 0.83 |
| 26 | 0  | 0.00 | -0.04 | 0.04  | 0.1   | 0.04  | -0.1  | 0.09 |
| 26 | 1  | 0.00 | 0.17  | 0.34  | -0.06 | 0.34  | 0.06  | 0.30 |
| 26 | 2  | 0.00 | -0.36 | 0.36  | -0.3  | 0.36  | 0.3   | 0.44 |
| 26 | 3  | 0.00 | 0.09  | 0.36  | -0.49 | 0.36  | 0.49  | 0.50 |
| 26 | 4  | 0.00 | -0.03 | -0.15 | 0.18  | -0.15 | -0.18 | 0.19 |
| 26 | 5  | 0.00 | 0.14  | 0.22  | -0.13 | 0.22  | 0.13  | 0.22 |
| 26 | 6  | 0.00 | 0.01  | -0.05 | 0.02  | -0.05 | -0.02 | 0.04 |
| 26 | 7  | 0.00 | -0.15 | -0.31 | 0.32  | -0.31 | -0.32 | 0.37 |
| 26 | 8  | 0.00 | 0.17  | -0.02 | 0.13  | -0.02 | -0.13 | 0.15 |
| 26 | 9  | 0.00 | -0.04 | -0.06 | -0.16 | -0.06 | 0.16  | 0.14 |
| 26 | 10 | 0.00 | -0.04 | -0.08 | 0.03  | -0.08 | -0.03 | 0.07 |
| 26 | 11 | 0.00 | -0.18 | -0.19 | 0.39  | -0.19 | -0.39 | 0.37 |
| 26 | 12 | 0.00 | 0.15  | 0.18  | -0.37 | 0.18  | 0.37  | 0.35 |
| 26 | 13 | 0.00 | -0.07 | -0.17 | 0.26  | -0.17 | -0.26 | 0.26 |
| 26 | 14 | 0.00 | 0.53  | 0.70  | -1.29 | 0.7   | 1.29  | 1.24 |
| 26 | 15 | 0.00 | 0.00  | -0.14 | 0.13  | -0.14 | -0.13 | 0.16 |
| 26 | 16 | 0.00 | 0.17  | -0.05 | -0.02 | -0.05 | 0.02  | 0.11 |
| 26 | 17 | 0.00 | 0.06  | 0.09  | -0.12 | 0.09  | 0.12  | 0.13 |
| 26 | 18 | 0.00 | -0.10 | 0.08  | -0.05 | 0.08  | 0.05  | 0.10 |
| 26 | 19 | 0.00 | 0.23  | -0.03 | -0.37 | -0.03 | 0.37  | 0.33 |
| 26 | 20 | 0.00 | 0.22  | 0.00  | 0.17  | 0     | -0.17 | 0.19 |
| 26 | 21 | 0.00 | 1.32  | 0.35  | 1.63  | 0.35  | -1.63 | 1.56 |
| 26 | 22 | 0.00 | -0.13 | 0.23  | -0.06 | 0.23  | 0.06  | 0.21 |
| 26 | 23 | 0.00 | -0.15 | 1.83  | -1.02 | 1.83  | 1.02  | 1.71 |
| 26 | 24 | 0.00 | 0.00  | -0.87 | 0.7   | -0.87 | -0.7  | 0.91 |
| 26 | 25 | 0.00 | -0.20 | -0.13 | -0.08 | -0.13 | 0.08  | 0.17 |
| 26 | 26 | 0.00 | 0.01  | -0.06 | 0.2   | -0.06 | -0.2  | 0.17 |
| 26 | 27 | 0.00 | 1.19  | -0.36 | 1.23  | -0.36 | -1.23 | 1.25 |
| 26 | 28 | 0.00 | 0.04  | -0.03 | 0.04  | -0.03 | -0.04 | 0.05 |
| 26 | 29 | 0.00 | -0.51 | 0.61  | -0.75 | 0.61  | 0.75  | 0.84 |
| 26 | 30 | 0.00 | -0.96 | 0.01  | -0.66 | 0.01  | 0.66  | 0.77 |
| 27 | 0  | 0.00 | -0.56 | -0.12 | -0.02 | -0.12 | 0.02  | 0.34 |
| 27 | 1  | 0.00 | 0.35  | 0.04  | 0.28  | 0.04  | -0.28 | 0.31 |
| 27 | 2  | 0.00 | -0.13 | 0.52  | -0.6  | 0.52  | 0.6   | 0.65 |
| 27 | 3  | 0.00 | -0.22 | -0.12 | 0.01  | -0.12 | -0.01 | 0.16 |
| 27 | 4  | 0.00 | -0.73 | -0.15 | -0.46 | -0.15 | 0.46  | 0.58 |
| 27 | 5  | 0.00 | -0.30 | -0.22 | -0.12 | -0.22 | 0.12  | 0.27 |
| 27 | 6  | 0.00 | -0.07 | 0.04  | -0.06 | 0.04  | 0.06  | 0.07 |
| 27 | 7  | 0.00 | 0.04  | -0.02 | 0.04  | -0.02 | -0.04 | 0.04 |
| 27 | 8  | 0.00 | 0.10  | 0.08  | 0.04  | 0.08  | -0.04 | 0.09 |
| 27 | 9  | 0.00 | 0.09  | 0.02  | 0.02  | 0.02  | -0.02 | 0.06 |

---

---

|    |    |      |       |       |       |       |       |      |
|----|----|------|-------|-------|-------|-------|-------|------|
| 27 | 10 | 0.00 | 0.04  | -0.04 | -0.06 | -0.04 | 0.06  | 0.06 |
| 27 | 11 | 0.00 | 0.06  | -0.06 | -0.09 | -0.06 | 0.09  | 0.09 |
| 27 | 12 | 0.00 | -0.06 | 0.01  | 0.07  | 0.01  | -0.07 | 0.07 |
| 27 | 13 | 0.00 | -0.04 | -0.04 | -0.1  | -0.04 | 0.1   | 0.09 |
| 27 | 14 | 0.00 | -0.18 | 0.11  | 0.38  | 0.11  | -0.38 | 0.34 |
| 27 | 15 | 0.00 | 0.02  | 0.00  | 0     | 0     | 0     | 0.01 |
| 27 | 16 | 0.00 | -0.02 | 0.00  | -0.02 | 0     | 0.02  | 0.02 |
| 27 | 17 | 0.00 | -0.05 | 0.05  | 0.07  | 0.05  | -0.07 | 0.08 |
| 27 | 18 | 0.00 | 0.05  | -0.02 | 0     | -0.02 | 0     | 0.03 |
| 27 | 19 | 0.00 | -0.03 | 0.01  | 0.03  | 0.01  | -0.03 | 0.03 |
| 27 | 20 | 0.00 | -0.04 | -0.13 | -0.05 | -0.13 | 0.05  | 0.12 |
| 27 | 21 | 0.00 | -0.51 | -0.15 | -0.51 | -0.15 | 0.51  | 0.52 |
| 27 | 22 | 0.00 | -1.38 | 0.05  | 0.08  | 0.05  | -0.08 | 0.80 |
| 27 | 23 | 0.00 | -0.61 | -1.42 | -0.22 | -1.42 | 0.22  | 1.22 |
| 27 | 24 | 0.00 | -0.38 | -0.62 | -0.13 | -0.62 | 0.13  | 0.56 |
| 27 | 25 | 0.00 | -0.10 | 0.37  | 0.08  | 0.37  | -0.08 | 0.31 |
| 27 | 26 | 0.00 | -0.07 | -0.03 | -0.03 | -0.03 | 0.03  | 0.05 |
| 27 | 27 | 0.00 | -0.70 | -0.74 | -0.44 | -0.74 | 0.44  | 0.81 |
| 27 | 28 | 0.00 | -0.05 | 0.04  | 0.02  | 0.04  | -0.02 | 0.05 |
| 27 | 29 | 0.00 | 0.18  | 1.19  | -0.2  | 1.19  | 0.2   | 0.99 |
| 27 | 30 | 0.00 | 0.37  | -0.07 | 0.13  | -0.07 | -0.13 | 0.25 |
| 28 | 0  | 0.00 | -0.36 | 0.23  | -0.11 | 0.23  | 0.11  | 0.29 |
| 28 | 1  | 0.00 | -0.09 | -0.12 | -0.01 | -0.12 | 0.01  | 0.11 |
| 28 | 2  | 0.00 | 0.00  | -0.15 | 0.11  | -0.15 | -0.11 | 0.15 |
| 28 | 3  | 0.00 | 0.22  | 0.00  | 0.3   | 0     | -0.3  | 0.28 |
| 28 | 4  | 0.00 | 0.14  | 0.02  | 0.08  | 0.02  | -0.08 | 0.11 |
| 28 | 5  | 0.00 | -0.05 | 0.06  | -0.06 | 0.06  | 0.06  | 0.08 |
| 28 | 6  | 0.00 | -0.09 | 0.29  | -0.26 | 0.29  | 0.26  | 0.32 |
| 28 | 7  | 0.00 | -0.07 | 0.48  | -0.45 | 0.48  | 0.45  | 0.54 |
| 28 | 8  | 0.00 | -0.37 | 0.15  | -0.51 | 0.15  | 0.51  | 0.48 |
| 28 | 9  | 0.00 | 0.55  | 0.16  | 0.25  | 0.16  | -0.25 | 0.40 |
| 28 | 10 | 0.00 | -0.17 | 0.09  | 0.06  | 0.09  | -0.06 | 0.13 |
| 28 | 11 | 0.00 | -0.11 | 0.18  | 0.06  | 0.18  | -0.06 | 0.17 |
| 28 | 12 | 0.00 | 0.03  | -0.06 | 0.08  | -0.06 | -0.08 | 0.08 |
| 28 | 13 | 0.00 | -0.09 | 0.07  | 0.06  | 0.07  | -0.06 | 0.09 |
| 28 | 14 | 0.00 | 0.47  | -0.49 | -0.08 | -0.49 | 0.08  | 0.49 |
| 28 | 15 | 0.00 | -0.13 | 0.06  | 0.02  | 0.06  | -0.02 | 0.09 |
| 28 | 16 | 0.00 | -0.09 | 0.02  | 0     | 0.02  | 0     | 0.05 |
| 28 | 17 | 0.00 | 0.40  | -0.15 | -0.36 | -0.15 | 0.36  | 0.39 |
| 28 | 18 | 0.00 | 0.03  | -0.03 | 0     | -0.03 | 0     | 0.03 |
| 28 | 19 | 0.00 | -0.01 | -0.01 | -0.01 | -0.01 | 0.01  | 0.01 |
| 28 | 20 | 0.00 | 0.03  | 0.08  | 0.04  | 0.08  | -0.04 | 0.08 |
| 28 | 21 | 0.00 | 0.28  | 0.33  | 0.28  | 0.33  | -0.28 | 0.39 |
| 28 | 22 | 0.00 | 0.07  | -0.03 | 0.06  | -0.03 | -0.06 | 0.07 |

---

|    |    |      |       |       |       |       |       |      |
|----|----|------|-------|-------|-------|-------|-------|------|
| 28 | 23 | 0.00 | 0.43  | -0.36 | 0.79  | -0.36 | -0.79 | 0.75 |
| 28 | 24 | 0.00 | 0.86  | 3.01  | -1.51 | 3.01  | 1.51  | 2.79 |
| 28 | 25 | 0.00 | -0.08 | -0.03 | -0.04 | -0.03 | 0.04  | 0.06 |
| 28 | 26 | 0.00 | 0.03  | -0.01 | -0.03 | -0.01 | 0.03  | 0.03 |
| 28 | 27 | 0.00 | -0.12 | -0.54 | 0.3   | -0.54 | -0.3  | 0.51 |
| 28 | 28 | 0.00 | -0.13 | -0.22 | -0.02 | -0.22 | 0.02  | 0.20 |
| 28 | 29 | 0.00 | -0.04 | -0.25 | 0.12  | -0.25 | -0.12 | 0.23 |
| 28 | 30 | 0.00 | -0.21 | -0.41 | 0.24  | -0.41 | -0.24 | 0.41 |
| 29 | 0  | 0.00 | -7.60 | -3.86 | -1.24 | -3.86 | 1.24  | 5.50 |
| 29 | 1  | 0.00 | 3.82  | 2.79  | 2.55  | 2.79  | -2.55 | 3.79 |
| 29 | 2  | 0.00 | -2.45 | 6.89  | -5.72 | 6.89  | 5.72  | 7.45 |
| 29 | 3  | 0.00 | -1.62 | -1.56 | -1.39 | -1.56 | 1.39  | 1.95 |
| 29 | 4  | 0.00 | -8.47 | -5.80 | -6.66 | -5.8  | 6.66  | 8.71 |
| 29 | 5  | 0.00 | -2.87 | -2.75 | -2.19 | -2.75 | 2.19  | 3.31 |
| 29 | 6  | 0.00 | -1.48 | 0.78  | -1.48 | 0.78  | 1.48  | 1.61 |
| 29 | 7  | 0.00 | 0.28  | -0.68 | 0.38  | -0.68 | -0.38 | 0.66 |
| 29 | 8  | 0.00 | 1.52  | 1.53  | 0.89  | 1.53  | -0.89 | 1.69 |
| 29 | 9  | 0.00 | 1.24  | 1.20  | 0.69  | 1.2   | -0.69 | 1.34 |
| 29 | 10 | 0.00 | -0.07 | -0.01 | -0.06 | -0.01 | 0.06  | 0.06 |
| 29 | 11 | 0.00 | 0.01  | 0.07  | 0.44  | 0.07  | -0.44 | 0.36 |
| 29 | 12 | 0.00 | 0.18  | 0.15  | 0.01  | 0.15  | -0.01 | 0.16 |
| 29 | 13 | 0.00 | -0.36 | -0.64 | -0.57 | -0.64 | 0.57  | 0.73 |
| 29 | 14 | 0.00 | -0.12 | -0.20 | -0.04 | -0.2  | 0.04  | 0.18 |
| 29 | 15 | 0.00 | -0.29 | -0.02 | 0.36  | -0.02 | -0.36 | 0.34 |
| 29 | 16 | 0.00 | -0.06 | 0.07  | 0.08  | 0.07  | -0.08 | 0.09 |
| 29 | 17 | 0.00 | 0.03  | 0.01  | -0.03 | 0.01  | 0.03  | 0.03 |
| 29 | 18 | 0.00 | -0.12 | 0.17  | 0.22  | 0.17  | -0.22 | 0.24 |
| 29 | 19 | 0.00 | 0.03  | -0.02 | -0.04 | -0.02 | 0.04  | 0.04 |
| 29 | 20 | 0.00 | 0.48  | -0.55 | 0.02  | -0.55 | -0.02 | 0.53 |
| 29 | 21 | 0.00 | 0.02  | 0.13  | 0.04  | 0.13  | -0.04 | 0.11 |
| 29 | 22 | 0.00 | 0.06  | 0.14  | -0.13 | 0.14  | 0.13  | 0.16 |
| 29 | 23 | 0.00 | 0.38  | 0.33  | -2.12 | 0.33  | 2.12  | 1.77 |
| 29 | 24 | 0.00 | 0.75  | -0.22 | -1.48 | -0.22 | 1.48  | 1.30 |
| 29 | 25 | 0.00 | 0.10  | 0.36  | 0.51  | 0.36  | -0.51 | 0.51 |
| 29 | 26 | 0.00 | 0.33  | -0.28 | -0.31 | -0.28 | 0.31  | 0.39 |
| 29 | 27 | 0.00 | 2.02  | -0.33 | -1.59 | -0.33 | 1.59  | 1.77 |
| 29 | 28 | 0.00 | 0.14  | 0.20  | 0.09  | 0.2   | -0.09 | 0.20 |
| 29 | 29 | 0.00 | 1.39  | 0.86  | -2.59 | 0.86  | 2.59  | 2.37 |
| 29 | 30 | 0.00 | 0.49  | -1.06 | -0.67 | -1.06 | 0.67  | 1.06 |
| 30 | 0  | 0.00 | -1.74 | -2.38 | -0.28 | -2.38 | 0.28  | 2.20 |
| 30 | 1  | 0.00 | 2.21  | 1.70  | 1.23  | 1.7   | -1.23 | 2.14 |
| 30 | 2  | 0.00 | -1.50 | 3.82  | -3.32 | 3.82  | 3.32  | 4.22 |
| 30 | 3  | 0.00 | -0.72 | -1.15 | -0.22 | -1.15 | 0.22  | 1.04 |
| 30 | 4  | 0.00 | -4.16 | -2.74 | -3.54 | -2.74 | 3.54  | 4.37 |

|    |    |      |       |       |       |       |       |      |
|----|----|------|-------|-------|-------|-------|-------|------|
| 30 | 5  | 0.00 | -1.32 | -1.49 | -0.83 | -1.49 | 0.83  | 1.59 |
| 30 | 6  | 0.00 | -0.88 | 0.69  | -0.99 | 0.69  | 0.99  | 1.11 |
| 30 | 7  | 0.00 | 0.40  | -0.40 | 0.49  | -0.4  | -0.49 | 0.57 |
| 30 | 8  | 0.00 | 0.40  | 0.52  | 0.1   | 0.52  | -0.1  | 0.49 |
| 30 | 9  | 0.00 | 0.35  | 0.49  | 0.11  | 0.49  | -0.11 | 0.46 |
| 30 | 10 | 0.00 | -0.13 | 0.00  | -0.03 | 0     | 0.03  | 0.08 |
| 30 | 11 | 0.00 | 0.38  | -0.01 | 0.19  | -0.01 | -0.19 | 0.27 |
| 30 | 12 | 0.00 | -0.11 | 0.08  | 0.07  | 0.08  | -0.07 | 0.11 |
| 30 | 13 | 0.00 | -0.18 | -0.35 | -0.28 | -0.35 | 0.28  | 0.38 |
| 30 | 14 | 0.00 | 0.15  | -0.13 | -0.04 | -0.13 | 0.04  | 0.14 |
| 30 | 15 | 0.00 | 0.51  | -0.12 | 0.15  | -0.12 | -0.15 | 0.33 |
| 30 | 16 | 0.00 | 0.02  | 0.03  | 0.03  | 0.03  | -0.03 | 0.04 |
| 30 | 17 | 0.00 | -0.06 | 0.02  | -0.02 | 0.02  | 0.02  | 0.04 |
| 30 | 18 | 0.00 | -0.08 | 0.13  | 0.15  | 0.13  | -0.15 | 0.17 |
| 30 | 19 | 0.00 | 0.01  | 0.00  | -0.01 | 0     | 0.01  | 0.01 |
| 30 | 20 | 0.00 | 0.00  | -0.27 | 0.03  | -0.27 | -0.03 | 0.22 |
| 30 | 21 | 0.00 | 0.09  | -0.10 | -0.5  | -0.1  | 0.5   | 0.42 |
| 30 | 22 | 0.00 | 0.08  | -0.07 | 0.08  | -0.07 | -0.08 | 0.10 |
| 30 | 23 | 0.00 | 0.35  | -0.69 | -0.41 | -0.69 | 0.41  | 0.69 |
| 30 | 24 | 0.00 | 0.06  | -0.26 | -0.91 | -0.26 | 0.91  | 0.77 |
| 30 | 25 | 0.00 | 0.25  | 0.18  | 0.24  | 0.18  | -0.24 | 0.28 |
| 30 | 26 | 0.00 | -0.11 | 0.50  | 0.29  | 0.5   | -0.29 | 0.48 |
| 30 | 27 | 0.00 | -0.35 | 0.33  | -1.95 | 0.33  | 1.95  | 1.63 |
| 30 | 28 | 0.00 | 0.10  | -0.02 | -0.16 | -0.02 | 0.16  | 0.14 |
| 30 | 29 | 0    | 0.42  | 0.84  | -1.76 | 0.84  | 1.76  | 1.61 |
| 30 | 30 | 0    | 1.35  | -0.62 | -0.11 | -0.62 | 0.11  | 0.93 |

**Table S6.** The TDMs of Gaq<sub>3</sub> calculated at the level of B3LYP/def2-SVP.

| State | $\mu_x/\text{a.u.}$ | $\mu_y/\text{a.u.}$ | $\mu_z/\text{a.u.}$ | u/debye  |
|-------|---------------------|---------------------|---------------------|----------|
| 1     | 0.143730            | -0.168230           | -0.030810           | 0.567897 |
| 2     | -0.088670           | 0.404350            | 0.081930            | 1.072712 |
| 3     | -0.235670           | -0.906740           | -0.178800           | 2.4245   |
| 4     | -0.694340           | 0.057330            | 0.158060            | 1.816027 |
| 5     | 0.275630            | -0.314660           | -0.198390           | 1.176866 |
| 6     | 0.251820            | -0.448800           | -0.076670           | 1.322597 |
| 7     | 0.042500            | -0.329930           | -0.103490           | 0.885587 |
| 8     | 0.317580            | 0.283480            | 0.010330            | 1.082456 |
| 9     | -0.018680           | 0.021510            | 0.071490            | 0.195585 |
| 10    | -0.329610           | -0.094100           | 0.058410            | 0.883907 |
| 11    | 0.060710            | -0.162080           | 0.229950            | 0.731593 |
| 12    | -0.174590           | 0.097960            | 0.210810            | 0.739018 |
| 13    | 0.291980            | -0.101040           | 0.434560            | 1.355389 |

|    |           |           |           |          |
|----|-----------|-----------|-----------|----------|
| 14 | -0.388370 | -0.060730 | 0.077210  | 1.018324 |
| 15 | 0.107180  | -0.117410 | 0.331600  | 0.934786 |
| 16 | 0.017000  | -0.046370 | -0.028180 | 0.144447 |
| 17 | -0.015560 | -0.111970 | 0.001380  | 0.28737  |
| 18 | 0.133370  | 0.163990  | -0.018310 | 0.539359 |
| 19 | 0.044030  | 0.025510  | 0.012300  | 0.133061 |
| 20 | 0.015040  | -0.016140 | 0.061890  | 0.167077 |
| 21 | -0.099190 | 0.035080  | -0.144030 | 0.453375 |
| 22 | 0.004630  | -0.058340 | -0.030340 | 0.167656 |
| 23 | 0.061780  | -0.006650 | 0.006240  | 0.158748 |
| 24 | -0.084140 | -0.038180 | 0.023440  | 0.242358 |
| 25 | 0.030860  | -0.138610 | -0.002410 | 0.361018 |
| 26 | -0.113720 | 0.108410  | -0.136100 | 0.528406 |
| 27 | -0.052290 | 0.077570  | -0.129260 | 0.405606 |
| 28 | 0.025200  | 0.029600  | -0.103750 | 0.281692 |
| 29 | 0.163890  | 0.110550  | -0.068520 | 0.53188  |
| 30 | 0.016750  | -0.109570 | -0.087190 | 0.358503 |

**Table S7.** The SOCs of Gaq<sub>3</sub> calculated at the level of B3LYP/def2-SVP.

| Roots          |                | <T <sub>n</sub>  HSO S <sub>n</sub> > elements (Rm, Im) /cm <sup>-1</sup> |       |       |       |       |       | SOC/cm <sup>-1</sup> |
|----------------|----------------|---------------------------------------------------------------------------|-------|-------|-------|-------|-------|----------------------|
| T <sub>n</sub> | S <sub>n</sub> | Ms=0                                                                      | Ms=0  | Ms=1  | Ms=-1 | Ms=1  | Ms=1  |                      |
| 1              | 0              | 0.00                                                                      | 0.44  | -0.01 | 0.24  | -0.01 | -0.24 | 0.32                 |
| 1              | 1              | 0.00                                                                      | -1.07 | 0.14  | 1.01  | 0.14  | -1.01 | 1.04                 |
| 1              | 2              | 0.00                                                                      | -0.38 | 0.03  | 0.38  | 0.03  | -0.38 | 0.38                 |
| 1              | 3              | 0.00                                                                      | -0.06 | 0.37  | -0.12 | 0.37  | 0.12  | 0.32                 |
| 1              | 4              | 0.00                                                                      | 0.08  | -0.63 | 0.24  | -0.63 | -0.24 | 0.55                 |
| 1              | 5              | 0.00                                                                      | 0.32  | -1.19 | 0.30  | -1.19 | -0.30 | 1.02                 |
| 1              | 6              | 0.00                                                                      | 0.56  | -1.06 | -0.05 | -1.06 | 0.05  | 0.92                 |
| 1              | 7              | 0.00                                                                      | -1.10 | 1.68  | 0.32  | 1.68  | -0.32 | 1.53                 |
| 1              | 8              | 0.00                                                                      | 0.04  | 0.52  | -0.42 | 0.52  | 0.42  | 0.55                 |
| 1              | 9              | 0.00                                                                      | 0.34  | 0.18  | -0.55 | 0.18  | 0.55  | 0.51                 |
| 1              | 10             | 0.00                                                                      | 0.05  | 0.05  | -0.18 | 0.05  | 0.18  | 0.16                 |
| 1              | 11             | 0.00                                                                      | 0.01  | 0.05  | -0.09 | 0.05  | 0.09  | 0.08                 |
| 1              | 12             | 0.00                                                                      | 0.03  | -0.22 | -0.07 | -0.22 | 0.07  | 0.19                 |
| 1              | 13             | 0.00                                                                      | 0.04  | -0.04 | -0.05 | -0.04 | 0.05  | 0.06                 |
| 1              | 14             | 0.00                                                                      | -0.06 | 0.05  | 0.11  | 0.05  | -0.11 | 0.10                 |
| 1              | 15             | 0.00                                                                      | 0.01  | 0.09  | 0.04  | 0.09  | -0.04 | 0.08                 |
| 1              | 16             | 0.00                                                                      | 0.01  | -0.02 | 0.00  | -0.02 | 0.00  | 0.02                 |
| 1              | 17             | 0.00                                                                      | -0.07 | 0.19  | -0.01 | 0.19  | 0.01  | 0.16                 |
| 1              | 18             | 0.00                                                                      | -0.01 | 0.00  | 0.01  | 0.00  | -0.01 | 0.01                 |
| 1              | 19             | 0.00                                                                      | -0.13 | -0.16 | 0.13  | -0.16 | -0.13 | 0.18                 |



|   |    |      |       |       |       |       |       |      |
|---|----|------|-------|-------|-------|-------|-------|------|
| 1 | 20 | 0.00 | -0.03 | -0.01 | 0.03  | -0.01 | -0.03 | 0.03 |
| 1 | 21 | 0.00 | -0.01 | -0.01 | -0.01 | -0.01 | 0.01  | 0.01 |
| 1 | 22 | 0.00 | -1.13 | -3.71 | 3.89  | -3.71 | -3.89 | 4.44 |
| 1 | 23 | 0.00 | -1.61 | -6.30 | 5.96  | -6.30 | -5.96 | 7.14 |
| 1 | 24 | 0.00 | 0.00  | -0.09 | 0.04  | -0.09 | -0.04 | 0.08 |
| 1 | 25 | 0.00 | 0.10  | 0.00  | -0.13 | 0.00  | 0.13  | 0.12 |
| 1 | 26 | 0.00 | -0.10 | 0.20  | -0.05 | 0.20  | 0.05  | 0.18 |
| 1 | 27 | 0.00 | -0.25 | 0.65  | 0.03  | 0.65  | -0.03 | 0.55 |
| 1 | 28 | 0.00 | 0.88  | -1.58 | -0.09 | -1.58 | 0.09  | 1.39 |
| 1 | 29 | 0.00 | -2.35 | 5.35  | -0.14 | 5.35  | 0.14  | 4.58 |
| 1 | 30 | 0.00 | -1.11 | 2.89  | -0.14 | 2.89  | 0.14  | 2.45 |
| 2 | 0  | 0.00 | 0.01  | -0.39 | -0.02 | -0.39 | 0.02  | 0.32 |
| 2 | 1  | 0.00 | 0.64  | 0.01  | -0.59 | 0.01  | 0.59  | 0.61 |
| 2 | 2  | 0.00 | 0.08  | -0.09 | -0.57 | -0.09 | 0.57  | 0.47 |
| 2 | 3  | 0.00 | -0.25 | -0.11 | 0.04  | -0.11 | -0.04 | 0.17 |
| 2 | 4  | 0.00 | -0.47 | -0.12 | -0.46 | -0.12 | 0.46  | 0.47 |
| 2 | 5  | 0.00 | 0.44  | 0.17  | -0.09 | 0.17  | 0.09  | 0.30 |
| 2 | 6  | 0.00 | -0.68 | -0.17 | -0.17 | -0.17 | 0.17  | 0.44 |
| 2 | 7  | 0.00 | 0.28  | 0.05  | -0.34 | 0.05  | 0.34  | 0.32 |
| 2 | 8  | 0.00 | -1.89 | -0.65 | 0.26  | -0.65 | -0.26 | 1.23 |
| 2 | 9  | 0.00 | 0.33  | -0.09 | 1.35  | -0.09 | -1.35 | 1.12 |
| 2 | 10 | 0.00 | 0.07  | 0.02  | -0.08 | 0.02  | 0.08  | 0.08 |
| 2 | 11 | 0.00 | 0.04  | 0.03  | -0.03 | 0.03  | 0.03  | 0.04 |
| 2 | 12 | 0.00 | 0.04  | 0.01  | 0.03  | 0.01  | -0.03 | 0.03 |
| 2 | 13 | 0.00 | 0.16  | 0.03  | 0.15  | 0.03  | -0.15 | 0.16 |
| 2 | 14 | 0.00 | 0.03  | 0.01  | 0.02  | 0.01  | -0.02 | 0.03 |
| 2 | 15 | 0.00 | 0.08  | 0.04  | 0.14  | 0.04  | -0.14 | 0.13 |
| 2 | 16 | 0.00 | 0.15  | 0.21  | 0.07  | 0.21  | -0.07 | 0.20 |
| 2 | 17 | 0.00 | 0.03  | -0.01 | 0.09  | -0.01 | -0.09 | 0.08 |
| 2 | 18 | 0.00 | 0.06  | -0.21 | 0.25  | -0.21 | -0.25 | 0.27 |
| 2 | 19 | 0.00 | -2.49 | 0.74  | -8.42 | 0.74  | 8.42  | 7.05 |
| 2 | 20 | 0.00 | 0.21  | -0.14 | 0.87  | -0.14 | -0.87 | 0.73 |
| 2 | 21 | 0.00 | -0.01 | 0.18  | 0.38  | 0.18  | -0.38 | 0.34 |
| 2 | 22 | 0.00 | -1.48 | -0.20 | -3.84 | -0.20 | 3.84  | 3.25 |
| 2 | 23 | 0.00 | 1.18  | 0.20  | 2.76  | 0.20  | -2.76 | 2.36 |
| 2 | 24 | 0.00 | 0.47  | 0.06  | 0.80  | 0.06  | -0.80 | 0.71 |
| 2 | 25 | 0.00 | 4.33  | 1.04  | 6.27  | 1.04  | -6.27 | 5.76 |
| 2 | 26 | 0.00 | 0.07  | 0.01  | -0.05 | 0.01  | 0.05  | 0.06 |
| 2 | 27 | 0.00 | 0.01  | 0.00  | 0.00  | 0.00  | 0.00  | 0.01 |
| 2 | 28 | 0.00 | 0.14  | 0.04  | 0.28  | 0.04  | -0.28 | 0.24 |
| 2 | 29 | 0.00 | -0.56 | -0.18 | -0.97 | -0.18 | 0.97  | 0.87 |
| 2 | 30 | 0.00 | 1.67  | 0.25  | 3.00  | 0.25  | -3.00 | 2.64 |
| 3 | 0  | 0.00 | 0.02  | -0.17 | -0.50 | -0.17 | 0.50  | 0.43 |
| 3 | 1  | 0.00 | -1.30 | 0.85  | -0.15 | 0.85  | 0.15  | 1.03 |

|   |    |      |       |       |       |       |       |      |
|---|----|------|-------|-------|-------|-------|-------|------|
| 3 | 2  | 0.00 | 1.16  | 0.95  | 0.59  | 0.95  | -0.59 | 1.13 |
| 3 | 3  | 0.00 | 0.12  | 0.83  | 0.31  | 0.83  | -0.31 | 0.73 |
| 3 | 4  | 0.00 | 0.38  | -0.71 | -0.09 | -0.71 | 0.09  | 0.62 |
| 3 | 5  | 0.00 | 0.66  | -1.31 | -0.35 | -1.31 | 0.35  | 1.17 |
| 3 | 6  | 0.00 | 1.27  | -0.63 | 0.16  | -0.63 | -0.16 | 0.91 |
| 3 | 7  | 0.00 | -0.13 | 0.84  | 0.35  | 0.84  | -0.35 | 0.75 |
| 3 | 8  | 0.00 | -0.33 | 0.34  | 0.21  | 0.34  | -0.21 | 0.38 |
| 3 | 9  | 0.00 | -0.03 | 0.02  | 0.01  | 0.02  | -0.01 | 0.03 |
| 3 | 10 | 0.00 | 0.10  | 0.01  | 0.07  | 0.01  | -0.07 | 0.08 |
| 3 | 11 | 0.00 | -0.27 | -0.06 | -0.20 | -0.06 | 0.20  | 0.23 |
| 3 | 12 | 0.00 | -0.07 | 0.16  | 0.04  | 0.16  | -0.04 | 0.14 |
| 3 | 13 | 0.00 | -0.06 | -0.02 | -0.04 | -0.02 | 0.04  | 0.05 |
| 3 | 14 | 0.00 | -0.03 | 0.00  | -0.04 | 0.00  | 0.04  | 0.04 |
| 3 | 15 | 0.00 | -0.02 | -0.06 | -0.03 | -0.06 | 0.03  | 0.06 |
| 3 | 16 | 0.00 | 0.07  | 0.09  | 0.05  | 0.09  | -0.05 | 0.09 |
| 3 | 17 | 0.00 | 0.06  | -0.20 | 0.09  | -0.20 | -0.09 | 0.18 |
| 3 | 18 | 0.00 | 0.10  | 0.16  | 0.10  | 0.16  | -0.10 | 0.16 |
| 3 | 19 | 0.00 | -2.24 | -3.95 | -3.15 | -3.95 | 3.15  | 4.32 |
| 3 | 20 | 0.00 | -0.05 | -0.13 | 0.01  | -0.13 | -0.01 | 0.11 |
| 3 | 21 | 0.00 | -0.68 | -0.92 | -0.64 | -0.92 | 0.64  | 1.00 |
| 3 | 22 | 0.00 | 3.42  | 5.97  | 3.75  | 5.97  | -3.75 | 6.09 |
| 3 | 23 | 0.00 | -1.98 | -3.52 | -2.33 | -3.52 | 2.33  | 3.63 |
| 3 | 24 | 0.00 | -0.28 | -0.02 | -0.18 | -0.02 | 0.18  | 0.22 |
| 3 | 25 | 0.00 | -1.49 | 0.94  | 0.06  | 0.94  | -0.06 | 1.15 |
| 3 | 26 | 0.00 | 0.10  | -0.17 | -0.13 | -0.17 | 0.13  | 0.18 |
| 3 | 27 | 0.00 | 0.02  | -0.14 | -0.07 | -0.14 | 0.07  | 0.13 |
| 3 | 28 | 0.00 | 0.48  | -0.25 | 0.05  | -0.25 | -0.05 | 0.35 |
| 3 | 29 | 0.00 | -1.89 | 0.67  | -0.43 | 0.67  | 0.43  | 1.27 |
| 3 | 30 | 0.00 | 3.07  | -2.37 | 0.41  | -2.37 | -0.41 | 2.65 |
| 4 | 0  | 0.00 | -0.38 | 0.95  | 0.88  | 0.95  | -0.88 | 1.08 |
| 4 | 1  | 0.00 | -0.35 | 0.39  | -0.05 | 0.39  | 0.05  | 0.38 |
| 4 | 2  | 0.00 | 1.57  | -2.10 | -0.43 | -2.10 | 0.43  | 1.97 |
| 4 | 3  | 0.00 | -2.27 | -0.24 | 0.75  | -0.24 | -0.75 | 1.46 |
| 4 | 4  | 0.00 | 0.71  | -0.15 | 1.10  | -0.15 | -1.10 | 0.99 |
| 4 | 5  | 0.00 | 1.22  | 0.02  | 0.86  | 0.02  | -0.86 | 0.99 |
| 4 | 6  | 0.00 | 0.00  | 0.10  | 0.01  | 0.10  | -0.01 | 0.08 |
| 4 | 7  | 0.00 | 0.08  | 0.23  | -0.16 | 0.23  | 0.16  | 0.23 |
| 4 | 8  | 0.00 | 0.04  | 0.07  | 0.02  | 0.07  | -0.02 | 0.06 |
| 4 | 9  | 0.00 | -0.02 | 0.00  | 0.02  | 0.00  | -0.02 | 0.02 |
| 4 | 10 | 0.00 | -0.26 | -0.10 | -0.11 | -0.10 | 0.11  | 0.19 |
| 4 | 11 | 0.00 | -0.08 | -0.04 | -0.02 | -0.04 | 0.02  | 0.06 |
| 4 | 12 | 0.00 | 0.17  | 0.13  | 0.07  | 0.13  | -0.07 | 0.16 |
| 4 | 13 | 0.00 | 0.10  | 0.03  | 0.07  | 0.03  | -0.07 | 0.08 |
| 4 | 14 | 0.00 | 0.01  | -0.08 | 0.05  | -0.08 | -0.05 | 0.08 |

|   |    |      |       |       |       |       |       |      |
|---|----|------|-------|-------|-------|-------|-------|------|
| 4 | 15 | 0.00 | -0.07 | -0.11 | -0.05 | -0.11 | 0.05  | 0.11 |
| 4 | 16 | 0.00 | 0.02  | 0.02  | -0.03 | 0.02  | 0.03  | 0.03 |
| 4 | 17 | 0.00 | 0.00  | -0.08 | 0.00  | -0.08 | 0.00  | 0.07 |
| 4 | 18 | 0.00 | 0.04  | 0.06  | -0.14 | 0.06  | 0.14  | 0.13 |
| 4 | 19 | 0.00 | -1.90 | -1.15 | 5.69  | -1.15 | -5.69 | 4.87 |
| 4 | 20 | 0.00 | 0.13  | 0.01  | -0.27 | 0.01  | 0.27  | 0.23 |
| 4 | 21 | 0.00 | -0.07 | -0.69 | 0.31  | -0.69 | -0.31 | 0.62 |
| 4 | 22 | 0.00 | 0.51  | 1.91  | 0.10  | 1.91  | -0.10 | 1.59 |
| 4 | 23 | 0.00 | -0.01 | -1.10 | -0.10 | -1.10 | 0.10  | 0.90 |
| 4 | 24 | 0.00 | 0.23  | -0.57 | 0.34  | -0.57 | -0.34 | 0.56 |
| 4 | 25 | 0.00 | 2.62  | -6.10 | 3.12  | -6.10 | -3.12 | 5.80 |
| 4 | 26 | 0.00 | 0.01  | 0.39  | -0.15 | 0.39  | 0.15  | 0.34 |
| 4 | 27 | 0.00 | 0.00  | 0.09  | -0.04 | 0.09  | 0.04  | 0.08 |
| 4 | 28 | 0.00 | 0.00  | 0.42  | -0.03 | 0.42  | 0.03  | 0.34 |
| 4 | 29 | 0.00 | -0.10 | -1.34 | 0.17  | -1.34 | -0.17 | 1.10 |
| 4 | 30 | 0.00 | 0.25  | 3.91  | -0.50 | 3.91  | 0.50  | 3.22 |
| 5 | 0  | 0.00 | 2.20  | -0.71 | 0.38  | -0.71 | -0.38 | 1.43 |
| 5 | 1  | 0.00 | 0.14  | -2.10 | -0.57 | -2.10 | 0.57  | 1.78 |
| 5 | 2  | 0.00 | 0.68  | 0.07  | 0.22  | 0.07  | -0.22 | 0.44 |
| 5 | 3  | 0.00 | -0.16 | 0.05  | -0.11 | 0.05  | 0.11  | 0.14 |
| 5 | 4  | 0.00 | 0.34  | -0.63 | -0.51 | -0.63 | 0.51  | 0.69 |
| 5 | 5  | 0.00 | 0.10  | -0.96 | 0.03  | -0.96 | -0.03 | 0.79 |
| 5 | 6  | 0.00 | -1.51 | -1.29 | -0.31 | -1.29 | 0.31  | 1.39 |
| 5 | 7  | 0.00 | 0.09  | -0.02 | -1.44 | -0.02 | 1.44  | 1.18 |
| 5 | 8  | 0.00 | 0.70  | 0.42  | -0.13 | 0.42  | 0.13  | 0.54 |
| 5 | 9  | 0.00 | -0.22 | -0.09 | -0.22 | -0.09 | 0.22  | 0.23 |
| 5 | 10 | 0.00 | 0.09  | 0.12  | 0.07  | 0.12  | -0.07 | 0.12 |
| 5 | 11 | 0.00 | 0.13  | 0.06  | 0.09  | 0.06  | -0.09 | 0.12 |
| 5 | 12 | 0.00 | -0.05 | 0.08  | -0.05 | 0.08  | 0.05  | 0.08 |
| 5 | 13 | 0.00 | 0.01  | 0.09  | 0.10  | 0.09  | -0.10 | 0.11 |
| 5 | 14 | 0.00 | 0.01  | 0.09  | -0.03 | 0.09  | 0.03  | 0.08 |
| 5 | 15 | 0.00 | 0.08  | 0.03  | -0.03 | 0.03  | 0.03  | 0.06 |
| 5 | 16 | 0.00 | -0.02 | -0.02 | -0.01 | -0.02 | 0.01  | 0.02 |
| 5 | 17 | 0.00 | 0.02  | -0.32 | 0.08  | -0.32 | -0.08 | 0.27 |
| 5 | 18 | 0.00 | -0.06 | -0.10 | -0.06 | -0.10 | 0.06  | 0.10 |
| 5 | 19 | 0.00 | 3.11  | 6.35  | 1.69  | 6.35  | -1.69 | 5.66 |
| 5 | 20 | 0.00 | -0.12 | 0.02  | -0.05 | 0.02  | 0.05  | 0.08 |
| 5 | 21 | 0.00 | 0.11  | 0.21  | -0.26 | 0.21  | 0.26  | 0.28 |
| 5 | 22 | 0.00 | 0.70  | 1.50  | 2.71  | 1.50  | -2.71 | 2.56 |
| 5 | 23 | 0.00 | 0.09  | -0.47 | -1.38 | -0.47 | 1.38  | 1.19 |
| 5 | 24 | 0.00 | 0.30  | 0.56  | 0.04  | 0.56  | -0.04 | 0.49 |
| 5 | 25 | 0.00 | 3.14  | 5.25  | 1.89  | 5.25  | -1.89 | 4.90 |
| 5 | 26 | 0.00 | -0.01 | -0.14 | 0.12  | -0.14 | -0.12 | 0.15 |
| 5 | 27 | 0.00 | -0.03 | 0.00  | 0.05  | 0.00  | -0.05 | 0.04 |

|   |    |      |       |       |       |       |       |      |
|---|----|------|-------|-------|-------|-------|-------|------|
| 5 | 28 | 0.00 | 0.32  | -0.25 | 0.26  | -0.25 | -0.26 | 0.35 |
| 5 | 29 | 0.00 | -1.14 | 0.74  | -0.89 | 0.74  | 0.89  | 1.15 |
| 5 | 30 | 0.00 | 2.35  | 0.62  | 2.76  | 0.62  | -2.76 | 2.68 |
| 6 | 0  | 0.00 | 0.30  | -2.22 | -0.10 | -2.22 | 0.10  | 1.82 |
| 6 | 1  | 0.00 | -1.99 | 0.00  | -0.71 | 0.00  | 0.71  | 1.29 |
| 6 | 2  | 0.00 | -1.07 | -0.30 | -0.53 | -0.30 | 0.53  | 0.79 |
| 6 | 3  | 0.00 | 0.42  | -1.83 | 0.28  | -1.83 | -0.28 | 1.53 |
| 6 | 4  | 0.00 | -0.41 | 0.47  | 0.21  | 0.47  | -0.21 | 0.48 |
| 6 | 5  | 0.00 | -0.08 | -0.52 | 0.27  | -0.52 | -0.27 | 0.48 |
| 6 | 6  | 0.00 | 1.45  | -1.46 | -0.43 | -1.46 | 0.43  | 1.50 |
| 6 | 7  | 0.00 | 0.55  | -1.37 | 0.30  | -1.37 | -0.30 | 1.19 |
| 6 | 8  | 0.00 | 0.12  | 0.10  | -0.54 | 0.10  | 0.54  | 0.45 |
| 6 | 9  | 0.00 | -0.24 | -0.17 | 0.56  | -0.17 | -0.56 | 0.50 |
| 6 | 10 | 0.00 | 0.10  | 0.09  | 0.12  | 0.09  | -0.12 | 0.14 |
| 6 | 11 | 0.00 | 0.08  | -0.01 | 0.01  | -0.01 | -0.01 | 0.05 |
| 6 | 12 | 0.00 | 0.02  | 0.13  | 0.00  | 0.13  | 0.00  | 0.11 |
| 6 | 13 | 0.00 | 0.03  | 0.04  | -0.10 | 0.04  | 0.10  | 0.09 |
| 6 | 14 | 0.00 | -0.14 | 0.31  | -0.14 | 0.31  | 0.14  | 0.29 |
| 6 | 15 | 0.00 | 0.01  | -0.10 | -0.05 | -0.10 | 0.05  | 0.09 |
| 6 | 16 | 0.00 | -0.01 | -0.02 | 0.04  | -0.02 | -0.04 | 0.04 |
| 6 | 17 | 0.00 | 0.02  | 0.03  | -0.04 | 0.03  | 0.04  | 0.04 |
| 6 | 18 | 0.00 | 0.02  | -0.04 | 0.04  | -0.04 | -0.04 | 0.05 |
| 6 | 19 | 0.00 | -0.70 | -1.04 | -0.60 | -1.04 | 0.60  | 1.06 |
| 6 | 20 | 0.00 | 0.12  | 0.07  | -0.10 | 0.07  | 0.10  | 0.12 |
| 6 | 21 | 0.00 | 0.32  | 0.24  | -0.50 | 0.24  | 0.50  | 0.49 |
| 6 | 22 | 0.00 | -2.45 | -3.62 | 3.85  | -3.62 | -3.85 | 4.54 |
| 6 | 23 | 0.00 | 1.38  | 1.82  | -2.64 | 1.82  | 2.64  | 2.74 |
| 6 | 24 | 0.00 | 0.11  | 0.00  | -0.26 | 0.00  | 0.26  | 0.22 |
| 6 | 25 | 0.00 | -1.14 | -1.76 | 0.58  | -1.76 | -0.58 | 1.65 |
| 6 | 26 | 0.00 | -0.03 | -0.34 | 0.19  | -0.34 | -0.19 | 0.32 |
| 6 | 27 | 0.00 | 0.00  | -0.07 | 0.02  | -0.07 | -0.02 | 0.06 |
| 6 | 28 | 0.00 | 0.06  | -1.11 | 0.38  | -1.11 | -0.38 | 0.96 |
| 6 | 29 | 0.00 | -0.30 | 3.88  | -1.25 | 3.88  | 1.25  | 3.33 |
| 6 | 30 | 0.00 | 0.86  | -8.17 | 1.87  | -8.17 | -1.87 | 6.86 |
| 7 | 0  | 0.00 | -2.16 | -0.44 | 0.76  | -0.44 | -0.76 | 1.44 |
| 7 | 1  | 0.00 | 0.36  | -0.05 | -0.25 | -0.05 | 0.25  | 0.29 |
| 7 | 2  | 0.00 | -0.28 | -0.10 | -0.03 | -0.10 | 0.03  | 0.18 |
| 7 | 3  | 0.00 | 1.29  | -0.10 | -0.38 | -0.10 | 0.38  | 0.81 |
| 7 | 4  | 0.00 | 1.49  | 0.39  | 0.34  | 0.39  | -0.34 | 0.96 |
| 7 | 5  | 0.00 | -1.03 | -0.23 | 0.22  | -0.23 | -0.22 | 0.65 |
| 7 | 6  | 0.00 | 0.03  | 0.10  | 0.58  | 0.10  | -0.58 | 0.48 |
| 7 | 7  | 0.00 | 0.11  | -0.34 | 0.02  | -0.34 | -0.02 | 0.29 |
| 7 | 8  | 0.00 | -0.91 | 0.04  | -0.24 | 0.04  | 0.24  | 0.56 |
| 7 | 9  | 0.00 | 0.06  | 1.39  | 0.03  | 1.39  | -0.03 | 1.14 |

|   |    |      |       |       |       |       |       |      |
|---|----|------|-------|-------|-------|-------|-------|------|
| 7 | 10 | 0.00 | -0.09 | -0.05 | 0.10  | -0.05 | -0.10 | 0.11 |
| 7 | 11 | 0.00 | 0.01  | 0.04  | 0.07  | 0.04  | -0.07 | 0.07 |
| 7 | 12 | 0.00 | -0.04 | 0.02  | 0.08  | 0.02  | -0.08 | 0.07 |
| 7 | 13 | 0.00 | 0.11  | 0.07  | -0.05 | 0.07  | 0.05  | 0.09 |
| 7 | 14 | 0.00 | 0.07  | -0.07 | -0.15 | -0.07 | 0.15  | 0.14 |
| 7 | 15 | 0.00 | 0.00  | 0.08  | 0.06  | 0.08  | -0.06 | 0.08 |
| 7 | 16 | 0.00 | 0.04  | 0.01  | 0.10  | 0.01  | -0.10 | 0.09 |
| 7 | 17 | 0.00 | 0.01  | 0.05  | 0.02  | 0.05  | -0.02 | 0.04 |
| 7 | 18 | 0.00 | 0.00  | 0.28  | 0.01  | 0.28  | -0.01 | 0.23 |
| 7 | 19 | 0.00 | -0.47 | 0.31  | -2.26 | 0.31  | 2.26  | 1.88 |
| 7 | 20 | 0.00 | 0.00  | -0.02 | 0.05  | -0.02 | -0.05 | 0.04 |
| 7 | 21 | 0.00 | -0.11 | 0.05  | -0.60 | 0.05  | 0.60  | 0.50 |
| 7 | 22 | 0.00 | 0.85  | -0.95 | 4.92  | -0.95 | -4.92 | 4.12 |
| 7 | 23 | 0.00 | -0.89 | -0.76 | -0.88 | -0.76 | 0.88  | 1.08 |
| 7 | 24 | 0.00 | 0.09  | 0.15  | -0.22 | 0.15  | 0.22  | 0.22 |
| 7 | 25 | 0.00 | 1.13  | 0.22  | 2.91  | 0.22  | -2.91 | 2.47 |
| 7 | 26 | 0.00 | 0.15  | -0.06 | 0.64  | -0.06 | -0.64 | 0.53 |
| 7 | 27 | 0.00 | 0.06  | -0.03 | 0.47  | -0.03 | -0.47 | 0.39 |
| 7 | 28 | 0.00 | -0.84 | 0.04  | -1.47 | 0.04  | 1.47  | 1.29 |
| 7 | 29 | 0.00 | 2.81  | -0.25 | 5.14  | -0.25 | -5.14 | 4.50 |
| 7 | 30 | 0.00 | -1.60 | -0.55 | -2.57 | -0.55 | 2.57  | 2.34 |
| 8 | 0  | 0.00 | -0.96 | 2.25  | 0.48  | 2.25  | -0.48 | 1.96 |
| 8 | 1  | 0.00 | 0.39  | 0.00  | -0.48 | 0.00  | 0.48  | 0.45 |
| 8 | 2  | 0.00 | -0.94 | 0.15  | 1.29  | 0.15  | -1.29 | 1.19 |
| 8 | 3  | 0.00 | 0.67  | -2.02 | -0.07 | -2.02 | 0.07  | 1.70 |
| 8 | 4  | 0.00 | -0.18 | 0.05  | -0.22 | 0.05  | 0.22  | 0.21 |
| 8 | 5  | 0.00 | 0.89  | -1.46 | -0.14 | -1.46 | 0.14  | 1.30 |
| 8 | 6  | 0.00 | -0.08 | -0.90 | 0.20  | -0.90 | -0.20 | 0.75 |
| 8 | 7  | 0.00 | 0.25  | -0.84 | 0.04  | -0.84 | -0.04 | 0.70 |
| 8 | 8  | 0.00 | 0.10  | -0.32 | -0.29 | -0.32 | 0.29  | 0.36 |
| 8 | 9  | 0.00 | -0.26 | -0.41 | -0.48 | -0.41 | 0.48  | 0.54 |
| 8 | 10 | 0.00 | 0.03  | -0.10 | 0.07  | -0.10 | -0.07 | 0.10 |
| 8 | 11 | 0.00 | 0.10  | 0.07  | -0.22 | 0.07  | 0.22  | 0.20 |
| 8 | 12 | 0.00 | -0.02 | 0.12  | 0.07  | 0.12  | -0.07 | 0.11 |
| 8 | 13 | 0.00 | -0.03 | 0.06  | 0.04  | 0.06  | -0.04 | 0.06 |
| 8 | 14 | 0.00 | 0.11  | -0.24 | -0.05 | -0.24 | 0.05  | 0.21 |
| 8 | 15 | 0.00 | 0.05  | 0.09  | 0.10  | 0.09  | -0.10 | 0.11 |
| 8 | 16 | 0.00 | 0.00  | 0.05  | 0.00  | 0.05  | 0.00  | 0.04 |
| 8 | 17 | 0.00 | -0.02 | 0.03  | 0.08  | 0.03  | -0.08 | 0.07 |
| 8 | 18 | 0.00 | 0.01  | -0.04 | 0.00  | -0.04 | 0.00  | 0.03 |
| 8 | 19 | 0.00 | 0.14  | 0.17  | 0.58  | 0.17  | -0.58 | 0.50 |
| 8 | 20 | 0.00 | -0.01 | 0.04  | 0.01  | 0.04  | -0.01 | 0.03 |
| 8 | 21 | 0.00 | 0.06  | -0.11 | 0.10  | -0.11 | -0.10 | 0.13 |
| 8 | 22 | 0.00 | -2.31 | -2.59 | -2.46 | -2.59 | 2.46  | 3.21 |

|    |    |      |       |       |       |       |       |      |
|----|----|------|-------|-------|-------|-------|-------|------|
| 8  | 23 | 0.00 | -3.74 | -4.63 | -2.22 | -4.63 | 2.22  | 4.72 |
| 8  | 24 | 0.00 | -0.01 | -0.04 | 0.07  | -0.04 | -0.07 | 0.07 |
| 8  | 25 | 0.00 | 0.06  | 0.61  | -0.34 | 0.61  | 0.34  | 0.57 |
| 8  | 26 | 0.00 | 0.12  | 0.01  | 0.02  | 0.01  | -0.02 | 0.07 |
| 8  | 27 | 0.00 | 0.05  | -0.43 | -0.14 | -0.43 | 0.14  | 0.37 |
| 8  | 28 | 0.00 | -0.40 | 1.45  | 0.17  | 1.45  | -0.17 | 1.21 |
| 8  | 29 | 0.00 | 1.22  | -4.53 | -1.44 | -4.53 | 1.44  | 3.94 |
| 8  | 30 | 0.00 | 1.56  | -1.93 | 0.47  | -1.93 | -0.47 | 1.86 |
| 9  | 0  | 0.00 | -0.91 | -0.85 | 2.22  | -0.85 | -2.22 | 2.01 |
| 9  | 1  | 0.00 | -0.19 | 0.02  | 0.19  | 0.02  | -0.19 | 0.19 |
| 9  | 2  | 0.00 | 0.07  | 0.02  | 0.09  | 0.02  | -0.09 | 0.09 |
| 9  | 3  | 0.00 | 0.18  | 0.33  | -0.72 | 0.33  | 0.72  | 0.65 |
| 9  | 4  | 0.00 | 0.37  | -0.24 | -1.39 | -0.24 | 1.39  | 1.17 |
| 9  | 5  | 0.00 | 0.25  | 0.37  | 0.16  | 0.37  | -0.16 | 0.36 |
| 9  | 6  | 0.00 | 0.14  | -0.25 | 0.09  | -0.25 | -0.09 | 0.23 |
| 9  | 7  | 0.00 | -0.27 | -0.03 | -0.54 | -0.03 | 0.54  | 0.47 |
| 9  | 8  | 0.00 | 0.49  | -1.26 | 0.27  | -1.26 | -0.27 | 1.09 |
| 9  | 9  | 0.00 | -0.13 | 0.37  | -0.51 | 0.37  | 0.51  | 0.52 |
| 9  | 10 | 0.00 | -0.02 | 0.01  | 0.00  | 0.01  | 0.00  | 0.01 |
| 9  | 11 | 0.00 | 0.00  | -0.06 | -0.03 | -0.06 | 0.03  | 0.05 |
| 9  | 12 | 0.00 | -0.01 | -0.05 | -0.04 | -0.05 | 0.04  | 0.05 |
| 9  | 13 | 0.00 | 0.02  | 0.02  | -0.30 | 0.02  | 0.30  | 0.25 |
| 9  | 14 | 0.00 | -0.01 | -0.01 | -0.04 | -0.01 | 0.04  | 0.03 |
| 9  | 15 | 0.00 | -0.02 | -0.03 | -0.08 | -0.03 | 0.08  | 0.07 |
| 9  | 16 | 0.00 | -0.04 | 0.28  | 0.09  | 0.28  | -0.09 | 0.24 |
| 9  | 17 | 0.00 | 0.04  | -0.09 | -0.03 | -0.09 | 0.03  | 0.08 |
| 9  | 18 | 0.00 | -0.02 | -0.05 | -0.01 | -0.05 | 0.01  | 0.04 |
| 9  | 19 | 0.00 | 0.13  | -0.15 | 0.89  | -0.15 | -0.89 | 0.74 |
| 9  | 20 | 0.00 | 0.04  | 0.01  | -0.13 | 0.01  | 0.13  | 0.11 |
| 9  | 21 | 0.00 | 0.05  | -0.01 | 0.24  | -0.01 | -0.24 | 0.20 |
| 9  | 22 | 0.00 | 0.34  | 0.06  | 1.46  | 0.06  | -1.46 | 1.21 |
| 9  | 23 | 0.00 | 1.42  | -0.23 | 5.86  | -0.23 | -5.86 | 4.86 |
| 9  | 24 | 0.00 | -0.04 | -0.03 | 0.09  | -0.03 | -0.09 | 0.08 |
| 9  | 25 | 0.00 | -0.52 | -0.07 | -1.57 | -0.07 | 1.57  | 1.32 |
| 9  | 26 | 0.00 | 0.10  | 0.05  | 0.18  | 0.05  | -0.18 | 0.16 |
| 9  | 27 | 0.00 | 0.06  | 0.18  | 0.76  | 0.18  | -0.76 | 0.64 |
| 9  | 28 | 0.00 | -0.81 | -0.40 | -2.36 | -0.40 | 2.36  | 2.01 |
| 9  | 29 | 0.00 | 2.11  | 1.10  | 5.80  | 1.10  | -5.80 | 4.97 |
| 9  | 30 | 0.00 | 2.37  | 0.87  | 5.33  | 0.87  | -5.33 | 4.62 |
| 10 | 0  | 0.00 | 0.07  | -0.27 | 0.11  | -0.27 | -0.11 | 0.24 |
| 10 | 1  | 0.00 | -0.17 | 0.05  | -0.09 | 0.05  | 0.09  | 0.13 |
| 10 | 2  | 0.00 | -0.07 | 0.04  | -0.06 | 0.04  | 0.06  | 0.07 |
| 10 | 3  | 0.00 | 0.02  | -0.20 | 0.04  | -0.20 | -0.04 | 0.17 |
| 10 | 4  | 0.00 | 0.00  | 0.17  | -0.09 | 0.17  | 0.09  | 0.16 |

|    |    |      |       |       |       |       |       |      |
|----|----|------|-------|-------|-------|-------|-------|------|
| 10 | 5  | 0.00 | -0.05 | 0.21  | -0.02 | 0.21  | 0.02  | 0.17 |
| 10 | 6  | 0.00 | 0.01  | 0.03  | -0.02 | 0.03  | 0.02  | 0.03 |
| 10 | 7  | 0.00 | 0.10  | -0.12 | -0.06 | -0.12 | 0.06  | 0.12 |
| 10 | 8  | 0.00 | 0.02  | -0.08 | 0.06  | -0.08 | -0.06 | 0.08 |
| 10 | 9  | 0.00 | -0.06 | 0.01  | 0.10  | 0.01  | -0.10 | 0.09 |
| 10 | 10 | 0.00 | 0.18  | -0.20 | 0.02  | -0.20 | -0.02 | 0.19 |
| 10 | 11 | 0.00 | -0.31 | 0.57  | 0.09  | 0.57  | -0.09 | 0.50 |
| 10 | 12 | 0.00 | 0.17  | -0.21 | -0.06 | -0.21 | 0.06  | 0.20 |
| 10 | 13 | 0.00 | -0.11 | -0.05 | 0.18  | -0.05 | -0.18 | 0.17 |
| 10 | 14 | 0.00 | 0.00  | -0.19 | 0.00  | -0.19 | 0.00  | 0.16 |
| 10 | 15 | 0.00 | 0.15  | -0.39 | -0.04 | -0.39 | 0.04  | 0.33 |
| 10 | 16 | 0.00 | 0.15  | -0.08 | -0.14 | -0.08 | 0.14  | 0.16 |
| 10 | 17 | 0.00 | -1.11 | 1.90  | 0.23  | 1.90  | -0.23 | 1.69 |
| 10 | 18 | 0.00 | -0.29 | -0.32 | 0.59  | -0.32 | -0.59 | 0.57 |
| 10 | 19 | 0.00 | 0.03  | 0.04  | -0.04 | 0.04  | 0.04  | 0.05 |
| 10 | 20 | 0.00 | 0.12  | 0.00  | -0.12 | 0.00  | 0.12  | 0.12 |
| 10 | 21 | 0.00 | 0.02  | 0.00  | -0.02 | 0.00  | 0.02  | 0.02 |
| 10 | 22 | 0.00 | 0.06  | 0.02  | 0.14  | 0.02  | -0.14 | 0.12 |
| 10 | 23 | 0.00 | 0.29  | 0.31  | -0.12 | 0.31  | 0.12  | 0.32 |
| 10 | 24 | 0.00 | -0.06 | 0.19  | -0.03 | 0.19  | 0.03  | 0.16 |
| 10 | 25 | 0.00 | -0.07 | 0.04  | 0.02  | 0.04  | -0.02 | 0.05 |
| 10 | 26 | 0.00 | 0.01  | -0.06 | 0.03  | -0.06 | -0.03 | 0.06 |
| 10 | 27 | 0.00 | 0.03  | -0.02 | 0.02  | -0.02 | -0.02 | 0.03 |
| 10 | 28 | 0.00 | -0.05 | -0.05 | -0.10 | -0.05 | 0.10  | 0.10 |
| 10 | 29 | 0.00 | 0.16  | 0.13  | 0.19  | 0.13  | -0.19 | 0.21 |
| 10 | 30 | 0.00 | 0.17  | -0.41 | 0.27  | -0.41 | -0.27 | 0.41 |
| 11 | 0  | 0.00 | 0.40  | 0.20  | 0.05  | 0.20  | -0.05 | 0.29 |
| 11 | 1  | 0.00 | -0.04 | 0.02  | 0.04  | 0.02  | -0.04 | 0.04 |
| 11 | 2  | 0.00 | 0.06  | 0.00  | 0.03  | 0.00  | -0.03 | 0.04 |
| 11 | 3  | 0.00 | -0.26 | -0.04 | 0.02  | -0.04 | -0.02 | 0.15 |
| 11 | 4  | 0.00 | -0.43 | -0.08 | -0.19 | -0.08 | 0.19  | 0.30 |
| 11 | 5  | 0.00 | 0.29  | 0.00  | 0.03  | 0.00  | -0.03 | 0.17 |
| 11 | 6  | 0.00 | -0.08 | -0.05 | -0.12 | -0.05 | 0.12  | 0.12 |
| 11 | 7  | 0.00 | 0.01  | 0.04  | -0.04 | 0.04  | 0.04  | 0.05 |
| 11 | 8  | 0.00 | 0.03  | -0.02 | 0.06  | -0.02 | -0.06 | 0.05 |
| 11 | 9  | 0.00 | 0.00  | -0.28 | 0.23  | -0.28 | -0.23 | 0.30 |
| 11 | 10 | 0.00 | -0.62 | -0.06 | 0.66  | -0.06 | -0.66 | 0.65 |
| 11 | 11 | 0.00 | -0.06 | 0.06  | 0.56  | 0.06  | -0.56 | 0.46 |
| 11 | 12 | 0.00 | -0.01 | -0.03 | -0.07 | -0.03 | 0.07  | 0.06 |
| 11 | 13 | 0.00 | -0.01 | -0.03 | -0.03 | -0.03 | 0.03  | 0.04 |
| 11 | 14 | 0.00 | 0.20  | 0.02  | -0.24 | 0.02  | 0.24  | 0.23 |
| 11 | 15 | 0.00 | 0.06  | -0.01 | -0.20 | -0.01 | 0.20  | 0.17 |
| 11 | 16 | 0.00 | -0.07 | 0.01  | 0.00  | 0.01  | 0.00  | 0.04 |
| 11 | 17 | 0.00 | -0.03 | 0.05  | -0.06 | 0.05  | 0.06  | 0.07 |

|    |    |      |       |       |       |       |       |      |
|----|----|------|-------|-------|-------|-------|-------|------|
| 11 | 18 | 0.00 | 0.05  | -0.01 | 0.07  | -0.01 | -0.07 | 0.06 |
| 11 | 19 | 0.00 | -0.08 | -0.09 | 0.15  | -0.09 | -0.15 | 0.15 |
| 11 | 20 | 0.00 | 0.01  | -0.01 | 0.00  | -0.01 | 0.00  | 0.01 |
| 11 | 21 | 0.00 | 0.02  | 0.00  | 0.11  | 0.00  | -0.11 | 0.09 |
| 11 | 22 | 0.00 | -0.24 | 0.08  | -0.99 | 0.08  | 0.99  | 0.82 |
| 11 | 23 | 0.00 | 0.09  | 0.00  | 0.11  | 0.00  | -0.11 | 0.10 |
| 11 | 24 | 0.00 | 0.04  | -0.01 | 0.05  | -0.01 | -0.05 | 0.05 |
| 11 | 25 | 0.00 | -0.16 | 0.01  | -0.50 | 0.01  | 0.50  | 0.42 |
| 11 | 26 | 0.00 | 0.22  | 0.08  | -0.09 | 0.08  | 0.09  | 0.16 |
| 11 | 27 | 0.00 | 0.05  | 0.00  | -0.04 | 0.00  | 0.04  | 0.04 |
| 11 | 28 | 0.00 | 0.07  | -0.01 | 0.44  | -0.01 | -0.44 | 0.36 |
| 11 | 29 | 0.00 | -0.45 | -0.11 | -0.86 | -0.11 | 0.86  | 0.75 |
| 11 | 30 | 0.00 | 0.27  | 0.05  | 0.41  | 0.05  | -0.41 | 0.37 |
| 12 | 0  | 0.00 | 0.03  | 0.22  | 0.14  | 0.22  | -0.14 | 0.21 |
| 12 | 1  | 0.00 | -0.07 | -0.10 | -0.07 | -0.10 | 0.07  | 0.11 |
| 12 | 2  | 0.00 | 0.12  | 0.16  | 0.16  | 0.16  | -0.16 | 0.20 |
| 12 | 3  | 0.00 | -0.01 | -0.10 | 0.03  | -0.10 | -0.03 | 0.09 |
| 12 | 4  | 0.00 | 0.04  | -0.05 | 0.01  | -0.05 | -0.01 | 0.05 |
| 12 | 5  | 0.00 | 0.10  | -0.20 | -0.03 | -0.20 | 0.03  | 0.17 |
| 12 | 6  | 0.00 | -0.09 | -0.10 | 0.01  | -0.10 | -0.01 | 0.10 |
| 12 | 7  | 0.00 | 0.04  | 0.17  | 0.00  | 0.17  | 0.00  | 0.14 |
| 12 | 8  | 0.00 | 0.01  | 0.04  | 0.01  | 0.04  | -0.01 | 0.03 |
| 12 | 9  | 0.00 | -0.01 | 0.01  | -0.06 | 0.01  | 0.06  | 0.05 |
| 12 | 10 | 0.00 | -0.26 | 0.48  | 0.08  | 0.48  | -0.08 | 0.42 |
| 12 | 11 | 0.00 | -0.03 | 0.08  | -0.02 | 0.08  | 0.02  | 0.07 |
| 12 | 12 | 0.00 | 0.84  | -1.58 | -0.26 | -1.58 | 0.26  | 1.39 |
| 12 | 13 | 0.00 | 0.15  | -0.41 | -0.11 | -0.41 | 0.11  | 0.36 |
| 12 | 14 | 0.00 | -0.14 | 0.29  | 0.04  | 0.29  | -0.04 | 0.25 |
| 12 | 15 | 0.00 | -0.61 | 1.13  | 0.21  | 1.13  | -0.21 | 1.00 |
| 12 | 16 | 0.00 | -0.20 | -0.20 | -0.25 | -0.20 | 0.25  | 0.29 |
| 12 | 17 | 0.00 | -0.07 | -0.03 | 0.01  | -0.03 | -0.01 | 0.05 |
| 12 | 18 | 0.00 | -0.01 | -0.03 | -0.05 | -0.03 | 0.05  | 0.05 |
| 12 | 19 | 0.00 | -0.03 | 0.14  | 0.04  | 0.14  | -0.04 | 0.12 |
| 12 | 20 | 0.00 | -0.02 | 0.00  | 0.00  | 0.00  | 0.00  | 0.01 |
| 12 | 21 | 0.00 | -0.25 | -0.11 | -0.10 | -0.11 | 0.10  | 0.19 |
| 12 | 22 | 0.00 | 0.04  | -0.01 | 0.00  | -0.01 | 0.00  | 0.02 |
| 12 | 23 | 0.00 | -0.35 | -0.36 | -0.28 | -0.36 | 0.28  | 0.42 |
| 12 | 24 | 0.00 | -0.01 | 0.01  | 0.00  | 0.01  | 0.00  | 0.01 |
| 12 | 25 | 0.00 | 0.13  | 0.21  | 0.11  | 0.21  | -0.11 | 0.21 |
| 12 | 26 | 0.00 | -0.03 | 0.06  | 0.02  | 0.06  | -0.02 | 0.05 |
| 12 | 27 | 0.00 | 0.10  | -0.20 | -0.05 | -0.20 | 0.05  | 0.18 |
| 12 | 28 | 0.00 | -0.03 | 0.14  | 0.03  | 0.14  | -0.03 | 0.12 |
| 12 | 29 | 0.00 | 0.04  | -0.31 | -0.11 | -0.31 | 0.11  | 0.27 |
| 12 | 30 | 0.00 | 0.14  | 0.00  | 0.03  | 0.00  | -0.03 | 0.08 |



|    |    |      |       |       |       |       |       |      |
|----|----|------|-------|-------|-------|-------|-------|------|
| 13 | 0  | 0.00 | 0.01  | -0.12 | 0.08  | -0.12 | -0.08 | 0.12 |
| 13 | 1  | 0.00 | 0.02  | -0.10 | 0.00  | -0.10 | 0.00  | 0.08 |
| 13 | 2  | 0.00 | 0.03  | -0.04 | -0.04 | -0.04 | 0.04  | 0.05 |
| 13 | 3  | 0.00 | 0.13  | 0.02  | 0.01  | 0.02  | -0.01 | 0.08 |
| 13 | 4  | 0.00 | -0.04 | 0.10  | -0.02 | 0.10  | 0.02  | 0.09 |
| 13 | 5  | 0.00 | -0.06 | 0.22  | 0.08  | 0.22  | -0.08 | 0.19 |
| 13 | 6  | 0.00 | -0.02 | 0.13  | 0.00  | 0.13  | 0.00  | 0.11 |
| 13 | 7  | 0.00 | -0.03 | -0.21 | -0.04 | -0.21 | 0.04  | 0.18 |
| 13 | 8  | 0.00 | -0.01 | -0.20 | -0.02 | -0.20 | 0.02  | 0.16 |
| 13 | 9  | 0.00 | -0.05 | -0.09 | -0.04 | -0.09 | 0.04  | 0.09 |
| 13 | 10 | 0.00 | 0.06  | -0.04 | -0.01 | -0.04 | 0.01  | 0.05 |
| 13 | 11 | 0.00 | -0.04 | 0.10  | 0.01  | 0.10  | -0.01 | 0.09 |
| 13 | 12 | 0.00 | -0.01 | -0.01 | 0.00  | -0.01 | 0.00  | 0.01 |
| 13 | 13 | 0.00 | 0.01  | 0.02  | -0.04 | 0.02  | 0.04  | 0.04 |
| 13 | 14 | 0.00 | -0.01 | 0.00  | 0.00  | 0.00  | 0.00  | 0.01 |
| 13 | 15 | 0.00 | 0.03  | -0.10 | -0.01 | -0.10 | 0.01  | 0.08 |
| 13 | 16 | 0.00 | 0.01  | -0.01 | 0.00  | -0.01 | 0.00  | 0.01 |
| 13 | 17 | 0.00 | -0.05 | 0.15  | 0.03  | 0.15  | -0.03 | 0.13 |
| 13 | 18 | 0.00 | -0.02 | -0.01 | -0.01 | -0.01 | 0.01  | 0.02 |
| 13 | 19 | 0.00 | 0.01  | -0.01 | 0.05  | -0.01 | -0.05 | 0.04 |
| 13 | 20 | 0.00 | -1.04 | -0.14 | 1.11  | -0.14 | -1.11 | 1.09 |
| 13 | 21 | 0.00 | 0.06  | 0.02  | -0.05 | 0.02  | 0.05  | 0.06 |
| 13 | 22 | 0.00 | 0.64  | 0.16  | -0.42 | 0.16  | 0.42  | 0.52 |
| 13 | 23 | 0.00 | 0.93  | 0.50  | -0.82 | 0.50  | 0.82  | 0.95 |
| 13 | 24 | 0.00 | 0.33  | -1.16 | 0.30  | -1.16 | -0.30 | 1.00 |
| 13 | 25 | 0.00 | -0.13 | 0.12  | -0.08 | 0.12  | 0.08  | 0.14 |
| 13 | 26 | 0.00 | 0.05  | 0.20  | 0.00  | 0.20  | 0.00  | 0.17 |
| 13 | 27 | 0.00 | 0.03  | -0.02 | 0.06  | -0.02 | -0.06 | 0.05 |
| 13 | 28 | 0.00 | -0.27 | 0.26  | -0.08 | 0.26  | 0.08  | 0.27 |
| 13 | 29 | 0.00 | 0.62  | -0.80 | 0.47  | -0.80 | -0.47 | 0.84 |
| 13 | 30 | 0.00 | 0.29  | -0.47 | 0.25  | -0.47 | -0.25 | 0.47 |
| 14 | 0  | 0.00 | 0.09  | -0.09 | 0.03  | -0.09 | -0.03 | 0.09 |
| 14 | 1  | 0.00 | 0.00  | -0.16 | -0.14 | -0.16 | 0.14  | 0.17 |
| 14 | 2  | 0.00 | 0.00  | -0.01 | 0.08  | -0.01 | -0.08 | 0.07 |
| 14 | 3  | 0.00 | -0.03 | -0.08 | 0.05  | -0.08 | -0.05 | 0.08 |
| 14 | 4  | 0.00 | -0.04 | 0.05  | -0.03 | 0.05  | 0.03  | 0.05 |
| 14 | 5  | 0.00 | -0.01 | 0.12  | 0.00  | 0.12  | 0.00  | 0.10 |
| 14 | 6  | 0.00 | -0.08 | 0.05  | 0.12  | 0.05  | -0.12 | 0.12 |
| 14 | 7  | 0.00 | 0.11  | -0.10 | -0.05 | -0.10 | 0.05  | 0.11 |
| 14 | 8  | 0.00 | -0.11 | 0.01  | 0.14  | 0.01  | -0.14 | 0.13 |
| 14 | 9  | 0.00 | -0.04 | -0.07 | 0.06  | -0.07 | -0.06 | 0.08 |
| 14 | 10 | 0.00 | -0.07 | 0.02  | 0.05  | 0.02  | -0.05 | 0.06 |
| 14 | 11 | 0.00 | 0.02  | 0.04  | 0.08  | 0.04  | -0.08 | 0.07 |
| 14 | 12 | 0.00 | -0.05 | 0.12  | -0.01 | 0.12  | 0.01  | 0.10 |

|    |    |      |       |       |       |       |       |      |
|----|----|------|-------|-------|-------|-------|-------|------|
| 14 | 13 | 0.00 | 0.02  | 0.04  | 0.00  | 0.04  | 0.00  | 0.03 |
| 14 | 14 | 0.00 | 0.08  | -0.01 | -0.06 | -0.01 | 0.06  | 0.07 |
| 14 | 15 | 0.00 | 0.06  | -0.11 | -0.05 | -0.11 | 0.05  | 0.10 |
| 14 | 16 | 0.00 | 0.03  | 0.05  | 0.03  | 0.05  | -0.03 | 0.05 |
| 14 | 17 | 0.00 | -0.02 | 0.02  | 0.00  | 0.02  | 0.00  | 0.02 |
| 14 | 18 | 0.00 | -0.03 | -0.01 | 0.03  | -0.01 | -0.03 | 0.03 |
| 14 | 19 | 0.00 | -0.04 | 0.25  | -0.33 | 0.25  | 0.33  | 0.34 |
| 14 | 20 | 0.00 | 0.02  | 0.02  | 0.12  | 0.02  | -0.12 | 0.10 |
| 14 | 21 | 0.00 | -1.11 | -0.24 | -0.34 | -0.24 | 0.34  | 0.73 |
| 14 | 22 | 0.00 | -0.95 | -0.18 | -0.41 | -0.18 | 0.41  | 0.66 |
| 14 | 23 | 0.00 | 0.71  | 0.19  | 0.30  | 0.19  | -0.30 | 0.50 |
| 14 | 24 | 0.00 | -0.22 | -0.14 | -0.01 | -0.14 | 0.01  | 0.17 |
| 14 | 25 | 0.00 | 1.28  | 0.10  | 0.74  | 0.10  | -0.74 | 0.96 |
| 14 | 26 | 0.00 | -1.63 | -0.23 | -0.13 | -0.23 | 0.13  | 0.97 |
| 14 | 27 | 0.00 | -0.04 | -0.67 | -0.44 | -0.67 | 0.44  | 0.65 |
| 14 | 28 | 0.00 | 0.05  | 0.37  | -0.88 | 0.37  | 0.88  | 0.78 |
| 14 | 29 | 0.00 | 0.29  | 0.01  | -0.26 | 0.01  | 0.26  | 0.27 |
| 14 | 30 | 0.00 | 0.01  | 0.37  | 0.43  | 0.37  | -0.43 | 0.46 |
| 15 | 0  | 0.00 | 0.12  | -0.16 | -0.07 | -0.16 | 0.07  | 0.16 |
| 15 | 1  | 0.00 | 0.00  | -0.08 | 0.11  | -0.08 | -0.11 | 0.11 |
| 15 | 2  | 0.00 | 0.01  | -0.05 | -0.13 | -0.05 | 0.13  | 0.11 |
| 15 | 3  | 0.00 | 0.01  | -0.05 | 0.03  | -0.05 | -0.03 | 0.05 |
| 15 | 4  | 0.00 | -0.05 | 0.20  | 0.12  | 0.20  | -0.12 | 0.19 |
| 15 | 5  | 0.00 | -0.04 | 0.10  | -0.06 | 0.10  | 0.06  | 0.10 |
| 15 | 6  | 0.00 | -0.02 | 0.10  | 0.06  | 0.10  | -0.06 | 0.10 |
| 15 | 7  | 0.00 | 0.09  | -0.11 | 0.02  | -0.11 | -0.02 | 0.11 |
| 15 | 8  | 0.00 | 0.00  | 0.07  | -0.05 | 0.07  | 0.05  | 0.07 |
| 15 | 9  | 0.00 | 0.14  | -0.02 | -0.10 | -0.02 | 0.10  | 0.12 |
| 15 | 10 | 0.00 | 0.06  | -0.01 | -0.05 | -0.01 | 0.05  | 0.05 |
| 15 | 11 | 0.00 | -0.02 | 0.00  | -0.03 | 0.00  | 0.03  | 0.03 |
| 15 | 12 | 0.00 | -0.11 | 0.13  | 0.02  | 0.13  | -0.02 | 0.12 |
| 15 | 13 | 0.00 | 0.03  | 0.03  | 0.01  | 0.03  | -0.01 | 0.03 |
| 15 | 14 | 0.00 | 0.00  | -0.02 | 0.05  | -0.02 | -0.05 | 0.04 |
| 15 | 15 | 0.00 | -0.03 | -0.13 | -0.01 | -0.13 | 0.01  | 0.11 |
| 15 | 16 | 0.00 | 0.05  | 0.02  | 0.01  | 0.02  | -0.01 | 0.03 |
| 15 | 17 | 0.00 | -0.02 | 0.02  | 0.01  | 0.02  | -0.01 | 0.02 |
| 15 | 18 | 0.00 | -0.02 | 0.00  | -0.05 | 0.00  | 0.05  | 0.04 |
| 15 | 19 | 0.00 | 0.94  | -0.02 | 0.33  | -0.02 | -0.33 | 0.61 |
| 15 | 20 | 0.00 | -0.11 | -0.02 | -0.11 | -0.02 | 0.11  | 0.11 |
| 15 | 21 | 0.00 | -1.38 | -0.32 | -0.58 | -0.32 | 0.58  | 0.96 |
| 15 | 22 | 0.00 | -0.74 | -0.28 | 0.01  | -0.28 | -0.01 | 0.48 |
| 15 | 23 | 0.00 | 0.37  | 0.22  | 0.00  | 0.22  | 0.00  | 0.28 |
| 15 | 24 | 0.00 | 0.26  | 0.09  | 0.04  | 0.09  | -0.04 | 0.17 |
| 15 | 25 | 0.00 | -0.65 | -0.23 | -0.42 | -0.23 | 0.42  | 0.54 |

---

|    |    |      |       |       |       |       |       |      |
|----|----|------|-------|-------|-------|-------|-------|------|
| 15 | 26 | 0.00 | 1.05  | 0.61  | 0.28  | 0.61  | -0.28 | 0.82 |
| 15 | 27 | 0.00 | 0.69  | -0.70 | 0.05  | -0.70 | -0.05 | 0.70 |
| 15 | 28 | 0.00 | -0.35 | -0.01 | 0.79  | -0.01 | -0.79 | 0.68 |
| 15 | 29 | 0.00 | 0.28  | -0.04 | 0.35  | -0.04 | -0.35 | 0.33 |
| 15 | 30 | 0.00 | -0.94 | 0.21  | -0.33 | 0.21  | 0.33  | 0.63 |
| 16 | 0  | 0.00 | 0.11  | -0.13 | 0.33  | -0.13 | -0.33 | 0.30 |
| 16 | 1  | 0.00 | -0.28 | -0.06 | -0.14 | -0.06 | 0.14  | 0.20 |
| 16 | 2  | 0.00 | 0.00  | -0.05 | -0.05 | -0.05 | 0.05  | 0.06 |
| 16 | 3  | 0.00 | -0.20 | -0.06 | 0.09  | -0.06 | -0.09 | 0.15 |
| 16 | 4  | 0.00 | 0.03  | -0.03 | 0.12  | -0.03 | -0.12 | 0.10 |
| 16 | 5  | 0.00 | 0.06  | -0.08 | 0.24  | -0.08 | -0.24 | 0.21 |
| 16 | 6  | 0.00 | -0.01 | -0.07 | -0.01 | -0.07 | 0.01  | 0.06 |
| 16 | 7  | 0.00 | 0.03  | -0.11 | -0.08 | -0.11 | 0.08  | 0.11 |
| 16 | 8  | 0.00 | 0.06  | 0.01  | -0.03 | 0.01  | 0.03  | 0.04 |
| 16 | 9  | 0.00 | -0.02 | -0.01 | -0.02 | -0.01 | 0.02  | 0.02 |
| 16 | 10 | 0.00 | -0.12 | 0.14  | 0.00  | 0.14  | 0.00  | 0.13 |
| 16 | 11 | 0.00 | -1.17 | 2.10  | 0.35  | 2.10  | -0.35 | 1.86 |
| 16 | 12 | 0.00 | 0.06  | 0.02  | -0.10 | 0.02  | 0.10  | 0.09 |
| 16 | 13 | 0.00 | -0.42 | -0.24 | 0.47  | -0.24 | -0.47 | 0.49 |
| 16 | 14 | 0.00 | 0.06  | -0.30 | -0.05 | -0.30 | 0.05  | 0.25 |
| 16 | 15 | 0.00 | 0.11  | -0.22 | -0.03 | -0.22 | 0.03  | 0.19 |
| 16 | 16 | 0.00 | -0.11 | 0.08  | 0.14  | 0.08  | -0.14 | 0.15 |
| 16 | 17 | 0.00 | 0.37  | -0.60 | -0.08 | -0.60 | 0.08  | 0.54 |
| 16 | 18 | 0.00 | 0.03  | 0.10  | -0.15 | 0.10  | 0.15  | 0.15 |
| 16 | 19 | 0.00 | -0.02 | 0.00  | 0.19  | 0.00  | -0.19 | 0.16 |
| 16 | 20 | 0.00 | -0.01 | 0.00  | -0.02 | 0.00  | 0.02  | 0.02 |
| 16 | 21 | 0.00 | 0.03  | -0.03 | 0.01  | -0.03 | -0.01 | 0.03 |
| 16 | 22 | 0.00 | 0.02  | 0.00  | 0.06  | 0.00  | -0.06 | 0.05 |
| 16 | 23 | 0.00 | -0.06 | 0.20  | -0.08 | 0.20  | 0.08  | 0.18 |
| 16 | 24 | 0.00 | 0.01  | 0.03  | -0.02 | 0.03  | 0.02  | 0.03 |
| 16 | 25 | 0.00 | -0.11 | 0.06  | -0.06 | 0.06  | 0.06  | 0.09 |
| 16 | 26 | 0.00 | 0.12  | 0.03  | -0.05 | 0.03  | 0.05  | 0.08 |
| 16 | 27 | 0.00 | 0.03  | 0.00  | -0.01 | 0.00  | 0.01  | 0.02 |
| 16 | 28 | 0.00 | 0.02  | 0.03  | 0.01  | 0.03  | -0.01 | 0.03 |
| 16 | 29 | 0.00 | 0.07  | -0.09 | -0.01 | -0.09 | 0.01  | 0.08 |
| 16 | 30 | 0.00 | 0.01  | -0.07 | -0.01 | -0.07 | 0.01  | 0.06 |
| 17 | 0  | 0.00 | -0.21 | 0.21  | 0.41  | 0.21  | -0.41 | 0.40 |
| 17 | 1  | 0.00 | 0.06  | 0.03  | 0.01  | 0.03  | -0.01 | 0.04 |
| 17 | 2  | 0.00 | 0.25  | 0.07  | 0.17  | 0.07  | -0.17 | 0.21 |
| 17 | 3  | 0.00 | 0.06  | -0.01 | 0.00  | -0.01 | 0.00  | 0.04 |
| 17 | 4  | 0.00 | 0.03  | 0.06  | 0.01  | 0.06  | -0.01 | 0.05 |
| 17 | 5  | 0.00 | -0.04 | 0.14  | -0.05 | 0.14  | 0.05  | 0.12 |
| 17 | 6  | 0.00 | -0.26 | -0.02 | -0.02 | -0.02 | 0.02  | 0.15 |
| 17 | 7  | 0.00 | 0.02  | -0.01 | -0.27 | -0.01 | 0.27  | 0.22 |

---

|    |    |      |       |       |       |       |       |      |
|----|----|------|-------|-------|-------|-------|-------|------|
| 17 | 8  | 0.00 | 0.07  | -0.01 | -0.03 | -0.01 | 0.03  | 0.05 |
| 17 | 9  | 0.00 | 0.00  | 0.02  | -0.05 | 0.02  | 0.05  | 0.04 |
| 17 | 10 | 0.00 | -1.08 | 2.10  | 0.26  | 2.10  | -0.26 | 1.84 |
| 17 | 11 | 0.00 | 0.08  | -0.17 | -0.08 | -0.17 | 0.08  | 0.16 |
| 17 | 12 | 0.00 | -0.07 | 0.16  | 0.12  | 0.16  | -0.12 | 0.17 |
| 17 | 13 | 0.00 | -0.01 | -0.11 | -0.59 | -0.11 | 0.59  | 0.49 |
| 17 | 14 | 0.00 | 0.10  | -0.21 | -0.09 | -0.21 | 0.09  | 0.20 |
| 17 | 15 | 0.00 | 0.28  | -0.56 | -0.10 | -0.56 | 0.10  | 0.49 |
| 17 | 16 | 0.00 | 0.18  | -0.01 | -0.14 | -0.01 | 0.14  | 0.15 |
| 17 | 17 | 0.00 | -0.05 | 0.22  | 0.07  | 0.22  | -0.07 | 0.19 |
| 17 | 18 | 0.00 | -0.05 | -0.08 | -0.03 | -0.08 | 0.03  | 0.08 |
| 17 | 19 | 0.00 | -0.06 | 0.15  | 0.17  | 0.15  | -0.17 | 0.19 |
| 17 | 20 | 0.00 | -0.01 | 0.01  | -0.05 | 0.01  | 0.05  | 0.04 |
| 17 | 21 | 0.00 | 0.02  | 0.11  | 0.00  | 0.11  | 0.00  | 0.09 |
| 17 | 22 | 0.00 | 0.11  | -0.24 | 0.00  | -0.24 | 0.00  | 0.21 |
| 17 | 23 | 0.00 | -0.05 | 0.13  | 0.03  | 0.13  | -0.03 | 0.11 |
| 17 | 24 | 0.00 | 0.00  | 0.02  | 0.00  | 0.02  | 0.00  | 0.02 |
| 17 | 25 | 0.00 | 0.06  | 0.06  | -0.09 | 0.06  | 0.09  | 0.09 |
| 17 | 26 | 0.00 | 0.09  | 0.02  | 0.12  | 0.02  | -0.12 | 0.11 |
| 17 | 27 | 0.00 | -0.01 | 0.06  | 0.05  | 0.06  | -0.05 | 0.06 |
| 17 | 28 | 0.00 | 0.03  | -0.01 | 0.06  | -0.01 | -0.06 | 0.05 |
| 17 | 29 | 0.00 | 0.01  | -0.03 | 0.06  | -0.03 | -0.06 | 0.06 |
| 17 | 30 | 0.00 | -0.01 | 0.18  | -0.04 | 0.18  | 0.04  | 0.15 |
| 18 | 0  | 0.00 | -0.09 | -0.48 | -0.07 | -0.48 | 0.07  | 0.40 |
| 18 | 1  | 0.00 | -0.18 | -0.08 | -0.08 | -0.08 | 0.08  | 0.14 |
| 18 | 2  | 0.00 | -0.05 | 0.05  | 0.02  | 0.05  | -0.02 | 0.05 |
| 18 | 3  | 0.00 | 0.01  | -0.13 | -0.08 | -0.13 | 0.08  | 0.12 |
| 18 | 4  | 0.00 | 0.04  | -0.12 | -0.06 | -0.12 | 0.06  | 0.11 |
| 18 | 5  | 0.00 | -0.03 | -0.26 | -0.15 | -0.26 | 0.15  | 0.25 |
| 18 | 6  | 0.00 | 0.06  | -0.06 | 0.02  | -0.06 | -0.02 | 0.06 |
| 18 | 7  | 0.00 | 0.07  | -0.08 | -0.09 | -0.08 | 0.09  | 0.11 |
| 18 | 8  | 0.00 | -0.02 | 0.00  | 0.00  | 0.00  | 0.00  | 0.01 |
| 18 | 9  | 0.00 | 0.01  | -0.05 | 0.06  | -0.05 | -0.06 | 0.06 |
| 18 | 10 | 0.00 | -0.22 | 0.44  | 0.05  | 0.44  | -0.05 | 0.38 |
| 18 | 11 | 0.00 | -0.02 | 0.08  | 0.00  | 0.08  | 0.00  | 0.07 |
| 18 | 12 | 0.00 | -0.46 | 0.97  | 0.20  | 0.97  | -0.20 | 0.85 |
| 18 | 13 | 0.00 | -0.08 | 0.19  | -0.13 | 0.19  | 0.13  | 0.19 |
| 18 | 14 | 0.00 | 0.43  | -0.75 | -0.15 | -0.75 | 0.15  | 0.67 |
| 18 | 15 | 0.00 | -0.74 | 1.51  | 0.23  | 1.51  | -0.23 | 1.32 |
| 18 | 16 | 0.00 | -0.56 | 0.08  | 0.75  | 0.08  | -0.75 | 0.70 |
| 18 | 17 | 0.00 | -0.22 | 0.36  | 0.13  | 0.36  | -0.13 | 0.34 |
| 18 | 18 | 0.00 | -0.12 | -0.05 | 0.15  | -0.05 | -0.15 | 0.15 |
| 18 | 19 | 0.00 | -0.01 | -0.04 | -0.06 | -0.04 | 0.06  | 0.06 |
| 18 | 20 | 0.00 | -0.01 | -0.02 | 0.02  | -0.02 | -0.02 | 0.02 |

|    |    |      |       |       |       |       |       |      |
|----|----|------|-------|-------|-------|-------|-------|------|
| 18 | 21 | 0.00 | 0.14  | -0.29 | -0.04 | -0.29 | 0.04  | 0.25 |
| 18 | 22 | 0.00 | 0.13  | 0.02  | 0.01  | 0.02  | -0.01 | 0.08 |
| 18 | 23 | 0.00 | 0.13  | -0.24 | -0.04 | -0.24 | 0.04  | 0.21 |
| 18 | 24 | 0.00 | -0.01 | 0.00  | 0.02  | 0.00  | -0.02 | 0.02 |
| 18 | 25 | 0.00 | -0.01 | 0.11  | 0.00  | 0.11  | 0.00  | 0.09 |
| 18 | 26 | 0.00 | -0.06 | 0.11  | 0.06  | 0.11  | -0.06 | 0.11 |
| 18 | 27 | 0.00 | 0.01  | -0.02 | 0.01  | -0.02 | -0.01 | 0.02 |
| 18 | 28 | 0.00 | 0.00  | 0.00  | 0.01  | 0.00  | -0.01 | 0.01 |
| 18 | 29 | 0.00 | -0.09 | 0.11  | 0.01  | 0.11  | -0.01 | 0.10 |
| 18 | 30 | 0.00 | 0.07  | -0.04 | 0.01  | -0.04 | -0.01 | 0.05 |
| 19 | 0  | 0.00 | 1.58  | 0.29  | 0.91  | 0.29  | -0.91 | 1.20 |
| 19 | 1  | 0.00 | 0.49  | 0.10  | -1.55 | 0.10  | 1.55  | 1.30 |
| 19 | 2  | 0.00 | 0.56  | 1.74  | -0.13 | 1.74  | 0.13  | 1.46 |
| 19 | 3  | 0.00 | 0.26  | -0.03 | 0.84  | -0.03 | -0.84 | 0.70 |
| 19 | 4  | 0.00 | 0.75  | -0.19 | 1.74  | -0.19 | -1.74 | 1.49 |
| 19 | 5  | 0.00 | -0.13 | 0.22  | -0.96 | 0.22  | 0.96  | 0.81 |
| 19 | 6  | 0.00 | 0.13  | 0.01  | -0.08 | 0.01  | 0.08  | 0.10 |
| 19 | 7  | 0.00 | -0.04 | -0.11 | -0.19 | -0.11 | 0.19  | 0.18 |
| 19 | 8  | 0.00 | -0.14 | 0.22  | -0.11 | 0.22  | 0.11  | 0.22 |
| 19 | 9  | 0.00 | -0.41 | -0.09 | 0.45  | -0.09 | -0.45 | 0.44 |
| 19 | 10 | 0.00 | 0.10  | 0.03  | -0.04 | 0.03  | 0.04  | 0.07 |
| 19 | 11 | 0.00 | -0.03 | -0.09 | -0.15 | -0.09 | 0.15  | 0.14 |
| 19 | 12 | 0.00 | -0.18 | -0.05 | 0.20  | -0.05 | -0.20 | 0.20 |
| 19 | 13 | 0.00 | -0.08 | 0.00  | -0.03 | 0.00  | 0.03  | 0.05 |
| 19 | 14 | 0.00 | 0.17  | -0.03 | -0.12 | -0.03 | 0.12  | 0.14 |
| 19 | 15 | 0.00 | 0.15  | -0.17 | -0.27 | -0.17 | 0.27  | 0.27 |
| 19 | 16 | 0.00 | -0.06 | 0.06  | 0.05  | 0.06  | -0.05 | 0.07 |
| 19 | 17 | 0.00 | -0.04 | -0.07 | -0.06 | -0.07 | 0.06  | 0.08 |
| 19 | 18 | 0.00 | -0.17 | 0.05  | 0.22  | 0.05  | -0.22 | 0.21 |
| 19 | 19 | 0.00 | 0.92  | 0.15  | -2.76 | 0.15  | 2.76  | 2.32 |
| 19 | 20 | 0.00 | -0.37 | 0.02  | 0.44  | 0.02  | -0.44 | 0.42 |
| 19 | 21 | 0.00 | 0.14  | -0.13 | 0.06  | -0.13 | -0.06 | 0.14 |
| 19 | 22 | 0.00 | 0.25  | 1.52  | -0.93 | 1.52  | 0.93  | 1.46 |
| 19 | 23 | 0.00 | -0.19 | -0.22 | 0.31  | -0.22 | -0.31 | 0.33 |
| 19 | 24 | 0.00 | 0.19  | 0.02  | 0.25  | 0.02  | -0.25 | 0.23 |
| 19 | 25 | 0.00 | 1.06  | -0.01 | 1.76  | -0.01 | -1.76 | 1.56 |
| 19 | 26 | 0.00 | 0.23  | -0.07 | -0.08 | -0.07 | 0.08  | 0.16 |
| 19 | 27 | 0.00 | 0.09  | -0.02 | -0.01 | -0.02 | 0.01  | 0.06 |
| 19 | 28 | 0.00 | -0.04 | 0.04  | 0.10  | 0.04  | -0.10 | 0.09 |
| 19 | 29 | 0.00 | 0.04  | -0.33 | -0.11 | -0.33 | 0.11  | 0.28 |
| 19 | 30 | 0.00 | 1.12  | -0.56 | 0.70  | -0.56 | -0.70 | 0.98 |
| 20 | 0  | 0.00 | -0.13 | -0.21 | 0.35  | -0.21 | -0.35 | 0.34 |
| 20 | 1  | 0.00 | 0.02  | 0.33  | -0.45 | 0.33  | 0.45  | 0.46 |
| 20 | 2  | 0.00 | -0.01 | 0.48  | 0.22  | 0.48  | -0.22 | 0.43 |

|    |    |      |       |       |       |       |       |      |
|----|----|------|-------|-------|-------|-------|-------|------|
| 20 | 3  | 0.00 | 0.05  | 0.34  | -0.22 | 0.34  | 0.22  | 0.33 |
| 20 | 4  | 0.00 | 0.22  | -0.06 | 0.73  | -0.06 | -0.73 | 0.61 |
| 20 | 5  | 0.00 | -0.05 | -0.66 | -0.11 | -0.66 | 0.11  | 0.55 |
| 20 | 6  | 0.00 | 0.27  | -0.48 | -0.38 | -0.48 | 0.38  | 0.52 |
| 20 | 7  | 0.00 | -0.36 | 0.42  | -0.06 | 0.42  | 0.06  | 0.40 |
| 20 | 8  | 0.00 | 0.17  | 0.34  | 0.21  | 0.34  | -0.21 | 0.34 |
| 20 | 9  | 0.00 | -0.14 | -0.10 | 0.09  | -0.10 | -0.09 | 0.14 |
| 20 | 10 | 0.00 | -0.08 | 0.13  | 0.05  | 0.13  | -0.05 | 0.12 |
| 20 | 11 | 0.00 | 0.02  | -0.08 | -0.03 | -0.08 | 0.03  | 0.07 |
| 20 | 12 | 0.00 | -0.01 | -0.21 | 0.07  | -0.21 | -0.07 | 0.18 |
| 20 | 13 | 0.00 | -0.02 | 0.00  | -0.07 | 0.00  | 0.07  | 0.06 |
| 20 | 14 | 0.00 | 0.24  | -0.44 | 0.02  | -0.44 | -0.02 | 0.39 |
| 20 | 15 | 0.00 | 0.06  | -0.27 | -0.07 | -0.27 | 0.07  | 0.23 |
| 20 | 16 | 0.00 | 0.01  | 0.05  | 0.01  | 0.05  | -0.01 | 0.04 |
| 20 | 17 | 0.00 | 0.12  | -0.07 | 0.01  | -0.07 | -0.01 | 0.09 |
| 20 | 18 | 0.00 | 0.07  | 0.19  | 0.09  | 0.19  | -0.09 | 0.18 |
| 20 | 19 | 0.00 | 0.63  | -1.87 | 0.38  | -1.87 | -0.38 | 1.60 |
| 20 | 20 | 0.00 | 0.01  | -0.03 | -0.06 | -0.03 | 0.06  | 0.06 |
| 20 | 21 | 0.00 | 0.21  | -0.41 | -0.18 | -0.41 | 0.18  | 0.39 |
| 20 | 22 | 0.00 | -0.98 | 2.24  | 1.26  | 2.24  | -1.26 | 2.17 |
| 20 | 23 | 0.00 | 1.22  | -2.94 | -0.68 | -2.94 | 0.68  | 2.56 |
| 20 | 24 | 0.00 | 0.13  | -0.02 | -0.12 | -0.02 | 0.12  | 0.12 |
| 20 | 25 | 0.00 | -0.36 | 0.23  | -0.63 | 0.23  | 0.63  | 0.59 |
| 20 | 26 | 0.00 | 0.01  | -0.12 | -0.08 | -0.12 | 0.08  | 0.12 |
| 20 | 27 | 0.00 | 0.03  | 0.04  | -0.07 | 0.04  | 0.07  | 0.07 |
| 20 | 28 | 0.00 | 0.22  | -0.33 | -0.09 | -0.33 | 0.09  | 0.31 |
| 20 | 29 | 0.00 | -0.67 | 1.12  | 0.06  | 1.12  | -0.06 | 0.99 |
| 20 | 30 | 0.00 | 0.40  | -0.61 | -0.96 | -0.61 | 0.96  | 0.96 |
| 21 | 0  | 0.00 | 0.45  | 0.14  | -0.25 | 0.14  | 0.25  | 0.35 |
| 21 | 1  | 0.00 | 0.04  | -0.26 | -0.22 | -0.26 | 0.22  | 0.28 |
| 21 | 2  | 0.00 | 0.14  | 0.18  | 0.07  | 0.18  | -0.07 | 0.18 |
| 21 | 3  | 0.00 | 0.53  | -0.03 | 0.42  | -0.03 | -0.42 | 0.46 |
| 21 | 4  | 0.00 | -0.22 | 0.11  | 0.46  | 0.11  | -0.46 | 0.41 |
| 21 | 5  | 0.00 | 0.00  | 0.30  | 0.35  | 0.30  | -0.35 | 0.38 |
| 21 | 6  | 0.00 | 0.02  | 0.39  | -0.16 | 0.39  | 0.16  | 0.34 |
| 21 | 7  | 0.00 | -0.27 | -0.84 | 0.02  | -0.84 | -0.02 | 0.70 |
| 21 | 8  | 0.00 | 0.11  | 0.10  | -0.80 | 0.10  | 0.80  | 0.66 |
| 21 | 9  | 0.00 | 0.04  | 0.04  | -0.92 | 0.04  | 0.92  | 0.75 |
| 21 | 10 | 0.00 | 0.06  | -0.01 | 0.02  | -0.01 | -0.02 | 0.04 |
| 21 | 11 | 0.00 | 0.06  | -0.03 | -0.02 | -0.03 | 0.02  | 0.05 |
| 21 | 12 | 0.00 | 0.04  | 0.13  | -0.14 | 0.13  | 0.14  | 0.16 |
| 21 | 13 | 0.00 | 0.01  | 0.04  | -0.08 | 0.04  | 0.08  | 0.07 |
| 21 | 14 | 0.00 | 0.05  | -0.21 | -0.07 | -0.21 | 0.07  | 0.18 |
| 21 | 15 | 0.00 | -0.05 | 0.09  | 0.19  | 0.09  | -0.19 | 0.17 |

|    |    |      |       |       |       |       |       |      |
|----|----|------|-------|-------|-------|-------|-------|------|
| 21 | 16 | 0.00 | -0.04 | 0.02  | 0.05  | 0.02  | -0.05 | 0.05 |
| 21 | 17 | 0.00 | 0.01  | -0.09 | -0.06 | -0.09 | 0.06  | 0.09 |
| 21 | 18 | 0.00 | 0.00  | -0.04 | 0.07  | -0.04 | -0.07 | 0.07 |
| 21 | 19 | 0.00 | -0.07 | -0.33 | 0.45  | -0.33 | -0.45 | 0.46 |
| 21 | 20 | 0.00 | 0.07  | -0.02 | -0.10 | -0.02 | 0.10  | 0.09 |
| 21 | 21 | 0.00 | 0.06  | -0.13 | -0.04 | -0.13 | 0.04  | 0.12 |
| 21 | 22 | 0.00 | -1.27 | 2.62  | 0.12  | 2.62  | -0.12 | 2.26 |
| 21 | 23 | 0.00 | -1.57 | 3.30  | -0.87 | 3.30  | 0.87  | 2.93 |
| 21 | 24 | 0.00 | 0.00  | 0.01  | -0.09 | 0.01  | 0.09  | 0.07 |
| 21 | 25 | 0.00 | -0.06 | -0.06 | -0.36 | -0.06 | 0.36  | 0.30 |
| 21 | 26 | 0.00 | 0.18  | -0.17 | -0.06 | -0.17 | 0.06  | 0.18 |
| 21 | 27 | 0.00 | 0.02  | -0.37 | 0.13  | -0.37 | -0.13 | 0.32 |
| 21 | 28 | 0.00 | -0.46 | 0.80  | 0.02  | 0.80  | -0.02 | 0.71 |
| 21 | 29 | 0.00 | 1.23  | -2.71 | 0.39  | -2.71 | -0.39 | 2.35 |
| 21 | 30 | 0.00 | 0.96  | -1.90 | -0.08 | -1.90 | 0.08  | 1.65 |
| 22 | 0  | 0.00 | -0.58 | -0.75 | -1.24 | -0.75 | 1.24  | 1.23 |
| 22 | 1  | 0.00 | -0.34 | -0.09 | 1.18  | -0.09 | -1.18 | 0.99 |
| 22 | 2  | 0.00 | -0.47 | -1.35 | -0.01 | -1.35 | 0.01  | 1.14 |
| 22 | 3  | 0.00 | 0.08  | 0.13  | -0.56 | 0.13  | 0.56  | 0.47 |
| 22 | 4  | 0.00 | -0.33 | 0.22  | -1.23 | 0.22  | 1.23  | 1.04 |
| 22 | 5  | 0.00 | -0.01 | -0.20 | 0.86  | -0.20 | -0.86 | 0.72 |
| 22 | 6  | 0.00 | -0.09 | 0.04  | 0.09  | 0.04  | -0.09 | 0.10 |
| 22 | 7  | 0.00 | -0.01 | -0.15 | 0.11  | -0.15 | -0.11 | 0.15 |
| 22 | 8  | 0.00 | 0.13  | -0.06 | 0.10  | -0.06 | -0.10 | 0.12 |
| 22 | 9  | 0.00 | 0.20  | 0.41  | -0.49 | 0.41  | 0.49  | 0.53 |
| 22 | 10 | 0.00 | 0.09  | -0.04 | -0.06 | -0.04 | 0.06  | 0.08 |
| 22 | 11 | 0.00 | -0.06 | 0.01  | 0.02  | 0.01  | -0.02 | 0.04 |
| 22 | 12 | 0.00 | -0.61 | 0.07  | 0.40  | 0.07  | -0.40 | 0.48 |
| 22 | 13 | 0.00 | -0.13 | 0.03  | 0.22  | 0.03  | -0.22 | 0.20 |
| 22 | 14 | 0.00 | -0.01 | 0.14  | 0.15  | 0.14  | -0.15 | 0.17 |
| 22 | 15 | 0.00 | 0.04  | -0.07 | -0.55 | -0.07 | 0.55  | 0.45 |
| 22 | 16 | 0.00 | 0.01  | 0.00  | -0.01 | 0.00  | 0.01  | 0.01 |
| 22 | 17 | 0.00 | 0.06  | 0.05  | 0.08  | 0.05  | -0.08 | 0.08 |
| 22 | 18 | 0.00 | 0.11  | 0.03  | -0.15 | 0.03  | 0.15  | 0.14 |
| 22 | 19 | 0.00 | -0.38 | -0.16 | 1.10  | -0.16 | -1.10 | 0.93 |
| 22 | 20 | 0.00 | 0.27  | -0.03 | -0.26 | -0.03 | 0.26  | 0.26 |
| 22 | 21 | 0.00 | -0.06 | 0.08  | 0.06  | 0.08  | -0.06 | 0.09 |
| 22 | 22 | 0.00 | -0.43 | 0.05  | 0.60  | 0.05  | -0.60 | 0.55 |
| 22 | 23 | 0.00 | -0.44 | 0.61  | -0.10 | 0.61  | 0.10  | 0.57 |
| 22 | 24 | 0.00 | -0.12 | 0.05  | -0.11 | 0.05  | 0.11  | 0.12 |
| 22 | 25 | 0.00 | -0.84 | 0.15  | -0.47 | 0.15  | 0.47  | 0.63 |
| 22 | 26 | 0.00 | -0.08 | -0.05 | -0.05 | -0.05 | 0.05  | 0.07 |
| 22 | 27 | 0.00 | -0.06 | -0.03 | 0.08  | -0.03 | -0.08 | 0.08 |
| 22 | 28 | 0.00 | -0.06 | 0.11  | -0.07 | 0.11  | 0.07  | 0.11 |

|    |    |      |       |       |       |       |       |      |
|----|----|------|-------|-------|-------|-------|-------|------|
| 22 | 29 | 0.00 | 0.15  | -0.40 | 0.18  | -0.40 | -0.18 | 0.37 |
| 22 | 30 | 0.00 | -0.38 | -0.15 | -0.15 | -0.15 | 0.15  | 0.28 |
| 23 | 0  | 0.00 | 5.57  | 0.60  | 4.09  | 0.60  | -4.09 | 4.66 |
| 23 | 1  | 0.00 | 0.78  | -0.63 | -5.48 | -0.63 | 5.48  | 4.53 |
| 23 | 2  | 0.00 | 3.41  | 6.55  | 0.91  | 6.55  | -0.91 | 5.75 |
| 23 | 3  | 0.00 | 0.66  | -0.06 | 2.98  | -0.06 | -2.98 | 2.46 |
| 23 | 4  | 0.00 | 1.32  | 0.23  | 7.29  | 0.23  | -7.29 | 6.00 |
| 23 | 5  | 0.00 | -0.16 | 0.70  | -3.75 | 0.70  | 3.75  | 3.12 |
| 23 | 6  | 0.00 | 0.10  | -0.83 | -0.07 | -0.83 | 0.07  | 0.68 |
| 23 | 7  | 0.00 | 0.08  | -0.22 | -0.06 | -0.22 | 0.06  | 0.19 |
| 23 | 8  | 0.00 | 0.02  | 0.34  | -1.47 | 0.34  | 1.47  | 1.23 |
| 23 | 9  | 0.00 | 0.16  | -0.17 | 1.30  | -0.17 | -1.30 | 1.07 |
| 23 | 10 | 0.00 | 0.00  | -0.01 | 0.05  | -0.01 | -0.05 | 0.04 |
| 23 | 11 | 0.00 | -0.04 | -0.10 | -0.13 | -0.10 | 0.13  | 0.14 |
| 23 | 12 | 0.00 | 0.02  | 0.00  | 0.15  | 0.00  | -0.15 | 0.12 |
| 23 | 13 | 0.00 | 0.02  | -0.01 | -0.76 | -0.01 | 0.76  | 0.62 |
| 23 | 14 | 0.00 | -0.33 | 0.39  | 0.01  | 0.39  | -0.01 | 0.37 |
| 23 | 15 | 0.00 | 0.18  | -0.15 | -0.06 | -0.15 | 0.06  | 0.17 |
| 23 | 16 | 0.00 | -0.02 | 0.00  | 0.06  | 0.00  | -0.06 | 0.05 |
| 23 | 17 | 0.00 | 0.04  | 0.04  | 0.12  | 0.04  | -0.12 | 0.11 |
| 23 | 18 | 0.00 | -0.01 | -0.03 | -0.01 | -0.03 | 0.01  | 0.03 |
| 23 | 19 | 0.00 | -0.91 | -0.33 | -0.02 | -0.33 | 0.02  | 0.59 |
| 23 | 20 | 0.00 | -0.82 | 0.34  | 0.52  | 0.34  | -0.52 | 0.69 |
| 23 | 21 | 0.00 | 0.91  | -0.08 | -0.21 | -0.08 | 0.21  | 0.56 |
| 23 | 22 | 0.00 | 1.52  | 0.29  | 0.01  | 0.29  | -0.01 | 0.91 |
| 23 | 23 | 0.00 | 0.36  | -0.47 | -1.25 | -0.47 | 1.25  | 1.11 |
| 23 | 24 | 0.00 | 0.28  | -0.06 | -0.29 | -0.06 | 0.29  | 0.29 |
| 23 | 25 | 0.00 | 3.72  | -1.23 | -1.94 | -1.23 | 1.94  | 2.85 |
| 23 | 26 | 0.00 | 0.27  | -0.10 | 0.05  | -0.10 | -0.05 | 0.18 |
| 23 | 27 | 0.00 | 0.20  | 0.05  | -0.10 | 0.05  | 0.10  | 0.15 |
| 23 | 28 | 0.00 | 0.05  | -0.15 | 0.04  | -0.15 | -0.04 | 0.13 |
| 23 | 29 | 0.00 | 0.18  | 0.24  | 0.13  | 0.24  | -0.13 | 0.25 |
| 23 | 30 | 0.00 | 1.49  | -0.26 | -2.21 | -0.26 | 2.21  | 2.01 |
| 24 | 0  | 0.00 | -0.55 | 0.20  | -0.92 | 0.20  | 0.92  | 0.83 |
| 24 | 1  | 0.00 | -0.05 | 0.42  | 0.18  | 0.42  | -0.18 | 0.37 |
| 24 | 2  | 0.00 | -0.21 | -0.45 | -0.01 | -0.45 | 0.01  | 0.39 |
| 24 | 3  | 0.00 | -0.14 | 0.14  | -0.21 | 0.14  | 0.21  | 0.22 |
| 24 | 4  | 0.00 | 0.03  | -0.04 | -0.48 | -0.04 | 0.48  | 0.39 |
| 24 | 5  | 0.00 | 0.11  | -0.33 | 0.31  | -0.33 | -0.31 | 0.38 |
| 24 | 6  | 0.00 | 0.14  | -0.08 | 0.00  | -0.08 | 0.00  | 0.10 |
| 24 | 7  | 0.00 | -0.02 | -0.61 | -0.05 | -0.61 | 0.05  | 0.50 |
| 24 | 8  | 0.00 | 0.06  | 0.07  | 0.05  | 0.07  | -0.05 | 0.08 |
| 24 | 9  | 0.00 | -0.09 | -0.10 | -0.28 | -0.10 | 0.28  | 0.25 |
| 24 | 10 | 0.00 | -0.07 | 0.20  | 0.02  | 0.20  | -0.02 | 0.17 |



|    |    |      |       |       |       |       |       |      |
|----|----|------|-------|-------|-------|-------|-------|------|
| 24 | 11 | 0.00 | -0.17 | 0.21  | -0.05 | 0.21  | 0.05  | 0.20 |
| 24 | 12 | 0.00 | -0.24 | 0.57  | 0.03  | 0.57  | -0.03 | 0.49 |
| 24 | 13 | 0.00 | 0.04  | -0.12 | 0.07  | -0.12 | -0.07 | 0.12 |
| 24 | 14 | 0.00 | -0.66 | 1.50  | 0.04  | 1.50  | -0.04 | 1.28 |
| 24 | 15 | 0.00 | -0.13 | 0.29  | -0.02 | 0.29  | 0.02  | 0.25 |
| 24 | 16 | 0.00 | 0.08  | 0.06  | 0.03  | 0.06  | -0.03 | 0.07 |
| 24 | 17 | 0.00 | -0.12 | 0.13  | -0.13 | 0.13  | 0.13  | 0.17 |
| 24 | 18 | 0.00 | -0.20 | -0.31 | -0.34 | -0.31 | 0.34  | 0.39 |
| 24 | 19 | 0.00 | 0.20  | -0.76 | 0.11  | -0.76 | -0.11 | 0.64 |
| 24 | 20 | 0.00 | 0.06  | -0.07 | -0.04 | -0.07 | 0.04  | 0.07 |
| 24 | 21 | 0.00 | 0.02  | -0.16 | -0.03 | -0.16 | 0.03  | 0.13 |
| 24 | 22 | 0.00 | -0.64 | 2.10  | 0.15  | 2.10  | -0.15 | 1.76 |
| 24 | 23 | 0.00 | -0.04 | 0.64  | -0.91 | 0.64  | 0.91  | 0.91 |
| 24 | 24 | 0.00 | -0.01 | -0.07 | -0.02 | -0.07 | 0.02  | 0.06 |
| 24 | 25 | 0.00 | -0.56 | 0.24  | 0.02  | 0.24  | -0.02 | 0.38 |
| 24 | 26 | 0.00 | 0.03  | -0.07 | -0.08 | -0.07 | 0.08  | 0.09 |
| 24 | 27 | 0.00 | 0.01  | -0.18 | 0.01  | -0.18 | -0.01 | 0.15 |
| 24 | 28 | 0.00 | -0.16 | 0.25  | -0.05 | 0.25  | 0.05  | 0.23 |
| 24 | 29 | 0.00 | 0.47  | -1.21 | 0.04  | -1.21 | -0.04 | 1.03 |
| 24 | 30 | 0.00 | 0.53  | -1.25 | -0.11 | -1.25 | 0.11  | 1.07 |
| 25 | 0  | 0.00 | 0.76  | 0.29  | 0.20  | 0.29  | -0.20 | 0.52 |
| 25 | 1  | 0.00 | -0.08 | -0.13 | -0.85 | -0.13 | 0.85  | 0.70 |
| 25 | 2  | 0.00 | 0.78  | 1.19  | 0.35  | 1.19  | -0.35 | 1.11 |
| 25 | 3  | 0.00 | 0.07  | -0.04 | 0.76  | -0.04 | -0.76 | 0.62 |
| 25 | 4  | 0.00 | 0.33  | 0.11  | 1.44  | 0.11  | -1.44 | 1.19 |
| 25 | 5  | 0.00 | -0.16 | 0.14  | -0.56 | 0.14  | 0.56  | 0.48 |
| 25 | 6  | 0.00 | 0.16  | 0.29  | 0.06  | 0.29  | -0.06 | 0.26 |
| 25 | 7  | 0.00 | 0.04  | -0.60 | -0.11 | -0.60 | 0.11  | 0.50 |
| 25 | 8  | 0.00 | 0.09  | 0.13  | -0.41 | 0.13  | 0.41  | 0.36 |
| 25 | 9  | 0.00 | -0.04 | -0.04 | -0.01 | -0.04 | 0.01  | 0.04 |
| 25 | 10 | 0.00 | 0.08  | -0.14 | -0.08 | -0.14 | 0.08  | 0.14 |
| 25 | 11 | 0.00 | 0.11  | -0.23 | -0.05 | -0.23 | 0.05  | 0.20 |
| 25 | 12 | 0.00 | 0.21  | -0.31 | -0.06 | -0.31 | 0.06  | 0.28 |
| 25 | 13 | 0.00 | -0.03 | 0.05  | -0.04 | 0.05  | 0.04  | 0.06 |
| 25 | 14 | 0.00 | 0.66  | -0.53 | -0.36 | -0.53 | 0.36  | 0.65 |
| 25 | 15 | 0.00 | 0.18  | -0.20 | -0.27 | -0.20 | 0.27  | 0.29 |
| 25 | 16 | 0.00 | -0.04 | -0.07 | -0.05 | -0.07 | 0.05  | 0.07 |
| 25 | 17 | 0.00 | -0.08 | -0.13 | -0.32 | -0.13 | 0.32  | 0.29 |
| 25 | 18 | 0.00 | 0.06  | 0.07  | 0.24  | 0.07  | -0.24 | 0.21 |
| 25 | 19 | 0.00 | -0.90 | -0.40 | 3.24  | -0.40 | -3.24 | 2.72 |
| 25 | 20 | 0.00 | -0.05 | 0.06  | -0.24 | 0.06  | 0.24  | 0.20 |
| 25 | 21 | 0.00 | 0.27  | 0.07  | -0.14 | 0.07  | 0.14  | 0.20 |
| 25 | 22 | 0.00 | 0.13  | 0.14  | 0.96  | 0.14  | -0.96 | 0.80 |
| 25 | 23 | 0.00 | -0.13 | 1.85  | -1.77 | 1.85  | 1.77  | 2.09 |

|    |    |      |       |       |       |       |       |      |
|----|----|------|-------|-------|-------|-------|-------|------|
| 25 | 24 | 0.00 | -0.04 | -0.24 | -0.42 | -0.24 | 0.42  | 0.40 |
| 25 | 25 | 0.00 | -0.07 | -0.62 | -2.82 | -0.62 | 2.82  | 2.36 |
| 25 | 26 | 0.00 | 0.20  | 0.00  | 0.08  | 0.00  | -0.08 | 0.13 |
| 25 | 27 | 0.00 | 0.05  | -0.13 | 0.07  | -0.13 | -0.07 | 0.12 |
| 25 | 28 | 0.00 | -0.38 | 0.37  | 0.00  | 0.37  | 0.00  | 0.37 |
| 25 | 29 | 0.00 | 0.92  | -1.08 | 0.68  | -1.08 | -0.68 | 1.17 |
| 25 | 30 | 0.00 | 0.01  | -0.57 | -1.86 | -0.57 | 1.86  | 1.59 |
| 26 | 0  | 0.00 | 0.32  | -0.57 | -0.39 | -0.57 | 0.39  | 0.59 |
| 26 | 1  | 0.00 | 0.44  | 0.11  | -0.26 | 0.11  | 0.26  | 0.34 |
| 26 | 2  | 0.00 | -0.19 | -0.05 | -0.48 | -0.05 | 0.48  | 0.41 |
| 26 | 3  | 0.00 | -0.35 | -0.08 | 0.34  | -0.08 | -0.34 | 0.35 |
| 26 | 4  | 0.00 | -0.15 | 0.01  | -0.40 | 0.01  | 0.40  | 0.34 |
| 26 | 5  | 0.00 | 0.27  | 0.22  | 0.01  | 0.22  | -0.01 | 0.24 |
| 26 | 6  | 0.00 | -0.12 | 0.63  | -0.21 | 0.63  | 0.21  | 0.55 |
| 26 | 7  | 0.00 | -0.05 | -0.67 | -0.19 | -0.67 | 0.19  | 0.57 |
| 26 | 8  | 0.00 | -0.35 | -0.26 | -0.53 | -0.26 | 0.53  | 0.52 |
| 26 | 9  | 0.00 | 0.31  | 0.07  | -0.16 | 0.07  | 0.16  | 0.23 |
| 26 | 10 | 0.00 | -0.01 | 0.03  | 0.09  | 0.03  | -0.09 | 0.08 |
| 26 | 11 | 0.00 | 0.04  | 0.00  | -0.06 | 0.00  | 0.06  | 0.05 |
| 26 | 12 | 0.00 | 0.12  | -0.23 | 0.14  | -0.23 | -0.14 | 0.23 |
| 26 | 13 | 0.00 | 0.00  | 0.04  | -0.02 | 0.04  | 0.02  | 0.04 |
| 26 | 14 | 0.00 | 0.31  | -0.56 | -0.01 | -0.56 | 0.01  | 0.49 |
| 26 | 15 | 0.00 | 0.08  | -0.18 | 0.00  | -0.18 | 0.00  | 0.15 |
| 26 | 16 | 0.00 | 0.07  | -0.03 | -0.06 | -0.03 | 0.06  | 0.07 |
| 26 | 17 | 0.00 | 0.10  | -0.03 | 0.10  | -0.03 | -0.10 | 0.10 |
| 26 | 18 | 0.00 | 0.13  | -0.07 | 0.21  | -0.07 | -0.21 | 0.20 |
| 26 | 19 | 0.00 | 0.27  | 1.05  | -3.15 | 1.05  | 3.15  | 2.72 |
| 26 | 20 | 0.00 | -0.16 | -0.09 | 0.39  | -0.09 | -0.39 | 0.34 |
| 26 | 21 | 0.00 | -0.19 | 0.12  | 0.24  | 0.12  | -0.24 | 0.25 |
| 26 | 22 | 0.00 | -0.10 | 0.75  | -2.48 | 0.75  | 2.48  | 2.12 |
| 26 | 23 | 0.00 | -0.66 | 2.66  | 0.56  | 2.66  | -0.56 | 2.25 |
| 26 | 24 | 0.00 | 0.09  | -0.15 | 0.42  | -0.15 | -0.42 | 0.37 |
| 26 | 25 | 0.00 | 1.02  | 0.20  | 2.85  | 0.20  | -2.85 | 2.41 |
| 26 | 26 | 0.00 | -0.10 | -0.05 | -0.04 | -0.05 | 0.04  | 0.08 |
| 26 | 27 | 0.00 | 0.01  | -0.23 | -0.08 | -0.23 | 0.08  | 0.20 |
| 26 | 28 | 0.00 | -0.26 | 0.55  | -0.03 | 0.55  | 0.03  | 0.47 |
| 26 | 29 | 0.00 | 0.88  | -1.88 | -0.48 | -1.88 | 0.48  | 1.66 |
| 26 | 30 | 0.00 | 0.75  | -0.69 | 1.89  | -0.69 | -1.89 | 1.70 |
| 27 | 0  | 0.00 | -0.77 | -0.14 | -1.03 | -0.14 | 1.03  | 0.96 |
| 27 | 1  | 0.00 | -0.37 | 0.47  | -0.03 | 0.47  | 0.03  | 0.44 |
| 27 | 2  | 0.00 | 0.37  | 0.30  | 0.04  | 0.30  | -0.04 | 0.33 |
| 27 | 3  | 0.00 | -0.15 | 0.67  | -0.34 | 0.67  | 0.34  | 0.62 |
| 27 | 4  | 0.00 | 0.22  | -0.39 | -0.12 | -0.39 | 0.12  | 0.36 |
| 27 | 5  | 0.00 | 0.07  | -0.70 | 0.35  | -0.70 | -0.35 | 0.64 |

|    |    |      |       |       |       |       |       |      |
|----|----|------|-------|-------|-------|-------|-------|------|
| 27 | 6  | 0.00 | 0.01  | -0.40 | 0.09  | -0.40 | -0.09 | 0.33 |
| 27 | 7  | 0.00 | 0.23  | -0.15 | -0.09 | -0.15 | 0.09  | 0.20 |
| 27 | 8  | 0.00 | 0.29  | 0.22  | 0.39  | 0.22  | -0.39 | 0.40 |
| 27 | 9  | 0.00 | -0.11 | -0.19 | -0.31 | -0.19 | 0.31  | 0.30 |
| 27 | 10 | 0.00 | 0.05  | -0.01 | 0.00  | -0.01 | 0.00  | 0.03 |
| 27 | 11 | 0.00 | -0.02 | -0.07 | -0.03 | -0.07 | 0.03  | 0.06 |
| 27 | 12 | 0.00 | 0.22  | -0.32 | -0.14 | -0.32 | 0.14  | 0.31 |
| 27 | 13 | 0.00 | 0.01  | -0.04 | 0.03  | -0.04 | -0.03 | 0.04 |
| 27 | 14 | 0.00 | 0.13  | -0.19 | -0.04 | -0.19 | 0.04  | 0.18 |
| 27 | 15 | 0.00 | 0.05  | -0.05 | 0.00  | -0.05 | 0.00  | 0.05 |
| 27 | 16 | 0.00 | -0.02 | 0.13  | 0.00  | 0.13  | 0.00  | 0.11 |
| 27 | 17 | 0.00 | -0.04 | -0.06 | 0.03  | -0.06 | -0.03 | 0.06 |
| 27 | 18 | 0.00 | 0.06  | 0.12  | 0.11  | 0.12  | -0.11 | 0.14 |
| 27 | 19 | 0.00 | 0.32  | -1.51 | -1.15 | -1.51 | 1.15  | 1.56 |
| 27 | 20 | 0.00 | 0.05  | -0.12 | 0.05  | -0.12 | -0.05 | 0.11 |
| 27 | 21 | 0.00 | 0.13  | -0.33 | -0.10 | -0.33 | 0.10  | 0.29 |
| 27 | 22 | 0.00 | -0.08 | 3.25  | 1.07  | 3.25  | -1.07 | 2.79 |
| 27 | 23 | 0.00 | 0.18  | -2.21 | -0.57 | -2.21 | 0.57  | 1.87 |
| 27 | 24 | 0.00 | 0.11  | 0.01  | -0.01 | 0.01  | 0.01  | 0.06 |
| 27 | 25 | 0.00 | -0.46 | 0.47  | 0.63  | 0.47  | -0.63 | 0.69 |
| 27 | 26 | 0.00 | 0.08  | -0.19 | -0.19 | -0.19 | 0.19  | 0.22 |
| 27 | 27 | 0.00 | -0.12 | 0.11  | 0.10  | 0.11  | -0.10 | 0.14 |
| 27 | 28 | 0.00 | 0.21  | -0.11 | -0.08 | -0.11 | 0.08  | 0.16 |
| 27 | 29 | 0.00 | -0.59 | 0.19  | -0.22 | 0.19  | 0.22  | 0.42 |
| 27 | 30 | 0.00 | 0.96  | -0.91 | 0.18  | -0.91 | -0.18 | 0.94 |
| 28 | 0  | 0.00 | 0.24  | 0.15  | 0.51  | 0.15  | -0.51 | 0.46 |
| 28 | 1  | 0.00 | 0.12  | -0.23 | 0.02  | -0.23 | -0.02 | 0.20 |
| 28 | 2  | 0.00 | -0.14 | -0.11 | -0.02 | -0.11 | 0.02  | 0.12 |
| 28 | 3  | 0.00 | 0.11  | -0.17 | -0.26 | -0.17 | 0.26  | 0.26 |
| 28 | 4  | 0.00 | -0.16 | 0.10  | 0.13  | 0.10  | -0.13 | 0.16 |
| 28 | 5  | 0.00 | 0.02  | -0.01 | -0.16 | -0.01 | 0.16  | 0.13 |
| 28 | 6  | 0.00 | -0.18 | -0.49 | -0.14 | -0.49 | 0.14  | 0.43 |
| 28 | 7  | 0.00 | -0.08 | 0.76  | 0.15  | 0.76  | -0.15 | 0.63 |
| 28 | 8  | 0.00 | -0.05 | 0.34  | 0.13  | 0.34  | -0.13 | 0.30 |
| 28 | 9  | 0.00 | 0.27  | -0.14 | 0.41  | -0.14 | -0.41 | 0.39 |
| 28 | 10 | 0.00 | 0.14  | 0.09  | -0.10 | 0.09  | 0.10  | 0.14 |
| 28 | 11 | 0.00 | -0.01 | 0.07  | -0.23 | 0.07  | 0.23  | 0.20 |
| 28 | 12 | 0.00 | -0.01 | 0.17  | -0.09 | 0.17  | 0.09  | 0.16 |
| 28 | 13 | 0.00 | 0.01  | 0.06  | 0.04  | 0.06  | -0.04 | 0.06 |
| 28 | 14 | 0.00 | 0.16  | 0.26  | -0.35 | 0.26  | 0.35  | 0.37 |
| 28 | 15 | 0.00 | 0.11  | 0.05  | -0.04 | 0.05  | 0.04  | 0.08 |
| 28 | 16 | 0.00 | 0.01  | -0.07 | 0.04  | -0.07 | -0.04 | 0.07 |
| 28 | 17 | 0.00 | -0.16 | -0.19 | -0.40 | -0.19 | 0.40  | 0.37 |
| 28 | 18 | 0.00 | 0.08  | 0.02  | -0.04 | 0.02  | 0.04  | 0.06 |

|    |    |      |        |       |       |       |       |      |
|----|----|------|--------|-------|-------|-------|-------|------|
| 28 | 19 | 0.00 | 0.22   | 0.37  | -1.30 | 0.37  | 1.30  | 1.11 |
| 28 | 20 | 0.00 | -0.02  | 0.04  | 0.15  | 0.04  | -0.15 | 0.13 |
| 28 | 21 | 0.00 | -0.04  | 0.05  | 0.09  | 0.05  | -0.09 | 0.09 |
| 28 | 22 | 0.00 | 0.35   | -1.55 | -0.38 | -1.55 | 0.38  | 1.32 |
| 28 | 23 | 0.00 | 0.66   | -2.04 | 1.47  | -2.04 | -1.47 | 2.09 |
| 28 | 24 | 0.00 | 0.08   | 0.14  | 0.14  | 0.14  | -0.14 | 0.17 |
| 28 | 25 | 0.00 | 0.57   | 0.10  | 1.05  | 0.10  | -1.05 | 0.92 |
| 28 | 26 | 0.00 | -0.17  | 0.03  | -0.05 | 0.03  | 0.05  | 0.11 |
| 28 | 27 | 0.00 | -0.01  | 0.20  | -0.12 | 0.20  | 0.12  | 0.19 |
| 28 | 28 | 0.00 | 0.34   | -0.53 | -0.02 | -0.53 | 0.02  | 0.48 |
| 28 | 29 | 0.00 | -0.89  | 1.69  | -0.49 | 1.69  | 0.49  | 1.53 |
| 28 | 30 | 0.00 | -0.51  | 1.12  | 0.44  | 1.12  | -0.44 | 1.03 |
| 29 | 0  | 0.00 | -13.93 | -4.36 | -4.34 | -4.36 | 4.34  | 9.48 |
| 29 | 1  | 0.00 | 0.44   | -1.00 | -0.84 | -1.00 | 0.84  | 1.10 |
| 29 | 2  | 0.00 | 0.33   | 1.37  | 0.50  | 1.37  | -0.50 | 1.21 |
| 29 | 3  | 0.00 | 0.73   | 0.42  | -4.69 | 0.42  | 4.69  | 3.87 |
| 29 | 4  | 0.00 | -0.36  | 1.45  | 2.28  | 1.45  | -2.28 | 2.22 |
| 29 | 5  | 0.00 | -1.68  | 0.28  | 1.68  | 0.28  | -1.68 | 1.70 |
| 29 | 6  | 0.00 | -2.60  | -8.20 | -1.15 | -8.20 | 1.15  | 6.93 |
| 29 | 7  | 0.00 | -0.40  | -2.27 | -1.22 | -2.27 | 1.22  | 2.12 |
| 29 | 8  | 0.00 | 1.89   | 1.32  | 5.78  | 1.32  | -5.78 | 4.96 |
| 29 | 9  | 0.00 | -0.83  | -0.61 | -2.86 | -0.61 | 2.86  | 2.44 |
| 29 | 10 | 0.00 | -0.04  | 0.16  | 0.11  | 0.16  | -0.11 | 0.16 |
| 29 | 11 | 0.00 | -0.06  | -0.17 | -0.03 | -0.17 | 0.03  | 0.15 |
| 29 | 12 | 0.00 | -0.18  | -0.22 | -0.22 | -0.22 | 0.22  | 0.27 |
| 29 | 13 | 0.00 | 0.13   | -0.06 | 0.34  | -0.06 | -0.34 | 0.29 |
| 29 | 14 | 0.00 | -0.25  | 0.50  | 0.40  | 0.50  | -0.40 | 0.54 |
| 29 | 15 | 0.00 | -0.08  | -0.66 | -0.26 | -0.66 | 0.26  | 0.58 |
| 29 | 16 | 0.00 | -0.04  | 0.00  | -0.08 | 0.00  | 0.08  | 0.07 |
| 29 | 17 | 0.00 | -0.07  | -0.05 | -0.01 | -0.05 | 0.01  | 0.06 |
| 29 | 18 | 0.00 | -0.09  | -0.02 | -0.13 | -0.02 | 0.13  | 0.12 |
| 29 | 19 | 0.00 | 2.33   | 1.05  | 1.15  | 1.05  | -1.15 | 1.85 |
| 29 | 20 | 0.00 | -0.06  | -0.05 | 0.11  | -0.05 | -0.11 | 0.10 |
| 29 | 21 | 0.00 | -0.13  | 0.24  | 0.33  | 0.24  | -0.33 | 0.34 |
| 29 | 22 | 0.00 | -0.05  | -0.50 | -1.09 | -0.50 | 1.09  | 0.98 |
| 29 | 23 | 0.00 | 0.06   | -0.81 | 0.64  | -0.81 | -0.64 | 0.84 |
| 29 | 24 | 0.00 | 1.69   | -0.08 | -0.24 | -0.08 | 0.24  | 1.00 |
| 29 | 25 | 0.00 | 0.02   | -0.28 | 1.32  | -0.28 | -1.32 | 1.10 |
| 29 | 26 | 0.00 | -0.08  | -0.52 | -0.47 | -0.52 | 0.47  | 0.57 |
| 29 | 27 | 0.00 | 0.29   | -0.31 | -0.02 | -0.31 | 0.02  | 0.30 |
| 29 | 28 | 0.00 | -0.33  | 0.53  | -0.19 | 0.53  | 0.19  | 0.50 |
| 29 | 29 | 0.00 | 1.20   | -1.67 | 0.49  | -1.67 | -0.49 | 1.58 |
| 29 | 30 | 0.00 | -1.32  | -1.02 | -2.01 | -1.02 | 2.01  | 1.99 |
| 30 | 0  | 0.00 | -5.67  | -1.95 | -1.33 | -1.95 | 1.33  | 3.80 |

|    |    |      |       |       |       |       |       |      |
|----|----|------|-------|-------|-------|-------|-------|------|
| 30 | 1  | 0.00 | 0.34  | -0.39 | -0.35 | -0.39 | 0.35  | 0.47 |
| 30 | 2  | 0.00 | 0.03  | 0.13  | 0.00  | 0.13  | 0.00  | 0.11 |
| 30 | 3  | 0.00 | 0.25  | 0.26  | -1.92 | 0.26  | 1.92  | 1.59 |
| 30 | 4  | 0.00 | -0.07 | 0.48  | 1.49  | 0.48  | -1.49 | 1.28 |
| 30 | 5  | 0.00 | -0.81 | 0.28  | 0.36  | 0.28  | -0.36 | 0.60 |
| 30 | 6  | 0.00 | -1.12 | -3.65 | -0.49 | -3.65 | 0.49  | 3.08 |
| 30 | 7  | 0.00 | -0.07 | -0.74 | -0.47 | -0.74 | 0.47  | 0.72 |
| 30 | 8  | 0.00 | 0.84  | 0.63  | 2.51  | 0.63  | -2.51 | 2.17 |
| 30 | 9  | 0.00 | -0.34 | -0.31 | -0.96 | -0.31 | 0.96  | 0.85 |
| 30 | 10 | 0.00 | 0.16  | 0.08  | -0.12 | 0.08  | 0.12  | 0.15 |
| 30 | 11 | 0.00 | 0.11  | -0.04 | -0.17 | -0.04 | 0.17  | 0.16 |
| 30 | 12 | 0.00 | 0.14  | -0.09 | -0.30 | -0.09 | 0.30  | 0.27 |
| 30 | 13 | 0.00 | 0.10  | 0.01  | 0.11  | 0.01  | -0.11 | 0.11 |
| 30 | 14 | 0.00 | 0.38  | 0.23  | -0.35 | 0.23  | 0.35  | 0.41 |
| 30 | 15 | 0.00 | 0.10  | -0.28 | -0.21 | -0.28 | 0.21  | 0.29 |
| 30 | 16 | 0.00 | -0.04 | 0.00  | -0.01 | 0.00  | 0.01  | 0.02 |
| 30 | 17 | 0.00 | 0.09  | -0.02 | -0.11 | -0.02 | 0.11  | 0.11 |
| 30 | 18 | 0.00 | -0.09 | -0.01 | -0.05 | -0.01 | 0.05  | 0.07 |
| 30 | 19 | 0.00 | 0.33  | 0.65  | 0.89  | 0.65  | -0.89 | 0.92 |
| 30 | 20 | 0.00 | -0.03 | -0.04 | 0.07  | -0.04 | -0.07 | 0.07 |
| 30 | 21 | 0.00 | -0.09 | -0.01 | 0.17  | -0.01 | -0.17 | 0.15 |
| 30 | 22 | 0.00 | -0.17 | -0.17 | -0.70 | -0.17 | 0.70  | 0.60 |
| 30 | 23 | 0.00 | 0.26  | -0.83 | 0.52  | -0.83 | -0.52 | 0.81 |
| 30 | 24 | 0.00 | -1.44 | -0.73 | -0.85 | -0.73 | 0.85  | 1.24 |
| 30 | 25 | 0.00 | 0.49  | -0.90 | 1.37  | -0.90 | -1.37 | 1.37 |
| 30 | 26 | 0.00 | 0.48  | -0.03 | 0.02  | -0.03 | -0.02 | 0.28 |
| 30 | 27 | 0.00 | 0.34  | -0.05 | 0.03  | -0.05 | -0.03 | 0.20 |
| 30 | 28 | 0.00 | -0.02 | 0.22  | -0.02 | 0.22  | 0.02  | 0.18 |
| 30 | 29 | 0.00 | 0.53  | -0.67 | 0.12  | -0.67 | -0.12 | 0.63 |
| 30 | 30 | 0.00 | -0.74 | -0.01 | -0.95 | -0.01 | 0.95  | 0.89 |

**Table S8.** The TDMs of  $\text{Al}(\text{qBr}_2)_3$  calculated at the level of B3LYP/def2-SVP.

| State | $\mu_x/\text{a.u.}$ | $\mu_y/\text{a.u.}$ | $\mu_z/\text{a.u.}$ | u/debye  |
|-------|---------------------|---------------------|---------------------|----------|
| 1     | 0.24885             | -0.04039            | -0.05818            | 0.657686 |
| 2     | -0.45106            | -0.14359            | 0.09195             | 1.225761 |
| 3     | 0.54251             | 0.86805             | -0.1014             | 2.614803 |
| 4     | 0.54102             | -0.62572            | -0.20293            | 2.165032 |
| 5     | 0.2901              | 0.08761             | -0.12629            | 0.834535 |
| 6     | -0.59011            | -0.02159            | 0.08192             | 1.515446 |
| 7     | 0.25436             | 0.1119              | -0.05405            | 0.719615 |
| 8     | -0.07992            | -0.4879             | 0.00924             | 1.256993 |
| 9     | -0.0105             | -0.10381            | 0.03998             | 0.283977 |

|    |          |          |          |          |
|----|----------|----------|----------|----------|
| 10 | -0.08433 | 0.31731  | 0.12539  | 0.893396 |
| 11 | 0.25337  | -0.02345 | 0.29345  | 0.987331 |
| 12 | -0.17925 | 0.03949  | 0.18119  | 0.655619 |
| 13 | -0.30419 | 0.28998  | -0.22415 | 1.21075  |
| 14 | -0.07038 | 0.28847  | 0.17     | 0.869758 |
| 15 | 0.22521  | -0.04056 | 0.18344  | 0.745547 |
| 16 | 0.03098  | -0.01051 | 0.07225  | 0.201605 |
| 17 | 0.10791  | -0.0282  | 0.03407  | 0.296446 |
| 18 | -0.05949 | -0.10644 | 0.16363  | 0.518718 |
| 19 | 0.22404  | -0.11913 | 0.16976  | 0.776039 |
| 20 | 0.05721  | -0.22191 | 0.08251  | 0.619122 |
| 21 | 0.04738  | -0.10024 | -0.08141 | 0.349652 |
| 22 | 0.00288  | -0.01023 | 0.01346  | 0.043289 |
| 23 | 0.06034  | 0.00182  | 0.03203  | 0.173714 |
| 24 | 0.4392   | -0.11024 | 0.34161  | 1.441899 |
| 25 | 0.10105  | -0.0093  | 0.0612   | 0.301203 |
| 26 | -0.10312 | 0.07927  | -0.12421 | 0.457207 |
| 27 | -0.01582 | -0.01985 | -0.00757 | 0.067255 |
| 28 | 0.20958  | 0.09692  | 0.26794  | 0.899128 |
| 29 | -0.05317 | 0.02833  | -0.00399 | 0.153576 |
| 30 | -0.01978 | 0.021    | 0.01905  | 0.088057 |

**Table S9.** The SOCs of Al(qBr<sub>2</sub>)<sub>3</sub> calculated at the level of B3LYP/def2-SVP.

| Roots          |                | <T <sub>n</sub>  HSO S <sub>n</sub> > elements (Rm, Im) /cm <sup>-1</sup> |                   |                   |                    |                   |                   | SOC/cm <sup>-1</sup> |
|----------------|----------------|---------------------------------------------------------------------------|-------------------|-------------------|--------------------|-------------------|-------------------|----------------------|
| T <sub>n</sub> | S <sub>n</sub> | M <sub>s</sub> =0                                                         | M <sub>s</sub> =0 | M <sub>s</sub> =1 | M <sub>s</sub> =-1 | M <sub>s</sub> =1 | M <sub>s</sub> =1 |                      |
| 1              | 0              | 0.00                                                                      | 0.47              | -0.09             | 0.01               | -0.09             | -0.01             | 0.28                 |
| 1              | 1              | 0.00                                                                      | -1.97             | 0.71              | 0.3                | 0.71              | -0.3              | 1.30                 |
| 1              | 2              | 0.00                                                                      | -0.29             | 0.35              | -0.02              | 0.35              | 0.02              | 0.33                 |
| 1              | 3              | 0.00                                                                      | 0.51              | 0.43              | -0.56              | 0.43              | 0.56              | 0.65                 |
| 1              | 4              | 0.00                                                                      | -0.01             | 0.02              | -0.15              | 0.02              | 0.15              | 0.12                 |
| 1              | 5              | 0.00                                                                      | 0.58              | -0.1              | 0.25               | -0.1              | -0.25             | 0.40                 |
| 1              | 6              | 0.00                                                                      | -2.36             | -0.19             | 0.58               | -0.19             | -0.58             | 1.45                 |
| 1              | 7              | 0.00                                                                      | -4.82             | -0.82             | 1.79               | -0.82             | -1.79             | 3.21                 |
| 1              | 8              | 0.00                                                                      | -0.61             | -0.96             | 1.11               | -0.96             | -1.11             | 1.25                 |
| 1              | 9              | 0.00                                                                      | -0.91             | -1.32             | 1.48               | -1.32             | -1.48             | 1.70                 |
| 1              | 10             | 0.00                                                                      | 0.73              | -0.66             | 0.05               | -0.66             | -0.05             | 0.69                 |
| 1              | 11             | 0.00                                                                      | 0.14              | -0.04             | -0.21              | -0.04             | 0.21              | 0.19                 |
| 1              | 12             | 0.00                                                                      | 0.17              | 0.3               | -0.68              | 0.3               | 0.68              | 0.61                 |
| 1              | 13             | 0.00                                                                      | -0.13             | -0.09             | 0.08               | -0.09             | -0.08             | 0.12                 |
| 1              | 14             | 0.00                                                                      | -0.61             | 0.55              | 0.07               | 0.55              | -0.07             | 0.57                 |
| 1              | 15             | 0.00                                                                      | -0.21             | 0.1               | 0.24               | 0.1               | -0.24             | 0.24                 |

|   |    |      |        |        |        |        |         |        |
|---|----|------|--------|--------|--------|--------|---------|--------|
| 1 | 16 | 0.00 | -0.25  | 0.1    | 0.07   | 0.1    | -0.07   | 0.18   |
| 1 | 17 | 0.00 | -0.01  | -0.01  | 0      | -0.01  | 0       | 0.01   |
| 1 | 18 | 0.00 | 0.19   | 0.11   | -0.15  | 0.11   | 0.15    | 0.19   |
| 1 | 19 | 0.00 | -0.26  | -0.18  | 0.12   | -0.18  | -0.12   | 0.23   |
| 1 | 20 | 0.00 | 0.27   | -0.19  | -0.09  | -0.19  | 0.09    | 0.23   |
| 1 | 21 | 0.00 | 0.5    | -0.62  | 0.02   | -0.62  | -0.02   | 0.58   |
| 1 | 22 | 0.00 | -43.71 | 57.97  | -6.87  | 57.97  | 6.87    | 53.93  |
| 1 | 23 | 0.00 | 3.79   | -3.14  | 1.88   | -3.14  | -1.88   | 3.70   |
| 1 | 24 | 0.00 | 0.2    | 0.08   | 0.2    | 0.08   | -0.2    | 0.21   |
| 1 | 25 | 0.00 | -0.66  | -0.2   | -0.31  | -0.2   | 0.31    | 0.49   |
| 1 | 26 | 0.00 | -0.21  | -1.14  | 0.03   | -1.14  | -0.03   | 0.94   |
| 1 | 27 | 0.00 | -35.08 | 0.88   | 18.49  | 0.88   | -18.49  | 25.27  |
| 1 | 28 | 0.00 | -1.38  | -1.49  | -0.34  | -1.49  | 0.34    | 1.48   |
| 1 | 29 | 0.00 | 32.28  | -1.38  | -15.89 | -1.38  | 15.89   | 22.74  |
| 1 | 30 | 0.00 | -      | 5.09   | 143.64 | 5.09   | -143.64 | 195.25 |
|   |    |      | 270.27 |        |        |        |         |        |
| 2 | 0  | 0.00 | -0.18  | 0.93   | 0.51   | 0.93   | -0.51   | 0.87   |
| 2 | 1  | 0.00 | -2.72  | 1.09   | -1.24  | 1.09   | 1.24    | 2.07   |
| 2 | 2  | 0.00 | 7.22   | -0.01  | -0.26  | -0.01  | 0.26    | 4.17   |
| 2 | 3  | 0.00 | 1.09   | -0.26  | 0.36   | -0.26  | -0.36   | 0.73   |
| 2 | 4  | 0.00 | -1.51  | -0.35  | -0.03  | -0.35  | 0.03    | 0.92   |
| 2 | 5  | 0.00 | -0.05  | 0.25   | -0.51  | 0.25   | 0.51    | 0.46   |
| 2 | 6  | 0.00 | -2.4   | 0.14   | -0.13  | 0.14   | 0.13    | 1.39   |
| 2 | 7  | 0.00 | 1.02   | -0.02  | 0.02   | -0.02  | -0.02   | 0.59   |
| 2 | 8  | 0.00 | 1.99   | -0.01  | 0.3    | -0.01  | -0.3    | 1.17   |
| 2 | 9  | 0.00 | -0.22  | -0.14  | -0.43  | -0.14  | 0.43    | 0.39   |
| 2 | 10 | 0.00 | -0.23  | 0.15   | 0.03   | 0.15   | -0.03   | 0.18   |
| 2 | 11 | 0.00 | 0.4    | 0.14   | 0.09   | 0.14   | -0.09   | 0.27   |
| 2 | 12 | 0.00 | -0.69  | 0.07   | -0.15  | 0.07   | 0.15    | 0.42   |
| 2 | 13 | 0.00 | -1.1   | 0.01   | -0.5   | 0.01   | 0.5     | 0.76   |
| 2 | 14 | 0.00 | 0.12   | 0.11   | 0.14   | 0.11   | -0.14   | 0.16   |
| 2 | 15 | 0.00 | -0.67  | -0.05  | -0.26  | -0.05  | 0.26    | 0.44   |
| 2 | 16 | 0.00 | 1.53   | -1.25  | -0.19  | -1.25  | 0.19    | 1.36   |
| 2 | 17 | 0.00 | -0.79  | 0.45   | -0.63  | 0.45   | 0.63    | 0.78   |
| 2 | 18 | 0.00 | 0.46   | 0.47   | 0.46   | 0.47   | -0.46   | 0.60   |
| 2 | 19 | 0.00 | 0.29   | 0.71   | 0.54   | 0.71   | -0.54   | 0.75   |
| 2 | 20 | 0.00 | -1.88  | -0.38  | -0.87  | -0.38  | 0.87    | 1.33   |
| 2 | 21 | 0.00 | -0.38  | 0.38   | 0      | 0.38   | 0       | 0.38   |
| 2 | 22 | 0.00 | 0.39   | -0.27  | 0.24   | -0.27  | -0.24   | 0.37   |
| 2 | 23 | 0.00 | 1.44   | 0.61   | 2.2    | 0.61   | -2.2    | 2.04   |
| 2 | 24 | 0.00 | 4.66   | 13.27  | 10.66  | 13.27  | -10.66  | 14.16  |
| 2 | 25 | 0.00 | -42.58 | -38.95 | -44.83 | -38.95 | 44.83   | 54.37  |
| 2 | 26 | 0.00 | 1.13   | 0.09   | 0.53   | 0.09   | -0.53   | 0.79   |
| 2 | 27 | 0.00 | 7.15   | -2.75  | 8.27   | -2.75  | -8.27   | 8.23   |

|   |    |      |        |        |        |         |        |        |
|---|----|------|--------|--------|--------|---------|--------|--------|
| 2 | 28 | 0.00 | -25.9  | 8.5    | -6.73  | 8.5     | 6.73   | 17.38  |
| 2 | 29 | 0.00 | 279.7  | -      | 66.71  | -101.93 | -66.71 | 189.66 |
|   |    |      |        | 101.93 |        |         |        |        |
| 2 | 30 | 0.00 | 32.07  | -10.87 | 6.1    | -10.87  | -6.1   | 21.13  |
| 3 | 0  | 0.00 | -0.21  | -1     | 3.12   | -1      | -3.12  | 2.68   |
| 3 | 1  | 0.00 | 3.77   | 0.97   | -0.89  | 0.97    | 0.89   | 2.43   |
| 3 | 2  | 0.00 | 0.61   | 0.13   | -0.95  | 0.13    | 0.95   | 0.86   |
| 3 | 3  | 0.00 | 0.67   | 0.71   | -1.12  | 0.71    | 1.12   | 1.15   |
| 3 | 4  | 0.00 | 5.81   | 0.44   | -0.49  | 0.44    | 0.49   | 3.40   |
| 3 | 5  | 0.00 | -0.96  | -0.65  | 0.8    | -0.65   | -0.8   | 1.01   |
| 3 | 6  | 0.00 | 3.74   | 0.37   | -0.13  | 0.37    | 0.13   | 2.18   |
| 3 | 7  | 0.00 | -0.59  | -0.5   | 0.95   | -0.5    | -0.95  | 0.94   |
| 3 | 8  | 0.00 | -4.22  | -0.39  | 0.24   | -0.39   | -0.24  | 2.46   |
| 3 | 9  | 0.00 | 2.86   | 0.19   | -0.02  | 0.19    | 0.02   | 1.66   |
| 3 | 10 | 0.00 | 0.03   | -0.11  | -0.06  | -0.11   | 0.06   | 0.10   |
| 3 | 11 | 0.00 | 0.13   | 0.28   | 0.13   | 0.28    | -0.13  | 0.26   |
| 3 | 12 | 0.00 | -0.02  | -0.09  | 0.03   | -0.09   | -0.03  | 0.08   |
| 3 | 13 | 0.00 | -0.74  | -0.11  | -0.18  | -0.11   | 0.18   | 0.46   |
| 3 | 14 | 0.00 | 0.28   | 0.23   | -0.23  | 0.23    | 0.23   | 0.31   |
| 3 | 15 | 0.00 | -0.73  | -0.33  | 0.72   | -0.33   | -0.72  | 0.77   |
| 3 | 16 | 0.00 | -0.73  | -0.16  | 0.91   | -0.16   | -0.91  | 0.86   |
| 3 | 17 | 0.00 | -0.7   | -0.02  | -0.3   | -0.02   | 0.3    | 0.47   |
| 3 | 18 | 0.00 | 0.81   | 0.78   | -0.23  | 0.78    | 0.23   | 0.81   |
| 3 | 19 | 0.00 | 0.33   | -0.04  | -0.11  | -0.04   | 0.11   | 0.21   |
| 3 | 20 | 0.00 | -0.27  | 0.02   | -0.28  | 0.02    | 0.28   | 0.28   |
| 3 | 21 | 0.00 | -0.82  | -0.23  | 1.12   | -0.23   | -1.12  | 1.05   |
| 3 | 22 | 0.00 | -3.37  | 0.15   | -3.64  | 0.15    | 3.64   | 3.55   |
| 3 | 23 | 0.00 | -47.67 | -11.99 | -58.56 | -11.99  | 58.56  | 56.03  |
| 3 | 24 | 0.00 | 0.94   | 0.86   | 1.46   | 0.86    | -1.46  | 1.49   |
| 3 | 25 | 0.00 | -1.36  | -1.36  | -1.36  | -1.36   | 1.36   | 1.76   |
| 3 | 26 | 0.00 | -1.95  | -0.77  | -0.3   | -0.77   | 0.3    | 1.31   |
| 3 | 27 | 0.00 | -19.22 | 7.6    | 15.78  | 7.6     | -15.78 | 18.10  |
| 3 | 28 | 0.00 | -3.28  | -0.52  | -0.18  | -0.52   | 0.18   | 1.95   |
| 3 | 29 | 0.00 | 37.57  | 5.42   | -2.17  | 5.42    | 2.17   | 22.21  |
| 3 | 30 | 0.00 | 1.29   | -1.73  | -0.54  | -1.73   | 0.54   | 1.66   |
| 4 | 0  | 0.00 | -5.84  | 5.27   | 1.28   | 5.27    | -1.28  | 5.57   |
| 4 | 1  | 0.00 | 1.38   | 0.47   | -0.47  | 0.47    | 0.47   | 0.96   |
| 4 | 2  | 0.00 | -6.22  | -1.26  | 1.8    | -1.26   | -1.8   | 4.01   |
| 4 | 3  | 0.00 | 2.94   | -0.51  | 0.41   | -0.51   | -0.41  | 1.78   |
| 4 | 4  | 0.00 | 0.51   | 1.73   | -1.33  | 1.73    | 1.33   | 1.81   |
| 4 | 5  | 0.00 | -2.42  | -0.15  | -0.42  | -0.15   | 0.42   | 1.44   |
| 4 | 6  | 0.00 | 0.2    | 0.11   | -0.02  | 0.11    | 0.02   | 0.15   |
| 4 | 7  | 0.00 | -0.55  | -0.13  | 0.38   | -0.13   | -0.38  | 0.46   |
| 4 | 8  | 0.00 | -1.79  | -0.14  | 0.11   | -0.14   | -0.11  | 1.04   |



|   |    |      |        |        |        |        |        |        |
|---|----|------|--------|--------|--------|--------|--------|--------|
| 4 | 9  | 0.00 | 0.9    | -0.03  | 0.16   | -0.03  | -0.16  | 0.54   |
| 4 | 10 | 0.00 | -0.05  | -0.04  | -0.07  | -0.04  | 0.07   | 0.07   |
| 4 | 11 | 0.00 | -0.5   | -0.23  | -0.18  | -0.23  | 0.18   | 0.37   |
| 4 | 12 | 0.00 | -0.5   | 0.12   | -0.23  | 0.12   | 0.23   | 0.36   |
| 4 | 13 | 0.00 | 0.19   | 0.74   | 1.08   | 0.74   | -1.08  | 1.07   |
| 4 | 14 | 0.00 | 0.43   | -0.3   | 0.17   | -0.3   | -0.17  | 0.38   |
| 4 | 15 | 0.00 | -1.16  | -0.79  | 0.54   | -0.79  | -0.54  | 1.03   |
| 4 | 16 | 0.00 | 0.32   | 0.04   | -0.39  | 0.04   | 0.39   | 0.37   |
| 4 | 17 | 0.00 | -0.01  | 0.28   | 0.09   | 0.28   | -0.09  | 0.24   |
| 4 | 18 | 0.00 | 0.88   | 0.61   | -0.1   | 0.61   | 0.1    | 0.72   |
| 4 | 19 | 0.00 | 1.72   | 0.97   | -0.23  | 0.97   | 0.23   | 1.28   |
| 4 | 20 | 0.00 | -0.01  | 0.43   | 0.36   | 0.43   | -0.36  | 0.46   |
| 4 | 21 | 0.00 | -0.47  | 0.07   | 0.54   | 0.07   | -0.54  | 0.52   |
| 4 | 22 | 0.00 | -4.73  | 0.89   | -0.97  | 0.89   | 0.97   | 2.93   |
| 4 | 23 | 0.00 | -5.3   | -1.44  | -6.59  | -1.44  | 6.59   | 6.30   |
| 4 | 24 | 0.00 | 2.07   | 1.74   | 0.31   | 1.74   | -0.31  | 1.87   |
| 4 | 25 | 0.00 | 0.94   | 0.04   | -0.59  | 0.04   | 0.59   | 0.73   |
| 4 | 26 | 0.00 | -1.17  | -0.19  | 0.36   | -0.19  | -0.36  | 0.75   |
| 4 | 27 | 0.00 | 319.33 | -28.06 | -      | -28.06 | 158.92 | 226.61 |
|   |    |      |        |        | 158.92 |        |        |        |
| 4 | 28 | 0.00 | 0.51   | 1.06   | 0.29   | 1.06   | -0.29  | 0.94   |
| 4 | 29 | 0.00 | -20.76 | -2.2   | 9.54   | -2.2   | -9.54  | 14.41  |
| 4 | 30 | 0.00 | -34.42 | 3.03   | 16.51  | 3.03   | -16.51 | 24.14  |
| 5 | 0  | 0.00 | 2.27   | -0.01  | 0.23   | -0.01  | -0.23  | 1.32   |
| 5 | 1  | 0.00 | -4.01  | -1     | 1.82   | -1     | -1.82  | 2.87   |
| 5 | 2  | 0.00 | -1.59  | -0.16  | 0.11   | -0.16  | -0.11  | 0.93   |
| 5 | 3  | 0.00 | 3.41   | 0.3    | -0.66  | 0.3    | 0.66   | 2.06   |
| 5 | 4  | 0.00 | -6.31  | 0.64   | -0.43  | 0.64   | 0.43   | 3.70   |
| 5 | 5  | 0.00 | -4.4   | -0.24  | 0.4    | -0.24  | -0.4   | 2.57   |
| 5 | 6  | 0.00 | 1.19   | 0.49   | -0.92  | 0.49   | 0.92   | 1.09   |
| 5 | 7  | 0.00 | -1.92  | 0.13   | 0.92   | 0.13   | -0.92  | 1.34   |
| 5 | 8  | 0.00 | -4     | 0.78   | -0.79  | 0.78   | 0.79   | 2.48   |
| 5 | 9  | 0.00 | 2.21   | -0.49  | 0.54   | -0.49  | -0.54  | 1.41   |
| 5 | 10 | 0.00 | -0.04  | -0.12  | -0.1   | -0.12  | 0.1    | 0.13   |
| 5 | 11 | 0.00 | -0.13  | 0.25   | -0.14  | 0.25   | 0.14   | 0.25   |
| 5 | 12 | 0.00 | 0.24   | 0.13   | 0.02   | 0.13   | -0.02  | 0.18   |
| 5 | 13 | 0.00 | 2.08   | 0.02   | 0.57   | 0.02   | -0.57  | 1.29   |
| 5 | 14 | 0.00 | -0.72  | 0.25   | -0.14  | 0.25   | 0.14   | 0.48   |
| 5 | 15 | 0.00 | 0.32   | 0.46   | -0.28  | 0.46   | 0.28   | 0.48   |
| 5 | 16 | 0.00 | 1.55   | -0.21  | -1.42  | -0.21  | 1.42   | 1.47   |
| 5 | 17 | 0.00 | -0.22  | -0.14  | 0.1    | -0.14  | -0.1   | 0.19   |
| 5 | 18 | 0.00 | -0.69  | -0.35  | -0.13  | -0.35  | 0.13   | 0.50   |
| 5 | 19 | 0.00 | -2.86  | -1.07  | -0.01  | -1.07  | 0.01   | 1.87   |
| 5 | 20 | 0.00 | 0.51   | -0.04  | 0.18   | -0.04  | -0.18  | 0.33   |

|   |    |      |        |       |        |       |        |       |
|---|----|------|--------|-------|--------|-------|--------|-------|
| 5 | 21 | 0.00 | -0.72  | -0.16 | 0.78   | -0.16 | -0.78  | 0.77  |
| 5 | 22 | 0.00 | -0.79  | 0.82  | -1.54  | 0.82  | 1.54   | 1.50  |
| 5 | 23 | 0.00 | -11.51 | -2.27 | -11.88 | -2.27 | 11.88  | 11.90 |
| 5 | 24 | 0.00 | 0.95   | -0.83 | 0.91   | -0.83 | -0.91  | 1.15  |
| 5 | 25 | 0.00 | -0.57  | -0.32 | 0.54   | -0.32 | -0.54  | 0.61  |
| 5 | 26 | 0.00 | 0.48   | 0.22  | -0.22  | 0.22  | 0.22   | 0.38  |
| 5 | 27 | 0.00 | -      | 5.09  | 51.41  | 5.09  | -51.41 | 79.78 |
|   |    |      | 117.28 |       |        |       |        |       |
| 5 | 28 | 0.00 | 3.56   | 0.36  | 0.56   | 0.36  | -0.56  | 2.13  |
| 5 | 29 | 0.00 | -28.75 | -8.9  | -2.68  | -8.9  | 2.68   | 18.25 |
| 5 | 30 | 0.00 | 23.62  | -3.25 | -12.64 | -3.25 | 12.64  | 17.31 |
| 6 | 0  | 0.00 | -4.79  | -2.62 | 3.83   | -2.62 | -3.83  | 4.69  |
| 6 | 1  | 0.00 | 3.01   | 0.56  | -0.13  | 0.56  | 0.13   | 1.80  |
| 6 | 2  | 0.00 | 1.43   | 0.04  | 0.44   | 0.04  | -0.44  | 0.90  |
| 6 | 3  | 0.00 | -2.92  | -0.19 | 0.24   | -0.19 | -0.24  | 1.70  |
| 6 | 4  | 0.00 | 0.43   | -0.69 | 0.53   | -0.69 | -0.53  | 0.75  |
| 6 | 5  | 0.00 | 1.97   | 0.3   | -0.64  | 0.3   | 0.64   | 1.28  |
| 6 | 6  | 0.00 | 5.19   | 0.81  | -1.23  | 0.81  | 1.23   | 3.23  |
| 6 | 7  | 0.00 | -2.44  | -0.48 | 0.29   | -0.48 | -0.29  | 1.48  |
| 6 | 8  | 0.00 | 3.7    | 1.38  | -1.33  | 1.38  | 1.33   | 2.65  |
| 6 | 9  | 0.00 | -1.65  | -0.94 | 0.9    | -0.94 | -0.9   | 1.43  |
| 6 | 10 | 0.00 | 0.16   | -0.27 | -0.34  | -0.27 | 0.34   | 0.37  |
| 6 | 11 | 0.00 | 0.09   | 0.17  | -0.24  | 0.17  | 0.24   | 0.25  |
| 6 | 12 | 0.00 | -0.26  | 0.45  | -0.16  | 0.45  | 0.16   | 0.42  |
| 6 | 13 | 0.00 | -0.87  | 0.34  | 0.09   | 0.34  | -0.09  | 0.58  |
| 6 | 14 | 0.00 | 0.8    | 0.62  | -0.5   | 0.62  | 0.5    | 0.80  |
| 6 | 15 | 0.00 | 1.05   | 0.51  | -0.08  | 0.51  | 0.08   | 0.74  |
| 6 | 16 | 0.00 | -0.37  | 0.14  | 0.3    | 0.14  | -0.3   | 0.34  |
| 6 | 17 | 0.00 | 0.16   | 0.11  | -0.03  | 0.11  | 0.03   | 0.13  |
| 6 | 18 | 0.00 | 0.84   | 0.29  | -0.05  | 0.29  | 0.05   | 0.54  |
| 6 | 19 | 0.00 | 2.05   | 1.01  | -0.11  | 1.01  | 0.11   | 1.45  |
| 6 | 20 | 0.00 | -0.04  | 0.18  | -0.05  | 0.18  | 0.05   | 0.15  |
| 6 | 21 | 0.00 | 0.74   | -0.3  | -0.39  | -0.3  | 0.39   | 0.59  |
| 6 | 22 | 0.00 | -2.49  | 2.76  | -2.4   | 2.76  | 2.4    | 3.31  |
| 6 | 23 | 0.00 | 3.51   | 0.64  | 3.14   | 0.64  | -3.14  | 3.31  |
| 6 | 24 | 0.00 | 0.25   | -0.99 | -1.25  | -0.99 | 1.25   | 1.31  |
| 6 | 25 | 0.00 | 0.99   | 0.63  | 0.37   | 0.63  | -0.37  | 0.83  |
| 6 | 26 | 0.00 | -0.13  | 0.07  | 0.13   | 0.07  | -0.13  | 0.14  |
| 6 | 27 | 0.00 | -17.11 | 5.99  | 8.72   | 5.99  | -8.72  | 13.12 |
| 6 | 28 | 0.00 | -0.06  | 0     | -0.71  | 0     | 0.71   | 0.58  |
| 6 | 29 | 0.00 | 9.25   | 1.25  | 2.74   | 1.25  | -2.74  | 5.88  |
| 6 | 30 | 0.00 | 59.46  | -5.53 | -28.29 | -5.53 | 28.29  | 41.62 |
| 7 | 0  | 0.00 | 1.77   | -0.45 | 3.76   | -0.45 | -3.76  | 3.26  |
| 7 | 1  | 0.00 | 1.18   | -0.36 | 0.31   | -0.36 | -0.31  | 0.78  |

---

|   |    |      |        |        |        |        |       |       |
|---|----|------|--------|--------|--------|--------|-------|-------|
| 7 | 2  | 0.00 | -3.12  | -0.55  | 0.39   | -0.55  | -0.39 | 1.88  |
| 7 | 3  | 0.00 | 2.11   | -0.89  | 1.1    | -0.89  | -1.1  | 1.68  |
| 7 | 4  | 0.00 | -0.29  | -0.33  | -0.05  | -0.33  | 0.05  | 0.32  |
| 7 | 5  | 0.00 | -1.16  | 0.58   | -0.49  | 0.58   | 0.49  | 0.91  |
| 7 | 6  | 0.00 | -8.52  | -1.03  | 0.74   | -1.03  | -0.74 | 5.03  |
| 7 | 7  | 0.00 | 0.85   | 0.36   | -0.12  | 0.36   | 0.12  | 0.58  |
| 7 | 8  | 0.00 | -3.26  | -0.17  | -0.09  | -0.17  | 0.09  | 1.89  |
| 7 | 9  | 0.00 | -0.41  | 0.73   | -0.38  | 0.73   | 0.38  | 0.71  |
| 7 | 10 | 0.00 | -0.91  | 0.35   | -0.24  | 0.35   | 0.24  | 0.63  |
| 7 | 11 | 0.00 | 1.92   | 0.17   | 0.27   | 0.17   | -0.27 | 1.14  |
| 7 | 12 | 0.00 | -0.67  | 0.32   | 0.12   | 0.32   | -0.12 | 0.48  |
| 7 | 13 | 0.00 | -0.04  | 0.06   | -0.16  | 0.06   | 0.16  | 0.14  |
| 7 | 14 | 0.00 | -1.27  | 0.2    | 0.14   | 0.2    | -0.14 | 0.76  |
| 7 | 15 | 0.00 | 0.91   | 0.49   | 0.41   | 0.49   | -0.41 | 0.74  |
| 7 | 16 | 0.00 | -0.7   | 0.63   | 0.14   | 0.63   | -0.14 | 0.66  |
| 7 | 17 | 0.00 | -0.48  | -0.02  | 0.59   | -0.02  | -0.59 | 0.56  |
| 7 | 18 | 0.00 | 0.62   | -0.07  | -0.04  | -0.07  | 0.04  | 0.36  |
| 7 | 19 | 0.00 | 0.15   | 0.09   | 0.09   | 0.09   | -0.09 | 0.14  |
| 7 | 20 | 0.00 | -0.17  | -1.11  | 0.2    | -1.11  | -0.2  | 0.93  |
| 7 | 21 | 0.00 | -1.77  | 1.53   | 0.23   | 1.53   | -0.23 | 1.62  |
| 7 | 22 | 0.00 | 0.49   | -0.7   | 0.15   | -0.7   | -0.15 | 0.65  |
| 7 | 23 | 0.00 | -0.26  | -0.07  | 0.1    | -0.07  | -0.1  | 0.18  |
| 7 | 24 | 0.00 | 7.34   | 3.95   | 5.46   | 3.95   | -5.46 | 6.95  |
| 7 | 25 | 0.00 | -9.11  | -17.18 | -14.02 | -17.18 | 14.02 | 18.85 |
| 7 | 26 | 0.00 | -0.21  | 0.44   | 0.34   | 0.44   | -0.34 | 0.47  |
| 7 | 27 | 0.00 | -6.18  | 0.4    | -0.45  | 0.4    | 0.45  | 3.60  |
| 7 | 28 | 0.00 | 3.69   | -1.23  | 1.02   | -1.23  | -1.02 | 2.50  |
| 7 | 29 | 0.00 | -52.18 | 16.5   | -14.18 | 16.5   | 14.18 | 34.97 |
| 7 | 30 | 0.00 | -4.52  | 2.79   | -0.6   | 2.79   | 0.6   | 3.50  |
| 8 | 0  | 0.00 | -1.89  | -1.12  | 6.66   | -1.12  | -6.66 | 5.62  |
| 8 | 1  | 0.00 | 0.37   | -0.05  | -0.07  | -0.05  | 0.07  | 0.22  |
| 8 | 2  | 0.00 | -1.35  | 0.52   | 0.23   | 0.52   | -0.23 | 0.91  |
| 8 | 3  | 0.00 | 3.9    | 0.69   | -1.31  | 0.69   | 1.31  | 2.56  |
| 8 | 4  | 0.00 | 0.07   | -0.1   | 0.3    | -0.1   | -0.3  | 0.26  |
| 8 | 5  | 0.00 | 4.26   | 0.52   | -1.14  | 0.52   | 1.14  | 2.66  |
| 8 | 6  | 0.00 | 2.59   | 0.56   | -1.15  | 0.56   | 1.15  | 1.82  |
| 8 | 7  | 0.00 | 0.71   | -0.04  | -0.04  | -0.04  | 0.04  | 0.41  |
| 8 | 8  | 0.00 | -3.53  | 0.18   | -0.06  | 0.18   | 0.06  | 2.04  |
| 8 | 9  | 0.00 | -7.34  | -0.09  | 0.26   | -0.09  | -0.26 | 4.24  |
| 8 | 10 | 0.00 | -0.14  | 0.29   | 0.06   | 0.29   | -0.06 | 0.25  |
| 8 | 11 | 0.00 | -0.22  | -0.62  | 0.69   | -0.62  | -0.69 | 0.77  |
| 8 | 12 | 0.00 | -1.04  | 0.19   | 0.75   | 0.19   | -0.75 | 0.87  |
| 8 | 13 | 0.00 | -0.23  | 0.01   | 0.06   | 0.01   | -0.06 | 0.14  |
| 8 | 14 | 0.00 | -0.55  | 0.57   | 0.28   | 0.57   | -0.28 | 0.61  |

---

---

|   |    |      |        |       |       |       |       |       |
|---|----|------|--------|-------|-------|-------|-------|-------|
| 8 | 15 | 0.00 | -0.36  | -0.09 | 0.93  | -0.09 | -0.93 | 0.79  |
| 8 | 16 | 0.00 | -0.06  | -0.05 | 0.1   | -0.05 | -0.1  | 0.10  |
| 8 | 17 | 0.00 | 0.66   | 0.02  | 0.02  | 0.02  | -0.02 | 0.38  |
| 8 | 18 | 0.00 | 0.54   | -0.33 | -0.04 | -0.33 | 0.04  | 0.41  |
| 8 | 19 | 0.00 | -0.46  | 0.04  | 0.48  | 0.04  | -0.48 | 0.47  |
| 8 | 20 | 0.00 | 0.25   | 0.22  | -0.15 | 0.22  | 0.15  | 0.26  |
| 8 | 21 | 0.00 | 0.26   | -0.24 | -0.08 | -0.24 | 0.08  | 0.26  |
| 8 | 22 | 0.00 | -1.39  | 2.57  | -0.3  | 2.57  | 0.3   | 2.26  |
| 8 | 23 | 0.00 | 1.51   | -1.77 | 5.28  | -1.77 | -5.28 | 4.63  |
| 8 | 24 | 0.00 | -1.46  | -0.42 | -0.94 | -0.42 | 0.94  | 1.19  |
| 8 | 25 | 0.00 | 0.66   | 1.88  | 1.12  | 1.88  | -1.12 | 1.83  |
| 8 | 26 | 0.00 | -3.61  | -1.54 | 0.61  | -1.54 | -0.61 | 2.48  |
| 8 | 27 | 0.00 | 1.26   | -0.03 | 0.23  | -0.03 | -0.23 | 0.75  |
| 8 | 28 | 0.00 | -0.55  | 0.21  | 0.92  | 0.21  | -0.92 | 0.83  |
| 8 | 29 | 0.00 | 12.17  | -1.94 | 1.7   | -1.94 | -1.7  | 7.34  |
| 8 | 30 | 0.00 | -14.46 | -3.04 | 7.59  | -3.04 | -7.59 | 10.69 |
| 9 | 0  | 0.00 | 6.38   | -4.65 | 0.21  | -4.65 | -0.21 | 5.29  |
| 9 | 1  | 0.00 | 0.39   | -0.09 | 0.1   | -0.09 | -0.1  | 0.25  |
| 9 | 2  | 0.00 | -1.46  | -0.36 | 0.43  | -0.36 | -0.43 | 0.96  |
| 9 | 3  | 0.00 | 1.49   | 1.04  | -1.53 | 1.04  | 1.53  | 1.74  |
| 9 | 4  | 0.00 | 1.14   | -0.55 | 0     | -0.55 | 0     | 0.80  |
| 9 | 5  | 0.00 | 0.61   | 0.88  | -1.73 | 0.88  | 1.73  | 1.62  |
| 9 | 6  | 0.00 | 0.68   | -0.27 | -0.2  | -0.27 | 0.2   | 0.48  |
| 9 | 7  | 0.00 | 8.73   | 0.26  | -0.61 | 0.26  | 0.61  | 5.07  |
| 9 | 8  | 0.00 | -0.96  | 0.19  | -0.73 | 0.19  | 0.73  | 0.83  |
| 9 | 9  | 0.00 | 0      | 0.08  | 0.09  | 0.08  | -0.09 | 0.10  |
| 9 | 10 | 0.00 | 0.49   | -0.28 | -0.07 | -0.28 | 0.07  | 0.37  |
| 9 | 11 | 0.00 | 0.12   | -0.28 | 0.05  | -0.28 | -0.05 | 0.24  |
| 9 | 12 | 0.00 | 0.93   | -0.36 | -0.07 | -0.36 | 0.07  | 0.61  |
| 9 | 13 | 0.00 | 0.93   | -0.95 | 0.04  | -0.95 | -0.04 | 0.94  |
| 9 | 14 | 0.00 | 1.09   | -0.67 | -0.39 | -0.67 | 0.39  | 0.89  |
| 9 | 15 | 0.00 | 0.68   | 0.13  | 0.08  | 0.13  | -0.08 | 0.41  |
| 9 | 16 | 0.00 | -0.35  | 0.25  | 0.04  | 0.25  | -0.04 | 0.29  |
| 9 | 17 | 0.00 | 0.21   | 0.13  | -0.88 | 0.13  | 0.88  | 0.74  |
| 9 | 18 | 0.00 | 0.61   | 0.39  | -0.27 | 0.39  | 0.27  | 0.52  |
| 9 | 19 | 0.00 | -0.16  | -0.25 | 0.22  | -0.25 | -0.22 | 0.29  |
| 9 | 20 | 0.00 | 0.02   | -0.04 | -0.1  | -0.04 | 0.1   | 0.09  |
| 9 | 21 | 0.00 | -0.57  | 0.4   | 0.15  | 0.4   | -0.15 | 0.48  |
| 9 | 22 | 0.00 | -2.95  | 11.54 | -4.65 | 11.54 | 4.65  | 10.30 |
| 9 | 23 | 0.00 | 0.06   | -0.86 | 0.73  | -0.86 | -0.73 | 0.92  |
| 9 | 24 | 0.00 | 0.66   | -0.32 | -0.43 | -0.32 | 0.43  | 0.58  |
| 9 | 25 | 0.00 | -0.4   | 1.37  | 2.73  | 1.37  | -2.73 | 2.50  |
| 9 | 26 | 0.00 | -1.37  | -0.77 | -0.63 | -0.77 | 0.63  | 1.13  |
| 9 | 27 | 0.00 | -0.53  | -0.32 | -1.64 | -0.32 | 1.64  | 1.40  |

---

---

|    |    |      |       |        |       |        |        |       |
|----|----|------|-------|--------|-------|--------|--------|-------|
| 9  | 28 | 0.00 | 6.52  | -1.75  | 1.96  | -1.75  | -1.96  | 4.33  |
| 9  | 29 | 0.00 | -35   | 9.21   | -10.4 | 9.21   | 10.4   | 23.17 |
| 9  | 30 | 0.00 | -5.76 | -0.97  | -2.09 | -0.97  | 2.09   | 3.82  |
| 10 | 0  | 0.00 | 2.51  | -1.44  | 1.58  | -1.44  | -1.58  | 2.27  |
| 10 | 1  | 0.00 | 0.27  | -0.42  | 0.17  | -0.42  | -0.17  | 0.40  |
| 10 | 2  | 0.00 | -0.18 | -0.2   | 0.16  | -0.2   | -0.16  | 0.23  |
| 10 | 3  | 0.00 | 0.25  | -0.32  | -0.02 | -0.32  | 0.02   | 0.30  |
| 10 | 4  | 0.00 | 0     | -0.47  | 0.26  | -0.47  | -0.26  | 0.44  |
| 10 | 5  | 0.00 | 0.58  | 0.79   | -0.82 | 0.79   | 0.82   | 0.99  |
| 10 | 6  | 0.00 | 0.55  | -0.18  | -0.06 | -0.18  | 0.06   | 0.35  |
| 10 | 7  | 0.00 | 1.49  | 0.1    | -0.2  | 0.1    | 0.2    | 0.88  |
| 10 | 8  | 0.00 | -0.34 | 0.06   | -0.05 | 0.06   | 0.05   | 0.21  |
| 10 | 9  | 0.00 | -0.49 | -0.05  | 0.27  | -0.05  | -0.27  | 0.36  |
| 10 | 10 | 0.00 | -0.48 | 0.2    | 0.04  | 0.2    | -0.04  | 0.32  |
| 10 | 11 | 0.00 | 1.44  | 0.18   | -0.41 | 0.18   | 0.41   | 0.91  |
| 10 | 12 | 0.00 | -1.01 | -0.3   | 0.34  | -0.3   | -0.34  | 0.69  |
| 10 | 13 | 0.00 | 0.55  | 0.18   | -0.44 | 0.18   | 0.44   | 0.50  |
| 10 | 14 | 0.00 | -0.27 | -0.57  | 0.36  | -0.57  | -0.36  | 0.57  |
| 10 | 15 | 0.00 | -0.49 | -0.18  | 0.36  | -0.18  | -0.36  | 0.43  |
| 10 | 16 | 0.00 | -0.25 | 0.1    | 0.03  | 0.1    | -0.03  | 0.17  |
| 10 | 17 | 0.00 | 0.03  | 0.12   | -0.26 | 0.12   | 0.26   | 0.23  |
| 10 | 18 | 0.00 | -4.52 | -0.77  | 1.69  | -0.77  | -1.69  | 3.02  |
| 10 | 19 | 0.00 | 2.18  | 0.35   | -0.77 | 0.35   | 0.77   | 1.44  |
| 10 | 20 | 0.00 | -1.5  | -1.36  | 1.72  | -1.36  | -1.72  | 1.99  |
| 10 | 21 | 0.00 | -0.34 | 0.65   | -0.23 | 0.65   | 0.23   | 0.60  |
| 10 | 22 | 0.00 | 5.64  | -51    | 23.91 | -51    | -23.91 | 46.11 |
| 10 | 23 | 0.00 | 0.2   | 3.09   | -0.17 | 3.09   | 0.17   | 2.53  |
| 10 | 24 | 0.00 | -0.07 | 0.41   | -0.18 | 0.41   | 0.18   | 0.37  |
| 10 | 25 | 0.00 | -0.1  | -0.94  | -0.24 | -0.94  | 0.24   | 0.79  |
| 10 | 26 | 0.00 | -0.76 | -0.16  | 0.13  | -0.16  | -0.13  | 0.47  |
| 10 | 27 | 0.00 | -3.89 | -0.54  | 2.02  | -0.54  | -2.02  | 2.82  |
| 10 | 28 | 0.00 | 1.62  | -0.65  | 0.24  | -0.65  | -0.24  | 1.09  |
| 10 | 29 | 0.00 | -7.76 | 2.91   | -0.83 | 2.91   | 0.83   | 5.12  |
| 10 | 30 | 0.00 | 26.06 | -12.78 | -8.32 | -12.78 | 8.32   | 19.53 |
| 11 | 0  | 0.00 | -3.46 | -2.57  | -0.75 | -2.57  | 0.75   | 2.96  |
| 11 | 1  | 0.00 | 0.2   | -0.11  | -0.24 | -0.11  | 0.24   | 0.24  |
| 11 | 2  | 0.00 | 0.17  | -0.31  | 0.08  | -0.31  | -0.08  | 0.28  |
| 11 | 3  | 0.00 | 0.37  | -0.21  | 0.38  | -0.21  | -0.38  | 0.41  |
| 11 | 4  | 0.00 | 0.11  | -0.18  | 0.12  | -0.18  | -0.12  | 0.19  |
| 11 | 5  | 0.00 | -0.29 | 0.05   | -0.06 | 0.05   | 0.06   | 0.18  |
| 11 | 6  | 0.00 | -2.65 | -0.31  | 0.2   | -0.31  | -0.2   | 1.56  |
| 11 | 7  | 0.00 | 0.09  | 0.21   | 0.02  | 0.21   | -0.02  | 0.18  |
| 11 | 8  | 0.00 | -0.09 | -0.14  | 0.21  | -0.14  | -0.21  | 0.21  |
| 11 | 9  | 0.00 | 0.61  | -0.81  | -0.43 | -0.81  | 0.43   | 0.83  |

---

---

|    |    |      |        |        |        |        |        |       |
|----|----|------|--------|--------|--------|--------|--------|-------|
| 11 | 10 | 0.00 | 2.5    | -1.18  | 1.14   | -1.18  | -1.14  | 1.97  |
| 11 | 11 | 0.00 | -6.27  | 0.15   | 0.06   | 0.15   | -0.06  | 3.62  |
| 11 | 12 | 0.00 | 3.02   | -0.06  | 0.07   | -0.06  | -0.07  | 1.75  |
| 11 | 13 | 0.00 | -1.93  | 0.3    | -0.08  | 0.3    | 0.08   | 1.14  |
| 11 | 14 | 0.00 | 0.38   | 0.35   | -0.26  | 0.35   | 0.26   | 0.42  |
| 11 | 15 | 0.00 | 1.88   | 0.07   | -0.04  | 0.07   | 0.04   | 1.09  |
| 11 | 16 | 0.00 | -0.05  | 0.04   | 0.06   | 0.04   | -0.06  | 0.07  |
| 11 | 17 | 0.00 | 0.24   | -0.3   | -0.04  | -0.3   | 0.04   | 0.28  |
| 11 | 18 | 0.00 | -0.92  | -0.12  | -0.04  | -0.12  | 0.04   | 0.54  |
| 11 | 19 | 0.00 | 1.08   | 0.04   | 0.17   | 0.04   | -0.17  | 0.64  |
| 11 | 20 | 0.00 | -0.08  | 0.74   | 0.58   | 0.74   | -0.58  | 0.77  |
| 11 | 21 | 0.00 | -0.44  | 0.39   | 0.05   | 0.39   | -0.05  | 0.41  |
| 11 | 22 | 0.00 | 0.36   | -1.62  | 0.68   | -1.62  | -0.68  | 1.45  |
| 11 | 23 | 0.00 | 0.07   | 0.08   | 0.61   | 0.08   | -0.61  | 0.50  |
| 11 | 24 | 0.00 | 2.86   | -13.03 | -6.51  | -13.03 | 6.51   | 12.01 |
| 11 | 25 | 0.00 | -0.33  | 46.09  | 26.93  | 46.09  | -26.93 | 43.59 |
| 11 | 26 | 0.00 | -0.02  | -0.31  | -0.25  | -0.31  | 0.25   | 0.33  |
| 11 | 27 | 0.00 | -3.07  | -0.09  | -0.51  | -0.09  | 0.51   | 1.82  |
| 11 | 28 | 0.00 | 4.27   | 0.51   | 2.23   | 0.51   | -2.23  | 3.09  |
| 11 | 29 | 0.00 | -48.22 | 2.12   | -20.32 | 2.12   | 20.32  | 32.45 |
| 11 | 30 | 0.00 | -4.84  | 0.58   | -1.91  | 0.58   | 1.91   | 3.23  |
| 12 | 0  | 0.00 | -2.26  | 1.12   | -1.68  | 1.12   | 1.68   | 2.10  |
| 12 | 1  | 0.00 | -0.15  | -0.15  | 0.35   | -0.15  | -0.35  | 0.32  |
| 12 | 2  | 0.00 | -0.2   | 0.15   | -0.6   | 0.15   | 0.6    | 0.52  |
| 12 | 3  | 0.00 | -0.47  | -0.19  | 0.38   | -0.19  | -0.38  | 0.44  |
| 12 | 4  | 0.00 | -0.19  | 0.12   | -0.04  | 0.12   | 0.04   | 0.15  |
| 12 | 5  | 0.00 | -0.35  | -0.06  | 0.35   | -0.06  | -0.35  | 0.35  |
| 12 | 6  | 0.00 | 0.41   | 0.2    | -0.41  | 0.2    | 0.41   | 0.44  |
| 12 | 7  | 0.00 | -0.38  | 0.29   | -1.28  | 0.29   | 1.28   | 1.09  |
| 12 | 8  | 0.00 | -0.32  | -0.1   | -0.01  | -0.1   | 0.01   | 0.20  |
| 12 | 9  | 0.00 | 1      | 0.09   | -0.2   | 0.09   | 0.2    | 0.60  |
| 12 | 10 | 0.00 | 1.48   | 0.34   | -0.63  | 0.34   | 0.63   | 1.04  |
| 12 | 11 | 0.00 | -0.78  | -0.23  | 0.62   | -0.23  | -0.62  | 0.70  |
| 12 | 12 | 0.00 | -4.61  | -1.28  | 1.28   | -1.28  | -1.28  | 3.04  |
| 12 | 13 | 0.00 | -0.41  | 0.22   | -0.27  | 0.22   | 0.27   | 0.37  |
| 12 | 14 | 0.00 | 1.52   | 0.3    | -0.4   | 0.3    | 0.4    | 0.97  |
| 12 | 15 | 0.00 | 2.96   | 0.72   | -1.21  | 0.72   | 1.21   | 2.06  |
| 12 | 16 | 0.00 | 0.25   | -0.12  | -0.04  | -0.12  | 0.04   | 0.18  |
| 12 | 17 | 0.00 | 7.62   | 0.62   | -0.13  | 0.62   | 0.13   | 4.43  |
| 12 | 18 | 0.00 | -0.88  | -0.13  | -0.23  | -0.13  | 0.23   | 0.55  |
| 12 | 19 | 0.00 | -0.39  | -0.11  | -0.05  | -0.11  | 0.05   | 0.25  |
| 12 | 20 | 0.00 | 0.54   | 0.04   | -0.05  | 0.04   | 0.05   | 0.32  |
| 12 | 21 | 0.00 | -0.23  | -0.21  | 0.05   | -0.21  | -0.05  | 0.22  |
| 12 | 22 | 0.00 | 0.72   | -0.21  | 3.16   | -0.21  | -3.16  | 2.62  |

---

|    |    |      |        |        |        |        |         |        |
|----|----|------|--------|--------|--------|--------|---------|--------|
| 12 | 23 | 0.00 | 3.86   | -8.63  | 58.26  | -8.63  | -58.26  | 48.14  |
| 12 | 24 | 0.00 | -0.56  | 0.42   | -2.53  | 0.42   | 2.53    | 2.12   |
| 12 | 25 | 0.00 | -0.2   | -0.49  | -1.11  | -0.49  | 1.11    | 1.00   |
| 12 | 26 | 0.00 | 0.54   | 0.17   | 0.55   | 0.17   | -0.55   | 0.56   |
| 12 | 27 | 0.00 | -2.52  | -0.61  | -0.37  | -0.61  | 0.37    | 1.57   |
| 12 | 28 | 0.00 | 0.35   | 0.17   | -0.24  | 0.17   | 0.24    | 0.31   |
| 12 | 29 | 0.00 | -4.07  | -1.47  | -0.74  | -1.47  | 0.74    | 2.71   |
| 12 | 30 | 0.00 | 0.36   | 0.61   | -0.09  | 0.61   | 0.09    | 0.54   |
| 13 | 0  | 0.00 | 0.48   | -0.49  | 0.59   | -0.49  | -0.59   | 0.68   |
| 13 | 1  | 0.00 | -0.14  | -0.1   | -0.02  | -0.1   | 0.02    | 0.12   |
| 13 | 2  | 0.00 | 0.02   | -0.01  | -0.03  | -0.01  | 0.03    | 0.03   |
| 13 | 3  | 0.00 | 0.4    | 0.15   | -0.37  | 0.15   | 0.37    | 0.40   |
| 13 | 4  | 0.00 | 0.04   | -0.14  | 0.02   | -0.14  | -0.02   | 0.12   |
| 13 | 5  | 0.00 | 0.54   | -0.12  | -0.34  | -0.12  | 0.34    | 0.43   |
| 13 | 6  | 0.00 | -1.08  | 0.48   | 0.47   | 0.48   | -0.47   | 0.83   |
| 13 | 7  | 0.00 | -2.13  | 0.43   | 1.21   | 0.43   | -1.21   | 1.62   |
| 13 | 8  | 0.00 | 0.16   | -0.8   | 0.17   | -0.8   | -0.17   | 0.67   |
| 13 | 9  | 0.00 | 0.18   | -1.04  | 0.28   | -1.04  | -0.28   | 0.89   |
| 13 | 10 | 0.00 | -0.06  | -0.06  | 0.01   | -0.06  | -0.01   | 0.06   |
| 13 | 11 | 0.00 | 0.45   | 0.07   | -0.17  | 0.07   | 0.17    | 0.30   |
| 13 | 12 | 0.00 | -0.18  | -0.01  | -0.05  | -0.01  | 0.05    | 0.11   |
| 13 | 13 | 0.00 | 0.15   | 0.02   | -0.09  | 0.02   | 0.09    | 0.11   |
| 13 | 14 | 0.00 | -0.11  | 0.02   | 0.08   | 0.02   | -0.08   | 0.09   |
| 13 | 15 | 0.00 | -0.24  | -0.04  | 0.12   | -0.04  | -0.12   | 0.17   |
| 13 | 16 | 0.00 | 1.36   | -0.65  | -0.01  | -0.65  | 0.01    | 0.95   |
| 13 | 17 | 0.00 | 0.01   | 0.04   | -0.04  | 0.04   | 0.04    | 0.05   |
| 13 | 18 | 0.00 | -0.19  | -0.02  | 0.15   | -0.02  | -0.15   | 0.17   |
| 13 | 19 | 0.00 | 0.65   | 0.03   | -0.14  | 0.03   | 0.14    | 0.39   |
| 13 | 20 | 0.00 | -0.18  | -0.13  | 0.17   | -0.13  | -0.17   | 0.20   |
| 13 | 21 | 0.00 | 0.17   | -0.2   | 0.52   | -0.2   | -0.52   | 0.47   |
| 13 | 22 | 0.00 | -0.49  | 1.26   | -0.34  | 1.26   | 0.34    | 1.10   |
| 13 | 23 | 0.00 | 0.12   | -0.01  | 0.05   | -0.01  | -0.05   | 0.08   |
| 13 | 24 | 0.00 | 1.33   | -0.22  | 0.16   | -0.22  | -0.16   | 0.80   |
| 13 | 25 | 0.00 | 0.04   | -0.04  | 0.2    | -0.04  | -0.2    | 0.17   |
| 13 | 26 | 0.00 | 4.48   | -0.83  | -1.95  | -0.83  | 1.95    | 3.11   |
| 13 | 27 | 0.00 | -67.73 | 15.44  | 27.41  | 15.44  | -27.41  | 46.79  |
| 13 | 28 | 0.00 | -1.12  | 0.93   | 2      | 0.93   | -2      | 1.91   |
| 13 | 29 | 0.00 | 22.18  | -7.3   | -35.07 | -7.3   | 35.07   | 31.93  |
| 13 | 30 | 0.00 | -      | 113.01 | 201.11 | 113.01 | -201.11 | 339.36 |
|    |    |      | 488.93 |        |        |        |         |        |
| 14 | 0  | 0.00 | 0.45   | 1.35   | 1.16   | 1.35   | -1.16   | 1.48   |
| 14 | 1  | 0.00 | -0.87  | 1.24   | 1.26   | 1.24   | -1.26   | 1.53   |
| 14 | 2  | 0.00 | -0.45  | -0.06  | -0.11  | -0.06  | 0.11    | 0.28   |
| 14 | 3  | 0.00 | -0.05  | -0.27  | -0.34  | -0.27  | 0.34    | 0.36   |

---

|    |    |      |        |        |        |        |         |        |
|----|----|------|--------|--------|--------|--------|---------|--------|
| 14 | 4  | 0.00 | 0.75   | -0.25  | 0.14   | -0.25  | -0.14   | 0.49   |
| 14 | 5  | 0.00 | 0.18   | 0.38   | 0.31   | 0.38   | -0.31   | 0.41   |
| 14 | 6  | 0.00 | -0.38  | -0.01  | 0.13   | -0.01  | -0.13   | 0.24   |
| 14 | 7  | 0.00 | 0.03   | 0.09   | 0.07   | 0.09   | -0.07   | 0.09   |
| 14 | 8  | 0.00 | 0.44   | -0.16  | 0.03   | -0.16  | -0.03   | 0.29   |
| 14 | 9  | 0.00 | -0.02  | -0.1   | 0      | -0.1   | 0       | 0.08   |
| 14 | 10 | 0.00 | 0.51   | -0.15  | 0      | -0.15  | 0       | 0.32   |
| 14 | 11 | 0.00 | -0.37  | 0.07   | 0.1    | 0.07   | -0.1    | 0.24   |
| 14 | 12 | 0.00 | 0.4    | 0.2    | 0.08   | 0.2    | -0.08   | 0.29   |
| 14 | 13 | 0.00 | -0.9   | 0.34   | -0.08  | 0.34   | 0.08    | 0.59   |
| 14 | 14 | 0.00 | -0.11  | 0      | 0.08   | 0      | -0.08   | 0.09   |
| 14 | 15 | 0.00 | 0.87   | 0.17   | 0.22   | 0.17   | -0.22   | 0.55   |
| 14 | 16 | 0.00 | -0.05  | 0.09   | -0.36  | 0.09   | 0.36    | 0.30   |
| 14 | 17 | 0.00 | -0.74  | 0.13   | -0.26  | 0.13   | 0.26    | 0.49   |
| 14 | 18 | 0.00 | -1.52  | 0.02   | -0.27  | 0.02   | 0.27    | 0.90   |
| 14 | 19 | 0.00 | -2.93  | 0.05   | -0.7   | 0.05   | 0.7     | 1.79   |
| 14 | 20 | 0.00 | -1.32  | 0.34   | -0.29  | 0.34   | 0.29    | 0.84   |
| 14 | 21 | 0.00 | -0.48  | -0.08  | 0.07   | -0.08  | -0.07   | 0.29   |
| 14 | 22 | 0.00 | -0.43  | 0.02   | -0.09  | 0.02   | 0.09    | 0.26   |
| 14 | 23 | 0.00 | -0.63  | 0.12   | -0.33  | 0.12   | 0.33    | 0.46   |
| 14 | 24 | 0.00 | -13.5  | 1.66   | -4.54  | 1.66   | 4.54    | 8.74   |
| 14 | 25 | 0.00 | -2.32  | 0.7    | -0.64  | 0.7    | 0.64    | 1.55   |
| 14 | 26 | 0.00 | 1.67   | -0.14  | 0.26   | -0.14  | -0.26   | 0.99   |
| 14 | 27 | 0.00 | 32.33  | -6.18  | 0.16   | -6.18  | -0.16   | 19.34  |
| 14 | 28 | 0.00 | -42.2  | 6.45   | -15.64 | 6.45   | 15.64   | 28.01  |
| 14 | 29 | 0.00 | 482.04 | -73.07 | 173.22 | -73.07 | -173.22 | 317.83 |
| 14 | 30 | 0.00 | 17.21  | 0.47   | 33.25  | 0.47   | -33.25  | 28.91  |
| 15 | 0  | 0.00 | 1.86   | 0.86   | 6.08   | 0.86   | -6.08   | 5.13   |
| 15 | 1  | 0.00 | 1.65   | 0.83   | 0.02   | 0.83   | -0.02   | 1.17   |
| 15 | 2  | 0.00 | 0.54   | 0.31   | -0.18  | 0.31   | 0.18    | 0.43   |
| 15 | 3  | 0.00 | 1.48   | 0.57   | 0.13   | 0.57   | -0.13   | 0.98   |
| 15 | 4  | 0.00 | 1.14   | 0.32   | -0.42  | 0.32   | 0.42    | 0.79   |
| 15 | 5  | 0.00 | -1.56  | -0.63  | 0.02   | -0.63  | -0.02   | 1.04   |
| 15 | 6  | 0.00 | 0.57   | 0.14   | -0.28  | 0.14   | 0.28    | 0.42   |
| 15 | 7  | 0.00 | -0.03  | -0.02  | 0.16   | -0.02  | -0.16   | 0.13   |
| 15 | 8  | 0.00 | -0.48  | 0.06   | 0.39   | 0.06   | -0.39   | 0.42   |
| 15 | 9  | 0.00 | 0.46   | -0.04  | -0.23  | -0.04  | 0.23    | 0.33   |
| 15 | 10 | 0.00 | 0.16   | 0.01   | -0.1   | 0.01   | 0.1     | 0.12   |
| 15 | 11 | 0.00 | -0.25  | -0.04  | 0.17   | -0.04  | -0.17   | 0.20   |
| 15 | 12 | 0.00 | -0.78  | -0.27  | 0.36   | -0.27  | -0.36   | 0.58   |
| 15 | 13 | 0.00 | 0.47   | 0.11   | 0.15   | 0.11   | -0.15   | 0.31   |
| 15 | 14 | 0.00 | 0.28   | 0.11   | -0.25  | 0.11   | 0.25    | 0.28   |
| 15 | 15 | 0.00 | -0.4   | -0.26  | 0.28   | -0.26  | -0.28   | 0.39   |
| 15 | 16 | 0.00 | 1.12   | 0.46   | -0.11  | 0.46   | 0.11    | 0.75   |

---



---

|    |    |      |       |       |       |       |        |       |
|----|----|------|-------|-------|-------|-------|--------|-------|
| 15 | 17 | 0.00 | 1.19  | 0.1   | 0.04  | 0.1   | -0.04  | 0.69  |
| 15 | 18 | 0.00 | 1.4   | 0.44  | 0.04  | 0.44  | -0.04  | 0.89  |
| 15 | 19 | 0.00 | 3     | 0.73  | 0.35  | 0.73  | -0.35  | 1.85  |
| 15 | 20 | 0.00 | 0.19  | 0.05  | 0.06  | 0.05  | -0.06  | 0.13  |
| 15 | 21 | 0.00 | 1.75  | 0.8   | 0.17  | 0.8   | -0.17  | 1.21  |
| 15 | 22 | 0.00 | -0.01 | -0.12 | -0.05 | -0.12 | 0.05   | 0.11  |
| 15 | 23 | 0.00 | -1.23 | -0.88 | 0.51  | -0.88 | -0.51  | 1.09  |
| 15 | 24 | 0.00 | 1.91  | 0.58  | 0.09  | 0.58  | -0.09  | 1.20  |
| 15 | 25 | 0.00 | 0.78  | 0.24  | 0.12  | 0.24  | -0.12  | 0.50  |
| 15 | 26 | 0.00 | -1.82 | -1.33 | 0.57  | -1.33 | -0.57  | 1.58  |
| 15 | 27 | 0.00 | 27.67 | 5.77  | 0.77  | 5.77  | -0.77  | 16.67 |
| 15 | 28 | 0.00 | -6.87 | -0.8  | -1.79 | -0.8  | 1.79   | 4.28  |
| 15 | 29 | 0.00 | 78.85 | 8.03  | 19.46 | 8.03  | -19.46 | 48.66 |
| 15 | 30 | 0.00 | -0.22 | -1.38 | 1.83  | -1.38 | -1.83  | 1.88  |
| 16 | 0  | 0.00 | -4.1  | 3.11  | -1.55 | 3.11  | 1.55   | 3.70  |
| 16 | 1  | 0.00 | -0.28 | 0.18  | -0.08 | 0.18  | 0.08   | 0.23  |
| 16 | 2  | 0.00 | -0.17 | 0.09  | 0.08  | 0.09  | -0.08  | 0.14  |
| 16 | 3  | 0.00 | 0.65  | -0.32 | 0.2   | -0.32 | -0.2   | 0.49  |
| 16 | 4  | 0.00 | -0.14 | 0.26  | -0.04 | 0.26  | 0.04   | 0.23  |
| 16 | 5  | 0.00 | 0.4   | -0.94 | 0.05  | -0.94 | -0.05  | 0.80  |
| 16 | 6  | 0.00 | 0.07  | -0.06 | 0     | -0.06 | 0      | 0.06  |
| 16 | 7  | 0.00 | -0.21 | -0.01 | 0.14  | -0.01 | -0.14  | 0.17  |
| 16 | 8  | 0.00 | 0.06  | 0.01  | -0.08 | 0.01  | 0.08   | 0.07  |
| 16 | 9  | 0.00 | -0.08 | 0.01  | -0.01 | 0.01  | 0.01   | 0.05  |
| 16 | 10 | 0.00 | 0.27  | -0.14 | 0.1   | -0.14 | -0.1   | 0.21  |
| 16 | 11 | 0.00 | 5.65  | 0.78  | -1.69 | 0.78  | 1.69   | 3.60  |
| 16 | 12 | 0.00 | -1.78 | -0.41 | 0.16  | -0.41 | -0.16  | 1.09  |
| 16 | 13 | 0.00 | -1.35 | 1.3   | -1.43 | 1.3   | 1.43   | 1.76  |
| 16 | 14 | 0.00 | -0.77 | -0.96 | 0.87  | -0.96 | -0.87  | 1.15  |
| 16 | 15 | 0.00 | -0.95 | -0.24 | 0.36  | -0.24 | -0.36  | 0.65  |
| 16 | 16 | 0.00 | 0.1   | -0.11 | 0.08  | -0.11 | -0.08  | 0.13  |
| 16 | 17 | 0.00 | -0.65 | -0.3  | 0.13  | -0.3  | -0.13  | 0.46  |
| 16 | 18 | 0.00 | 1.65  | 0.23  | -0.6  | 0.23  | 0.6    | 1.09  |
| 16 | 19 | 0.00 | -0.62 | -0.01 | 0.2   | -0.01 | -0.2   | 0.39  |
| 16 | 20 | 0.00 | 0.54  | 0.14  | -0.45 | 0.14  | 0.45   | 0.50  |
| 16 | 21 | 0.00 | 0.09  | -0.05 | -0.05 | -0.05 | 0.05   | 0.08  |
| 16 | 22 | 0.00 | 3.01  | 5.07  | -2.99 | 5.07  | 2.99   | 5.11  |
| 16 | 23 | 0.00 | 2.7   | 1.27  | 0.02  | 1.27  | -0.02  | 1.87  |
| 16 | 24 | 0.00 | 0.77  | -0.68 | 0.35  | -0.68 | -0.35  | 0.77  |
| 16 | 25 | 0.00 | -0.67 | -0.73 | -0.88 | -0.73 | 0.88   | 1.01  |
| 16 | 26 | 0.00 | -0.36 | 0.06  | 0.09  | 0.06  | -0.09  | 0.23  |
| 16 | 27 | 0.00 | 1     | -0.32 | -0.55 | -0.32 | 0.55   | 0.78  |
| 16 | 28 | 0.00 | 0.25  | -0.58 | -0.21 | -0.58 | 0.21   | 0.52  |
| 16 | 29 | 0.00 | 0.34  | -0.12 | 2.3   | -0.12 | -2.3   | 1.89  |

---

---

|    |    |      |       |       |       |       |       |       |
|----|----|------|-------|-------|-------|-------|-------|-------|
| 16 | 30 | 0.00 | 21.2  | -3.86 | -9.02 | -3.86 | 9.02  | 14.63 |
| 17 | 0  | 0.00 | 2.99  | -2.09 | -3.73 | -2.09 | 3.73  | 3.89  |
| 17 | 1  | 0.00 | -0.09 | 0.09  | -0.32 | 0.09  | 0.32  | 0.28  |
| 17 | 2  | 0.00 | 0.18  | -0.06 | 0.23  | -0.06 | -0.23 | 0.22  |
| 17 | 3  | 0.00 | 0.11  | 0.15  | -0.34 | 0.15  | 0.34  | 0.31  |
| 17 | 4  | 0.00 | -0.34 | -0.03 | -0.06 | -0.03 | 0.06  | 0.20  |
| 17 | 5  | 0.00 | -0.16 | 0.15  | -0.31 | 0.15  | 0.31  | 0.30  |
| 17 | 6  | 0.00 | -0.53 | 0.04  | 0.15  | 0.04  | -0.15 | 0.33  |
| 17 | 7  | 0.00 | -0.51 | 0.65  | -0.09 | 0.65  | 0.09  | 0.61  |
| 17 | 8  | 0.00 | -0.14 | -0.07 | 0.06  | -0.07 | -0.06 | 0.11  |
| 17 | 9  | 0.00 | -0.1  | 0.18  | 0     | 0.18  | 0     | 0.16  |
| 17 | 10 | 0.00 | 5.42  | 1.4   | -1.81 | 1.4   | 1.81  | 3.64  |
| 17 | 11 | 0.00 | 0.92  | -0.06 | -0.14 | -0.06 | 0.14  | 0.55  |
| 17 | 12 | 0.00 | -1.26 | 0.12  | -0.14 | 0.12  | 0.14  | 0.74  |
| 17 | 13 | 0.00 | -6.67 | 0.09  | 0.28  | 0.09  | -0.28 | 3.86  |
| 17 | 14 | 0.00 | 0.92  | -0.03 | 0.15  | -0.03 | -0.15 | 0.55  |
| 17 | 15 | 0.00 | -1.92 | -0.48 | 0.19  | -0.48 | -0.19 | 1.19  |
| 17 | 16 | 0.00 | 0.5   | -0.02 | -0.02 | -0.02 | 0.02  | 0.29  |
| 17 | 17 | 0.00 | -0.53 | 0.67  | -0.55 | 0.67  | 0.55  | 0.77  |
| 17 | 18 | 0.00 | -0.54 | -0.52 | 0.19  | -0.52 | -0.19 | 0.55  |
| 17 | 19 | 0.00 | -0.57 | 0.05  | 0.05  | 0.05  | -0.05 | 0.33  |
| 17 | 20 | 0.00 | 1.11  | 0.02  | -0.05 | 0.02  | 0.05  | 0.64  |
| 17 | 21 | 0.00 | 0.33  | -0.19 | -0.07 | -0.19 | 0.07  | 0.25  |
| 17 | 22 | 0.00 | -2.97 | 1.22  | 0.65  | 1.22  | -0.65 | 2.05  |
| 17 | 23 | 0.00 | 5.33  | 2.47  | -0.66 | 2.47  | 0.66  | 3.72  |
| 17 | 24 | 0.00 | 2.56  | -0.08 | 0.09  | -0.08 | -0.09 | 1.48  |
| 17 | 25 | 0.00 | -0.08 | 0.01  | -0.41 | 0.01  | 0.41  | 0.34  |
| 17 | 26 | 0.00 | 0.08  | 0.03  | -0.04 | 0.03  | 0.04  | 0.06  |
| 17 | 27 | 0.00 | 3.28  | -0.68 | -1.28 | -0.68 | 1.28  | 2.23  |
| 17 | 28 | 0.00 | 1.97  | -0.04 | 0.07  | -0.04 | -0.07 | 1.14  |
| 17 | 29 | 0.00 | -7.03 | 1.64  | -1.94 | 1.64  | 1.94  | 4.56  |
| 17 | 30 | 0.00 | 1.16  | -0.59 | -0.92 | -0.59 | 0.92  | 1.12  |
| 18 | 0  | 0.00 | -0.67 | 2.93  | 1.39  | 2.93  | -1.39 | 2.68  |
| 18 | 1  | 0.00 | -0.28 | 0.32  | -0.52 | 0.32  | 0.52  | 0.52  |
| 18 | 2  | 0.00 | -0.35 | 0.17  | -0.18 | 0.17  | 0.18  | 0.29  |
| 18 | 3  | 0.00 | 0.65  | 0.05  | -0.7  | 0.05  | 0.7   | 0.68  |
| 18 | 4  | 0.00 | 0.3   | 0.13  | 0.05  | 0.13  | -0.05 | 0.21  |
| 18 | 5  | 0.00 | -0.27 | -0.19 | -0.63 | -0.19 | 0.63  | 0.56  |
| 18 | 6  | 0.00 | 0.23  | 0.03  | -0.07 | 0.03  | 0.07  | 0.15  |
| 18 | 7  | 0.00 | 0.26  | -0.21 | -0.42 | -0.21 | 0.42  | 0.41  |
| 18 | 8  | 0.00 | 0     | 0.01  | -0.01 | 0.01  | 0.01  | 0.01  |
| 18 | 9  | 0.00 | 0.03  | 0.01  | -0.08 | 0.01  | 0.08  | 0.07  |
| 18 | 10 | 0.00 | -2.07 | -0.53 | 0.86  | -0.53 | -0.86 | 1.45  |
| 18 | 11 | 0.00 | -1.48 | -0.26 | 0.46  | -0.26 | -0.46 | 0.96  |

---

---

|    |    |      |        |       |       |       |       |       |
|----|----|------|--------|-------|-------|-------|-------|-------|
| 18 | 12 | 0.00 | -1.77  | -0.62 | 0.71  | -0.62 | -0.71 | 1.28  |
| 18 | 13 | 0.00 | 3.03   | 0.11  | -0.41 | 0.11  | 0.41  | 1.78  |
| 18 | 14 | 0.00 | 1.46   | 0.27  | -0.64 | 0.27  | 0.64  | 1.02  |
| 18 | 15 | 0.00 | -3.55  | -0.79 | 1.21  | -0.79 | -1.21 | 2.36  |
| 18 | 16 | 0.00 | -0.2   | 0     | 0.02  | 0     | -0.02 | 0.12  |
| 18 | 17 | 0.00 | 1.34   | 1.48  | -1.27 | 1.48  | 1.27  | 1.77  |
| 18 | 18 | 0.00 | -0.19  | 0.01  | 0.1   | 0.01  | -0.1  | 0.14  |
| 18 | 19 | 0.00 | -1.74  | -0.44 | 0.57  | -0.44 | -0.57 | 1.16  |
| 18 | 20 | 0.00 | -0.33  | 0.16  | -0.19 | 0.16  | 0.19  | 0.28  |
| 18 | 21 | 0.00 | 0.01   | -0.02 | -0.02 | -0.02 | 0.02  | 0.02  |
| 18 | 22 | 0.00 | -6.85  | 6.8   | -0.84 | 6.8   | 0.84  | 6.85  |
| 18 | 23 | 0.00 | -5.1   | -2.1  | -3.88 | -2.1  | 3.88  | 4.65  |
| 18 | 24 | 0.00 | -0.5   | -0.07 | 0.27  | -0.07 | -0.27 | 0.37  |
| 18 | 25 | 0.00 | 0.35   | -0.29 | 0.19  | -0.29 | -0.19 | 0.35  |
| 18 | 26 | 0.00 | 0.28   | 0.06  | -0.21 | 0.06  | 0.21  | 0.24  |
| 18 | 27 | 0.00 | 2.91   | -0.64 | -1    | -0.64 | 1     | 1.94  |
| 18 | 28 | 0.00 | -0.62  | -0.14 | -0.03 | -0.14 | 0.03  | 0.38  |
| 18 | 29 | 0.00 | 1.74   | -0.05 | 1.15  | -0.05 | -1.15 | 1.38  |
| 18 | 30 | 0.00 | 8.06   | -1.71 | -3.27 | -1.71 | 3.27  | 5.54  |
| 19 | 0  | 0.00 | -17.96 | 10.96 | 5.69  | 10.96 | -5.69 | 14.46 |
| 19 | 1  | 0.00 | -0.93  | -0.02 | 0.94  | -0.02 | -0.94 | 0.94  |
| 19 | 2  | 0.00 | 2.2    | -0.31 | -1.63 | -0.31 | 1.63  | 1.86  |
| 19 | 3  | 0.00 | -0.1   | 0.13  | -0.04 | 0.13  | 0.04  | 0.13  |
| 19 | 4  | 0.00 | 1.8    | -1.48 | -0.14 | -1.48 | 0.14  | 1.60  |
| 19 | 5  | 0.00 | 0.92   | -0.88 | -0.04 | -0.88 | 0.04  | 0.89  |
| 19 | 6  | 0.00 | 0.51   | -0.41 | -0.19 | -0.41 | 0.19  | 0.47  |
| 19 | 7  | 0.00 | 0.28   | 0.14  | -0.09 | 0.14  | 0.09  | 0.21  |
| 19 | 8  | 0.00 | 0.17   | -0.08 | -0.08 | -0.08 | 0.08  | 0.13  |
| 19 | 9  | 0.00 | 0.08   | 0.09  | -0.01 | 0.09  | 0.01  | 0.09  |
| 19 | 10 | 0.00 | 0.46   | -0.52 | 0.05  | -0.52 | -0.05 | 0.50  |
| 19 | 11 | 0.00 | 0.23   | -0.62 | 0.17  | -0.62 | -0.17 | 0.54  |
| 19 | 12 | 0.00 | 0.12   | -0.41 | 0.17  | -0.41 | -0.17 | 0.37  |
| 19 | 13 | 0.00 | -0.02  | 0.06  | 0.02  | 0.06  | -0.02 | 0.05  |
| 19 | 14 | 0.00 | 1.59   | -1.34 | 0.21  | -1.34 | -0.21 | 1.44  |
| 19 | 15 | 0.00 | -0.89  | -0.17 | 0.16  | -0.17 | -0.16 | 0.55  |
| 19 | 16 | 0.00 | 0.16   | -0.18 | -0.01 | -0.18 | 0.01  | 0.17  |
| 19 | 17 | 0.00 | 0.04   | 0.08  | -0.05 | 0.08  | 0.05  | 0.08  |
| 19 | 18 | 0.00 | 1.11   | 0.13  | -0.34 | 0.13  | 0.34  | 0.71  |
| 19 | 19 | 0.00 | 1.87   | 0.22  | -0.42 | 0.22  | 0.42  | 1.15  |
| 19 | 20 | 0.00 | -0.18  | 0.2   | -0.12 | 0.2   | 0.12  | 0.22  |
| 19 | 21 | 0.00 | 2.37   | 0.25  | 0.29  | 0.25  | -0.29 | 1.40  |
| 19 | 22 | 0.00 | -2.86  | 1.88  | 0.36  | 1.88  | -0.36 | 2.27  |
| 19 | 23 | 0.00 | -1.3   | 0.22  | 0.3   | 0.22  | -0.3  | 0.81  |
| 19 | 24 | 0.00 | -3.59  | 0.94  | 0.77  | 0.94  | -0.77 | 2.30  |

---

|    |    |      |        |        |        |         |         |        |
|----|----|------|--------|--------|--------|---------|---------|--------|
| 19 | 25 | 0.00 | -3.04  | 0.64   | 0.75   | 0.64    | -0.75   | 1.93   |
| 19 | 26 | 0.00 | 1.5    | -0.34  | -0.47  | -0.34   | 0.47    | 0.99   |
| 19 | 27 | 0.00 | -      | 147.78 | 263.16 | 147.78  | -263.16 | 439.66 |
|    |    |      | 630.65 |        |        |         |         |        |
| 19 | 28 | 0.00 | -2.13  | -0.12  | -1.03  | -0.12   | 1.03    | 1.49   |
| 19 | 29 | 0.00 | 65.69  | -7.35  | -5.33  | -7.35   | 5.33    | 38.64  |
| 19 | 30 | 0.00 | 76.11  | -15.99 | -29.88 | -15.99  | 29.88   | 51.93  |
| 20 | 0  | 0.00 | -      | 361.09 | -9.54  | 361.09  | 9.54    | 362.63 |
|    |    |      | 365.44 |        |        |         |         |        |
| 20 | 1  | 0.00 | 1.52   | 1.24   | 0.37   | 1.24    | -0.37   | 1.37   |
| 20 | 2  | 0.00 | -0.49  | 3.09   | -0.34  | 3.09    | 0.34    | 2.55   |
| 20 | 3  | 0.00 | 8.46   | -18.93 | 4.28   | -18.93  | -4.28   | 16.58  |
| 20 | 4  | 0.00 | -0.59  | 0.35   | -1.04  | 0.35    | 1.04    | 0.96   |
| 20 | 5  | 0.00 | 7.23   | -13.75 | 5.06   | -13.75  | -5.06   | 12.67  |
| 20 | 6  | 0.00 | 1.45   | -3.4   | 1.44   | -3.4    | -1.44   | 3.13   |
| 20 | 7  | 0.00 | 0.8    | -2.53  | 0.85   | -2.53   | -0.85   | 2.23   |
| 20 | 8  | 0.00 | 0.9    | -1.26  | 0.27   | -1.26   | -0.27   | 1.17   |
| 20 | 9  | 0.00 | 0.29   | -0.34  | 0.03   | -0.34   | -0.03   | 0.33   |
| 20 | 10 | 0.00 | 3.86   | -10.43 | 4.24   | -10.43  | -4.24   | 9.46   |
| 20 | 11 | 0.00 | 2.71   | -11.18 | 4.02   | -11.18  | -4.02   | 9.83   |
| 20 | 12 | 0.00 | 1.28   | -9.65  | 3.57   | -9.65   | -3.57   | 8.43   |
| 20 | 13 | 0.00 | 1.71   | -6.39  | 2.48   | -6.39   | -2.48   | 5.68   |
| 20 | 14 | 0.00 | 7.8    | -27.67 | 10.6   | -27.67  | -10.6   | 24.61  |
| 20 | 15 | 0.00 | 1.6    | -3.03  | 0.28   | -3.03   | -0.28   | 2.65   |
| 20 | 16 | 0.00 | 0.72   | -1.63  | 0.69   | -1.63   | -0.69   | 1.50   |
| 20 | 17 | 0.00 | -0.12  | -0.07  | 0.06   | -0.07   | -0.06   | 0.10   |
| 20 | 18 | 0.00 | -0.12  | -0.01  | -0.01  | -0.01   | 0.01    | 0.07   |
| 20 | 19 | 0.00 | 0.03   | -0.11  | -0.3   | -0.11   | 0.3     | 0.26   |
| 20 | 20 | 0.00 | 0.39   | 0.95   | -0.63  | 0.95    | 0.63    | 0.96   |
| 20 | 21 | 0.00 | 0.02   | 2.42   | -1.28  | 2.42    | 1.28    | 2.24   |
| 20 | 22 | 0.00 | 4.12   | -3.06  | -1.24  | -3.06   | 1.24    | 3.60   |
| 20 | 23 | 0.00 | -0.57  | 0.1    | -0.16  | 0.1     | 0.16    | 0.36   |
| 20 | 24 | 0.00 | 0.15   | 0.98   | -0.53  | 0.98    | 0.53    | 0.91   |
| 20 | 25 | 0.00 | 0.02   | 0.26   | -0.26  | 0.26    | 0.26    | 0.30   |
| 20 | 26 | 0.00 | 0.05   | -0.11  | 0.28   | -0.11   | -0.28   | 0.25   |
| 20 | 27 | 0.00 | 20.98  | -4.83  | -9.13  | -4.83   | 9.13    | 14.76  |
| 20 | 28 | 0.00 | -0.06  | -0.37  | 0.37   | -0.37   | -0.37   | 0.43   |
| 20 | 29 | 0.00 | -1.65  | -0.43  | 0.42   | -0.43   | -0.42   | 1.07   |
| 20 | 30 | 0.00 | -9.92  | 0.32   | 1.75   | 0.32    | -1.75   | 5.91   |
| 21 | 0  | 0.00 | -      | -      | -      | -113.07 | 336.13  | 356.47 |
|    |    |      | 360.12 | 113.07 | 336.13 |         |         |        |
| 21 | 1  | 0.00 | -2.9   | -0.91  | -5.22  | -0.91   | 5.22    | 4.64   |
| 21 | 2  | 0.00 | 3.78   | 1.42   | 9.06   | 1.42    | -9.06   | 7.80   |
| 21 | 3  | 0.00 | -4.21  | -0.47  | -6.7   | -0.47   | 6.7     | 6.00   |

|    |    |      |       |        |        |        |         |        |
|----|----|------|-------|--------|--------|--------|---------|--------|
| 21 | 4  | 0.00 | -3.18 | -0.41  | -6.21  | -0.41  | 6.21    | 5.40   |
| 21 | 5  | 0.00 | 2.38  | 0.69   | 3.82   | 0.69   | -3.82   | 3.45   |
| 21 | 6  | 0.00 | 10.92 | 2.27   | 20.83  | 2.27   | -20.83  | 18.23  |
| 21 | 7  | 0.00 | -4.44 | 0.19   | -8.82  | 0.19   | 8.82    | 7.65   |
| 21 | 8  | 0.00 | 2.17  | 0.42   | 4.56   | 0.42   | -4.56   | 3.94   |
| 21 | 9  | 0.00 | -0.86 | -0.08  | -1.48  | -0.08  | 1.48    | 1.31   |
| 21 | 10 | 0.00 | 1.72  | 0.38   | 4.3    | 0.38   | -4.3    | 3.66   |
| 21 | 11 | 0.00 | -5.48 | 0.72   | -15.61 | 0.72   | 15.61   | 13.15  |
| 21 | 12 | 0.00 | -2.65 | 1.61   | -13.29 | 1.61   | 13.29   | 11.04  |
| 21 | 13 | 0.00 | 0.35  | -0.17  | 2.04   | -0.17  | -2.04   | 1.68   |
| 21 | 14 | 0.00 | 3.49  | -0.15  | 12.22  | -0.15  | -12.22  | 10.18  |
| 21 | 15 | 0.00 | -6.34 | 2.33   | -26.39 | 2.33   | 26.39   | 21.94  |
| 21 | 16 | 0.00 | 0.28  | -0.12  | -0.39  | -0.12  | 0.39    | 0.37   |
| 21 | 17 | 0.00 | 0.46  | 0.17   | -0.6   | 0.17   | 0.6     | 0.57   |
| 21 | 18 | 0.00 | 1.4   | 0.55   | -2.29  | 0.55   | 2.29    | 2.09   |
| 21 | 19 | 0.00 | -2.02 | 1.56   | -10.85 | 1.56   | 10.85   | 9.03   |
| 21 | 20 | 0.00 | 0.49  | -0.05  | 0.24   | -0.05  | -0.24   | 0.35   |
| 21 | 21 | 0.00 | 0.34  | -0.24  | -0.04  | -0.24  | 0.04    | 0.28   |
| 21 | 22 | 0.00 | 1.87  | -0.45  | 0.28   | -0.45  | -0.28   | 1.16   |
| 21 | 23 | 0.00 | 11.05 | 3.2    | 6.21   | 3.2    | -6.21   | 8.56   |
| 21 | 24 | 0.00 | -1.38 | -0.51  | 0.56   | -0.51  | -0.56   | 1.01   |
| 21 | 25 | 0.00 | -0.32 | -0.14  | 0.28   | -0.14  | -0.28   | 0.32   |
| 21 | 26 | 0.00 | -0.18 | -0.41  | 2.52   | -0.41  | -2.52   | 2.09   |
| 21 | 27 | 0.00 | -1.67 | 0.32   | 0.76   | 0.32   | -0.76   | 1.18   |
| 21 | 28 | 0.00 | -0.35 | -0.19  | 0.78   | -0.19  | -0.78   | 0.69   |
| 21 | 29 | 0.00 | -0.2  | -0.15  | -0.22  | -0.15  | 0.22    | 0.25   |
| 21 | 30 | 0.00 | -1.1  | 0.22   | 0.6    | 0.22   | -0.6    | 0.82   |
| 22 | 0  | 0.00 | 346.2 | 211.8  | 298.93 | 211.8  | -298.93 | 359.76 |
| 22 | 1  | 0.00 | -0.73 | -0.87  | -0.27  | -0.87  | 0.27    | 0.85   |
| 22 | 2  | 0.00 | -1.37 | -1.51  | -1.65  | -1.51  | 1.65    | 1.99   |
| 22 | 3  | 0.00 | 3.12  | 4.8    | 4.5    | 4.8    | -4.5    | 5.67   |
| 22 | 4  | 0.00 | -8.3  | -15.12 | -14.16 | -15.12 | 14.16   | 17.58  |
| 22 | 5  | 0.00 | -3.25 | -5.81  | -5.21  | -5.81  | 5.21    | 6.64   |
| 22 | 6  | 0.00 | 1.19  | 1.58   | 1      | 1.58   | -1      | 1.67   |
| 22 | 7  | 0.00 | -0.34 | -1.05  | -0.36  | -1.05  | 0.36    | 0.93   |
| 22 | 8  | 0.00 | -6.01 | -8.18  | -8.06  | -8.18  | 8.06    | 10.00  |
| 22 | 9  | 0.00 | 1.7   | 4.8    | 1.59   | 4.8    | -1.59   | 4.24   |
| 22 | 10 | 0.00 | -0.81 | -0.97  | -0.87  | -0.97  | 0.87    | 1.16   |
| 22 | 11 | 0.00 | -0.62 | -5.56  | -3.65  | -5.56  | 3.65    | 5.44   |
| 22 | 12 | 0.00 | 1.38  | 5.18   | 4      | 5.18   | -4      | 5.40   |
| 22 | 13 | 0.00 | 7.1   | 27.63  | 19.35  | 27.63  | -19.35  | 27.85  |
| 22 | 14 | 0.00 | -1.82 | -5.35  | -3.81  | -5.35  | 3.81    | 5.46   |
| 22 | 15 | 0.00 | 0.98  | 0.43   | 0.11   | 0.43   | -0.11   | 0.67   |
| 22 | 16 | 0.00 | -0.12 | -1.76  | -1.16  | -1.76  | 1.16    | 1.72   |

---

|    |    |      |        |       |        |       |        |       |
|----|----|------|--------|-------|--------|-------|--------|-------|
| 22 | 17 | 0.00 | -0.35  | 2.11  | 0.3    | 2.11  | -0.3   | 1.75  |
| 22 | 18 | 0.00 | 0.12   | -0.23 | -0.09  | -0.23 | 0.09   | 0.21  |
| 22 | 19 | 0.00 | -0.39  | 0.57  | 0.16   | 0.57  | -0.16  | 0.53  |
| 22 | 20 | 0.00 | -2.41  | 0.83  | -0.28  | 0.83  | 0.28   | 1.56  |
| 22 | 21 | 0.00 | -0.09  | -0.12 | -0.03  | -0.12 | 0.03   | 0.11  |
| 22 | 22 | 0.00 | -0.73  | 0.44  | 0.1    | 0.44  | -0.1   | 0.56  |
| 22 | 23 | 0.00 | 0.24   | -0.55 | -0.22  | -0.55 | 0.22   | 0.50  |
| 22 | 24 | 0.00 | 5.7    | -8.66 | -2.16  | -8.66 | 2.16   | 8.00  |
| 22 | 25 | 0.00 | -15.41 | -6.06 | -10.66 | -6.06 | 10.66  | 13.39 |
| 22 | 26 | 0.00 | 0.15   | 0.65  | 0.46   | 0.65  | -0.46  | 0.66  |
| 22 | 27 | 0.00 | 3.84   | -0.98 | -2     | -0.98 | 2      | 2.87  |
| 22 | 28 | 0.00 | -0.19  | -5.53 | -3.34  | -5.53 | 3.34   | 5.28  |
| 22 | 29 | 0.00 | -4.02  | 2.56  | -3.3   | 2.56  | 3.3    | 4.13  |
| 22 | 30 | 0.00 | -1.22  | 0.41  | 0.05   | 0.41  | -0.05  | 0.78  |
| 23 | 0  | 0.00 | 73.55  | 41.61 | 57.13  | 41.61 | -57.13 | 71.65 |
| 23 | 1  | 0.00 | 0.38   | 0.18  | -0.48  | 0.18  | 0.48   | 0.47  |
| 23 | 2  | 0.00 | -0.67  | -0.27 | -0.46  | -0.27 | 0.46   | 0.58  |
| 23 | 3  | 0.00 | 0.14   | 0.88  | 1.19   | 0.88  | -1.19  | 1.21  |
| 23 | 4  | 0.00 | -2.4   | -2.9  | -3.31  | -2.9  | 3.31   | 3.85  |
| 23 | 5  | 0.00 | -0.09  | -1.09 | -1.49  | -1.09 | 1.49   | 1.51  |
| 23 | 6  | 0.00 | -0.41  | 0.29  | 0.84   | 0.29  | -0.84  | 0.76  |
| 23 | 7  | 0.00 | 0.11   | -0.1  | -0.38  | -0.1  | 0.38   | 0.33  |
| 23 | 8  | 0.00 | -2.09  | -2.06 | -1.16  | -2.06 | 1.16   | 2.28  |
| 23 | 9  | 0.00 | 0.84   | 0.84  | 1.06   | 0.84  | -1.06  | 1.21  |
| 23 | 10 | 0.00 | 0.32   | -0.54 | 0.02   | -0.54 | -0.02  | 0.48  |
| 23 | 11 | 0.00 | -2.94  | -1.14 | -1.21  | -1.14 | 1.21   | 2.17  |
| 23 | 12 | 0.00 | -1.21  | 2.17  | -0.4   | 2.17  | 0.4    | 1.93  |
| 23 | 13 | 0.00 | 2.12   | 5.49  | 4.31   | 5.49  | -4.31  | 5.83  |
| 23 | 14 | 0.00 | 1.83   | -1.33 | -0.17  | -1.33 | 0.17   | 1.52  |
| 23 | 15 | 0.00 | -6.36  | -1.26 | 0.27   | -1.26 | -0.27  | 3.82  |
| 23 | 16 | 0.00 | 0.06   | -0.55 | -0.3   | -0.55 | 0.3    | 0.51  |
| 23 | 17 | 0.00 | -0.24  | 0.44  | 0.12   | 0.44  | -0.12  | 0.40  |
| 23 | 18 | 0.00 | 0.22   | -0.02 | 0.16   | -0.02 | -0.16  | 0.18  |
| 23 | 19 | 0.00 | -1.59  | 0.4   | 0.29   | 0.4   | -0.29  | 1.00  |
| 23 | 20 | 0.00 | 0.18   | 0.54  | 0.26   | 0.54  | -0.26  | 0.50  |
| 23 | 21 | 0.00 | 1.2    | -0.64 | -0.43  | -0.64 | 0.43   | 0.94  |
| 23 | 22 | 0.00 | 0.62   | -0.74 | -0.3   | -0.74 | 0.3    | 0.74  |
| 23 | 23 | 0.00 | -3.77  | -1.43 | -1.99  | -1.43 | 1.99   | 2.96  |
| 23 | 24 | 0.00 | -9.21  | -3.63 | -6.72  | -3.63 | 6.72   | 8.20  |
| 23 | 25 | 0.00 | 30.99  | 5.04  | 19.33  | 5.04  | -19.33 | 24.21 |
| 23 | 26 | 0.00 | 0.39   | 0.07  | 0.13   | 0.07  | -0.13  | 0.26  |
| 23 | 27 | 0.00 | -6.77  | 1.07  | 2.95   | 1.07  | -2.95  | 4.67  |
| 23 | 28 | 0.00 | -0.38  | -1.15 | -0.94  | -1.15 | 0.94   | 1.23  |
| 23 | 29 | 0.00 | 10.08  | -0.29 | 5.18   | -0.29 | -5.18  | 7.20  |

---

---

|    |    |      |        |        |        |        |        |       |
|----|----|------|--------|--------|--------|--------|--------|-------|
| 23 | 30 | 0.00 | 2.98   | -0.06  | -0.15  | -0.06  | 0.15   | 1.73  |
| 24 | 0  | 0.00 | 20.53  | 29.13  | 26.82  | 29.13  | -26.82 | 34.43 |
| 24 | 1  | 0.00 | 0.98   | 0.46   | -0.7   | 0.46   | 0.7    | 0.89  |
| 24 | 2  | 0.00 | 0.99   | 0.59   | -0.83  | 0.59   | 0.83   | 1.01  |
| 24 | 3  | 0.00 | 0.6    | -0.25  | 0.96   | -0.25  | -0.96  | 0.88  |
| 24 | 4  | 0.00 | -0.55  | -1.27  | -0.49  | -1.27  | 0.49   | 1.16  |
| 24 | 5  | 0.00 | -0.41  | -0.89  | -0.55  | -0.89  | 0.55   | 0.89  |
| 24 | 6  | 0.00 | 0.63   | -0.04  | 0.34   | -0.04  | -0.34  | 0.46  |
| 24 | 7  | 0.00 | 1.05   | 0.21   | -0.3   | 0.21   | 0.3    | 0.68  |
| 24 | 8  | 0.00 | -1.22  | -0.74  | -1.05  | -0.74  | 1.05   | 1.26  |
| 24 | 9  | 0.00 | 1.24   | 0.58   | -0.16  | 0.58   | 0.16   | 0.87  |
| 24 | 10 | 0.00 | -0.11  | -1.22  | -0.43  | -1.22  | 0.43   | 1.06  |
| 24 | 11 | 0.00 | 0.1    | -1.01  | 0.32   | -1.01  | -0.32  | 0.87  |
| 24 | 12 | 0.00 | 1.21   | -0.33  | 1.34   | -0.33  | -1.34  | 1.33  |
| 24 | 13 | 0.00 | 0.63   | 2.11   | 1.81   | 2.11   | -1.81  | 2.30  |
| 24 | 14 | 0.00 | -1.02  | -1.22  | 0.43   | -1.22  | -0.43  | 1.21  |
| 24 | 15 | 0.00 | 2.54   | 0.42   | -0.62  | 0.42   | 0.62   | 1.59  |
| 24 | 16 | 0.00 | -1.39  | 0.15   | 0.51   | 0.15   | -0.51  | 0.91  |
| 24 | 17 | 0.00 | 0.27   | 0.07   | -0.04  | 0.07   | 0.04   | 0.17  |
| 24 | 18 | 0.00 | 4.31   | 0.01   | -0.22  | 0.01   | 0.22   | 2.49  |
| 24 | 19 | 0.00 | -0.37  | 0.51   | 0.66   | 0.51   | -0.66  | 0.71  |
| 24 | 20 | 0.00 | 0.62   | 0.95   | 0.12   | 0.95   | -0.12  | 0.86  |
| 24 | 21 | 0.00 | -0.11  | -0.19  | 0.18   | -0.19  | -0.18  | 0.22  |
| 24 | 22 | 0.00 | -38.09 | 24.81  | 7.55   | 24.81  | -7.55  | 30.53 |
| 24 | 23 | 0.00 | 6.54   | -0.05  | 2.02   | -0.05  | -2.02  | 4.12  |
| 24 | 24 | 0.00 | -14.6  | -4.27  | -9.9   | -4.27  | 9.9    | 12.19 |
| 24 | 25 | 0.00 | 50.27  | 11.31  | 31.12  | 11.31  | -31.12 | 39.66 |
| 24 | 26 | 0.00 | 0.31   | 0.55   | -0.01  | 0.55   | 0.01   | 0.48  |
| 24 | 27 | 0.00 | 32.42  | -6.18  | -11.11 | -6.18  | 11.11  | 21.40 |
| 24 | 28 | 0.00 | -1.81  | -0.22  | -0.96  | -0.22  | 0.96   | 1.32  |
| 24 | 29 | 0.00 | 30.04  | 0.18   | 17.2   | 0.18   | -17.2  | 22.32 |
| 24 | 30 | 0.00 | 55.82  | -12.25 | -19.82 | -12.25 | 19.82  | 37.42 |
| 25 | 0  | 0.00 | -64.85 | -7.51  | -43.89 | -7.51  | 43.89  | 52.19 |
| 25 | 1  | 0.00 | -0.98  | -0.22  | -0.11  | -0.22  | 0.11   | 0.60  |
| 25 | 2  | 0.00 | 0.03   | -0.17  | 1.27   | -0.17  | -1.27  | 1.05  |
| 25 | 3  | 0.00 | -0.08  | -0.83  | -0.39  | -0.83  | 0.39   | 0.75  |
| 25 | 4  | 0.00 | 0.22   | 1.09   | 0.1    | 1.09   | -0.1   | 0.90  |
| 25 | 5  | 0.00 | -0.06  | -0.23  | 0.56   | -0.23  | -0.56  | 0.50  |
| 25 | 6  | 0.00 | 2.09   | 0.11   | 1.75   | 0.11   | -1.75  | 1.87  |
| 25 | 7  | 0.00 | -0.13  | 0.63   | -0.91  | 0.63   | 0.91   | 0.91  |
| 25 | 8  | 0.00 | 0.82   | 0.61   | 0.99   | 0.61   | -0.99  | 1.06  |
| 25 | 9  | 0.00 | -1.31  | 0.2    | -0.37  | 0.2    | 0.37   | 0.83  |
| 25 | 10 | 0.00 | 0.18   | -0.67  | 0.3    | -0.67  | -0.3   | 0.61  |
| 25 | 11 | 0.00 | -1.17  | 0.05   | -0.76  | 0.05   | 0.76   | 0.92  |

---

---

|    |    |      |        |        |        |        |       |       |
|----|----|------|--------|--------|--------|--------|-------|-------|
| 25 | 12 | 0.00 | -1.01  | -0.31  | -0.51  | -0.31  | 0.51  | 0.76  |
| 25 | 13 | 0.00 | -1.74  | -1.74  | -0.76  | -1.74  | 0.76  | 1.85  |
| 25 | 14 | 0.00 | -2.42  | -1.24  | 2.35   | -1.24  | -2.35 | 2.58  |
| 25 | 15 | 0.00 | -1.12  | 0.1    | -2.01  | 0.1    | 2.01  | 1.77  |
| 25 | 16 | 0.00 | -1.44  | 0.47   | 0.44   | 0.47   | -0.44 | 0.98  |
| 25 | 17 | 0.00 | 0.1    | -0.22  | 0.09   | -0.22  | -0.09 | 0.20  |
| 25 | 18 | 0.00 | 0.38   | -0.23  | -0.47  | -0.23  | 0.47  | 0.48  |
| 25 | 19 | 0.00 | -1.49  | -0.1   | -1.14  | -0.1   | 1.14  | 1.27  |
| 25 | 20 | 0.00 | -5.52  | -0.13  | -0.22  | -0.13  | 0.22  | 3.19  |
| 25 | 21 | 0.00 | 0.05   | 0.12   | 0.07   | 0.12   | -0.07 | 0.12  |
| 25 | 22 | 0.00 | -45.07 | 27.74  | 7.63   | 27.74  | -7.63 | 35.06 |
| 25 | 23 | 0.00 | -23.02 | -9.63  | -15.44 | -9.63  | 15.44 | 19.93 |
| 25 | 24 | 0.00 | 10.28  | 2.42   | 5.78   | 2.42   | -5.78 | 7.84  |
| 25 | 25 | 0.00 | -23.12 | -5.74  | -15.1  | -5.74  | 15.1  | 18.77 |
| 25 | 26 | 0.00 | -0.11  | 0.12   | 0.16   | 0.12   | -0.16 | 0.18  |
| 25 | 27 | 0.00 | 15.14  | -5.53  | -8.36  | -5.53  | 8.36  | 11.97 |
| 25 | 28 | 0.00 | 1.91   | 0.35   | 0.75   | 0.35   | -0.75 | 1.29  |
| 25 | 29 | 0.00 | -32.17 | 2.74   | -7.62  | 2.74   | 7.62  | 19.72 |
| 25 | 30 | 0.00 | 34.29  | -9.81  | -15.88 | -9.81  | 15.88 | 24.98 |
| 26 | 0  | 0.00 | 1.16   | -9.37  | -8.84  | -9.37  | 8.84  | 10.54 |
| 26 | 1  | 0.00 | 2.38   | -0.08  | -1.55  | -0.08  | 1.55  | 1.87  |
| 26 | 2  | 0.00 | 2.36   | 0.04   | -0.32  | 0.04   | 0.32  | 1.39  |
| 26 | 3  | 0.00 | -0.4   | 0.38   | -1.2   | 0.38   | 1.2   | 1.05  |
| 26 | 4  | 0.00 | -0.6   | -1.29  | -1.24  | -1.29  | 1.24  | 1.50  |
| 26 | 5  | 0.00 | 0.17   | 0.61   | 0.4    | 0.61   | -0.4  | 0.60  |
| 26 | 6  | 0.00 | 1.71   | 0.43   | 1.68   | 0.43   | -1.68 | 1.73  |
| 26 | 7  | 0.00 | -0.78  | 0.67   | -0.49  | 0.67   | 0.49  | 0.81  |
| 26 | 8  | 0.00 | 0.8    | -0.79  | -0.15  | -0.79  | 0.15  | 0.80  |
| 26 | 9  | 0.00 | 1.36   | -0.01  | 0.25   | -0.01  | -0.25 | 0.81  |
| 26 | 10 | 0.00 | -0.09  | 0.77   | 0.6    | 0.77   | -0.6  | 0.80  |
| 26 | 11 | 0.00 | -0.66  | 0.3    | -1.28  | 0.3    | 1.28  | 1.14  |
| 26 | 12 | 0.00 | -0.41  | 0.35   | -0.89  | 0.35   | 0.89  | 0.82  |
| 26 | 13 | 0.00 | -0.42  | 1.63   | 1.46   | 1.63   | -1.46 | 1.80  |
| 26 | 14 | 0.00 | -2.72  | -0.32  | 1.2    | -0.32  | -1.2  | 1.87  |
| 26 | 15 | 0.00 | 1.48   | 0.62   | -1.43  | 0.62   | 1.43  | 1.53  |
| 26 | 16 | 0.00 | -2.62  | 1.26   | 0.68   | 1.26   | -0.68 | 1.91  |
| 26 | 17 | 0.00 | 0.16   | 0.15   | -0.16  | 0.15   | 0.16  | 0.20  |
| 26 | 18 | 0.00 | 1.19   | -0.4   | 0.14   | -0.4   | -0.14 | 0.77  |
| 26 | 19 | 0.00 | -0.16  | 0.43   | -0.56  | 0.43   | 0.56  | 0.58  |
| 26 | 20 | 0.00 | -3.96  | 0.24   | 0.53   | 0.24   | -0.53 | 2.34  |
| 26 | 21 | 0.00 | -2.71  | 1.89   | 0.5    | 1.89   | -0.5  | 2.24  |
| 26 | 22 | 0.00 | 49.08  | -33.81 | -11.23 | -33.81 | 11.23 | 40.61 |
| 26 | 23 | 0.00 | -36.73 | -8.79  | -18.9  | -8.79  | 18.9  | 27.19 |
| 26 | 24 | 0.00 | -5.75  | -1.85  | -4.36  | -1.85  | 4.36  | 5.10  |

---



---

|    |    |      |        |       |        |       |        |       |
|----|----|------|--------|-------|--------|-------|--------|-------|
| 26 | 25 | 0.00 | 29.09  | 7.32  | 18.47  | 7.32  | -18.47 | 23.35 |
| 26 | 26 | 0.00 | 0.23   | -0.09 | 0.48   | -0.09 | -0.48  | 0.42  |
| 26 | 27 | 0.00 | -11.81 | 3.92  | 4.95   | 3.92  | -4.95  | 8.55  |
| 26 | 28 | 0.00 | 0.79   | -0.25 | 0.43   | -0.25 | -0.43  | 0.61  |
| 26 | 29 | 0.00 | 25.19  | -1.23 | 5.94   | -1.23 | -5.94  | 15.36 |
| 26 | 30 | 0.00 | -26.12 | 8.24  | 12.22  | 8.24  | -12.22 | 19.29 |
| 27 | 0  | 0.00 | -10.53 | -0.98 | -9.54  | -0.98 | 9.54   | 9.91  |
| 27 | 1  | 0.00 | 3.04   | 0.39  | -1.33  | 0.39  | 1.33   | 2.09  |
| 27 | 2  | 0.00 | 4.94   | 1.53  | -0.48  | 1.53  | 0.48   | 3.14  |
| 27 | 3  | 0.00 | 0.44   | -0.38 | -0.65  | -0.38 | 0.65   | 0.67  |
| 27 | 4  | 0.00 | -0.39  | -1.45 | -0.77  | -1.45 | 0.77   | 1.36  |
| 27 | 5  | 0.00 | 0.25   | 0.48  | 0.39   | 0.48  | -0.39  | 0.53  |
| 27 | 6  | 0.00 | 1.99   | 0.18  | 0.61   | 0.18  | -0.61  | 1.26  |
| 27 | 7  | 0.00 | -1.5   | -0.3  | -0.19  | -0.3  | 0.19   | 0.91  |
| 27 | 8  | 0.00 | -0.64  | 0.22  | -0.27  | 0.22  | 0.27   | 0.47  |
| 27 | 9  | 0.00 | -0.44  | -0.04 | 0.14   | -0.04 | -0.14  | 0.28  |
| 27 | 10 | 0.00 | -0.12  | -0.12 | 0.06   | -0.12 | -0.06  | 0.13  |
| 27 | 11 | 0.00 | 0.63   | 0.28  | -0.86  | 0.28  | 0.86   | 0.82  |
| 27 | 12 | 0.00 | 0.71   | 0.43  | -0.55  | 0.43  | 0.55   | 0.70  |
| 27 | 13 | 0.00 | 1.68   | 0.13  | 0.72   | 0.13  | -0.72  | 1.14  |
| 27 | 14 | 0.00 | -1.04  | -0.3  | 0.21   | -0.3  | -0.21  | 0.67  |
| 27 | 15 | 0.00 | 2.61   | 1.09  | -0.88  | 1.09  | 0.88   | 1.89  |
| 27 | 16 | 0.00 | -2.19  | 2.09  | 1      | 2.09  | -1     | 2.28  |
| 27 | 17 | 0.00 | 0.04   | -0.04 | -0.05  | -0.04 | 0.05   | 0.06  |
| 27 | 18 | 0.00 | -1.66  | -0.27 | -0.18  | -0.27 | 0.18   | 0.99  |
| 27 | 19 | 0.00 | -1.02  | -0.34 | -0.48  | -0.34 | 0.48   | 0.76  |
| 27 | 20 | 0.00 | 1.25   | -0.16 | 0.15   | -0.16 | -0.15  | 0.74  |
| 27 | 21 | 0.00 | -4.59  | 1.68  | 1.36   | 1.68  | -1.36  | 3.18  |
| 27 | 22 | 0.00 | -8.95  | 5.2   | 1.42   | 5.2   | -1.42  | 6.79  |
| 27 | 23 | 0.00 | -5.74  | -2.64 | -3.05  | -2.64 | 3.05   | 4.67  |
| 27 | 24 | 0.00 | 4.13   | 0.52  | 1.42   | 0.52  | -1.42  | 2.69  |
| 27 | 25 | 0.00 | -2.77  | -0.61 | -2.02  | -0.61 | 2.02   | 2.35  |
| 27 | 26 | 0.00 | -0.49  | -0.8  | -1.28  | -0.8  | 1.28   | 1.26  |
| 27 | 27 | 0.00 | 17.47  | 9.31  | 4.07   | 9.31  | -4.07  | 13.06 |
| 27 | 28 | 0.00 | -4.04  | -1.25 | -1.03  | -1.25 | 1.03   | 2.68  |
| 27 | 29 | 0.00 | 52.73  | 15.76 | 7.84   | 15.76 | -7.84  | 33.67 |
| 27 | 30 | 0.00 | -6.28  | 1.64  | 4.91   | 1.64  | -4.91  | 5.57  |
| 28 | 0  | 0.00 | -44.73 | -15.1 | -36.68 | -15.1 | 36.68  | 41.42 |
| 28 | 1  | 0.00 | 0.56   | -0.74 | -0.94  | -0.74 | 0.94   | 1.03  |
| 28 | 2  | 0.00 | 1.97   | 0.26  | 0.35   | 0.26  | -0.35  | 1.19  |
| 28 | 3  | 0.00 | 0.18   | -0.72 | -1.25  | -0.72 | 1.25   | 1.18  |
| 28 | 4  | 0.00 | 0.45   | -0.2  | -0.64  | -0.2  | 0.64   | 0.61  |
| 28 | 5  | 0.00 | -0.78  | 0.29  | 0.9    | 0.29  | -0.9   | 0.89  |
| 28 | 6  | 0.00 | 4.22   | 1.68  | 1.69   | 1.68  | -1.69  | 3.12  |

---

---

|    |    |      |        |        |        |        |        |       |
|----|----|------|--------|--------|--------|--------|--------|-------|
| 28 | 7  | 0.00 | -1.98  | -0.16  | -0.33  | -0.16  | 0.33   | 1.18  |
| 28 | 8  | 0.00 | 0.99   | 0.2    | 0.43   | 0.2    | -0.43  | 0.69  |
| 28 | 9  | 0.00 | -1.06  | 0.15   | -0.32  | 0.15   | 0.32   | 0.68  |
| 28 | 10 | 0.00 | 0.58   | 0.05   | 0.3    | 0.05   | -0.3   | 0.42  |
| 28 | 11 | 0.00 | 0.93   | 0.08   | -1.8   | 0.08   | 1.8    | 1.57  |
| 28 | 12 | 0.00 | 1.42   | 0.72   | -1.15  | 0.72   | 1.15   | 1.38  |
| 28 | 13 | 0.00 | 0.04   | -0.15  | 0.12   | -0.15  | -0.12  | 0.16  |
| 28 | 14 | 0.00 | 1.54   | 0.12   | 0.47   | 0.12   | -0.47  | 0.97  |
| 28 | 15 | 0.00 | 1.5    | 1      | -1.91  | 1      | 1.91   | 1.96  |
| 28 | 16 | 0.00 | -4.59  | 1.87   | 1.33   | 1.87   | -1.33  | 3.25  |
| 28 | 17 | 0.00 | -1     | -0.1   | -0.03  | -0.1   | 0.03   | 0.58  |
| 28 | 18 | 0.00 | -0.53  | -1     | -0.39  | -1     | 0.39   | 0.93  |
| 28 | 19 | 0.00 | -3.09  | -0.41  | -1.73  | -0.41  | 1.73   | 2.30  |
| 28 | 20 | 0.00 | 4.29   | -0.24  | 0.01   | -0.24  | -0.01  | 2.48  |
| 28 | 21 | 0.00 | -4.34  | 2.62   | 1.06   | 2.62   | -1.06  | 3.41  |
| 28 | 22 | 0.00 | -15.46 | 5.8    | 0.3    | 5.8    | -0.3   | 10.11 |
| 28 | 23 | 0.00 | -64.21 | -23.16 | -35.06 | -23.16 | 35.06  | 50.51 |
| 28 | 24 | 0.00 | 5.3    | 1.5    | 3.28   | 1.5    | -3.28  | 4.25  |
| 28 | 25 | 0.00 | -1.45  | -0.63  | -1.29  | -0.63  | 1.29   | 1.44  |
| 28 | 26 | 0.00 | -1.35  | -0.47  | -0.17  | -0.47  | 0.17   | 0.88  |
| 28 | 27 | 0.00 | 4.48   | -4.39  | -5.88  | -4.39  | 5.88   | 6.53  |
| 28 | 28 | 0.00 | -0.69  | 0.62   | -0.16  | 0.62   | 0.16   | 0.66  |
| 28 | 29 | 0.00 | 3.18   | -6.18  | 1.34   | -6.18  | -1.34  | 5.48  |
| 28 | 30 | 0.00 | -1.78  | 0.18   | 2.41   | 0.18   | -2.41  | 2.22  |
| 29 | 0  | 0.00 | 12.69  | 13.98  | 15.18  | 13.98  | -15.18 | 18.37 |
| 29 | 1  | 0.00 | 0.01   | 0.13   | -0.31  | 0.13   | 0.31   | 0.27  |
| 29 | 2  | 0.00 | 0.24   | 0.04   | -0.47  | 0.04   | 0.47   | 0.41  |
| 29 | 3  | 0.00 | 0.69   | 0.55   | 0.51   | 0.55   | -0.51  | 0.73  |
| 29 | 4  | 0.00 | -0.58  | -0.49  | -0.33  | -0.49  | 0.33   | 0.59  |
| 29 | 5  | 0.00 | 0.46   | -0.13  | -0.49  | -0.13  | 0.49   | 0.49  |
| 29 | 6  | 0.00 | -2.58  | -0.78  | 0.69   | -0.78  | -0.69  | 1.72  |
| 29 | 7  | 0.00 | -3.65  | -1.15  | 0.19   | -1.15  | -0.19  | 2.31  |
| 29 | 8  | 0.00 | -2.91  | -0.13  | -1.16  | -0.13  | 1.16   | 1.93  |
| 29 | 9  | 0.00 | -2.91  | 0.29   | -0.68  | 0.29   | 0.68   | 1.79  |
| 29 | 10 | 0.00 | 0.09   | -0.55  | -0.35  | -0.55  | 0.35   | 0.53  |
| 29 | 11 | 0.00 | 0.59   | -0.5   | -0.17  | -0.5   | 0.17   | 0.55  |
| 29 | 12 | 0.00 | -0.17  | 0.03   | 0.35   | 0.03   | -0.35  | 0.30  |
| 29 | 13 | 0.00 | -0.45  | 1.25   | 0.54   | 1.25   | -0.54  | 1.14  |
| 29 | 14 | 0.00 | -0.4   | -0.29  | -0.11  | -0.29  | 0.11   | 0.34  |
| 29 | 15 | 0.00 | -0.03  | -0.03  | -0.1   | -0.03  | 0.1    | 0.09  |
| 29 | 16 | 0.00 | -0.89  | 0.31   | 0.28   | 0.31   | -0.28  | 0.62  |
| 29 | 17 | 0.00 | -0.13  | 0.15   | -0.01  | 0.15   | 0.01   | 0.14  |
| 29 | 18 | 0.00 | -3.02  | 0.43   | 0.39   | 0.43   | -0.39  | 1.81  |
| 29 | 19 | 0.00 | 1.66   | -0.2   | -0.28  | -0.2   | 0.28   | 1.00  |

---

---

|    |    |      |        |        |        |        |        |       |
|----|----|------|--------|--------|--------|--------|--------|-------|
| 29 | 20 | 0.00 | -0.92  | -0.27  | 0.35   | -0.27  | -0.35  | 0.64  |
| 29 | 21 | 0.00 | 1.24   | -0.08  | -0.58  | -0.08  | 0.58   | 0.86  |
| 29 | 22 | 0.00 | -23.04 | 15.15  | 4.58   | 15.15  | -4.58  | 18.55 |
| 29 | 23 | 0.00 | 5.08   | 0.52   | 1.64   | 0.52   | -1.64  | 3.25  |
| 29 | 24 | 0.00 | -7.33  | -2.84  | -5.07  | -2.84  | 5.07   | 6.36  |
| 29 | 25 | 0.00 | 24.66  | 7.59   | 16.92  | 7.59   | -16.92 | 20.78 |
| 29 | 26 | 0.00 | -6.3   | -2.41  | -3.03  | -2.41  | 3.03   | 4.82  |
| 29 | 27 | 0.00 | -24.21 | 3.62   | 8.88   | 3.62   | -8.88  | 16.02 |
| 29 | 28 | 0.00 | -7.11  | -0.44  | -3.19  | -0.44  | 3.19   | 4.87  |
| 29 | 29 | 0.00 | 17.73  | -5.51  | 0.5    | -5.51  | -0.5   | 11.19 |
| 29 | 30 | 0.00 | -81.42 | 13.69  | 36.03  | 13.69  | -36.03 | 56.57 |
| 30 | 0  | 0.00 | -1.13  | -3.88  | -1.97  | -3.88  | 1.97   | 3.61  |
| 30 | 1  | 0.00 | -4.91  | -0.66  | 2.27   | -0.66  | -2.27  | 3.43  |
| 30 | 2  | 0.00 | 2.97   | 1.39   | 0.15   | 1.39   | -0.15  | 2.06  |
| 30 | 3  | 0.00 | 0.87   | 0.34   | -0.64  | 0.34   | 0.64   | 0.78  |
| 30 | 4  | 0.00 | 3.64   | -0.34  | 0.45   | -0.34  | -0.45  | 2.15  |
| 30 | 5  | 0.00 | -0.16  | -0.07  | 0.85   | -0.07  | -0.85  | 0.70  |
| 30 | 6  | 0.00 | -0.07  | -0.08  | -0.5   | -0.08  | 0.5    | 0.42  |
| 30 | 7  | 0.00 | 0.16   | 0      | 0.16   | 0      | -0.16  | 0.16  |
| 30 | 8  | 0.00 | 0.41   | -0.01  | 0.14   | -0.01  | -0.14  | 0.26  |
| 30 | 9  | 0.00 | -0.35  | -0.04  | -0.04  | -0.04  | 0.04   | 0.21  |
| 30 | 10 | 0.00 | -0.07  | -0.64  | -0.66  | -0.64  | 0.66   | 0.75  |
| 30 | 11 | 0.00 | 0.23   | 0.63   | 0.58   | 0.63   | -0.58  | 0.71  |
| 30 | 12 | 0.00 | 0.17   | -0.03  | 0.35   | -0.03  | -0.35  | 0.30  |
| 30 | 13 | 0.00 | 2.44   | -0.49  | 0.85   | -0.49  | -0.85  | 1.62  |
| 30 | 14 | 0.00 | -2.12  | 0.27   | -0.03  | 0.27   | 0.03   | 1.24  |
| 30 | 15 | 0.00 | 2.01   | 0.74   | 1.06   | 0.74   | -1.06  | 1.57  |
| 30 | 16 | 0.00 | 4.39   | -2.29  | -1.05  | -2.29  | 1.05   | 3.26  |
| 30 | 17 | 0.00 | 0.05   | -0.12  | -0.12  | -0.12  | 0.12   | 0.14  |
| 30 | 18 | 0.00 | -2.65  | -0.73  | -0.92  | -0.73  | 0.92   | 1.81  |
| 30 | 19 | 0.00 | -6.02  | -1.72  | -1.6   | -1.72  | 1.6    | 3.97  |
| 30 | 20 | 0.00 | -0.05  | -0.19  | 0.27   | -0.19  | -0.27  | 0.27  |
| 30 | 21 | 0.00 | -2.35  | 1.44   | 0.66   | 1.44   | -0.66  | 1.87  |
| 30 | 22 | 0.00 | 0.82   | 0.01   | 0.23   | 0.01   | -0.23  | 0.51  |
| 30 | 23 | 0.00 | 9.02   | 3.1    | 4.27   | 3.1    | -4.27  | 6.76  |
| 30 | 24 | 0.00 | 4.42   | 1.08   | 2.34   | 1.08   | -2.34  | 3.31  |
| 30 | 25 | 0.00 | -10.88 | -3.51  | -7.74  | -3.51  | 7.74   | 9.36  |
| 30 | 26 | 0.00 | 0.6    | 0.27   | 0.09   | 0.27   | -0.09  | 0.42  |
| 30 | 27 | 0.00 | 60.07  | -12.29 | -20.37 | -12.29 | 20.37  | 39.75 |
| 30 | 28 | 0.00 | -7.7   | 1.34   | -2.59  | 1.34   | 2.59   | 5.04  |
| 30 | 29 | 0.00 | 105.09 | -21.78 | 35.04  | -21.78 | -35.04 | 69.40 |
| 30 | 30 | 0.00 | -0.93  | 0.05   | 8.97   | 0.05   | -8.97  | 7.34  |

---

**Table S10.** The coordinate of Conformer 1 of I-Alq<sub>3</sub> in S<sub>0</sub> state calculated at the level of B3LYP/def2-SVP.

| <b>Coordinates /Angstrom</b> |           |           |           |
|------------------------------|-----------|-----------|-----------|
| <b>Elements</b>              | <b>X</b>  | <b>Y</b>  | <b>Z</b>  |
| O                            | 0.786114  | -0.520289 | 1.430052  |
| Al                           | -3.738151 | 0.541549  | 0.195959  |
| C                            | -2.644534 | -1.787933 | 1.148994  |
| N                            | -5.526014 | -0.176161 | 0.943652  |
| N                            | -2.203910 | 1.530709  | -0.722160 |
| N                            | -3.529488 | -1.210697 | -0.947886 |
| O                            | -3.806181 | 2.059659  | 1.266968  |
| O                            | -4.873217 | 1.189158  | -1.173412 |
| C                            | -2.161675 | -2.774375 | 2.012079  |
| C                            | -3.053953 | -2.211272 | -0.163892 |
| C                            | -6.547800 | 0.188722  | 0.125506  |
| C                            | -5.771532 | -0.862485 | 2.048136  |
| C                            | -2.220681 | 2.821181  | -0.282245 |
| C                            | -1.403563 | 1.188372  | -1.720826 |
| C                            | -3.929677 | -1.472418 | -2.182511 |
| C                            | -3.108236 | 3.072486  | 0.823209  |
| C                            | -6.148943 | 0.945720  | -1.032942 |
| C                            | -2.116018 | -4.124655 | 1.595074  |
| H                            | -1.838207 | -2.491206 | 3.015687  |
| C                            | -2.996221 | -3.566949 | -0.587010 |
| C                            | -7.905638 | -0.147159 | 0.391901  |
| C                            | -7.085862 | -1.241167 | 2.400760  |
| H                            | -4.907989 | -1.113426 | 2.667452  |
| C                            | -1.418089 | 3.841394  | -0.860127 |
| C                            | -0.586742 | 2.138068  | -2.368776 |
| H                            | -1.400596 | 0.141561  | -2.029572 |
| C                            | -3.881784 | -2.783196 | -2.707569 |
| H                            | -4.310300 | -0.624276 | -2.755933 |
| C                            | -3.137705 | 4.372128  | 1.333796  |
| C                            | -7.162098 | 1.340822  | -1.910310 |
| C                            | -2.519564 | -4.536275 | 0.334970  |
| H                            | -1.741062 | -4.869506 | 2.301701  |
| C                            | -3.432181 | -3.822093 | -1.913783 |
| C                            | -8.896892 | 0.278006  | -0.530711 |
| C                            | -8.141312 | -0.889412 | 1.579508  |
| H                            | -7.250970 | -1.807513 | 3.319139  |
| C                            | -0.596529 | 3.452257  | -1.948381 |
| C                            | -1.484430 | 5.148325  | -0.306619 |
| H                            | 0.056560  | 1.815475  | -3.183903 |
| H                            | -4.215578 | -2.961042 | -3.731332 |

|    |           |           |           |
|----|-----------|-----------|-----------|
| C  | -2.328805 | 5.383996  | 0.766471  |
| H  | -3.799304 | 4.589463  | 2.174648  |
| C  | -8.509575 | 1.002981  | -1.647292 |
| H  | -6.894008 | 1.919442  | -2.796476 |
| H  | -2.475697 | -5.587629 | 0.042547  |
| H  | -3.405334 | -4.844862 | -2.300129 |
| H  | -9.945918 | 0.033890  | -0.350726 |
| H  | -9.164946 | -1.175511 | 1.837453  |
| H  | 0.042909  | 4.191709  | -2.434978 |
| H  | -0.876013 | 5.946883  | -0.736360 |
| H  | -2.381090 | 6.390226  | 1.192261  |
| H  | -9.273822 | 1.332438  | -2.357034 |
| Ir | 2.721013  | -0.232223 | 0.024685  |
| C  | 3.031138  | 1.588548  | -0.812040 |
| C  | 4.436239  | -1.044716 | -0.675882 |
| C  | 2.271796  | 2.649455  | -0.236154 |
| C  | 3.925005  | 1.928971  | -1.844328 |
| C  | 1.568571  | -1.007032 | -1.436783 |
| N  | 1.122704  | 0.923364  | 0.942254  |
| N  | 2.162522  | -2.127308 | 0.910946  |
| N  | 4.120474  | 0.364163  | 1.588394  |
| C  | 4.613021  | -1.808045 | -1.847216 |
| C  | 5.599084  | -0.795629 | 0.112725  |
| C  | 2.428952  | 3.977681  | -0.670753 |
| C  | 1.289930  | 2.267067  | 0.785685  |
| C  | 4.065439  | 3.247550  | -2.284989 |
| H  | 4.524413  | 1.142599  | -2.309049 |
| C  | 0.956261  | -2.262340 | -1.139745 |
| C  | 1.344878  | -0.486536 | -2.726817 |
| C  | 0.187997  | 0.452772  | 1.779639  |
| C  | 1.338640  | -2.881045 | 0.133405  |
| C  | 2.602111  | -2.594420 | 2.087767  |
| C  | 5.405736  | -0.008274 | 1.334301  |
| C  | 3.826325  | 1.081158  | 2.682666  |
| C  | 5.866635  | -2.290404 | -2.225813 |
| H  | 3.749162  | -2.021015 | -2.479551 |
| C  | 6.861421  | -1.283656 | -0.276658 |
| C  | 3.322146  | 4.280392  | -1.695855 |
| H  | 1.835150  | 4.777506  | -0.221400 |
| C  | 0.551642  | 3.157044  | 1.580395  |
| H  | 4.767191  | 3.477389  | -3.092608 |
| C  | 0.086645  | -2.885712 | -2.053671 |
| C  | 0.499836  | -1.118745 | -3.639758 |
| H  | 1.852212  | 0.436640  | -3.012432 |

|   |           |           |           |
|---|-----------|-----------|-----------|
| C | -0.599681 | 1.287544  | 2.566258  |
| H | 0.075058  | -0.632115 | 1.814974  |
| C | 0.966213  | -4.166713 | 0.560314  |
| C | 2.252458  | -3.850871 | 2.570648  |
| H | 3.264826  | -1.930849 | 2.647624  |
| C | 6.425394  | 0.368181  | 2.228439  |
| C | 4.790723  | 1.477539  | 3.602706  |
| H | 2.776151  | 1.344268  | 2.818420  |
| C | 7.000377  | -2.028679 | -1.442693 |
| H | 5.965954  | -2.877756 | -3.143872 |
| H | 7.745364  | -1.082497 | 0.333556  |
| H | 3.438651  | 5.311994  | -2.037586 |
| C | -0.387472 | 2.665835  | 2.483222  |
| H | 0.704693  | 4.229908  | 1.478560  |
| C | -0.159878 | -2.309410 | -3.296608 |
| H | -0.395652 | -3.829881 | -1.795286 |
| H | 0.344324  | -0.679685 | -4.630308 |
| H | -1.378891 | 0.859316  | 3.194179  |
| C | 1.421075  | -4.652696 | 1.780205  |
| H | 0.318534  | -4.775108 | -0.067273 |
| H | 2.635428  | -4.193962 | 3.533147  |
| C | 6.120060  | 1.111836  | 3.362288  |
| H | 7.455616  | 0.077843  | 2.024451  |
| H | 4.503532  | 2.061467  | 4.478575  |
| H | 7.981626  | -2.404908 | -1.742035 |
| H | -0.974182 | 3.355704  | 3.091352  |
| H | -0.839539 | -2.792936 | -4.001925 |
| H | 1.132295  | -5.652175 | 2.115054  |
| H | 6.912009  | 1.406920  | 4.055196  |

**Table S11.** The coordinate of Conformer 2 of I-Alq<sub>3</sub> in S<sub>0</sub> state calculated at the level of B3LYP/def2-SVP.

| <b>Coordinates /Angstrom</b> |          |           |           |
|------------------------------|----------|-----------|-----------|
| <b>Elements</b>              | <b>X</b> | <b>Y</b>  | <b>Z</b>  |
| O                            | 2.484813 | -0.689939 | -1.182882 |
| Al                           | 3.637718 | 0.605678  | -0.431210 |
| C                            | 3.054082 | -1.617871 | -1.909112 |
| N                            | 2.138342 | 1.748631  | 0.369363  |
| N                            | 3.785929 | -0.627888 | 1.257148  |
| N                            | 5.070454 | -0.526352 | -1.375837 |
| O                            | 4.949000 | 1.570249  | 0.524748  |
| O                            | 3.589914 | 1.861948  | -1.800563 |

|   |           |           |           |
|---|-----------|-----------|-----------|
| C | 2.400621  | -2.663092 | -2.565870 |
| C | 4.487312  | -1.562524 | -2.032588 |
| C | 2.065823  | 2.903669  | -0.354729 |
| C | 1.397310  | 1.610668  | 1.458867  |
| C | 4.708675  | -0.123004 | 2.119653  |
| C | 3.190678  | -1.779090 | 1.526204  |
| C | 6.382196  | -0.362907 | -1.418425 |
| C | 5.315209  | 1.108051  | 1.688628  |
| C | 2.884544  | 2.930951  | -1.538925 |
| C | 3.140690  | -3.613134 | -3.309001 |
| H | 1.315403  | -2.742994 | -2.493259 |
| C | 5.230641  | -2.516838 | -2.780980 |
| C | 1.235472  | 3.995003  | 0.017841  |
| C | 0.546489  | 2.643524  | 1.907158  |
| H | 1.466424  | 0.665141  | 2.000713  |
| C | 5.064298  | -0.767155 | 3.338533  |
| C | 3.500990  | -2.509354 | 2.695486  |
| H | 2.451286  | -2.124035 | 0.801382  |
| C | 7.207527  | -1.257831 | -2.136152 |
| H | 6.780049  | 0.496495  | -0.873572 |
| C | 6.255606  | 1.686370  | 2.546370  |
| C | 2.846033  | 4.092257  | -2.314605 |
| C | 4.520691  | -3.563599 | -3.427677 |
| H | 2.593154  | -4.417953 | -3.808056 |
| C | 6.638023  | -2.324295 | -2.807850 |
| C | 1.226131  | 5.151839  | -0.806670 |
| C | 0.466625  | 3.823694  | 1.197400  |
| H | -0.047707 | 2.483893  | 2.803099  |
| C | 4.420134  | -2.006637 | 3.595904  |
| C | 6.027673  | -0.143375 | 4.172431  |
| H | 3.005246  | -3.463913 | 2.877826  |
| H | 8.286694  | -1.095053 | -2.150186 |
| C | 6.591406  | 1.057430  | 3.766603  |
| H | 6.727269  | 2.625858  | 2.251793  |
| C | 2.024444  | 5.179633  | -1.938523 |
| H | 3.460948  | 4.139792  | -3.215583 |
| H | 5.065843  | -4.310599 | -4.008394 |
| H | 7.263929  | -3.025916 | -3.366535 |
| H | 0.596990  | 6.001937  | -0.534626 |
| H | -0.200957 | 4.623255  | 1.527441  |
| H | 4.662899  | -2.558549 | 4.508312  |
| H | 6.315159  | -0.613547 | 5.115128  |
| H | 7.332985  | 1.538912  | 4.410392  |
| H | 2.021963  | 6.072343  | -2.570704 |

|    |           |           |           |
|----|-----------|-----------|-----------|
| Ir | -2.605275 | -0.282604 | 0.110825  |
| C  | -4.194862 | -1.224769 | 0.941584  |
| C  | -1.465713 | -0.512426 | 1.756645  |
| C  | -5.318385 | -1.402761 | 0.080060  |
| C  | -4.320062 | -1.714439 | 2.257442  |
| C  | -3.239220 | 1.595814  | 0.536380  |
| N  | -3.982999 | -0.319769 | -1.580776 |
| N  | -1.192964 | 0.900854  | -1.042319 |
| N  | -1.631269 | -2.170892 | -0.328646 |
| C  | -1.458538 | 0.291158  | 2.915132  |
| C  | -0.657406 | -1.688602 | 1.790886  |
| C  | -6.492640 | -2.034305 | 0.534395  |
| C  | -5.184802 | -0.890318 | -1.286919 |
| C  | -5.486645 | -2.338513 | 2.700938  |
| H  | -3.487110 | -1.596692 | 2.952441  |
| C  | -2.593139 | 2.633076  | -0.198866 |
| C  | -4.224220 | 1.987438  | 1.462223  |
| C  | -3.753907 | 0.182680  | -2.803449 |
| C  | -1.556283 | 2.208666  | -1.147021 |
| C  | -0.225748 | 0.402698  | -1.825569 |
| C  | -0.735645 | -2.563671 | 0.619056  |
| C  | -1.808416 | -2.901816 | -1.437816 |
| C  | -0.675462 | -0.022322 | 4.025978  |
| H  | -2.092118 | 1.179552  | 2.941226  |
| C  | 0.122689  | -2.005121 | 2.918420  |
| C  | -6.581892 | -2.502640 | 1.840680  |
| H  | -7.347066 | -2.162499 | -0.134676 |
| C  | -6.183279 | -0.952615 | -2.277063 |
| H  | -5.547055 | -2.702530 | 3.731205  |
| C  | -2.921077 | 3.985400  | 0.005107  |
| C  | -4.544762 | 3.332367  | 1.664155  |
| H  | -4.745991 | 1.220405  | 2.039423  |
| C  | -4.700916 | 0.145579  | -3.820906 |
| H  | -2.772151 | 0.629577  | -2.965796 |
| C  | -0.972139 | 3.015872  | -2.135820 |
| C  | 0.402521  | 1.158226  | -2.809069 |
| H  | 0.061332  | -0.630972 | -1.645333 |
| C  | 0.016557  | -3.735912 | 0.419931  |
| C  | -1.094892 | -4.069567 | -1.688197 |
| H  | -2.552306 | -2.524376 | -2.143049 |
| C  | 0.131891  | -1.170565 | 4.031056  |
| H  | -0.694817 | 0.628910  | 4.905385  |
| H  | 0.710558  | -2.923688 | 2.939748  |
| H  | -7.494859 | -2.991163 | 2.189731  |



|   |           |           |           |
|---|-----------|-----------|-----------|
| C | -5.943496 | -0.436001 | -3.544635 |
| H | -7.146266 | -1.405505 | -2.043332 |
| C | -3.892553 | 4.339474  | 0.938470  |
| H | -2.401537 | 4.767361  | -0.555104 |
| H | -5.312200 | 3.602518  | 2.395978  |
| H | -4.467628 | 0.566788  | -4.800042 |
| C | -0.001522 | 2.485099  | -2.981006 |
| H | -1.284480 | 4.053669  | -2.240760 |
| H | 1.206193  | 0.717884  | -3.398261 |
| C | -0.159852 | -4.489474 | -0.734683 |
| H | 0.737115  | -4.051103 | 1.174216  |
| H | -1.269755 | -4.632774 | -2.606265 |
| H | 0.743054  | -1.418948 | 4.901717  |
| H | -6.719149 | -0.483360 | -4.313090 |
| H | -4.141831 | 5.390894  | 1.102137  |
| H | 0.457069  | 3.109967  | -3.748369 |
| H | 0.430201  | -5.394724 | -0.895032 |

**Table S12.** The coordinate of Conformer 3 of I-Alq<sub>3</sub> in S<sub>0</sub> state calculated at the level of B3LYP/def2-SVP.

| <b>Coordinates /Angstrom</b> |          |           |           |
|------------------------------|----------|-----------|-----------|
| <b>Elements</b>              | <b>X</b> | <b>Y</b>  | <b>Z</b>  |
| O                            | 4.496861 | 0.655067  | 1.531017  |
| Al                           | 3.421309 | 0.159198  | 0.062848  |
| C                            | 5.791531 | 0.646913  | 1.376140  |
| N                            | 3.354663 | -1.776609 | 0.719178  |
| N                            | 3.459763 | 2.093702  | -0.661952 |
| N                            | 5.341963 | -0.177858 | -0.783759 |
| O                            | 1.862934 | 0.708963  | 0.881405  |
| O                            | 2.712494 | -0.610239 | -1.514025 |
| C                            | 6.733709 | 1.042814  | 2.330942  |
| C                            | 6.299538 | 0.184654  | 0.109725  |
| C                            | 2.984984 | -2.598272 | -0.296847 |
| C                            | 3.677383 | -2.277827 | 1.899997  |
| C                            | 2.508305 | 2.794326  | 0.015959  |
| C                            | 4.267882 | 2.723760  | -1.501655 |
| C                            | 5.693472 | -0.619815 | -1.982805 |
| C                            | 1.659918 | 2.001104  | 0.869670  |
| C                            | 2.632691 | -1.917004 | -1.516762 |
| C                            | 8.116073 | 0.978893  | 2.043220  |
| H                            | 6.377243 | 1.402044  | 3.298509  |
| C                            | 7.695227 | 0.119156  | -0.177829 |

|    |           |           |           |
|----|-----------|-----------|-----------|
| C  | 2.972430  | -4.015907 | -0.176754 |
| C  | 3.661760  | -3.672871 | 2.130223  |
| H  | 3.957675  | -1.556152 | 2.670832  |
| C  | 2.356015  | 4.208148  | -0.110759 |
| C  | 4.179779  | 4.117243  | -1.713979 |
| H  | 5.016487  | 2.119707  | -2.019792 |
| C  | 7.051277  | -0.728096 | -2.362734 |
| H  | 4.880678  | -0.887779 | -2.661354 |
| C  | 0.684746  | 2.681678  | 1.601405  |
| C  | 2.268716  | -2.715654 | -2.603925 |
| C  | 8.609920  | 0.530764  | 0.825814  |
| H  | 8.821310  | 1.297828  | 2.816474  |
| C  | 8.041832  | -0.360359 | -1.469641 |
| C  | 2.613009  | -4.783098 | -1.317339 |
| C  | 3.324517  | -4.532736 | 1.099891  |
| H  | 3.926129  | -4.054193 | 3.118307  |
| C  | 3.237775  | 4.852878  | -1.016101 |
| C  | 1.343854  | 4.848277  | 0.649343  |
| H  | 4.865074  | 4.596085  | -2.416293 |
| H  | 7.299642  | -1.099315 | -3.359148 |
| C  | 0.543867  | 4.081240  | 1.484135  |
| H  | 0.023128  | 2.107261  | 2.246319  |
| C  | 2.272091  | -4.125913 | -2.489504 |
| H  | 1.989086  | -2.233179 | -3.542979 |
| H  | 9.683857  | 0.491526  | 0.630103  |
| H  | 9.097252  | -0.434872 | -1.748137 |
| H  | 2.601018  | -5.873663 | -1.255717 |
| H  | 3.323404  | -5.615250 | 1.258431  |
| H  | 3.163049  | 5.935454  | -1.156265 |
| H  | 1.206836  | 5.929055  | 0.566718  |
| H  | -0.245900 | 4.567073  | 2.062910  |
| H  | 1.986083  | -4.715949 | -3.365052 |
| Ir | -2.791993 | -0.126070 | 0.113371  |
| C  | -1.514348 | -0.637098 | 1.597899  |
| C  | -3.253184 | 1.735245  | 0.782139  |
| C  | -0.766467 | -1.833431 | 1.379926  |
| C  | -1.297169 | 0.033028  | 2.818593  |
| C  | -4.411681 | -1.039458 | 0.924945  |
| N  | -2.045217 | -2.026441 | -0.625924 |
| N  | -4.268066 | 0.158352  | -1.476315 |
| N  | -1.285251 | 1.066673  | -0.906856 |
| C  | -4.198795 | 2.094092  | 1.764091  |
| C  | -2.549524 | 2.799720  | 0.141103  |
| C  | 0.195962  | -2.270564 | 2.310277  |

|   |           |           |           |
|---|-----------|-----------|-----------|
| C | -1.088343 | -2.588819 | 0.165490  |
| C | -0.349999 | -0.411031 | 3.742305  |
| H | -1.885339 | 0.926827  | 3.041108  |
| C | -5.594387 | -1.026192 | 0.123057  |
| C | -4.504196 | -1.672729 | 2.182759  |
| C | -2.441567 | -2.637917 | -1.751593 |
| C | -5.494459 | -0.358476 | -1.180571 |
| C | -4.063688 | 0.796164  | -2.638757 |
| C | -1.509546 | 2.408801  | -0.820832 |
| C | -0.279909 | 0.595230  | -1.658113 |
| C | -4.442365 | 3.429345  | 2.094790  |
| H | -4.753142 | 1.305107  | 2.278506  |
| C | -2.805379 | 4.144188  | 0.473648  |
| C | 0.415537  | -1.558047 | 3.484109  |
| H | 0.780266  | -3.174018 | 2.121156  |
| C | -0.517963 | -3.819196 | -0.209132 |
| H | -0.197579 | 0.144694  | 4.672975  |
| C | -6.790565 | -1.617488 | 0.578908  |
| C | -5.692217 | -2.254871 | 2.627543  |
| H | -3.623022 | -1.702022 | 2.827646  |
| C | -1.909570 | -3.852174 | -2.174341 |
| H | -3.218472 | -2.125026 | -2.323724 |
| C | -6.544774 | -0.223146 | -2.110403 |
| C | -5.061953 | 0.959108  | -3.594387 |
| H | -3.056955 | 1.188275  | -2.799090 |
| C | -0.745828 | 3.291878  | -1.603729 |
| C | 0.532670  | 1.423520  | -2.426599 |
| H | -0.118152 | -0.483352 | -1.630268 |
| C | -3.749210 | 4.463207  | 1.447014  |
| H | -5.181706 | 3.671226  | 2.865126  |
| H | -2.250699 | 4.949165  | -0.015278 |
| H | 1.169944  | -1.895042 | 4.200063  |
| C | -0.925198 | -4.450175 | -1.378415 |
| H | 0.249016  | -4.271996 | 0.416284  |
| C | -6.844791 | -2.230565 | 1.826539  |
| H | -7.690937 | -1.598792 | -0.041099 |
| H | -5.725475 | -2.734435 | 3.611190  |
| H | -2.262586 | -4.314136 | -3.098175 |
| C | -6.330583 | 0.435178  | -3.316294 |
| H | -7.528120 | -0.632032 | -1.878092 |
| H | -4.848446 | 1.486950  | -4.525684 |
| C | 0.274270  | 2.797421  | -2.411283 |
| H | -0.936561 | 4.363068  | -1.553807 |
| H | 1.364257  | 0.988081  | -2.979165 |

|   |           |           |           |
|---|-----------|-----------|-----------|
| H | -3.940836 | 5.507899  | 1.706367  |
| H | -0.471339 | -5.399584 | -1.670749 |
| H | -7.774789 | -2.686076 | 2.176855  |
| H | -7.146779 | 0.542975  | -4.035718 |
| H | 0.888158  | 3.484022  | -2.999925 |

**Table S13.** The coordinate of Conformer 4 of I-Alq<sub>3</sub> in S<sub>0</sub> state calculated at the level of B3LYP/def2-SVP.

| <b>Coordinates /Angstrom</b> |          |           |           |
|------------------------------|----------|-----------|-----------|
| <b>Elements</b>              | <b>X</b> | <b>Y</b>  | <b>Z</b>  |
| O                            | 2.572197 | -0.507336 | -1.327459 |
| Al                           | 3.987729 | 0.474470  | -0.524138 |
| C                            | 2.922712 | -1.366165 | -2.251667 |
| N                            | 2.626023 | 1.584518  | 0.514386  |
| N                            | 4.072224 | -1.003995 | 0.964432  |
| N                            | 5.125552 | -0.675954 | -1.780416 |
| O                            | 5.491999 | 1.091758  | 0.421183  |
| O                            | 3.999661 | 1.929127  | -1.680602 |
| C                            | 2.058237 | -2.177448 | -2.989119 |
| C                            | 4.330241 | -1.487464 | -2.526530 |
| C                            | 2.493577 | 2.792427  | -0.102044 |
| C                            | 1.874567 | 1.299268  | 1.567436  |
| C                            | 5.100549 | -0.744286 | 1.814240  |
| C                            | 3.314373 | -2.073635 | 1.150414  |
| C                            | 6.437193 | -0.686812 | -1.951341 |
| C                            | 5.857574 | 0.434217  | 1.487535  |
| C                            | 3.288935 | 2.957255  | -1.292377 |
| C                            | 2.570739 | -3.069770 | -3.960127 |
| H                            | 0.984744 | -2.109912 | -2.804546 |
| C                            | 4.844932 | -2.381927 | -3.505560 |
| C                            | 1.593946 | 3.793961  | 0.357435  |
| C                            | 0.935847 | 2.216275  | 2.081133  |
| H                            | 1.999202 | 0.314855  | 2.022114  |
| C                            | 5.412228 | -1.571003 | 2.931222  |
| C                            | 3.552890 | -2.963468 | 2.222354  |
| H                            | 2.498275 | -2.222031 | 0.442002  |
| C                            | 7.043686 | -1.539143 | -2.901321 |
| H                            | 7.012173 | -0.001257 | -1.324167 |
| C                            | 6.920975 | 0.759937  | 2.333490  |
| C                            | 3.201870 | 4.185916  | -1.949855 |
| C                            | 3.925436 | -3.186775 | -4.229347 |
| H                            | 1.863231 | -3.687395 | -4.520856 |

|    |           |           |           |
|----|-----------|-----------|-----------|
| C  | 6.256346  | -2.378243 | -3.668658 |
| C  | 1.534638  | 5.021984  | -0.352104 |
| C  | 0.798075  | 3.452967  | 1.481640  |
| H  | 0.323363  | 1.929168  | 2.932822  |
| C  | 4.587685  | -2.713848 | 3.105013  |
| C  | 6.502630  | -1.199175 | 3.758984  |
| H  | 2.915170  | -3.839870 | 2.341550  |
| H  | 8.128647  | -1.521994 | -3.018742 |
| C  | 7.222901  | -0.055131 | 3.447996  |
| H  | 7.511399  | 1.652136  | 2.116409  |
| C  | 2.337812  | 5.196121  | -1.467494 |
| H  | 3.801031  | 4.343217  | -2.848770 |
| H  | 4.292722  | -3.881278 | -4.987646 |
| H  | 6.711745  | -3.042650 | -4.408459 |
| H  | 0.853984  | 5.806441  | -0.015568 |
| H  | 0.064102  | 4.169607  | 1.859649  |
| H  | 4.781542  | -3.392434 | 3.940435  |
| H  | 6.761490  | -1.812794 | 4.624233  |
| H  | 8.062741  | 0.232105  | 4.086986  |
| H  | 2.293281  | 6.144032  | -2.011704 |
| Ir | -2.723595 | -0.065250 | 0.234414  |
| C  | -4.194861 | -1.298235 | 0.883467  |
| C  | -1.956758 | 0.208082  | 2.077500  |
| C  | -5.016564 | -1.860329 | -0.138738 |
| C  | -4.487486 | -1.669404 | 2.210933  |
| C  | -3.847998 | 1.618845  | 0.236267  |
| N  | -3.642872 | -0.630988 | -1.660903 |
| N  | -1.388171 | 1.309146  | -0.771800 |
| N  | -1.343420 | -1.732127 | 0.345436  |
| C  | -2.291665 | 1.215551  | 3.007171  |
| C  | -1.023598 | -0.782840 | 2.510128  |
| C  | -6.069326 | -2.741783 | 0.175511  |
| C  | -4.710848 | -1.464604 | -1.517271 |
| C  | -5.532353 | -2.542942 | 2.515320  |
| H  | -3.886669 | -1.258976 | 3.024637  |
| C  | -3.270887 | 2.735949  | -0.435638 |
| C  | -5.112321 | 1.806564  | 0.825461  |
| C  | -3.280077 | -0.197988 | -2.877313 |
| C  | -1.960787 | 2.510518  | -1.060244 |
| C  | -0.207231 | 0.970935  | -1.311292 |
| C  | -0.732177 | -1.856329 | 1.555548  |
| C  | -1.142930 | -2.644207 | -0.614745 |
| C  | -1.737866 | 1.244239  | 4.287123  |
| H  | -3.012605 | 1.982999  | 2.719584  |

|   |           |           |           |
|---|-----------|-----------|-----------|
| C | -0.449598 | -0.734456 | 3.795480  |
| C | -6.330555 | -3.085309 | 1.497684  |
| H | -6.692551 | -3.165250 | -0.615984 |
| C | -5.428115 | -1.874180 | -2.657078 |
| H | -5.731028 | -2.806412 | 3.558734  |
| C | -3.937960 | 3.973344  | -0.492447 |
| C | -5.770350 | 3.036924  | 0.765243  |
| H | -5.584232 | 0.971138  | 1.347412  |
| C | -3.948295 | -0.572667 | -4.037986 |
| H | -2.421549 | 0.474713  | -2.913396 |
| C | -1.318324 | 3.389279  | -1.948582 |
| C | 0.460886  | 1.789088  | -2.216357 |
| H | 0.224865  | 0.016541  | -1.009859 |
| C | 0.081982  | -2.974977 | 1.806262  |
| C | -0.324327 | -3.754442 | -0.435632 |
| H | -1.671833 | -2.469838 | -1.554575 |
| C | -0.803346 | 0.274283  | 4.686670  |
| H | -2.027605 | 2.035224  | 4.985507  |
| H | 0.273387  | -1.492234 | 4.108562  |
| H | -7.148432 | -3.769090 | 1.737510  |
| C | -5.047766 | -1.430195 | -3.917899 |
| H | -6.286516 | -2.535779 | -2.544450 |
| C | -5.184340 | 4.128454  | 0.108527  |
| H | -3.477956 | 4.826493  | -0.998086 |
| H | -6.750987 | 3.150755  | 1.237395  |
| H | -3.616342 | -0.194586 | -5.006188 |
| C | -0.114576 | 3.021619  | -2.541109 |
| H | -1.779975 | 4.347354  | -2.187433 |
| H | 1.412565  | 1.460440  | -2.630857 |
| C | 0.286580  | -3.924944 | 0.811397  |
| H | 0.546730  | -3.091256 | 2.784407  |
| H | -0.182263 | -4.469229 | -1.247163 |
| H | -0.361544 | 0.306576  | 5.685331  |
| H | -5.606462 | -1.745331 | -4.802739 |
| H | -5.697950 | 5.092295  | 0.068951  |
| H | 0.385625  | 3.696378  | -3.237737 |
| H | 0.918818  | -4.796057 | 1.001536  |

**Table S14.** The coordinate of Conformer 5 of I-Alq<sub>3</sub> in S<sub>0</sub> state calculated at the level of B3LYP/def2-SVP.

| Elements | Coordinates /Angstrom |   |   |
|----------|-----------------------|---|---|
|          | X                     | Y | Z |

|    |          |           |           |
|----|----------|-----------|-----------|
| O  | 4.934325 | -0.156830 | -1.535325 |
| Al | 4.556745 | -0.074906 | 0.306089  |
| C  | 5.631787 | 0.819007  | -2.051834 |
| N  | 2.804635 | 0.918587  | 0.001167  |
| N  | 6.262336 | -1.114938 | 0.827175  |
| N  | 5.639617 | 1.706086  | 0.127308  |
| O  | 3.774142 | -1.771238 | 0.355866  |
| O  | 4.226652 | 0.362890  | 2.109678  |
| C  | 6.017864 | 0.937890  | -3.389607 |
| C  | 6.034635 | 1.875827  | -1.161265 |
| C  | 2.318309 | 1.368569  | 1.189892  |
| C  | 2.118557 | 1.125424  | -1.114595 |
| C  | 5.944657 | -2.432546 | 0.954136  |
| C  | 7.504502 | -0.714020 | 1.043949  |
| C  | 5.940882 | 2.616837  | 1.040647  |
| C  | 4.565990 | -2.755777 | 0.689977  |
| C  | 3.124554 | 1.038357  | 2.334390  |
| C  | 6.764469 | 2.058184  | -3.821204 |
| H  | 5.729985 | 0.153234  | -4.091846 |
| C  | 6.783773 | 3.006282  | -1.597471 |
| C  | 1.095858 | 2.082653  | 1.297149  |
| C  | 0.889932 | 1.817130  | -1.104465 |
| H  | 2.550703 | 0.720692  | -2.032437 |
| C  | 6.900386 | -3.422557 | 1.324451  |
| C  | 8.524233 | -1.619699 | 1.408986  |
| H  | 7.709139 | 0.352729  | 0.931050  |
| C  | 6.676796 | 3.775687  | 0.705883  |
| H  | 5.593862 | 2.415603  | 2.056548  |
| C  | 4.190025 | -4.094566 | 0.818496  |
| C  | 2.662424 | 1.464631  | 3.581208  |
| C  | 7.149442 | 3.080332  | -2.966191 |
| H  | 7.046358 | 2.116113  | -4.876377 |
| C  | 7.095115 | 3.967162  | -0.598800 |
| C  | 0.666154 | 2.495001  | 2.586352  |
| C  | 0.385005 | 2.298284  | 0.089264  |
| H  | 0.335483 | 1.945588  | -2.033548 |
| C  | 8.223976 | -2.961513 | 1.549614  |
| C  | 6.468184 | -4.769249 | 1.439824  |
| H  | 9.535849 | -1.245879 | 1.576865  |
| H  | 6.905361 | 4.506765  | 1.483512  |
| C  | 5.139534 | -5.073630 | 1.189075  |
| H  | 3.151504 | -4.370983 | 0.626063  |
| C  | 1.447904 | 2.185074  | 3.687021  |
| H  | 3.249969 | 1.225098  | 4.470023  |

|    |           |           |           |
|----|-----------|-----------|-----------|
| H  | 7.723603  | 3.935114  | -3.329453 |
| H  | 7.666169  | 4.858723  | -0.873037 |
| H  | -0.275724 | 3.037726  | 2.687813  |
| H  | -0.563828 | 2.832883  | 0.109542  |
| H  | 8.999462  | -3.677874 | 1.834934  |
| H  | 7.182948  | -5.544633 | 1.723044  |
| H  | 4.805966  | -6.111381 | 1.278265  |
| H  | 1.116484  | 2.498467  | 4.681313  |
| Ir | -3.393204 | -0.176714 | -0.265038 |
| C  | -5.153095 | -0.143337 | -1.262393 |
| C  | -3.039596 | 1.795998  | -0.482241 |
| C  | -5.844823 | -1.390379 | -1.322508 |
| C  | -5.770327 | 0.956832  | -1.891155 |
| C  | -2.256565 | -0.736510 | -1.847019 |
| N  | -4.020876 | -2.246414 | -0.039414 |
| N  | -1.489066 | -0.553680 | 0.718859  |
| N  | -4.309117 | 0.603430  | 1.536894  |
| C  | -2.510309 | 2.454571  | -1.611805 |
| C  | -3.407234 | 2.615340  | 0.626779  |
| C  | -7.081571 | -1.506676 | -1.986200 |
| C  | -5.194816 | -2.530612 | -0.669736 |
| C  | -6.994732 | 0.833943  | -2.548829 |
| H  | -5.274742 | 1.929298  | -1.869667 |
| C  | -0.918509 | -1.112759 | -1.530520 |
| C  | -2.628403 | -0.772122 | -3.204142 |
| C  | -3.330218 | -3.216233 | 0.577918  |
| C  | -0.539126 | -1.064036 | -0.113383 |
| C  | -1.247942 | -0.449002 | 2.034375  |
| C  | -4.087550 | 1.933446  | 1.733282  |
| C  | -4.966979 | -0.118729 | 2.454664  |
| C  | -2.311558 | 3.834965  | -1.630072 |
| H  | -2.250384 | 1.863450  | -2.492131 |
| C  | -3.180251 | 4.005534  | 0.613370  |
| C  | -7.658547 | -0.400697 | -2.600766 |
| H  | -7.601055 | -2.467343 | -2.023621 |
| C  | -5.684422 | -3.849843 | -0.659409 |
| H  | -7.441743 | 1.709981  | -3.028901 |
| C  | -0.009125 | -1.487535 | -2.537243 |
| C  | -1.722307 | -1.144254 | -4.200188 |
| H  | -3.647126 | -0.493536 | -3.483370 |
| C  | -3.765913 | -4.535905 | 0.621509  |
| H  | -2.393129 | -2.911804 | 1.047911  |
| C  | 0.687942  | -1.496768 | 0.411832  |
| C  | -0.053015 | -0.862784 | 2.611708  |



|   |           |           |           |
|---|-----------|-----------|-----------|
| H | -2.047135 | -0.012526 | 2.636330  |
| C | -4.530937 | 2.541961  | 2.921246  |
| C | -5.432206 | 0.429405  | 3.645433  |
| H | -5.115602 | -1.173576 | 2.212219  |
| C | -2.625667 | 4.617457  | -0.507137 |
| H | -1.896920 | 4.312326  | -2.523121 |
| H | -3.453775 | 4.620715  | 1.474385  |
| H | -8.617708 | -0.494587 | -3.115775 |
| C | -4.971915 | -4.853637 | -0.014179 |
| H | -6.620213 | -4.081051 | -1.167668 |
| C | -0.406451 | -1.500348 | -3.871702 |
| H | 1.016956  | -1.760833 | -2.279143 |
| H | -2.042299 | -1.156653 | -5.246677 |
| H | -3.169725 | -5.292206 | 1.134425  |
| C | 0.934076  | -1.396377 | 1.777426  |
| H | 1.472101  | -1.886804 | -0.233812 |
| H | 0.109194  | -0.739633 | 3.682746  |
| C | -5.200624 | 1.790027  | 3.880452  |
| H | -4.350364 | 3.604600  | 3.083116  |
| H | -5.963420 | -0.194842 | 4.365738  |
| H | -2.454818 | 5.696477  | -0.517111 |
| H | -5.349307 | -5.879240 | -0.010333 |
| H | 0.302040  | -1.786832 | -4.652849 |
| H | 1.902163  | -1.713670 | 2.167289  |
| H | -5.545879 | 2.260673  | 4.804304  |

**Table S15.** The coordinate of Conformer 1 of I-Al(qBr<sub>2</sub>)<sub>3</sub> in S<sub>0</sub> state calculated at the level of B3LYP/def2-SVP.

| <b>Coordinates /Angstrom</b> |           |           |           |
|------------------------------|-----------|-----------|-----------|
| <b>Elements</b>              | <b>X</b>  | <b>Y</b>  | <b>Z</b>  |
| Al                           | -3.290452 | -0.179567 | 0.092656  |
| N                            | -3.904817 | -1.787683 | 1.219778  |
| N                            | -2.435648 | 1.379730  | -0.915769 |
| C                            | -4.735812 | -1.860229 | 2.246955  |
| C                            | -3.235360 | -2.900811 | 0.806461  |
| N                            | -4.557037 | 1.119354  | 1.132138  |
| O                            | -4.759344 | -0.209508 | -1.077821 |
| O                            | -1.961005 | 0.217177  | 1.355283  |
| O                            | -2.319140 | -1.486221 | -0.826878 |
| C                            | -2.760396 | 1.911485  | -2.084918 |
| C                            | -1.366503 | 1.853416  | -0.217027 |
| C                            | -4.954355 | -3.066631 | 2.942552  |

|    |           |           |           |
|----|-----------|-----------|-----------|
| H  | -5.244562 | -0.939542 | 2.539161  |
| C  | -3.377143 | -4.159928 | 1.460476  |
| C  | -2.374415 | -2.688469 | -0.327550 |
| C  | -4.351499 | 1.765138  | 2.270728  |
| C  | -5.713494 | 1.298756  | 0.440329  |
| C  | -5.780170 | 0.538720  | -0.779958 |
| C  | -1.139037 | 1.180264  | 1.031496  |
| C  | -2.025615 | 2.985597  | -2.628823 |
| H  | -3.619894 | 1.470340  | -2.595877 |
| C  | -0.548399 | 2.913525  | -0.704797 |
| C  | -4.275562 | -4.206737 | 2.555904  |
| H  | -5.650801 | -3.083789 | 3.782194  |
| C  | -2.602062 | -5.241933 | 0.956392  |
| C  | -1.647326 | -3.800862 | -0.764281 |
| C  | -5.321269 | 2.645739  | 2.796884  |
| H  | -3.399207 | 1.571198  | 2.770911  |
| C  | -6.747553 | 2.168903  | 0.890723  |
| C  | -6.943476 | 0.704046  | -1.540599 |
| C  | -0.056768 | 1.636154  | 1.786930  |
| C  | -0.927733 | 3.479317  | -1.946207 |
| H  | -2.325137 | 3.407852  | -3.589325 |
| C  | 0.569309  | 3.277029  | 0.095846  |
| H  | -4.418831 | -5.151350 | 3.083645  |
| C  | -1.762718 | -5.056877 | -0.126356 |
| C  | -6.507646 | 2.845995  | 2.114149  |
| H  | -5.121658 | 3.162486  | 3.736928  |
| C  | -7.903867 | 2.272957  | 0.067153  |
| C  | -7.987801 | 1.557613  | -1.114691 |
| C  | 0.794102  | 2.659265  | 1.311063  |
| H  | -0.333184 | 4.297779  | -2.356011 |
| H  | -1.168148 | -5.890298 | -0.501225 |
| H  | -7.269613 | 3.524728  | 2.502009  |
| H  | -8.875264 | 1.650276  | -1.741661 |
| H  | 1.654327  | 2.945726  | 1.912228  |
| Br | 1.801921  | 4.599769  | -0.510807 |
| Br | -9.348402 | 3.408780  | 0.580516  |
| Br | -2.707404 | -6.962458 | 1.775231  |
| Br | 0.281004  | 0.852810  | 3.478673  |
| Br | -7.104656 | -0.224674 | -3.185861 |
| Br | -0.465478 | -3.623270 | -2.237883 |
| Ir | 4.558856  | 0.220549  | -0.089914 |
| N  | 2.771060  | 0.714685  | -1.222731 |
| N  | 4.922405  | -1.534330 | -1.335850 |
| N  | 5.816921  | 1.612788  | -1.174854 |

|   |           |           |           |
|---|-----------|-----------|-----------|
| C | 2.730447  | 1.506569  | -2.303854 |
| H | 3.607620  | 2.133677  | -2.472157 |
| C | 1.651567  | 1.517702  | -3.181095 |
| H | 1.667507  | 2.166403  | -4.058431 |
| C | 0.567719  | 0.676104  | -2.904039 |
| H | -0.292970 | 0.636061  | -3.574985 |
| C | 0.580569  | -0.101180 | -1.752668 |
| H | -0.265859 | -0.744463 | -1.520741 |
| C | 1.706592  | -0.076041 | -0.907750 |
| C | 1.878171  | -0.896029 | 0.292964  |
| C | 0.827790  | -1.659303 | 0.833138  |
| H | -0.159663 | -1.625502 | 0.380041  |
| C | 1.038565  | -2.434409 | 1.967580  |
| H | 0.217109  | -3.019037 | 2.388569  |
| C | 2.304997  | -2.439821 | 2.569267  |
| H | 2.476842  | -3.043909 | 3.465563  |
| C | 3.350541  | -1.678873 | 2.039452  |
| H | 4.328822  | -1.699190 | 2.525047  |
| C | 3.173763  | -0.889593 | 0.888199  |
| C | 4.199500  | -1.912808 | -2.399942 |
| H | 3.394078  | -1.240936 | -2.700824 |
| C | 4.441990  | -3.094143 | -3.091773 |
| H | 3.824543  | -3.361423 | -3.950729 |
| C | 5.481119  | -3.917935 | -2.644394 |
| H | 5.702632  | -4.859437 | -3.153248 |
| C | 6.227661  | -3.529190 | -1.538357 |
| H | 7.034205  | -4.163145 | -1.170985 |
| C | 5.937613  | -2.319582 | -0.879456 |
| C | 6.646521  | -1.805146 | 0.296112  |
| C | 7.749230  | -2.473624 | 0.862971  |
| H | 8.111560  | -3.409535 | 0.430446  |
| C | 8.393451  | -1.950797 | 1.978907  |
| H | 9.248383  | -2.472550 | 2.415893  |
| C | 7.932634  | -0.747223 | 2.532714  |
| H | 8.434575  | -0.327083 | 3.409770  |
| C | 6.839896  | -0.080552 | 1.977756  |
| H | 6.499775  | 0.851035  | 2.433474  |
| C | 6.158984  | -0.583870 | 0.850836  |
| C | 6.463675  | 1.351032  | -2.319312 |
| H | 6.390363  | 0.323221  | -2.682495 |
| C | 7.183955  | 2.319150  | -3.010892 |
| H | 7.697154  | 2.062457  | -3.939058 |
| C | 7.227986  | 3.613738  | -2.478362 |
| H | 7.778167  | 4.406611  | -2.991262 |

|   |          |          |           |
|---|----------|----------|-----------|
| C | 6.567927 | 3.881513 | -1.284430 |
| H | 6.595415 | 4.882001 | -0.852959 |
| C | 5.861667 | 2.858573 | -0.624884 |
| C | 5.153031 | 2.995849 | 0.650042  |
| C | 5.177980 | 4.181102 | 1.409280  |
| H | 5.700167 | 5.066210 | 1.037052  |
| C | 4.551089 | 4.235716 | 2.649805  |
| H | 4.574921 | 5.155600 | 3.238878  |
| C | 3.902126 | 3.091399 | 3.138970  |
| H | 3.413583 | 3.119029 | 4.117830  |
| C | 3.861376 | 1.918061 | 2.384220  |
| H | 3.340416 | 1.045843 | 2.782555  |
| C | 4.468553 | 1.833516 | 1.115547  |

**Table S16.** The coordinate of Conformer 2 of I-Al(qBr<sub>2</sub>)<sub>3</sub> in S<sub>0</sub> state calculated at the level of B3LYP/def2-SVP.

| Coordinates /Angstrom |           |           |           |
|-----------------------|-----------|-----------|-----------|
| Elements              | X         | Y         | Z         |
| Al                    | 3.158032  | -0.077231 | -0.467227 |
| N                     | 3.446067  | -1.027661 | 1.384243  |
| N                     | 1.331785  | -0.958357 | -0.698805 |
| C                     | 3.077491  | -0.651091 | 2.600153  |
| C                     | 4.112413  | -2.200567 | 1.206760  |
| N                     | 4.920942  | 0.948615  | -0.298492 |
| O                     | 2.505921  | 1.401570  | 0.531531  |
| O                     | 2.811184  | 0.603947  | -2.157477 |
| O                     | 4.088477  | -1.604079 | -1.058733 |
| C                     | 0.625002  | -1.734366 | 0.109760  |
| C                     | 0.849386  | -0.663447 | -1.941937 |
| C                     | 3.356840  | -1.444592 | 3.732819  |
| H                     | 2.542278  | 0.296813  | 2.675976  |
| C                     | 4.446829  | -3.063247 | 2.290932  |
| C                     | 4.446402  | -2.476354 | -0.165390 |
| C                     | 6.111833  | 0.637609  | -0.784952 |
| C                     | 4.748585  | 2.083081  | 0.430635  |
| C                     | 3.396020  | 2.289941  | 0.876388  |
| C                     | 1.697062  | 0.211486  | -2.706823 |
| C                     | -0.617155 | -2.269468 | -0.273435 |
| H                     | 1.035622  | -1.930604 | 1.100723  |
| C                     | -0.403591 | -1.149969 | -2.407689 |
| C                     | 4.035737  | -2.639507 | 3.580909  |
| H                     | 3.031820  | -1.104410 | 4.717192  |

|    |           |           |           |
|----|-----------|-----------|-----------|
| C  | 5.156785  | -4.254317 | 1.970540  |
| C  | 5.149878  | -3.663867 | -0.398721 |
| C  | 7.231951  | 1.465033  | -0.556177 |
| H  | 6.170679  | -0.287704 | -1.363545 |
| C  | 5.822705  | 2.967891  | 0.728110  |
| C  | 3.178621  | 3.421757  | 1.667111  |
| C  | 1.216309  | 0.587544  | -3.964577 |
| C  | -1.134627 | -1.979606 | -1.520487 |
| H  | -1.176965 | -2.882445 | 0.428508  |
| C  | -0.816587 | -0.727880 | -3.703589 |
| H  | 4.264044  | -3.268493 | 4.443359  |
| C  | 5.495350  | -4.536712 | 0.658486  |
| C  | 7.090870  | 2.615810  | 0.197466  |
| H  | 8.199767  | 1.183842  | -0.974137 |
| C  | 5.516958  | 4.105783  | 1.528857  |
| C  | 4.227937  | 4.316708  | 1.983666  |
| C  | -0.020149 | 0.112253  | -4.458086 |
| H  | -2.104828 | -2.374775 | -1.821265 |
| H  | 6.042206  | -5.450786 | 0.424731  |
| H  | 7.946191  | 3.264862  | 0.394229  |
| H  | 4.006108  | 5.187064  | 2.601919  |
| H  | -0.354397 | 0.440375  | -5.442707 |
| Br | -2.516655 | -1.266915 | -4.384924 |
| Br | 6.888410  | 5.347242  | 1.995077  |
| Br | 5.655852  | -5.474451 | 3.349923  |
| Br | 2.226019  | 1.814382  | -5.004504 |
| Br | 1.435028  | 3.744765  | 2.350293  |
| Br | 5.658825  | -4.092360 | -2.174124 |
| Ir | -4.464899 | 0.064516  | 0.601881  |
| N  | -4.858021 | 2.007155  | 1.508450  |
| N  | -5.818508 | 0.266527  | -1.075591 |
| N  | -2.798629 | 0.872656  | -0.544379 |
| C  | -4.220785 | 3.154176  | 1.231080  |
| H  | -3.467781 | 3.108692  | 0.442516  |
| C  | -4.488355 | 4.342939  | 1.900696  |
| H  | -3.944149 | 5.251955  | 1.639841  |
| C  | -5.459479 | 4.327446  | 2.908573  |
| H  | -5.698780 | 5.237424  | 3.464417  |
| C  | -6.116254 | 3.137991  | 3.200289  |
| H  | -6.870123 | 3.106402  | 3.986319  |
| C  | -5.805698 | 1.965374  | 2.486369  |
| C  | -6.426332 | 0.655002  | 2.701012  |
| C  | -7.446726 | 0.452412  | 3.650770  |
| H  | -7.805963 | 1.282832  | 4.263586  |

|   |           |           |           |
|---|-----------|-----------|-----------|
| C | -8.012634 | -0.806280 | 3.820891  |
| H | -8.804009 | -0.959378 | 4.558635  |
| C | -7.556644 | -1.872315 | 3.031777  |
| H | -7.998680 | -2.865844 | 3.154574  |
| C | -6.545090 | -1.679567 | 2.090243  |
| H | -6.210084 | -2.529174 | 1.493136  |
| C | -5.943136 | -0.419992 | 1.895528  |
| C | -6.525762 | 1.364635  | -1.377134 |
| H | -6.504462 | 2.163354  | -0.632317 |
| C | -7.237132 | 1.492923  | -2.565288 |
| H | -7.801072 | 2.404135  | -2.771084 |
| C | -7.201153 | 0.428595  | -3.474553 |
| H | -7.735756 | 0.492677  | -4.425422 |
| C | -6.479345 | -0.716101 | -3.154360 |
| H | -6.442676 | -1.555722 | -3.848419 |
| C | -5.791439 | -0.794060 | -1.930381 |
| C | -5.034473 | -1.952520 | -1.447239 |
| C | -5.020633 | -3.186784 | -2.123748 |
| H | -5.527446 | -3.296688 | -3.085481 |
| C | -4.380140 | -4.288068 | -1.564447 |
| H | -4.372816 | -5.246047 | -2.089383 |
| C | -3.771192 | -4.159352 | -0.306232 |
| H | -3.294219 | -5.029729 | 0.154827  |
| C | -3.765981 | -2.932348 | 0.357576  |
| H | -3.292006 | -2.854827 | 1.338289  |
| C | -4.361761 | -1.783755 | -0.200744 |
| C | -2.864615 | 1.370650  | -1.787965 |
| H | -3.792263 | 1.192004  | -2.332824 |
| C | -1.814691 | 2.074620  | -2.367887 |
| H | -1.907661 | 2.449287  | -3.387773 |
| C | -0.650400 | 2.266447  | -1.617856 |
| H | 0.200971  | 2.808210  | -2.035014 |
| C | -0.573680 | 1.735086  | -0.334243 |
| H | 0.339605  | 1.852750  | 0.244679  |
| C | -1.664494 | 1.026520  | 0.194198  |
| C | -1.704736 | 0.407117  | 1.524627  |
| C | -0.567951 | 0.348790  | 2.351749  |
| H | 0.365829  | 0.806526  | 2.022194  |
| C | -0.631846 | -0.300089 | 3.582117  |
| H | 0.250751  | -0.349339 | 4.225422  |
| C | -1.840809 | -0.883230 | 3.990501  |
| H | -1.898019 | -1.393101 | 4.957127  |
| C | -2.975525 | -0.811468 | 3.178287  |
| H | -3.909011 | -1.264022 | 3.521385  |

|   |           |           |          |
|---|-----------|-----------|----------|
| C | -2.946313 | -0.168775 | 1.925332 |
|---|-----------|-----------|----------|

**Table S16.** The coordinate of Conformer 3 of I-Al(qBr<sub>2</sub>)<sub>3</sub> in S<sub>0</sub> state calculated at the level of B3LYP/def2-SVP.

| Elements | Coordinates /Angstrom |           |           |
|----------|-----------------------|-----------|-----------|
|          | X                     | Y         | Z         |
| Al       | -3.211061             | 0.068868  | -0.033488 |
| N        | -4.012145             | 1.729950  | -1.044525 |
| N        | -4.161198             | -1.238694 | -1.313124 |
| C        | -3.549060             | 2.383269  | -2.100491 |
| C        | -5.144874             | 2.151871  | -0.421594 |
| N        | -2.114451             | 1.320415  | 1.152076  |
| O        | -1.714540             | 0.206389  | -1.154030 |
| O        | -2.739370             | -1.500595 | 0.854168  |
| O        | -4.749992             | 0.341854  | 1.013157  |
| C        | -4.871156             | -1.021821 | -2.408764 |
| C        | -3.986764             | -2.510800 | -0.857067 |
| C        | -4.210074             | 3.524145  | -2.604336 |
| H        | -2.639335             | 1.986673  | -2.557232 |
| C        | -5.881823             | 3.290484  | -0.859682 |
| C        | -5.516086             | 1.347628  | 0.712407  |
| C        | -2.379864             | 1.791446  | 2.361690  |
| C        | -0.993894             | 1.717293  | 0.489446  |
| C        | -0.809531             | 1.072398  | -0.779637 |
| C        | -3.192082             | -2.605080 | 0.341150  |
| C        | -5.464748             | -2.078033 | -3.129841 |
| H        | -4.978379             | 0.015253  | -2.732755 |
| C        | -4.547154             | -3.641811 | -1.519620 |
| C        | -5.365315             | 3.974015  | -1.990658 |
| H        | -3.799636             | 4.040924  | -3.473245 |
| C        | -7.050150             | 3.624652  | -0.118478 |
| C        | -6.671321             | 1.745631  | 1.395201  |
| C        | -1.518467             | 2.716519  | 2.987873  |
| H        | -3.296850             | 1.427902  | 2.832577  |
| C        | -0.087100             | 2.673232  | 1.026311  |
| C        | 0.330171              | 1.443444  | -1.494036 |
| C        | -2.976884             | -3.896834 | 0.834459  |
| C        | -5.304790             | -3.377980 | -2.688564 |
| H        | -6.043575             | -1.856129 | -4.027666 |
| C        | -4.291454             | -4.920231 | -0.947526 |
| H        | -5.890988             | 4.855220  | -2.363478 |
| C        | -7.424444             | 2.867244  | 0.977922  |

|    |           |           |           |
|----|-----------|-----------|-----------|
| C  | -0.389479 | 3.162357  | 2.321507  |
| H  | -1.758030 | 3.080028  | 3.988398  |
| C  | 1.036015  | 3.021649  | 0.222825  |
| C  | 1.237479  | 2.412457  | -1.003092 |
| C  | -3.524462 | -5.033557 | 0.197591  |
| H  | -5.754486 | -4.213140 | -3.228610 |
| H  | -8.318890 | 3.135327  | 1.541319  |
| H  | 0.286160  | 3.884471  | 2.783398  |
| H  | 2.106318  | 2.674913  | -1.604017 |
| H  | -3.332465 | -6.017511 | 0.626597  |
| Br | -5.004918 | -6.494852 | -1.755118 |
| Br | 2.256309  | 4.343890  | 0.846200  |
| Br | -8.114681 | 5.123440  | -0.628563 |
| Br | -1.926690 | -4.126387 | 2.399749  |
| Br | 0.656564  | 0.593193  | -3.160386 |
| Br | -7.219580 | 0.761699  | 2.920636  |
| Ir | 4.778753  | -0.274056 | 0.050879  |
| N  | 2.667633  | -0.462194 | 0.547275  |
| N  | 5.265764  | -1.948327 | 1.362309  |
| N  | 4.596315  | -1.415383 | -1.783029 |
| C  | 1.788191  | -1.265177 | -0.073208 |
| H  | 2.102727  | -1.665087 | -1.038455 |
| C  | 0.549611  | -1.580987 | 0.471393  |
| H  | -0.143514 | -2.227097 | -0.065516 |
| C  | 0.210683  | -1.028957 | 1.711906  |
| H  | -0.757227 | -1.260561 | 2.155790  |
| C  | 1.107430  | -0.171099 | 2.337051  |
| H  | 0.861219  | 0.274914  | 3.300453  |
| C  | 2.347658  | 0.112352  | 1.739026  |
| C  | 3.392495  | 0.961605  | 2.319523  |
| C  | 3.163773  | 1.775818  | 3.443790  |
| H  | 2.177596  | 1.800457  | 3.914586  |
| C  | 4.183760  | 2.573667  | 3.952740  |
| H  | 4.002565  | 3.213404  | 4.820009  |
| C  | 5.443496  | 2.550039  | 3.336699  |
| H  | 6.251538  | 3.173045  | 3.732376  |
| C  | 5.677011  | 1.740428  | 2.223064  |
| H  | 6.665560  | 1.740635  | 1.758248  |
| C  | 4.664401  | 0.929457  | 1.676090  |
| C  | 4.392038  | -2.706517 | 2.041321  |
| H  | 3.335413  | -2.484849 | 1.882998  |
| C  | 4.789320  | -3.721906 | 2.904054  |
| H  | 4.040481  | -4.312752 | 3.433981  |
| C  | 6.160800  | -3.948000 | 3.068638  |



|   |          |           |           |
|---|----------|-----------|-----------|
| H | 6.518640 | -4.731653 | 3.741098  |
| C | 7.066981 | -3.160543 | 2.368685  |
| H | 8.138270 | -3.318216 | 2.489653  |
| C | 6.605788 | -2.149365 | 1.504711  |
| C | 7.460632 | -1.257496 | 0.715885  |
| C | 8.865628 | -1.358431 | 0.727034  |
| H | 9.361156 | -2.122139 | 1.331454  |
| C | 9.641773 | -0.488993 | -0.031274 |
| H | 10.73141 | -0.570122 | -0.019050 |
| C | 9.007568 | 0.490689  | -0.809450 |
| H | 9.609698 | 1.179797  | -1.409636 |
| C | 7.616439 | 0.595571  | -0.827061 |
| H | 7.151337 | 1.370103  | -1.439147 |
| C | 6.798207 | -0.265755 | -0.068301 |
| C | 4.645966 | -2.751692 | -1.879037 |
| H | 4.884193 | -3.286402 | -0.956685 |
| C | 4.405931 | -3.426193 | -3.071159 |
| H | 4.455238 | -4.515730 | -3.104534 |
| C | 4.103469 | -2.667330 | -4.208760 |
| H | 3.900233 | -3.156859 | -5.164458 |
| C | 4.066053 | -1.281257 | -4.111784 |
| H | 3.833844 | -0.673901 | -4.986265 |
| C | 4.324962 | -0.654269 | -2.879453 |
| C | 4.341961 | 0.791748  | -2.646729 |
| C | 4.198390 | 1.729477  | -3.686346 |
| H | 4.021144 | 1.396570  | -4.711761 |
| C | 4.289443 | 3.092585  | -3.422785 |
| H | 4.179890 | 3.818446  | -4.232085 |
| C | 4.537507 | 3.519912  | -2.108963 |
| H | 4.615716 | 4.588953  | -1.890858 |
| C | 4.667624 | 2.594743  | -1.073113 |
| H | 4.850034 | 2.953189  | -0.060102 |
| C | 4.559699 | 1.208301  | -1.299951 |

**Table S17.** The coordinate of Conformer 4 of I-Al(qBr<sub>2</sub>)<sub>3</sub> in S<sub>0</sub> state calculated at the level of

B3LYP/def2-SVP.

| <b>Coordinates /Angstrom</b> |           |           |          |
|------------------------------|-----------|-----------|----------|
| <b>Elements</b>              | <b>X</b>  | <b>Y</b>  | <b>Z</b> |
| Al                           | -3.558117 | -0.783809 | 0.323348 |
| N                            | -2.356276 | -0.995255 | 2.045295 |
| N                            | -5.234696 | -1.451487 | 1.321134 |
| C                            | -2.246115 | -0.217595 | 3.114486 |

|    |           |           |           |
|----|-----------|-----------|-----------|
| C  | -1.449242 | -1.984237 | 1.825855  |
| N  | -2.060275 | 0.066044  | -0.789567 |
| O  | -3.807870 | 1.001408  | 0.879738  |
| O  | -4.707878 | -0.786031 | -1.133592 |
| O  | -2.798251 | -2.471498 | -0.025384 |
| C  | -5.420254 | -1.783480 | 2.589094  |
| C  | -6.276105 | -1.516368 | 0.444358  |
| C  | -1.202278 | -0.396546 | 4.046339  |
| H  | -2.980242 | 0.587445  | 3.205348  |
| C  | -0.306885 | -2.173131 | 2.656008  |
| C  | -1.720582 | -2.758667 | 0.644138  |
| C  | -1.228450 | -0.504173 | -1.648657 |
| C  | -1.990917 | 1.402539  | -0.554621 |
| C  | -2.962320 | 1.871437  | 0.399361  |
| C  | -5.933548 | -1.138738 | -0.902603 |
| C  | -6.677932 | -2.200314 | 3.070923  |
| H  | -4.552932 | -1.721259 | 3.248749  |
| C  | -7.583799 | -1.925425 | 0.838837  |
| C  | -0.226744 | -1.348075 | 3.806204  |
| H  | -1.145564 | 0.254184  | 4.919903  |
| C  | 0.642345  | -3.144583 | 2.229117  |
| C  | -0.746899 | -3.701279 | 0.298611  |
| C  | -0.251839 | 0.247950  | -2.328658 |
| H  | -1.338846 | -1.579780 | -1.798819 |
| C  | -1.010081 | 2.232281  | -1.164765 |
| C  | -2.864114 | 3.220210  | 0.749623  |
| C  | -6.972472 | -1.191680 | -1.839469 |
| C  | -7.752177 | -2.269193 | 2.203548  |
| H  | -6.788482 | -2.463662 | 4.123962  |
| C  | -8.585315 | -1.948656 | -0.171799 |
| H  | 0.622942  | -1.461862 | 4.481636  |
| C  | 0.416889  | -3.883000 | 1.081346  |
| C  | -0.130922 | 1.601687  | -2.080362 |
| H  | 0.419244  | -0.258819 | -3.018126 |
| C  | -0.986332 | 3.596384  | -0.759977 |
| C  | -1.891421 | 4.070170  | 0.170055  |
| C  | -8.277085 | -1.591012 | -1.472532 |
| H  | -8.735913 | -2.588248 | 2.552802  |
| H  | 1.156900  | -4.610818 | 0.753101  |
| H  | 0.643290  | 2.191825  | -2.571231 |
| H  | -1.848191 | 5.111619  | 0.489467  |
| H  | -9.052164 | -1.614461 | -2.239346 |
| Br | -10.36963 | -2.474585 | 0.257530  |
| Br | 0.361666  | 4.767549  | -1.437009 |

|    |           |           |           |
|----|-----------|-----------|-----------|
| Br | 2.271941  | -3.381652 | 3.188334  |
| Br | -6.609294 | -0.713687 | -3.638133 |
| Br | -4.027296 | 3.904663  | 2.088710  |
| Br | -0.966861 | -4.700166 | -1.299560 |
| Ir | 4.429447  | 0.753298  | -0.351990 |
| N  | 4.945055  | 2.758003  | 0.299847  |
| N  | 3.641407  | 1.394337  | -2.271261 |
| N  | 6.411314  | 0.234341  | -1.075753 |
| C  | 6.124104  | 3.366448  | 0.107085  |
| H  | 6.898653  | 2.764818  | -0.373789 |
| C  | 6.359113  | 4.682927  | 0.488864  |
| H  | 7.334529  | 5.139068  | 0.312473  |
| C  | 5.314579  | 5.389372  | 1.098281  |
| H  | 5.453587  | 6.428060  | 1.408238  |
| C  | 4.095770  | 4.754945  | 1.308291  |
| H  | 3.270930  | 5.288538  | 1.779785  |
| C  | 3.919550  | 3.417588  | 0.907826  |
| C  | 2.696078  | 2.632457  | 1.084216  |
| C  | 1.573673  | 3.128199  | 1.774311  |
| H  | 1.573533  | 4.143155  | 2.177961  |
| C  | 0.452863  | 2.326749  | 1.950948  |
| H  | -0.425068 | 2.706153  | 2.477016  |
| C  | 0.455251  | 1.029032  | 1.423524  |
| H  | -0.425025 | 0.406707  | 1.534790  |
| C  | 1.559263  | 0.528846  | 0.739403  |
| H  | 1.528687  | -0.490715 | 0.350929  |
| C  | 2.713178  | 1.309630  | 0.550602  |
| C  | 3.594559  | 2.657318  | -2.717944 |
| H  | 3.980637  | 3.419263  | -2.038248 |
| C  | 3.074962  | 2.993607  | -3.963679 |
| H  | 3.042015  | 4.036898  | -4.280248 |
| C  | 2.597214  | 1.960585  | -4.778977 |
| H  | 2.187489  | 2.177637  | -5.768379 |
| C  | 2.638667  | 0.651323  | -4.311860 |
| H  | 2.262615  | -0.162902 | -4.931105 |
| C  | 3.149538  | 0.373996  | -3.029762 |
| C  | 3.170396  | -0.943147 | -2.388065 |
| C  | 2.628656  | -2.091871 | -2.999499 |
| H  | 2.204517  | -2.039077 | -4.005744 |
| C  | 2.618158  | -3.308736 | -2.326834 |
| H  | 2.184980  | -4.194782 | -2.795049 |
| C  | 3.161370  | -3.379396 | -1.034901 |
| H  | 3.167811  | -4.334931 | -0.502453 |
| C  | 3.697922  | -2.247373 | -0.421803 |

|   |           |           |           |
|---|-----------|-----------|-----------|
| H | 4.099014  | -2.330563 | 0.589686  |
| C | 3.718124  | -0.996983 | -1.071341 |
| C | 6.860792  | 0.418690  | -2.325181 |
| H | 6.153580  | 0.870602  | -3.024533 |
| C | 8.144449  | 0.059073  | -2.720762 |
| H | 8.469723  | 0.227866  | -3.748538 |
| C | 8.988476  | -0.522753 | -1.766786 |
| H | 10.005416 | -0.821136 | -2.033271 |
| C | 8.518479  | -0.723185 | -0.474006 |
| H | 9.160555  | -1.179878 | 0.278840  |
| C | 7.208317  | -0.339889 | -0.131724 |
| C | 6.588418  | -0.509406 | 1.185802  |
| C | 7.258329  | -1.113993 | 2.267191  |
| H | 8.287616  | -1.464104 | 2.155979  |
| C | 6.614181  | -1.281856 | 3.488577  |
| H | 7.134300  | -1.755648 | 4.324622  |
| C | 5.290560  | -0.839766 | 3.631220  |
| H | 4.773977  | -0.974489 | 4.586450  |
| C | 4.623324  | -0.234833 | 2.565735  |
| H | 3.589751  | 0.088552  | 2.700316  |
| C | 5.243291  | -0.052699 | 1.314296  |

**Table S18.** The coordinate of Conformer 5 of I-Al(qBr<sub>2</sub>)<sub>3</sub> in S<sub>0</sub> state calculated at the level of B3LYP/def2-SVP.

| <b>Coordinates /Angstrom</b> |          |           |           |
|------------------------------|----------|-----------|-----------|
| <b>Elements</b>              | <b>X</b> | <b>Y</b>  | <b>Z</b>  |
| Al                           | 3.297410 | -0.895956 | 0.120642  |
| N                            | 4.740652 | -1.067667 | 1.630070  |
| N                            | 2.162395 | -2.413128 | 0.892493  |
| C                            | 4.745308 | -0.567016 | 2.857369  |
| C                            | 5.818242 | -1.756574 | 1.168463  |
| N                            | 4.171943 | 0.793884  | -0.649026 |
| O                            | 2.447868 | 0.380780  | 1.246115  |
| O                            | 2.010629 | -0.890201 | -1.210970 |
| O                            | 4.539498 | -1.977696 | -0.781226 |
| C                            | 2.319578 | -3.157364 | 1.977347  |
| C                            | 1.050750 | -2.569157 | 0.115766  |
| C                            | 5.854043 | -0.737580 | 3.713773  |
| H                            | 3.847884 | -0.020988 | 3.158203  |
| C                            | 6.991219 | -1.959648 | 1.951337  |
| C                            | 5.662387 | -2.235050 | -0.179240 |
| C                            | 5.029254 | 0.901072  | -1.651117 |

|    |           |           |           |
|----|-----------|-----------|-----------|
| C  | 3.663976  | 1.907273  | -0.054167 |
| C  | 2.718578  | 1.631784  | 0.993466  |
| C  | 1.005336  | -1.704156 | -1.032503 |
| C  | 1.365167  | -4.119048 | 2.362101  |
| H  | 3.224709  | -2.990418 | 2.564809  |
| C  | 0.020911  | -3.499430 | 0.441796  |
| C  | 6.968389  | -1.423681 | 3.264515  |
| H  | 5.823084  | -0.318349 | 4.720698  |
| C  | 8.061478  | -2.666732 | 1.334045  |
| C  | 6.763641  | -2.907259 | -0.721744 |
| C  | 5.452247  | 2.164036  | -2.119041 |
| H  | 5.375887  | -0.035524 | -2.094798 |
| C  | 4.023785  | 3.221530  | -0.465545 |
| C  | 2.141388  | 2.744543  | 1.612659  |
| C  | -0.131894 | -1.812012 | -1.836979 |
| C  | 0.221310  | -4.283992 | 1.602259  |
| H  | 1.534170  | -4.713756 | 3.260999  |
| C  | -1.113664 | -3.531333 | -0.415187 |
| H  | 7.840416  | -1.558057 | 3.907408  |
| C  | 7.940875  | -3.121105 | 0.032285  |
| C  | 4.955908  | 3.313016  | -1.531867 |
| H  | 6.162345  | 2.218781  | -2.945530 |
| C  | 3.400931  | 4.303798  | 0.219876  |
| C  | 2.486731  | 4.061534  | 1.229375  |
| C  | -1.179862 | -2.706551 | -1.521080 |
| H  | -0.543798 | -5.006833 | 1.890215  |
| H  | 8.770755  | -3.653079 | -0.434229 |
| H  | 5.265281  | 4.299669  | -1.881747 |
| H  | 2.008011  | 4.897864  | 1.739607  |
| H  | -2.058212 | -2.718964 | -2.164479 |
| Br | -2.572117 | -4.696285 | -0.025005 |
| Br | 3.816428  | 6.104057  | -0.255018 |
| Br | 9.681339  | -2.981743 | 2.290572  |
| Br | -0.296029 | -0.734361 | -3.387391 |
| Br | 0.831717  | 2.472795  | 2.958976  |
| Br | 6.674906  | -3.513734 | -2.515577 |
| Ir | -4.564631 | 0.953420  | -0.218092 |
| N  | -4.510106 | 2.444983  | 1.369640  |
| N  | -5.610418 | 2.138493  | -1.702909 |
| N  | -2.584036 | 1.481933  | -0.920410 |
| C  | -3.498134 | 3.288371  | 1.618195  |
| H  | -2.662884 | 3.257835  | 0.916306  |
| C  | -3.490629 | 4.150495  | 2.709248  |
| H  | -2.640100 | 4.813517  | 2.875218  |

|   |           |           |           |
|---|-----------|-----------|-----------|
| C | -4.589405 | 4.124388  | 3.576048  |
| H | -4.625522 | 4.782554  | 4.447879  |
| C | -5.634520 | 3.242871  | 3.323641  |
| H | -6.490613 | 3.200705  | 3.996788  |
| C | -5.583163 | 2.387960  | 2.206628  |
| C | -6.599291 | 1.392067  | 1.850895  |
| C | -7.791641 | 1.235480  | 2.584374  |
| H | -8.000612 | 1.876408  | 3.444651  |
| C | -8.720248 | 0.265776  | 2.221653  |
| H | -9.644539 | 0.147889  | 2.792614  |
| C | -8.454981 | -0.556170 | 1.116063  |
| H | -9.179579 | -1.322817 | 0.824541  |
| C | -7.276891 | -0.405645 | 0.383726  |
| H | -7.094198 | -1.059836 | -0.470995 |
| C | -6.313349 | 0.565850  | 0.722383  |
| C | -5.977487 | 3.419755  | -1.560978 |
| H | -5.738173 | 3.878795  | -0.598805 |
| C | -6.623484 | 4.129699  | -2.567445 |
| H | -6.905933 | 5.171783  | -2.409190 |
| C | -6.898259 | 3.466076  | -3.769695 |
| H | -7.403703 | 3.985599  | -4.587650 |
| C | -6.526719 | 2.134189  | -3.912699 |
| H | -6.739778 | 1.599926  | -4.838472 |
| C | -5.877675 | 1.466082  | -2.857565 |
| C | -5.460784 | 0.061480  | -2.865390 |
| C | -5.698977 | -0.798397 | -3.955484 |
| H | -6.172880 | -0.420854 | -4.865232 |
| C | -5.344243 | -2.141335 | -3.882709 |
| H | -5.532604 | -2.807155 | -4.728352 |
| C | -4.757257 | -2.632158 | -2.705624 |
| H | -4.492575 | -3.691367 | -2.628379 |
| C | -4.507045 | -1.782149 | -1.627998 |
| H | -4.057463 | -2.187845 | -0.720849 |
| C | -4.834195 | -0.412910 | -1.674878 |
| C | -2.298047 | 2.342093  | -1.908823 |
| H | -3.150383 | 2.709236  | -2.484410 |
| C | -0.999578 | 2.756158  | -2.187960 |
| H | -0.813581 | 3.460292  | -3.000648 |
| C | 0.042195  | 2.231770  | -1.414476 |
| H | 1.079898  | 2.513399  | -1.605708 |
| C | -0.254602 | 1.323249  | -0.407700 |
| H | 0.532539  | 0.875944  | 0.186876  |
| C | -1.584818 | 0.954476  | -0.162167 |
| C | -2.016065 | 0.020592  | 0.882309  |

|   |           |           |          |
|---|-----------|-----------|----------|
| C | -1.105778 | -0.620431 | 1.742600 |
| H | -0.038889 | -0.399750 | 1.684553 |
| C | -1.567021 | -1.532412 | 2.687931 |
| H | -0.860683 | -2.032067 | 3.354843 |
| C | -2.939045 | -1.806505 | 2.770996 |
| H | -3.303902 | -2.534455 | 3.502161 |
| C | -3.848264 | -1.146395 | 1.940830 |
| H | -4.915202 | -1.359414 | 2.036843 |
| C | -3.420084 | -0.205556 | 0.986418 |

**Table S19.** The coordinate of Conformer 1 of I-Gaq<sub>3</sub> in S<sub>0</sub> state calculated at the level of B3LYP/def2-SVP.

| <b>Coordinates /Angstrom</b> |           |           |           |
|------------------------------|-----------|-----------|-----------|
| <b>Elements</b>              | <b>X</b>  | <b>Y</b>  | <b>Z</b>  |
| O                            | -1.701867 | -0.752109 | 0.366113  |
| C                            | -1.565857 | -2.049290 | 0.231314  |
| N                            | -3.151769 | 2.009560  | 0.114877  |
| N                            | -4.367153 | -0.503314 | 1.218339  |
| O                            | -5.103644 | 0.318045  | -1.193462 |
| O                            | -2.430091 | 0.780559  | -2.123156 |
| C                            | -0.646354 | -2.835693 | 0.927567  |
| C                            | -2.428580 | -2.733270 | -0.698300 |
| C                            | -2.813294 | 2.790188  | -0.942683 |
| C                            | -3.522829 | 2.556431  | 1.259831  |
| C                            | -5.693496 | -0.323051 | 1.003798  |
| C                            | -3.912566 | -0.900979 | 2.396623  |
| C                            | -6.053537 | 0.129271  | -0.319941 |
| C                            | -2.411239 | 2.085404  | -2.136345 |
| C                            | -0.557156 | -4.224445 | 0.690744  |
| C                            | -2.328202 | -4.134013 | -0.947724 |
| N                            | -3.351168 | -1.956099 | -1.317067 |
| C                            | -2.861546 | 4.214627  | -0.883396 |
| C                            | -3.589919 | 3.957877  | 1.419948  |
| H                            | -3.777181 | 1.877531  | 2.075830  |
| C                            | -6.664633 | -0.554634 | 2.022842  |
| C                            | -4.800228 | -1.156521 | 3.466575  |
| H                            | -2.828504 | -0.999612 | 2.494431  |
| C                            | -7.417088 | 0.331116  | -0.563130 |
| C                            | -2.022150 | 2.866054  | -3.229109 |
| C                            | -1.360100 | -4.880243 | -0.228609 |
| H                            | 0.196235  | -4.789730 | 1.245301  |
| C                            | -3.223229 | -4.659263 | -1.915990 |

|    |           |           |           |
|----|-----------|-----------|-----------|
| C  | -4.186250 | -2.464456 | -2.207963 |
| C  | -2.483145 | 4.956577  | -2.031016 |
| C  | -3.272058 | 4.777496  | 0.353006  |
| H  | -3.900640 | 4.372815  | 2.380345  |
| C  | -6.159524 | -0.986436 | 3.279342  |
| C  | -8.032276 | -0.337522 | 1.718343  |
| H  | -4.397670 | -1.483658 | 4.426935  |
| C  | -8.375518 | 0.095580  | 0.446382  |
| C  | -2.066157 | 4.275146  | -3.163546 |
| C  | -4.137878 | -3.834434 | -2.547377 |
| H  | -3.183751 | -5.725921 | -2.154959 |
| H  | -4.908960 | -1.771303 | -2.645189 |
| H  | -3.326681 | 5.865144  | 0.453056  |
| H  | -6.859939 | -1.179571 | 4.096902  |
| H  | -9.429834 | 0.264761  | 0.209428  |
| H  | -1.764011 | 4.844943  | -4.046777 |
| H  | -4.832237 | -4.227348 | -3.292223 |
| H  | -7.722215 | 0.676461  | -1.552919 |
| H  | 0.016190  | -2.349959 | 1.639493  |
| H  | -1.700539 | 2.361136  | -4.141917 |
| H  | -8.792779 | -0.511071 | 2.482420  |
| H  | -2.516991 | 6.047768  | -2.006025 |
| H  | -1.262546 | -5.953721 | -0.404693 |
| Ga | -3.260853 | -0.009923 | -0.546233 |
| Ir | 2.763534  | 0.046608  | 0.219941  |
| N  | 1.856788  | 1.960771  | -0.222045 |
| N  | 1.439961  | -1.083449 | -1.076135 |
| N  | 4.316928  | 0.151168  | -1.302740 |
| C  | 2.212548  | 2.778968  | -1.222307 |
| H  | 3.039299  | 2.435998  | -1.848476 |
| C  | 1.580456  | 3.994934  | -1.454790 |
| H  | 1.900222  | 4.630587  | -2.281869 |
| C  | 0.537960  | 4.369683  | -0.600313 |
| H  | 0.012086  | 5.313700  | -0.747617 |
| C  | 0.168370  | 3.519690  | 0.434675  |
| H  | -0.640597 | 3.795120  | 1.108682  |
| C  | 0.843070  | 2.300829  | 0.620402  |
| C  | 0.577098  | 1.335980  | 1.689937  |
| C  | -0.418400 | 1.538181  | 2.661697  |
| H  | -1.057133 | 2.422905  | 2.619382  |
| C  | -0.590908 | 0.623513  | 3.696344  |
| H  | -1.363349 | 0.786047  | 4.452856  |
| C  | 0.258798  | -0.490506 | 3.771315  |
| H  | 0.148275  | -1.202742 | 4.595071  |



|   |           |           |           |
|---|-----------|-----------|-----------|
| C | 1.243453  | -0.698807 | 2.803918  |
| H | 1.897716  | -1.569663 | 2.885570  |
| C | 1.416245  | 0.183662  | 1.719077  |
| C | 0.480302  | -0.568590 | -1.856856 |
| H | 0.262016  | 0.490814  | -1.726833 |
| C | -0.226469 | -1.336164 | -2.776743 |
| H | -1.026221 | -0.870046 | -3.350739 |
| C | 0.092988  | -2.692618 | -2.886421 |
| H | -0.438672 | -3.332076 | -3.595206 |
| C | 1.076084  | -3.231342 | -2.063123 |
| H | 1.321956  | -4.290768 | -2.118759 |
| C | 1.735307  | -2.411408 | -1.132657 |
| C | 2.744490  | -2.860482 | -0.166108 |
| C | 3.064963  | -4.218754 | 0.015129  |
| H | 2.573479  | -4.986447 | -0.587681 |
| C | 3.999381  | -4.600294 | 0.974314  |
| H | 4.243623  | -5.656172 | 1.115550  |
| C | 4.619597  | -3.615282 | 1.756496  |
| H | 5.355490  | -3.907065 | 2.512174  |
| C | 4.305870  | -2.265812 | 1.580989  |
| H | 4.800598  | -1.516755 | 2.203556  |
| C | 3.361364  | -1.845853 | 0.624580  |
| C | 4.223185  | -0.310460 | -2.558008 |
| H | 3.262787  | -0.748089 | -2.837224 |
| C | 5.277324  | -0.244586 | -3.462657 |
| H | 5.154750  | -0.631780 | -4.475419 |
| C | 6.482928  | 0.320008  | -3.029712 |
| H | 7.339629  | 0.387274  | -3.705037 |
| C | 6.582400  | 0.792824  | -1.726580 |
| H | 7.515176  | 1.229351  | -1.370497 |
| C | 5.479318  | 0.704108  | -0.856561 |
| C | 5.458299  | 1.165672  | 0.534400  |
| C | 6.569812  | 1.782542  | 1.141161  |
| H | 7.492722  | 1.939562  | 0.577269  |
| C | 6.508507  | 2.200251  | 2.466043  |
| H | 7.373236  | 2.677715  | 2.933433  |
| C | 5.324608  | 2.000437  | 3.191737  |
| H | 5.267233  | 2.325894  | 4.235102  |
| C | 4.219794  | 1.390822  | 2.596851  |
| H | 3.312048  | 1.244262  | 3.185175  |
| C | 4.246500  | 0.952050  | 1.257441  |

**Table S20.** The coordinate of Conformer 2 of I-Gaq<sub>3</sub> in S<sub>0</sub> state calculated at the level of

B3LYP/def2-SVP.

| <b>Coordinates /Angstrom</b> |           |           |           |
|------------------------------|-----------|-----------|-----------|
| <b>Elements</b>              | <b>X</b>  | <b>Y</b>  | <b>Z</b>  |
| O                            | -1.835241 | -0.650749 | 0.244520  |
| C                            | -1.653486 | -1.948338 | 0.176735  |
| N                            | -3.299273 | 2.024660  | -0.119730 |
| N                            | -4.486969 | -0.433982 | 1.159658  |
| O                            | -5.306302 | 0.238838  | -1.270938 |
| O                            | -2.648070 | 0.662748  | -2.307206 |
| C                            | -0.669677 | -2.649886 | 0.873065  |
| C                            | -2.526475 | -2.719298 | -0.669239 |
| C                            | -2.914562 | 2.738430  | -1.207651 |
| C                            | -3.647502 | 2.638800  | 0.998159  |
| C                            | -5.823019 | -0.303856 | 0.971314  |
| C                            | -3.991753 | -0.760176 | 2.343598  |
| C                            | -6.228702 | 0.069262  | -0.363641 |
| C                            | -2.547421 | 1.961960  | -2.368948 |
| C                            | -0.530147 | -4.045404 | 0.717984  |
| C                            | -2.379485 | -4.128847 | -0.834130 |
| N                            | -3.505548 | -2.018247 | -1.293816 |
| C                            | -2.881749 | 4.164704  | -1.207792 |
| C                            | -3.644663 | 4.047592  | 1.096130  |
| H                            | -3.941855 | 2.009646  | 1.840551  |
| C                            | -6.761293 | -0.513060 | 2.025373  |
| C                            | -4.844528 | -0.988010 | 3.447564  |
| H                            | -2.903116 | -0.825456 | 2.418513  |
| C                            | -7.602943 | 0.219723  | -0.581060 |
| C                            | -2.100952 | 2.674030  | -3.486779 |
| C                            | -1.348301 | -4.789093 | -0.118270 |
| H                            | 0.272905  | -4.544238 | 1.266984  |
| C                            | -3.298760 | -4.749767 | -1.719927 |
| C                            | -4.360619 | -2.615680 | -2.107335 |
| C                            | -2.446333 | 4.835476  | -2.378535 |
| C                            | -3.273355 | 4.801537  | -0.001326 |
| H                            | -3.941590 | 4.520143  | 2.034059  |
| C                            | -6.212644 | -0.867245 | 3.287902  |
| C                            | -8.141879 | -0.351205 | 1.745980  |
| H                            | -4.408511 | -1.256570 | 4.411481  |
| C                            | -8.528851 | 0.007805  | 0.463611  |
| C                            | -2.058453 | 4.084701  | -3.477050 |
| C                            | -4.275602 | -4.003319 | -2.355885 |
| H                            | -3.228621 | -5.827884 | -1.890696 |
| H                            | -5.127223 | -1.979344 | -2.556187 |
| H                            | -3.270099 | 5.893882  | 0.051571  |

|    |           |           |           |
|----|-----------|-----------|-----------|
| H  | -6.886560 | -1.040604 | 4.131732  |
| H  | -9.593225 | 0.134297  | 0.245864  |
| H  | -1.712534 | 4.599236  | -4.377972 |
| H  | -4.988924 | -4.471021 | -3.036848 |
| H  | -7.942763 | 0.505116  | -1.578598 |
| H  | -0.004583 | -2.083421 | 1.519607  |
| H  | -1.802043 | 2.114085  | -4.374942 |
| H  | -8.878139 | -0.508678 | 2.536815  |
| H  | -2.413303 | 5.926786  | -2.397497 |
| H  | -1.214038 | -5.866958 | -0.232369 |
| Ga | -3.444384 | -0.023181 | -0.664651 |
| Ir | 2.844534  | 0.060622  | 0.236764  |
| N  | 1.817653  | 1.931628  | -0.108538 |
| N  | 1.516149  | -1.073258 | -1.054109 |
| N  | 4.339008  | 0.295010  | -1.326049 |
| C  | 2.110756  | 2.812578  | -1.075240 |
| H  | 2.960681  | 2.556111  | -1.711468 |
| C  | 1.388194  | 3.985184  | -1.262024 |
| H  | 1.658742  | 4.676567  | -2.061361 |
| C  | 0.318493  | 4.243436  | -0.398274 |
| H  | -0.272241 | 5.153249  | -0.507668 |
| C  | 0.010471  | 3.326230  | 0.599263  |
| H  | -0.822755 | 3.511059  | 1.275140  |
| C  | 0.778687  | 2.157798  | 0.742196  |
| C  | 0.599772  | 1.140981  | 1.782522  |
| C  | -0.403059 | 1.227556  | 2.763964  |
| H  | -1.133902 | 2.039492  | 2.735572  |
| C  | -0.470648 | 0.285879  | 3.787030  |
| H  | -1.246700 | 0.359662  | 4.553559  |
| C  | 0.485241  | -0.740404 | 3.836789  |
| H  | 0.454892  | -1.471055 | 4.650897  |
| C  | 1.466122  | -0.846067 | 2.849387  |
| H  | 2.189253  | -1.662924 | 2.899976  |
| C  | 1.538551  | 0.067624  | 1.777547  |
| C  | 0.520844  | -0.566071 | -1.795152 |
| H  | 0.297069  | 0.491028  | -1.650861 |
| C  | -0.215128 | -1.338047 | -2.688138 |
| H  | -1.042938 | -0.878751 | -3.227791 |
| C  | 0.113195  | -2.691020 | -2.812816 |
| H  | -0.441903 | -3.335013 | -3.499128 |
| C  | 1.138588  | -3.220188 | -2.036138 |
| H  | 1.394206  | -4.276511 | -2.107722 |
| C  | 1.828997  | -2.396031 | -1.132594 |
| C  | 2.890200  | -2.836136 | -0.218007 |

|   |          |           |           |
|---|----------|-----------|-----------|
| C | 3.248893 | -4.189371 | -0.072859 |
| H | 2.743049 | -4.960043 | -0.659922 |
| C | 4.241478 | -4.563048 | 0.829260  |
| H | 4.514497 | -5.615220 | 0.942542  |
| C | 4.883558 | -3.575394 | 1.589786  |
| H | 5.666131 | -3.860819 | 2.299586  |
| C | 4.530626 | -2.231254 | 1.452327  |
| H | 5.040218 | -1.479925 | 2.059925  |
| C | 3.525139 | -1.819854 | 0.556402  |
| C | 4.225486 | -0.125234 | -2.594248 |
| H | 3.277096 | -0.596717 | -2.859491 |
| C | 5.246103 | 0.021329  | -3.527447 |
| H | 5.108380 | -0.334473 | -4.549732 |
| C | 6.438550 | 0.625059  | -3.111034 |
| H | 7.269111 | 0.755765  | -3.809304 |
| C | 6.558986 | 1.054586  | -1.794717 |
| H | 7.482508 | 1.519776  | -1.451004 |
| C | 5.489815 | 0.883881  | -0.895304 |
| C | 5.493332 | 1.292242  | 0.512146  |
| C | 6.593645 | 1.939507  | 1.107653  |
| H | 7.489413 | 2.161282  | 0.522117  |
| C | 6.554954 | 2.305965  | 2.448430  |
| H | 7.410718 | 2.807358  | 2.907184  |
| C | 5.404989 | 2.024858  | 3.201282  |
| H | 5.365223 | 2.311056  | 4.256914  |
| C | 4.311433 | 1.384352  | 2.618003  |
| H | 3.430615 | 1.175085  | 3.227912  |
| C | 4.316664 | 0.994370  | 1.263347  |

**Table S21.** The coordinate of Conformer 3 of I-Gaq<sub>3</sub> in S<sub>0</sub> state calculated at the level of B3LYP/def2-SVP.

| <b>Coordinates /Angstrom</b> |          |           |           |
|------------------------------|----------|-----------|-----------|
| <b>Elements</b>              | <b>X</b> | <b>Y</b>  | <b>Z</b>  |
| O                            | 5.762608 | -0.760876 | 0.163118  |
| C                            | 6.065901 | -1.168875 | -1.038123 |
| N                            | 2.887817 | 0.108449  | 0.083917  |
| N                            | 5.024617 | -2.950242 | 1.951530  |
| O                            | 2.475700 | -2.531126 | 1.375396  |
| O                            | 4.071649 | -0.235002 | 2.434438  |
| C                            | 7.194131 | -0.763774 | -1.760001 |
| C                            | 5.188572 | -2.115728 | -1.683874 |

|    |          |           |           |
|----|----------|-----------|-----------|
| C  | 2.788797 | 1.121871  | 0.986607  |
| C  | 2.288007 | 0.200823  | -1.091899 |
| C  | 4.128027 | -3.853782 | 2.420674  |
| C  | 6.316026 | -3.078819 | 2.202333  |
| C  | 2.749340 | -3.595517 | 2.087245  |
| C  | 3.454227 | 0.902939  | 2.246383  |
| C  | 7.446046 | -1.271433 | -3.053071 |
| C  | 5.448990 | -2.629188 | -2.989696 |
| N  | 4.100070 | -2.487164 | -0.964633 |
| C  | 2.048149 | 2.307320  | 0.714721  |
| C  | 1.525724 | 1.331454  | -1.442936 |
| H  | 2.390771 | -0.643918 | -1.774651 |
| C  | 4.524604 | -4.982947 | 3.194004  |
| C  | 6.803620 | -4.163232 | 2.965558  |
| H  | 6.967545 | -2.304442 | 1.789693  |
| C  | 1.804151 | -4.516293 | 2.546485  |
| C  | 3.371547 | 1.930373  | 3.191199  |
| C  | 6.608048 | -2.185059 | -3.674542 |
| H  | 8.339987 | -0.926098 | -3.580144 |
| C  | 4.502611 | -3.560141 | -3.495635 |
| C  | 3.234139 | -3.361004 | -1.452088 |
| C  | 1.989524 | 3.315025  | 1.712353  |
| C  | 1.400391 | 2.374734  | -0.546767 |
| H  | 1.022843 | 1.358576  | -2.407057 |
| C  | 5.916155 | -5.104401 | 3.453451  |
| C  | 3.523830 | -5.884566 | 3.640525  |
| H  | 7.874596 | -4.242903 | 3.160147  |
| C  | 2.201107 | -5.637383 | 3.310669  |
| C  | 2.651748 | 3.113666  | 2.911970  |
| C  | 3.407763 | -3.925895 | -2.735031 |
| H  | 4.652005 | -3.983831 | -4.492725 |
| H  | 2.384400 | -3.612387 | -0.814977 |
| H  | 0.794097 | 3.246476  | -0.801127 |
| H  | 6.275683 | -5.950717 | 4.045499  |
| H  | 1.428171 | -6.331509 | 3.652397  |
| H  | 2.611447 | 3.890553  | 3.681084  |
| H  | 2.672293 | -4.640575 | -3.108467 |
| H  | 0.751205 | -4.353191 | 2.307296  |
| H  | 7.874308 | -0.044654 | -1.299503 |
| H  | 3.873174 | 1.794006  | 4.151309  |
| H  | 0.541951 | -2.261009 | -0.165890 |
| H  | 1.423182 | 4.228050  | 1.518954  |
| H  | 6.825077 | -2.563928 | -4.675302 |
| Ga | 4.060259 | -1.418998 | 0.898615  |

|    |           |           |           |
|----|-----------|-----------|-----------|
| Ir | -3.087225 | 1.294766  | -0.496778 |
| N  | -3.884048 | 3.059814  | 0.473977  |
| N  | -1.534156 | 1.045701  | 1.008288  |
| N  | -4.385996 | -0.158404 | 0.474129  |
| C  | -4.838676 | 3.069179  | 1.414830  |
| H  | -5.310604 | 2.106290  | 1.622884  |
| C  | -5.209828 | 4.225530  | 2.092859  |
| H  | -5.993528 | 4.188737  | 2.851230  |
| C  | -4.552610 | 5.419237  | 1.770680  |
| H  | -4.808451 | 6.349937  | 2.283079  |
| C  | -3.571616 | 5.411696  | 0.785033  |
| H  | -3.055056 | 6.333106  | 0.516363  |
| C  | -3.244921 | 4.212196  | 0.126735  |
| C  | -2.269717 | 4.071164  | -0.959420 |
| C  | -1.596425 | 5.170926  | -1.526316 |
| H  | -1.727791 | 6.174511  | -1.113745 |
| C  | -0.774893 | 4.996545  | -2.636153 |
| H  | -0.255995 | 5.851040  | -3.076838 |
| C  | -0.646964 | 3.716601  | -3.199140 |
| H  | -0.027676 | 3.577836  | -4.090721 |
| C  | -1.294734 | 2.621924  | -2.626999 |
| H  | -1.181982 | 1.633610  | -3.077159 |
| C  | -2.095267 | 2.751906  | -1.474806 |
| C  | -1.370571 | 1.795260  | 2.108143  |
| H  | -1.984514 | 2.695380  | 2.172890  |
| C  | -0.476238 | 1.456724  | 3.117870  |
| H  | -0.363043 | 2.104124  | 3.988068  |
| C  | 0.271296  | 0.283856  | 2.973462  |
| H  | 0.988888  | -0.020818 | 3.737256  |
| C  | 0.116570  | -0.485383 | 1.824775  |
| H  | 0.726219  | -1.377596 | 1.686413  |
| C  | -0.790041 | -0.081168 | 0.832072  |
| C  | -1.021351 | -0.782583 | -0.436912 |
| C  | -0.239567 | -1.884836 | -0.829441 |
| H  | 3.805857  | -6.756102 | 4.234789  |
| C  | -0.444748 | -2.477294 | -2.073016 |
| H  | 0.167196  | -3.327354 | -2.385635 |
| C  | -1.440789 | -1.971861 | -2.921434 |
| H  | -1.604765 | -2.432538 | -3.900519 |
| C  | -2.230784 | -0.889581 | -2.524937 |
| H  | -3.007804 | -0.518949 | -3.197764 |
| C  | -2.048592 | -0.262593 | -1.277418 |
| C  | -4.136687 | -0.791605 | 1.629579  |
| H  | -3.212916 | -0.513154 | 2.140152  |

|   |           |           |           |
|---|-----------|-----------|-----------|
| C | -4.992273 | -1.751647 | 2.158782  |
| H | -4.748280 | -2.241045 | 3.102999  |
| C | -6.153213 | -2.066371 | 1.442819  |
| H | -6.851483 | -2.818637 | 1.818126  |
| C | -6.408857 | -1.414407 | 0.242494  |
| H | -7.303860 | -1.652823 | -0.331435 |
| C | -5.507790 | -0.448123 | -0.242452 |
| C | -5.664051 | 0.304886  | -1.490015 |
| C | -6.786426 | 0.150257  | -2.327019 |
| H | -7.584660 | -0.546475 | -2.059417 |
| C | -6.895056 | 0.883147  | -3.503696 |
| H | -7.767192 | 0.760712  | -4.150515 |
| C | -5.872828 | 1.780480  | -3.846196 |
| H | -5.950205 | 2.362706  | -4.769600 |
| C | -4.758797 | 1.939592  | -3.021252 |
| H | -3.979160 | 2.644792  | -3.314803 |
| C | -4.612795 | 1.211195  | -1.823145 |

**Table S22.** The coordinate of Conformer 4 of I-Gaq<sub>3</sub> in S<sub>0</sub> state calculated at the level of B3LYP/def2-SVP.

| <b>Coordinates /Angstrom</b> |          |           |           |
|------------------------------|----------|-----------|-----------|
| <b>Elements</b>              | <b>X</b> | <b>Y</b>  | <b>Z</b>  |
| O                            | 6.073525 | -2.381021 | 1.010981  |
| C                            | 7.151340 | -2.123008 | 0.324452  |
| N                            | 2.899680 | -0.284937 | -0.402481 |
| N                            | 3.291888 | -2.528182 | 1.774605  |
| O                            | 3.780987 | -2.938184 | -0.796948 |
| O                            | 4.622545 | 0.066441  | 1.569158  |
| C                            | 8.420545 | -2.637499 | 0.610044  |
| C                            | 7.048059 | -1.244375 | -0.816880 |
| C                            | 2.899154 | 0.928323  | 0.204242  |
| C                            | 2.049220 | -0.546838 | -1.384193 |
| C                            | 2.643721 | -3.559067 | 1.177476  |
| C                            | 3.132739 | -2.273459 | 3.061213  |
| C                            | 2.933865 | -3.746534 | -0.225257 |
| C                            | 3.851240 | 1.080331  | 1.277347  |
| C                            | 9.534960 | -2.299692 | -0.186950 |
| C                            | 8.178974 | -0.904905 | -1.618928 |
| N                            | 5.806396 | -0.759591 | -1.077910 |
| C                            | 2.013075 | 1.972034  | -0.186830 |
| C                            | 1.126885 | 0.421136  | -1.829316 |
| H                            | 2.108052 | -1.543322 | -1.825005 |

|    |           |           |           |
|----|-----------|-----------|-----------|
| C  | 1.730297  | -4.391455 | 1.889922  |
| C  | 2.259754  | -3.053184 | 3.853074  |
| H  | 3.700425  | -1.428599 | 3.459435  |
| C  | 2.256599  | -4.790147 | -0.868218 |
| C  | 3.865565  | 2.317404  | 1.931571  |
| C  | 9.441861  | -1.453740 | -1.281458 |
| H  | 10.507959 | -2.724893 | 0.075452  |
| C  | 7.934672  | -0.027793 | -2.708286 |
| C  | 5.603391  | 0.056755  | -2.098486 |
| C  | 2.076220  | 3.208617  | 0.505586  |
| C  | 1.111189  | 1.671756  | -1.241509 |
| H  | 0.422972  | 0.169835  | -2.620447 |
| C  | 1.560268  | -4.093137 | 3.269127  |
| C  | 1.069947  | -5.429243 | 1.185623  |
| H  | 2.142553  | -2.819436 | 4.912737  |
| C  | 1.345020  | -5.604752 | -0.162408 |
| C  | 2.990036  | 3.354382  | 1.537179  |
| C  | 6.660192  | 0.450310  | -2.947511 |
| H  | 8.767354  | 0.264252  | -3.354371 |
| H  | 4.583282  | 0.413115  | -2.257338 |
| H  | 0.398310  | 2.424067  | -1.581501 |
| H  | 0.870567  | -4.699297 | 3.862979  |
| H  | 0.836902  | -6.405472 | -0.706920 |
| H  | 3.039500  | 4.305986  | 2.074560  |
| H  | 6.455244  | 1.126098  | -3.779701 |
| H  | 2.450978  | -4.960630 | -1.928802 |
| H  | 8.527469  | -3.305767 | 1.466567  |
| H  | 4.575564  | 2.466263  | 2.747668  |
| H  | 0.131962  | -2.834691 | -0.016921 |
| H  | 1.400281  | 4.017566  | 0.221853  |
| H  | 10.318371 | -1.205389 | -1.883366 |
| Ga | 4.467159  | -1.498802 | 0.377452  |
| Ir | -3.239564 | 0.992870  | -0.206666 |
| N  | -3.637887 | 3.012478  | 0.470574  |
| N  | -1.396535 | 0.843897  | 0.936173  |
| N  | -4.391278 | -0.027884 | 1.329728  |
| C  | -4.351623 | 3.345891  | 1.554953  |
| H  | -4.834041 | 2.518571  | 2.080352  |
| C  | -4.474395 | 4.659646  | 1.994908  |
| H  | -5.066537 | 4.887584  | 2.882626  |
| C  | -3.823343 | 5.662827  | 1.266834  |
| H  | -3.890107 | 6.707833  | 1.579372  |
| C  | -3.094255 | 5.317732  | 0.133807  |
| H  | -2.589660 | 6.087304  | -0.450238 |



|   |           |           |           |
|---|-----------|-----------|-----------|
| C | -3.011854 | 3.971844  | -0.266892 |
| C | -2.320624 | 3.476864  | -1.462479 |
| C | -1.692178 | 4.333665  | -2.387133 |
| H | -1.639784 | 5.409155  | -2.200018 |
| C | -1.148347 | 3.822505  | -3.562069 |
| H | -0.663732 | 4.488799  | -4.279483 |
| C | -1.255347 | 2.447601  | -3.825275 |
| H | -0.854995 | 2.043314  | -4.759963 |
| C | -1.856258 | 1.592283  | -2.901452 |
| H | -1.925982 | 0.525312  | -3.123481 |
| C | -2.377125 | 2.067053  | -1.680796 |
| C | -0.930081 | 1.758363  | 1.798429  |
| H | -1.457136 | 2.714053  | 1.816405  |
| C | 0.160452  | 1.518554  | 2.626048  |
| H | 0.521529  | 2.296178  | 3.298876  |
| C | 0.783392  | 0.269497  | 2.550157  |
| H | 1.640492  | 0.040456  | 3.183628  |
| C | 0.307068  | -0.675659 | 1.648084  |
| H | 0.779808  | -1.650578 | 1.568905  |
| C | -0.788940 | -0.370335 | 0.825400  |
| C | -1.369768 | -1.265928 | -0.179204 |
| C | -0.777322 | -2.497505 | -0.516209 |
| H | 0.358909  | -6.072771 | 1.707014  |
| C | -1.337327 | -3.295089 | -1.508973 |
| H | -0.865961 | -4.244707 | -1.770757 |
| C | -2.501237 | -2.863037 | -2.161678 |
| H | -2.947058 | -3.485998 | -2.943166 |
| C | -3.097885 | -1.645273 | -1.824595 |
| H | -4.004940 | -1.330489 | -2.345806 |
| C | -2.552903 | -0.808787 | -0.832036 |
| C | -3.927266 | -0.445332 | 2.516545  |
| H | -2.878908 | -0.225242 | 2.726787  |
| C | -4.720585 | -1.121630 | 3.436631  |
| H | -4.300534 | -1.441727 | 4.391461  |
| C | -6.053884 | -1.377662 | 3.095214  |
| H | -6.712883 | -1.908420 | 3.786810  |
| C | -6.532713 | -0.953233 | 1.861443  |
| H | -7.565752 | -1.150505 | 1.576458  |
| C | -5.683137 | -0.270914 | 0.970464  |
| C | -6.065553 | 0.221555  | -0.355850 |
| C | -7.367828 | 0.069909  | -0.871285 |
| H | -8.143603 | -0.424271 | -0.281160 |
| C | -7.684010 | 0.546063  | -2.138963 |
| H | -8.695015 | 0.426407  | -2.535749 |

|   |           |          |           |
|---|-----------|----------|-----------|
| C | -6.690025 | 1.180025 | -2.899098 |
| H | -6.930013 | 1.557905 | -3.897670 |
| C | -5.398110 | 1.333813 | -2.394992 |
| H | -4.643722 | 1.827282 | -3.010402 |
| C | -5.041633 | 0.862891 | -1.115558 |

**Table S23.** The coordinate of Conformer 5 of I-Gaq<sub>3</sub> in S<sub>0</sub> state calculated at the level of B3LYP/def2-SVP.

| <b>Coordinates /Angstrom</b> |          |           |           |
|------------------------------|----------|-----------|-----------|
| <b>Elements</b>              | <b>X</b> | <b>Y</b>  | <b>Z</b>  |
| O                            | 5.841238 | -0.551469 | -0.098632 |
| C                            | 5.963903 | -0.973390 | -1.327084 |
| N                            | 2.948091 | 0.153645  | 0.073353  |
| N                            | 5.488420 | -2.591837 | 1.948121  |
| O                            | 2.862930 | -2.412262 | 1.650506  |
| O                            | 4.322071 | 0.034237  | 2.344433  |
| C                            | 6.911426 | -0.506128 | -2.244603 |
| C                            | 5.065404 | -2.002641 | -1.793667 |
| C                            | 2.799705 | 1.183637  | 0.949170  |
| C                            | 2.288162 | 0.155441  | -1.074497 |
| C                            | 4.725535 | -3.474910 | 2.639804  |
| C                            | 6.806993 | -2.611641 | 2.040418  |
| C                            | 3.300606 | -3.344739 | 2.457119  |
| C                            | 3.551645 | 1.076914  | 2.174997  |
| C                            | 6.968227 | -1.027932 | -3.555145 |
| C                            | 5.125278 | -2.526827 | -3.119760 |
| N                            | 4.152354 | -2.433180 | -0.888299 |
| C                            | 1.936075 | 2.284418  | 0.683168  |
| C                            | 1.416831 | 1.204778  | -1.424489 |
| H                            | 2.430191 | -0.699394 | -1.737095 |
| C                            | 5.296987 | -4.463695 | 3.492173  |
| C                            | 7.463853 | -3.556094 | 2.860551  |
| H                            | 7.343280 | -1.861215 | 1.454297  |
| C                            | 2.490828 | -4.244472 | 3.155952  |
| C                            | 3.387583 | 2.105232  | 3.108667  |
| C                            | 6.105502 | -2.015515 | -4.006791 |
| H                            | 7.724365 | -0.630428 | -4.238114 |
| C                            | 4.172768 | -3.532040 | -3.437651 |
| C                            | 3.278771 | -3.376164 | -1.201547 |
| C                            | 1.811542 | 3.303912  | 1.661567  |
| C                            | 1.237583 | 2.259588  | -0.551584 |
| H                            | 0.869566 | 1.156185  | -2.363706 |

|    |           |           |           |
|----|-----------|-----------|-----------|
| C  | 6.715196  | -4.470914 | 3.577403  |
| C  | 4.428474  | -5.350651 | 4.179572  |
| H  | 8.553702  | -3.549026 | 2.919114  |
| C  | 3.060504  | -5.224948 | 3.999493  |
| C  | 2.531012  | 3.195976  | 2.840603  |
| C  | 3.261252  | -3.957586 | -2.488998 |
| H  | 4.169716  | -3.964586 | -4.442043 |
| H  | 2.576289  | -3.663958 | -0.416717 |
| H  | 0.551066  | 3.069700  | -0.801006 |
| H  | 7.206570  | -5.208244 | 4.218522  |
| H  | 2.388984  | -5.907148 | 4.528527  |
| H  | 2.435349  | 3.979361  | 3.598180  |
| H  | 2.525171  | -4.730089 | -2.718389 |
| H  | 1.407258  | -4.174430 | 3.039946  |
| H  | 7.603856  | 0.274778  | -1.924406 |
| H  | 3.942705  | 2.046929  | 4.047003  |
| H  | 0.514879  | -2.425016 | -0.782700 |
| H  | 1.148562  | 4.150302  | 1.472100  |
| H  | 6.168391  | -2.400762 | -5.026478 |
| Ga | 4.287330  | -1.245788 | 0.890150  |
| Ir | -3.146887 | 1.102991  | -0.506926 |
| N  | -3.842234 | 2.811427  | 0.628415  |
| N  | -1.502763 | 0.715286  | 0.864638  |
| N  | -4.415772 | -0.384580 | 0.445663  |
| C  | -4.743626 | 2.775567  | 1.619817  |
| H  | -5.221389 | 1.808805  | 1.793665  |
| C  | -5.055081 | 3.891846  | 2.388768  |
| H  | -5.796157 | 3.818822  | 3.186369  |
| C  | -4.393533 | 5.093093  | 2.106011  |
| H  | -4.602557 | 5.992843  | 2.689926  |
| C  | -3.468724 | 5.133231  | 1.068272  |
| H  | -2.950635 | 6.061975  | 0.829585  |
| C  | -3.201945 | 3.973386  | 0.318190  |
| C  | -2.291181 | 3.887717  | -0.828248 |
| C  | -1.617318 | 5.008938  | -1.350922 |
| H  | -1.702115 | 5.983701  | -0.863885 |
| C  | -0.851615 | 4.893307  | -2.507425 |
| H  | -0.329994 | 5.763909  | -2.911704 |
| C  | -0.779735 | 3.652274  | -3.160084 |
| H  | -0.201213 | 3.560042  | -4.084249 |
| C  | -1.428483 | 2.534994  | -2.634402 |
| H  | -1.356232 | 1.578136  | -3.155575 |
| C  | -2.175076 | 2.603793  | -1.440886 |
| C  | -1.259715 | 1.362455  | 2.013936  |

|   |           |           |           |
|---|-----------|-----------|-----------|
| H | -1.868743 | 2.248139  | 2.204279  |
| C | -0.289350 | 0.944299  | 2.918654  |
| H | -0.109488 | 1.514932  | 3.830069  |
| C | 0.452634  | -0.199644 | 2.609787  |
| H | 1.234725  | -0.566735 | 3.276817  |
| C | 0.204380  | -0.867490 | 1.414477  |
| H | 0.806266  | -1.739639 | 1.170451  |
| C | -0.773297 | -0.385881 | 0.532809  |
| C | -1.094747 | -0.971013 | -0.774751 |
| C | -0.331014 | -2.011331 | -1.334740 |
| H | 4.845228  | -6.115586 | 4.837960  |
| C | -0.631500 | -2.500455 | -2.603001 |
| H | -0.027950 | -3.299316 | -3.041472 |
| C | -1.712310 | -1.952929 | -3.309905 |
| H | -1.956778 | -2.333468 | -4.306385 |
| C | -2.479389 | -0.925989 | -2.753880 |
| H | -3.316218 | -0.514749 | -3.323174 |
| C | -2.193637 | -0.398925 | -1.479473 |
| C | -4.109830 | -1.098143 | 1.539141  |
| H | -3.145123 | -0.879083 | 2.000742  |
| C | -4.959027 | -2.065337 | 2.065495  |
| H | -4.668645 | -2.621112 | 2.958458  |
| C | -6.175395 | -2.299716 | 1.413462  |
| H | -6.871380 | -3.053875 | 1.789238  |
| C | -6.489746 | -1.564739 | 0.276560  |
| H | -7.429484 | -1.738425 | -0.246871 |
| C | -5.592002 | -0.595307 | -0.208518 |
| C | -5.807154 | 0.242313  | -1.391889 |
| C | -6.982253 | 0.167520  | -2.165025 |
| H | -7.779422 | -0.529480 | -1.894893 |
| C | -7.144130 | 0.979697  | -3.282061 |
| H | -8.056951 | 0.918797  | -3.879545 |
| C | -6.123087 | 1.876909  | -3.628826 |
| H | -6.242812 | 2.521042  | -4.505372 |
| C | -4.956474 | 1.956647  | -2.867417 |
| H | -4.177803 | 2.662652  | -3.161929 |
| C | -4.755980 | 1.146195  | -1.731803 |

**Table S24.** The original SOC matrix elements calculated for I-Alq<sub>3</sub>.

| States         |                | SOC elements /cm <sup>-1</sup> |             |             |             |             |
|----------------|----------------|--------------------------------|-------------|-------------|-------------|-------------|
| T <sub>i</sub> | S <sub>j</sub> | Conformer 1                    | Conformer 2 | Conformer 3 | Conformer 4 | Conformer 5 |
| 1              | 0              | 0.62                           | 1.96        | 15.25       | 0.82        | 0.63        |

|   |    |       |       |        |       |       |
|---|----|-------|-------|--------|-------|-------|
| 1 | 1  | 2.56  | 5.07  | 14.53  | 4.42  | 6.25  |
| 1 | 2  | 6.21  | 12.72 | 647.62 | 12.41 | 6.90  |
| 1 | 3  | 5.67  | 15.38 | 580.36 | 12.96 | 8.48  |
| 1 | 4  | 1.42  | 9.23  | 52.35  | 4.06  | 5.36  |
| 1 | 5  | 0.30  | 7.37  | 40.19  | 8.12  | 0.92  |
| 1 | 6  | 1.06  | 2.20  | 40.10  | 0.75  | 1.20  |
| 1 | 7  | 0.26  | 4.60  | 59.07  | 2.57  | 1.32  |
| 1 | 8  | 0.34  | 2.26  | 36.57  | 1.23  | 0.75  |
| 1 | 9  | 2.15  | 4.02  | 15.90  | 0.59  | 0.44  |
| 1 | 10 | 1.21  | 1.70  | 8.01   | 2.32  | 1.74  |
| 1 | 11 | 1.04  | 0.80  | 3.81   | 1.23  | 1.04  |
| 1 | 12 | 2.17  | 5.36  | 9.75   | 2.34  | 0.59  |
| 1 | 13 | 0.60  | 3.95  | 2.84   | 0.83  | 0.68  |
| 1 | 14 | 1.74  | 3.26  | 3.73   | 0.82  | 0.64  |
| 1 | 15 | 0.29  | 2.93  | 3.82   | 0.80  | 0.62  |
| 1 | 16 | 1.13  | 3.21  | 3.37   | 0.11  | 0.26  |
| 1 | 17 | 0.71  | 1.27  | 4.70   | 0.37  | 0.34  |
| 1 | 18 | 0.64  | 0.64  | 6.06   | 0.29  | 0.57  |
| 1 | 19 | 0.41  | 0.55  | 41.13  | 0.27  | 0.23  |
| 1 | 20 | 0.66  | 0.46  | 6.20   | 0.18  | 0.16  |
| 1 | 21 | 0.78  | 0.44  | 2.91   | 0.61  | 0.32  |
| 1 | 22 | 0.47  | 0.86  | 1.59   | 0.16  | 0.64  |
| 1 | 23 | 0.09  | 0.50  | 9.32   | 0.40  | 0.26  |
| 1 | 24 | 0.22  | 0.21  | 53.67  | 0.30  | 0.13  |
| 1 | 25 | 0.50  | 0.55  | 4.96   | 0.27  | 0.14  |
| 1 | 26 | 0.10  | 0.40  | 38.21  | 0.19  | 0.18  |
| 1 | 27 | 0.32  | 0.19  | 15.34  | 0.28  | 0.10  |
| 1 | 28 | 0.22  | 0.56  | 23.41  | 0.11  | 0.30  |
| 1 | 29 | 0.14  | 0.80  | 45.25  | 0.21  | 0.17  |
| 1 | 30 | 0.19  | 0.56  | 14.67  | 0.36  | 0.31  |
| 2 | 0  | 9.27  | 1.54  | 3.17   | 4.17  | 0.39  |
| 2 | 1  | 62.23 | 43.72 | 10.13  | 38.97 | 9.11  |
| 2 | 2  | 73.16 | 15.48 | 14.75  | 22.08 | 5.91  |
| 2 | 3  | 78.33 | 32.02 | 9.71   | 34.04 | 2.39  |
| 2 | 4  | 5.42  | 23.14 | 12.26  | 11.74 | 2.48  |
| 2 | 5  | 3.95  | 5.28  | 11.96  | 15.45 | 2.10  |
| 2 | 6  | 2.93  | 4.30  | 19.80  | 19.38 | 4.68  |
| 2 | 7  | 1.49  | 19.96 | 15.86  | 9.30  | 11.56 |
| 2 | 8  | 5.62  | 6.21  | 4.36   | 2.84  | 4.26  |
| 2 | 9  | 8.23  | 4.60  | 14.59  | 4.01  | 6.45  |
| 2 | 10 | 4.14  | 1.21  | 21.39  | 15.98 | 4.66  |
| 2 | 11 | 6.95  | 3.71  | 2.36   | 7.31  | 5.69  |
| 2 | 12 | 5.10  | 8.83  | 0.87   | 5.66  | 0.96  |
| 2 | 13 | 2.35  | 9.56  | 0.22   | 1.76  | 1.87  |

|   |    |       |       |       |       |       |
|---|----|-------|-------|-------|-------|-------|
| 2 | 14 | 5.02  | 5.56  | 0.56  | 1.51  | 2.40  |
| 2 | 15 | 5.46  | 4.39  | 0.71  | 2.25  | 3.40  |
| 2 | 16 | 5.05  | 6.01  | 0.80  | 1.97  | 1.42  |
| 2 | 17 | 3.05  | 2.88  | 1.66  | 0.97  | 0.38  |
| 2 | 18 | 3.93  | 0.64  | 0.69  | 2.88  | 2.33  |
| 2 | 19 | 3.91  | 1.75  | 1.12  | 1.81  | 1.15  |
| 2 | 20 | 4.16  | 0.58  | 0.76  | 1.06  | 0.36  |
| 2 | 21 | 2.25  | 1.07  | 0.50  | 0.23  | 0.80  |
| 2 | 22 | 0.77  | 0.34  | 0.32  | 0.83  | 0.62  |
| 2 | 23 | 1.76  | 1.15  | 0.75  | 1.34  | 0.55  |
| 2 | 24 | 0.97  | 0.60  | 0.76  | 0.81  | 0.36  |
| 2 | 25 | 0.33  | 0.43  | 1.37  | 0.25  | 0.21  |
| 2 | 26 | 1.60  | 0.77  | 1.49  | 0.49  | 0.23  |
| 2 | 27 | 1.70  | 0.22  | 1.10  | 1.70  | 0.46  |
| 2 | 28 | 2.35  | 0.55  | 0.61  | 0.83  | 0.23  |
| 2 | 29 | 0.68  | 0.04  | 1.63  | 1.02  | 0.35  |
| 2 | 30 | 1.75  | 1.46  | 0.49  | 0.35  | 0.09  |
| 3 | 0  | 21.19 | 19.37 | 0.42  | 2.08  | 2.67  |
| 3 | 1  | 1.83  | 4.76  | 18.49 | 10.06 | 29.79 |
| 3 | 2  | 46.73 | 11.63 | 10.71 | 5.65  | 12.26 |
| 3 | 3  | 42.41 | 16.87 | 14.24 | 8.83  | 3.82  |
| 3 | 4  | 6.79  | 20.72 | 1.63  | 16.72 | 18.04 |
| 3 | 5  | 23.61 | 16.64 | 4.36  | 5.14  | 2.37  |
| 3 | 6  | 4.03  | 40.44 | 3.38  | 15.02 | 4.15  |
| 3 | 7  | 18.67 | 33.53 | 3.74  | 6.18  | 8.04  |
| 3 | 8  | 38.22 | 15.57 | 3.01  | 2.60  | 1.65  |
| 3 | 9  | 61.94 | 24.86 | 1.35  | 15.01 | 4.15  |
| 3 | 10 | 8.40  | 7.02  | 0.73  | 17.42 | 12.45 |
| 3 | 11 | 26.17 | 27.64 | 0.08  | 43.36 | 10.30 |
| 3 | 12 | 69.46 | 24.54 | 0.67  | 7.04  | 7.18  |
| 3 | 13 | 20.82 | 51.88 | 0.20  | 1.39  | 4.76  |
| 3 | 14 | 21.91 | 40.51 | 0.51  | 9.71  | 0.97  |
| 3 | 15 | 11.76 | 29.46 | 0.08  | 10.74 | 2.39  |
| 3 | 16 | 10.22 | 5.13  | 0.46  | 7.71  | 3.37  |
| 3 | 17 | 7.67  | 21.60 | 0.03  | 3.68  | 1.32  |
| 3 | 18 | 5.87  | 3.19  | 0.27  | 34.91 | 8.23  |
| 3 | 19 | 13.55 | 5.83  | 1.74  | 7.70  | 2.68  |
| 3 | 20 | 6.95  | 7.52  | 0.50  | 4.35  | 4.02  |
| 3 | 21 | 2.67  | 3.96  | 0.31  | 2.48  | 0.88  |
| 3 | 32 | 1.57  | 6.57  | 0.64  | 5.46  | 1.21  |
| 3 | 23 | 2.83  | 3.51  | 1.35  | 1.45  | 1.23  |
| 3 | 24 | 7.60  | 6.74  | 3.99  | 0.62  | 1.48  |
| 3 | 25 | 2.33  | 2.65  | 0.10  | 2.05  | 2.66  |
| 3 | 26 | 2.42  | 5.09  | 0.78  | 0.75  | 1.20  |

|   |    |        |        |        |        |        |
|---|----|--------|--------|--------|--------|--------|
| 3 | 27 | 4.39   | 5.82   | 0.86   | 0.95   | 1.14   |
| 3 | 28 | 4.70   | 8.63   | 0.60   | 2.35   | 0.68   |
| 3 | 29 | 3.40   | 0.66   | 1.24   | 0.56   | 1.01   |
| 3 | 30 | 6.47   | 5.19   | 0.38   | 1.10   | 0.52   |
| 4 | 0  | 95.81  | 231.43 | 19.48  | 262.58 | 273.03 |
| 4 | 1  | 19.25  | 96.96  | 603.72 | 26.27  | 159.10 |
| 4 | 2  | 623.83 | 353.89 | 146.37 | 295.71 | 271.22 |
| 4 | 3  | 582.73 | 450.62 | 518.74 | 335.50 | 255.87 |
| 4 | 4  | 90.73  | 57.76  | 27.47  | 157.02 | 162.03 |
| 4 | 5  | 24.62  | 265.95 | 50.86  | 174.63 | 176.56 |
| 4 | 6  | 30.35  | 374.15 | 32.22  | 60.11  | 508.69 |
| 4 | 7  | 15.95  | 146.35 | 34.22  | 406.49 | 133.24 |
| 4 | 8  | 42.40  | 51.94  | 52.60  | 385.50 | 96.51  |
| 4 | 9  | 72.85  | 94.88  | 15.68  | 43.32  | 128.37 |
| 4 | 10 | 44.07  | 56.78  | 6.33   | 200.25 | 113.42 |
| 4 | 11 | 85.29  | 35.81  | 2.33   | 16.48  | 149.63 |
| 4 | 12 | 39.98  | 173.11 | 10.58  | 51.05  | 128.26 |
| 4 | 13 | 25.85  | 191.81 | 6.15   | 54.60  | 168.71 |
| 4 | 14 | 38.82  | 249.42 | 3.33   | 49.23  | 201.26 |
| 4 | 15 | 35.95  | 24.18  | 1.83   | 407.57 | 280.08 |
| 4 | 16 | 65.02  | 11.01  | 6.13   | 96.49  | 106.06 |
| 4 | 17 | 46.86  | 142.01 | 3.13   | 18.49  | 11.62  |
| 4 | 18 | 50.81  | 13.21  | 12.88  | 65.67  | 81.90  |
| 4 | 19 | 46.70  | 67.27  | 50.07  | 128.67 | 99.49  |
| 4 | 20 | 50.80  | 25.26  | 12.31  | 46.24  | 95.03  |
| 4 | 21 | 38.67  | 84.81  | 11.69  | 11.41  | 10.18  |
| 4 | 42 | 10.67  | 112.24 | 1.88   | 22.82  | 10.43  |
| 4 | 23 | 25.70  | 66.73  | 43.95  | 133.31 | 124.99 |
| 4 | 24 | 14.27  | 39.86  | 135.07 | 51.81  | 30.56  |
| 4 | 25 | 3.11   | 47.72  | 1.58   | 48.02  | 37.26  |
| 4 | 26 | 13.10  | 41.65  | 29.64  | 8.31   | 42.26  |
| 4 | 27 | 14.42  | 44.34  | 12.50  | 46.57  | 61.23  |
| 4 | 28 | 14.08  | 36.76  | 20.44  | 78.18  | 30.55  |
| 4 | 29 | 12.30  | 10.56  | 40.02  | 72.10  | 95.83  |
| 4 | 30 | 29.50  | 68.32  | 13.62  | 16.55  | 18.16  |
| 5 | 0  | 95.39  | 144.51 | 20.35  | 79.30  | 177.32 |
| 5 | 1  | 579.00 | 109.26 | 514.97 | 9.28   | 59.92  |
| 5 | 2  | 381.15 | 318.09 | 406.63 | 497.54 | 189.34 |
| 5 | 3  | 319.98 | 328.43 | 216.15 | 487.45 | 294.65 |
| 5 | 4  | 123.75 | 250.99 | 42.99  | 303.93 | 161.50 |
| 5 | 5  | 197.21 | 110.81 | 16.49  | 335.37 | 19.27  |
| 5 | 6  | 46.74  | 394.78 | 4.84   | 38.35  | 70.45  |
| 5 | 7  | 35.30  | 186.20 | 13.30  | 228.33 | 90.84  |
| 5 | 8  | 96.78  | 119.30 | 24.68  | 204.41 | 228.96 |

|   |    |        |        |        |        |        |
|---|----|--------|--------|--------|--------|--------|
| 5 | 9  | 172.84 | 94.41  | 6.56   | 16.35  | 94.61  |
| 5 | 10 | 102.64 | 61.93  | 2.25   | 125.08 | 69.14  |
| 5 | 11 | 117.80 | 52.95  | 3.56   | 26.13  | 51.57  |
| 5 | 12 | 71.74  | 175.42 | 6.86   | 44.95  | 83.70  |
| 5 | 13 | 41.64  | 209.92 | 2.95   | 18.62  | 67.07  |
| 5 | 14 | 40.34  | 248.23 | 1.33   | 37.25  | 112.25 |
| 5 | 15 | 57.43  | 168.21 | 2.33   | 186.79 | 156.59 |
| 5 | 16 | 79.77  | 69.98  | 4.35   | 24.17  | 469.11 |
| 5 | 17 | 39.24  | 132.32 | 4.68   | 14.49  | 132.91 |
| 5 | 18 | 57.29  | 29.93  | 7.09   | 33.30  | 140.31 |
| 5 | 19 | 53.43  | 80.89  | 26.11  | 36.96  | 226.21 |
| 5 | 20 | 63.36  | 46.82  | 6.64   | 14.66  | 260.95 |
| 5 | 21 | 44.84  | 31.59  | 4.78   | 3.34   | 49.39  |
| 5 | 22 | 11.72  | 56.18  | 0.69   | 11.88  | 5.19   |
| 5 | 23 | 30.83  | 66.96  | 23.32  | 57.23  | 61.09  |
| 5 | 24 | 32.43  | 34.53  | 95.98  | 40.56  | 107.08 |
| 5 | 25 | 3.34   | 14.59  | 6.37   | 19.69  | 19.12  |
| 5 | 26 | 22.93  | 40.60  | 6.10   | 9.92   | 15.27  |
| 5 | 27 | 17.79  | 36.98  | 0.94   | 25.32  | 55.42  |
| 5 | 28 | 12.37  | 25.84  | 5.86   | 34.16  | 21.18  |
| 5 | 29 | 13.91  | 6.30   | 1.05   | 26.82  | 62.86  |
| 5 | 30 | 23.38  | 39.59  | 6.12   | 12.74  | 41.20  |
| 6 | 0  | 103.56 | 66.84  | 7.91   | 35.51  | 105.66 |
| 6 | 1  | 566.44 | 319.48 | 388.26 | 603.78 | 392.57 |
| 6 | 2  | 363.08 | 280.90 | 361.51 | 37.40  | 515.21 |
| 6 | 3  | 341.25 | 231.15 | 65.31  | 382.23 | 285.74 |
| 6 | 4  | 98.19  | 440.91 | 52.41  | 115.39 | 399.50 |
| 6 | 5  | 48.27  | 206.48 | 37.14  | 154.65 | 131.23 |
| 6 | 6  | 46.71  | 247.38 | 30.15  | 34.40  | 212.74 |
| 6 | 7  | 28.45  | 106.19 | 47.66  | 40.27  | 43.84  |
| 6 | 8  | 64.03  | 148.85 | 13.11  | 29.56  | 50.82  |
| 6 | 9  | 138.67 | 57.99  | 8.14   | 36.33  | 57.58  |
| 6 | 10 | 88.86  | 26.99  | 4.05   | 36.92  | 51.84  |
| 6 | 11 | 89.36  | 48.73  | 2.37   | 11.01  | 36.99  |
| 6 | 12 | 85.50  | 106.42 | 6.30   | 17.97  | 29.76  |
| 6 | 13 | 38.19  | 58.86  | 5.12   | 12.33  | 10.87  |
| 6 | 14 | 46.69  | 93.57  | 2.02   | 10.33  | 25.02  |
| 6 | 15 | 45.18  | 242.61 | 2.48   | 37.78  | 25.26  |
| 6 | 16 | 81.08  | 93.31  | 3.49   | 37.96  | 46.04  |
| 6 | 17 | 73.96  | 167.96 | 2.78   | 15.32  | 7.51   |
| 6 | 18 | 36.19  | 23.00  | 3.45   | 11.59  | 37.35  |
| 6 | 19 | 61.93  | 168.09 | 19.63  | 23.42  | 47.59  |
| 6 | 20 | 65.08  | 63.04  | 8.88   | 19.89  | 39.79  |
| 6 | 21 | 55.29  | 49.88  | 8.83   | 1.70   | 5.55   |



|   |    |        |        |        |        |        |
|---|----|--------|--------|--------|--------|--------|
| 6 | 22 | 13.03  | 99.57  | 0.47   | 1.65   | 2.63   |
| 6 | 23 | 46.87  | 68.23  | 21.28  | 19.79  | 36.62  |
| 6 | 24 | 25.86  | 16.15  | 69.41  | 12.31  | 15.69  |
| 6 | 25 | 1.78   | 34.43  | 5.81   | 7.82   | 18.33  |
| 6 | 26 | 15.76  | 42.48  | 13.97  | 5.16   | 1.15   |
| 6 | 27 | 12.19  | 34.00  | 5.82   | 23.54  | 23.79  |
| 6 | 28 | 12.94  | 21.72  | 8.25   | 9.32   | 11.81  |
| 6 | 29 | 21.05  | 4.82   | 18.52  | 12.47  | 34.82  |
| 6 | 30 | 41.98  | 45.59  | 7.67   | 5.51   | 10.78  |
| 7 | 0  | 245.13 | 207.22 | 44.04  | 150.28 | 126.26 |
| 7 | 1  | 344.02 | 380.43 | 46.27  | 584.55 | 482.26 |
| 7 | 2  | 85.98  | 113.87 | 51.05  | 359.66 | 250.48 |
| 7 | 3  | 272.36 | 315.73 | 51.99  | 100.81 | 308.29 |
| 7 | 4  | 61.36  | 127.08 | 10.30  | 226.81 | 289.36 |
| 7 | 5  | 211.36 | 124.61 | 513.80 | 190.82 | 171.33 |
| 7 | 6  | 34.33  | 147.08 | 413.85 | 85.30  | 360.87 |
| 7 | 7  | 67.44  | 70.53  | 579.98 | 129.59 | 60.96  |
| 7 | 8  | 196.44 | 219.23 | 172.55 | 140.91 | 93.56  |
| 7 | 9  | 364.35 | 58.68  | 71.00  | 126.81 | 123.81 |
| 7 | 10 | 147.03 | 59.59  | 48.81  | 27.27  | 28.15  |
| 7 | 11 | 272.74 | 194.08 | 11.94  | 44.87  | 57.96  |
| 7 | 12 | 198.40 | 61.58  | 58.33  | 37.94  | 92.21  |
| 7 | 13 | 117.58 | 59.77  | 5.15   | 13.71  | 73.59  |
| 7 | 14 | 115.32 | 79.83  | 3.56   | 5.27   | 70.85  |
| 7 | 15 | 132.78 | 288.07 | 2.78   | 51.18  | 70.29  |
| 7 | 16 | 204.16 | 105.62 | 1.62   | 129.91 | 99.02  |
| 7 | 17 | 169.58 | 278.87 | 6.93   | 4.83   | 13.54  |
| 7 | 18 | 29.06  | 3.75   | 21.35  | 40.00  | 63.85  |
| 7 | 19 | 154.84 | 256.93 | 21.71  | 102.71 | 107.21 |
| 7 | 20 | 160.17 | 66.53  | 14.44  | 52.04  | 59.08  |
| 7 | 21 | 118.05 | 95.37  | 32.05  | 4.85   | 7.37   |
| 7 | 22 | 9.60   | 142.54 | 10.59  | 7.32   | 3.37   |
| 7 | 23 | 92.26  | 58.05  | 11.60  | 36.61  | 62.94  |
| 7 | 24 | 54.91  | 41.74  | 13.62  | 17.81  | 28.41  |
| 7 | 25 | 6.59   | 61.89  | 29.86  | 40.72  | 37.98  |
| 7 | 26 | 34.73  | 2.07   | 41.16  | 6.48   | 23.77  |
| 7 | 27 | 5.27   | 15.25  | 7.55   | 36.63  | 58.69  |
| 7 | 28 | 21.18  | 67.12  | 16.83  | 30.88  | 22.75  |
| 7 | 29 | 31.17  | 14.30  | 14.46  | 21.41  | 62.32  |
| 7 | 30 | 93.97  | 57.50  | 12.83  | 8.02   | 15.64  |
| 8 | 0  | 241.27 | 189.57 | 101.95 | 200.07 | 170.30 |
| 8 | 1  | 13.48  | 560.05 | 15.99  | 54.80  | 505.33 |
| 8 | 2  | 8.16   | 261.10 | 39.53  | 44.58  | 269.37 |
| 8 | 3  | 6.54   | 240.86 | 16.15  | 69.42  | 103.14 |

|   |    |        |        |        |        |        |
|---|----|--------|--------|--------|--------|--------|
| 8 | 4  | 5.55   | 223.50 | 362.28 | 246.67 | 423.71 |
| 8 | 5  | 20.58  | 191.39 | 74.54  | 32.93  | 85.34  |
| 8 | 6  | 6.62   | 222.30 | 94.78  | 33.33  | 303.61 |
| 8 | 7  | 267.07 | 104.84 | 288.77 | 158.83 | 88.64  |
| 8 | 8  | 206.95 | 83.15  | 89.73  | 133.90 | 62.41  |
| 8 | 9  | 95.93  | 37.85  | 494.05 | 276.27 | 194.41 |
| 8 | 10 | 25.17  | 37.25  | 517.70 | 132.78 | 91.58  |
| 8 | 11 | 185.89 | 96.79  | 56.74  | 15.65  | 72.57  |
| 8 | 12 | 143.95 | 24.81  | 19.93  | 33.81  | 47.91  |
| 8 | 13 | 523.10 | 107.51 | 27.88  | 23.01  | 71.54  |
| 8 | 14 | 56.39  | 88.36  | 16.52  | 73.22  | 95.97  |
| 8 | 15 | 203.76 | 94.74  | 68.06  | 243.04 | 162.64 |
| 8 | 16 | 122.38 | 44.51  | 36.07  | 512.07 | 66.08  |
| 8 | 17 | 344.02 | 140.51 | 31.83  | 42.92  | 22.05  |
| 8 | 18 | 73.45  | 16.79  | 102.75 | 138.87 | 106.13 |
| 8 | 19 | 179.39 | 124.02 | 18.74  | 306.29 | 210.98 |
| 8 | 20 | 214.23 | 27.92  | 82.57  | 208.12 | 135.44 |
| 8 | 21 | 112.04 | 69.57  | 79.61  | 13.96  | 3.63   |
| 8 | 22 | 32.72  | 88.32  | 6.06   | 8.56   | 1.82   |
| 8 | 23 | 65.91  | 66.38  | 51.52  | 120.22 | 100.85 |
| 8 | 24 | 34.44  | 30.57  | 17.82  | 95.05  | 62.71  |
| 8 | 25 | 4.15   | 43.59  | 88.47  | 82.30  | 56.32  |
| 8 | 26 | 28.44  | 14.52  | 10.87  | 4.85   | 21.44  |
| 8 | 27 | 29.52  | 21.83  | 2.20   | 48.65  | 52.49  |
| 8 | 28 | 33.97  | 60.12  | 21.89  | 42.47  | 24.11  |
| 8 | 29 | 13.01  | 12.83  | 38.28  | 60.81  | 55.81  |
| 8 | 30 | 76.14  | 62.12  | 30.67  | 46.74  | 28.53  |
| 9 | 0  | 30.64  | 56.27  | 9.92   | 225.91 | 190.05 |
| 9 | 1  | 80.12  | 338.80 | 41.21  | 246.34 | 169.38 |
| 9 | 2  | 109.58 | 292.89 | 33.07  | 170.46 | 102.09 |
| 9 | 3  | 137.69 | 274.17 | 8.68   | 224.23 | 599.72 |
| 9 | 4  | 3.75   | 306.93 | 507.66 | 516.28 | 349.11 |
| 9 | 5  | 22.42  | 211.14 | 113.85 | 124.17 | 76.37  |
| 9 | 6  | 1.92   | 297.38 | 108.46 | 138.54 | 154.22 |
| 9 | 7  | 8.34   | 188.89 | 370.69 | 260.13 | 117.96 |
| 9 | 8  | 24.57  | 52.48  | 104.35 | 343.70 | 170.88 |
| 9 | 9  | 54.79  | 69.31  | 414.77 | 153.73 | 111.67 |
| 9 | 10 | 24.13  | 50.29  | 384.12 | 110.10 | 100.73 |
| 9 | 11 | 22.61  | 98.78  | 30.15  | 28.21  | 137.44 |
| 9 | 12 | 37.08  | 119.07 | 34.56  | 67.23  | 117.04 |
| 9 | 13 | 17.62  | 108.84 | 26.43  | 17.97  | 164.54 |
| 9 | 14 | 10.59  | 87.95  | 16.65  | 28.90  | 225.42 |
| 9 | 15 | 28.20  | 59.39  | 10.95  | 197.37 | 229.99 |
| 9 | 16 | 18.73  | 31.28  | 42.91  | 197.87 | 52.25  |

|    |    |        |        |        |        |        |
|----|----|--------|--------|--------|--------|--------|
| 9  | 17 | 32.51  | 122.77 | 55.09  | 28.39  | 22.83  |
| 9  | 18 | 3.94   | 22.63  | 23.98  | 61.43  | 153.87 |
| 9  | 19 | 18.95  | 53.88  | 19.44  | 132.78 | 148.98 |
| 9  | 20 | 21.30  | 16.37  | 13.74  | 86.08  | 116.60 |
| 9  | 21 | 15.50  | 43.85  | 38.96  | 5.82   | 11.61  |
| 9  | 22 | 2.85   | 48.84  | 7.04   | 13.12  | 8.19   |
| 9  | 23 | 18.83  | 57.78  | 22.88  | 127.60 | 201.76 |
| 9  | 24 | 12.76  | 43.17  | 22.85  | 50.82  | 109.09 |
| 9  | 25 | 0.52   | 38.84  | 26.63  | 36.75  | 67.85  |
| 9  | 26 | 4.59   | 30.28  | 27.35  | 12.82  | 58.59  |
| 9  | 27 | 2.04   | 29.50  | 3.76   | 66.86  | 99.73  |
| 9  | 28 | 6.12   | 29.22  | 16.90  | 59.61  | 29.28  |
| 9  | 29 | 5.62   | 8.12   | 6.44   | 63.69  | 67.67  |
| 9  | 30 | 13.40  | 25.22  | 4.61   | 19.09  | 60.86  |
| 10 | 0  | 173.77 | 117.58 | 261.98 | 83.70  | 80.49  |
| 10 | 1  | 32.90  | 118.95 | 4.30   | 317.46 | 384.26 |
| 10 | 2  | 13.90  | 66.90  | 3.47   | 86.94  | 373.84 |
| 10 | 3  | 31.74  | 85.05  | 4.45   | 206.41 | 325.44 |
| 10 | 4  | 2.80   | 165.36 | 37.49  | 109.36 | 29.24  |
| 10 | 5  | 257.35 | 59.39  | 45.36  | 18.28  | 31.09  |
| 10 | 6  | 38.64  | 162.71 | 45.79  | 42.36  | 215.51 |
| 10 | 7  | 264.72 | 253.04 | 23.67  | 80.56  | 43.37  |
| 10 | 8  | 100.77 | 233.60 | 5.78   | 35.57  | 24.63  |
| 10 | 9  | 264.19 | 266.04 | 71.17  | 36.05  | 69.40  |
| 10 | 10 | 90.26  | 23.32  | 75.77  | 71.31  | 45.36  |
| 10 | 11 | 256.10 | 155.14 | 335.72 | 31.39  | 69.52  |
| 10 | 12 | 416.38 | 260.90 | 1.87   | 48.19  | 53.21  |
| 10 | 13 | 65.81  | 196.95 | 86.70  | 14.53  | 39.66  |
| 10 | 14 | 117.58 | 121.90 | 69.42  | 10.81  | 13.32  |
| 10 | 15 | 64.08  | 239.82 | 571.83 | 71.61  | 30.18  |
| 10 | 16 | 47.68  | 51.04  | 39.37  | 26.82  | 25.50  |
| 10 | 17 | 145.27 | 201.52 | 131.72 | 9.67   | 12.94  |
| 10 | 18 | 40.22  | 24.36  | 235.45 | 12.93  | 45.09  |
| 10 | 19 | 169.98 | 107.56 | 71.63  | 36.67  | 35.25  |
| 10 | 20 | 149.85 | 65.73  | 431.73 | 8.30   | 32.04  |
| 10 | 21 | 76.58  | 97.09  | 172.61 | 3.70   | 2.55   |
| 10 | 22 | 23.78  | 145.82 | 27.48  | 7.17   | 3.77   |
| 10 | 23 | 151.28 | 28.49  | 22.39  | 36.89  | 31.01  |
| 10 | 24 | 159.91 | 124.98 | 8.80   | 17.00  | 32.39  |
| 10 | 25 | 7.59   | 60.58  | 92.09  | 31.89  | 26.07  |
| 10 | 26 | 63.51  | 23.94  | 9.58   | 4.89   | 13.39  |
| 10 | 27 | 47.12  | 54.61  | 4.28   | 24.03  | 17.36  |
| 10 | 28 | 43.99  | 109.14 | 19.05  | 4.50   | 14.40  |
| 10 | 29 | 10.83  | 13.68  | 46.04  | 12.26  | 37.52  |

|    |    |        |        |        |        |        |
|----|----|--------|--------|--------|--------|--------|
| 10 | 30 | 176.31 | 131.21 | 23.44  | 9.34   | 7.33   |
| 11 | 0  | 237.87 | 145.50 | 50.75  | 184.13 | 189.88 |
| 11 | 1  | 93.97  | 225.12 | 33.60  | 113.91 | 68.04  |
| 11 | 2  | 66.46  | 122.92 | 30.56  | 63.98  | 50.93  |
| 11 | 3  | 39.11  | 172.70 | 27.26  | 170.54 | 306.57 |
| 11 | 4  | 6.78   | 287.62 | 575.06 | 475.55 | 86.00  |
| 11 | 5  | 585.32 | 86.70  | 424.85 | 18.50  | 18.90  |
| 11 | 6  | 36.16  | 172.36 | 271.49 | 50.13  | 100.97 |
| 11 | 7  | 123.65 | 163.93 | 108.69 | 376.44 | 280.02 |
| 11 | 8  | 192.44 | 110.18 | 47.05  | 150.20 | 263.81 |
| 11 | 9  | 391.13 | 63.41  | 54.79  | 173.67 | 150.55 |
| 11 | 10 | 207.99 | 4.62   | 150.88 | 375.32 | 282.30 |
| 11 | 11 | 307.21 | 131.42 | 6.58   | 174.38 | 252.82 |
| 11 | 12 | 103.43 | 89.00  | 49.14  | 242.68 | 126.32 |
| 11 | 13 | 86.62  | 147.27 | 18.52  | 29.24  | 111.59 |
| 11 | 14 | 100.11 | 120.16 | 7.19   | 40.09  | 28.38  |
| 11 | 15 | 120.25 | 115.02 | 9.05   | 217.91 | 91.93  |
| 11 | 16 | 147.52 | 69.00  | 16.39  | 45.48  | 236.72 |
| 11 | 17 | 132.97 | 99.06  | 67.73  | 14.64  | 66.48  |
| 11 | 18 | 42.37  | 9.99   | 19.63  | 62.52  | 179.96 |
| 11 | 19 | 144.97 | 45.08  | 12.14  | 47.97  | 110.11 |
| 11 | 20 | 76.16  | 58.58  | 44.96  | 46.06  | 177.06 |
| 11 | 21 | 74.13  | 46.54  | 47.73  | 4.79   | 16.14  |
| 11 | 22 | 15.95  | 69.75  | 5.22   | 29.00  | 15.78  |
| 11 | 23 | 96.53  | 61.63  | 55.79  | 123.70 | 157.61 |
| 11 | 24 | 44.64  | 68.38  | 15.31  | 37.44  | 150.60 |
| 11 | 25 | 3.81   | 47.21  | 34.78  | 118.28 | 108.46 |
| 11 | 26 | 46.25  | 19.08  | 30.90  | 8.36   | 27.69  |
| 11 | 27 | 24.14  | 34.95  | 7.15   | 56.71  | 38.72  |
| 11 | 28 | 37.56  | 22.23  | 10.87  | 13.65  | 62.86  |
| 11 | 29 | 52.91  | 7.23   | 15.24  | 25.07  | 217.80 |
| 11 | 30 | 73.46  | 88.19  | 10.48  | 31.30  | 41.07  |
| 12 | 0  | 110.28 | 177.18 | 29.97  | 154.54 | 277.38 |
| 12 | 1  | 8.32   | 127.57 | 41.98  | 50.52  | 27.43  |
| 12 | 2  | 18.97  | 63.48  | 33.59  | 42.73  | 25.75  |
| 12 | 3  | 12.62  | 340.72 | 32.63  | 148.45 | 80.02  |
| 12 | 4  | 2.28   | 558.20 | 58.46  | 390.53 | 139.37 |
| 12 | 5  | 295.10 | 140.71 | 102.97 | 65.56  | 32.96  |
| 12 | 6  | 35.67  | 89.50  | 129.43 | 16.28  | 70.70  |
| 12 | 7  | 272.86 | 39.56  | 41.36  | 212.83 | 75.15  |
| 12 | 8  | 292.76 | 87.21  | 11.41  | 421.50 | 541.55 |
| 12 | 9  | 119.78 | 38.90  | 35.63  | 88.71  | 218.88 |
| 12 | 10 | 247.83 | 60.01  | 121.05 | 372.80 | 213.90 |
| 12 | 11 | 342.84 | 158.21 | 7.21   | 194.61 | 141.12 |

|    |    |        |        |        |        |        |
|----|----|--------|--------|--------|--------|--------|
| 12 | 12 | 480.96 | 143.54 | 6.47   | 310.76 | 62.38  |
| 12 | 13 | 124.15 | 289.40 | 25.25  | 62.48  | 87.78  |
| 12 | 14 | 122.62 | 275.69 | 3.73   | 71.06  | 99.12  |
| 12 | 15 | 65.23  | 88.35  | 8.90   | 351.47 | 232.63 |
| 12 | 16 | 152.56 | 52.08  | 11.46  | 41.94  | 422.47 |
| 12 | 17 | 125.92 | 77.21  | 42.17  | 15.79  | 132.16 |
| 12 | 18 | 47.68  | 21.38  | 37.11  | 43.44  | 94.16  |
| 12 | 19 | 85.03  | 53.98  | 5.88   | 73.47  | 264.07 |
| 12 | 20 | 181.70 | 51.96  | 35.08  | 44.73  | 188.30 |
| 12 | 21 | 72.99  | 46.02  | 31.82  | 16.10  | 23.92  |
| 12 | 22 | 56.83  | 34.13  | 0.94   | 14.64  | 10.23  |
| 12 | 23 | 156.63 | 97.82  | 43.70  | 111.30 | 169.11 |
| 12 | 24 | 97.22  | 35.49  | 11.60  | 45.65  | 177.71 |
| 12 | 25 | 20.18  | 51.16  | 29.37  | 85.33  | 63.31  |
| 12 | 26 | 44.86  | 16.54  | 6.17   | 27.36  | 28.35  |
| 12 | 27 | 40.65  | 26.32  | 2.82   | 87.60  | 68.22  |
| 12 | 28 | 50.18  | 57.93  | 7.88   | 33.93  | 34.46  |
| 12 | 29 | 18.40  | 14.54  | 9.33   | 41.27  | 126.15 |
| 12 | 30 | 94.80  | 89.06  | 1.12   | 13.41  | 26.35  |
| 13 | 0  | 297.77 | 80.78  | 260.59 | 254.09 | 178.78 |
| 13 | 1  | 6.27   | 94.85  | 9.45   | 18.29  | 48.83  |
| 13 | 2  | 3.41   | 76.88  | 12.77  | 3.32   | 18.11  |
| 13 | 3  | 14.76  | 51.22  | 8.08   | 50.83  | 98.71  |
| 13 | 4  | 2.15   | 122.21 | 121.62 | 135.38 | 46.43  |
| 13 | 5  | 159.38 | 39.92  | 105.52 | 18.92  | 11.86  |
| 13 | 6  | 2.56   | 182.57 | 134.82 | 186.31 | 93.54  |
| 13 | 7  | 481.06 | 137.04 | 23.59  | 83.34  | 48.14  |
| 13 | 8  | 430.43 | 216.16 | 9.08   | 31.33  | 24.90  |
| 13 | 9  | 148.77 | 456.85 | 59.92  | 568.43 | 309.41 |
| 13 | 10 | 110.60 | 79.46  | 143.45 | 168.09 | 84.27  |
| 13 | 11 | 65.54  | 143.26 | 71.66  | 120.47 | 108.22 |
| 13 | 12 | 155.98 | 371.01 | 5.15   | 54.73  | 46.29  |
| 13 | 13 | 505.89 | 406.16 | 258.93 | 16.54  | 39.72  |
| 13 | 14 | 36.51  | 104.66 | 9.99   | 35.69  | 30.50  |
| 13 | 15 | 115.64 | 148.33 | 27.90  | 85.81  | 73.06  |
| 13 | 16 | 86.43  | 178.55 | 30.85  | 463.74 | 108.48 |
| 13 | 17 | 156.16 | 138.09 | 154.02 | 45.68  | 20.58  |
| 13 | 18 | 62.12  | 43.06  | 466.21 | 78.55  | 55.20  |
| 13 | 19 | 191.15 | 30.58  | 62.63  | 277.71 | 186.91 |
| 13 | 20 | 172.55 | 97.06  | 296.87 | 167.48 | 103.25 |
| 13 | 21 | 87.61  | 28.46  | 283.22 | 19.26  | 7.59   |
| 13 | 22 | 22.05  | 73.25  | 4.02   | 11.55  | 1.82   |
| 13 | 23 | 87.31  | 92.29  | 269.14 | 234.05 | 157.24 |
| 13 | 24 | 75.28  | 67.67  | 69.74  | 54.77  | 34.36  |

|    |    |        |        |        |        |        |
|----|----|--------|--------|--------|--------|--------|
| 13 | 25 | 1.91   | 47.99  | 191.66 | 26.62  | 16.08  |
| 13 | 26 | 44.34  | 25.78  | 11.00  | 15.94  | 10.32  |
| 13 | 27 | 26.22  | 34.66  | 18.13  | 64.17  | 35.96  |
| 13 | 28 | 27.39  | 49.11  | 73.98  | 9.64   | 16.77  |
| 13 | 29 | 34.49  | 4.23   | 44.96  | 74.75  | 64.31  |
| 13 | 30 | 105.16 | 81.99  | 17.19  | 51.60  | 31.73  |
| 14 | 0  | 18.21  | 321.26 | 103.80 | 71.19  | 57.11  |
| 14 | 1  | 12.71  | 19.87  | 27.57  | 13.07  | 43.32  |
| 14 | 2  | 29.21  | 22.67  | 15.15  | 18.67  | 36.81  |
| 14 | 3  | 31.33  | 107.78 | 8.34   | 23.06  | 75.40  |
| 14 | 4  | 2.61   | 162.96 | 267.67 | 46.27  | 14.29  |
| 14 | 5  | 26.20  | 35.16  | 332.37 | 39.21  | 34.01  |
| 14 | 6  | 4.46   | 75.86  | 442.81 | 568.62 | 260.10 |
| 14 | 7  | 46.51  | 53.47  | 123.59 | 30.48  | 196.66 |
| 14 | 8  | 28.64  | 495.01 | 29.05  | 49.70  | 191.24 |
| 14 | 9  | 8.74   | 141.08 | 71.03  | 161.40 | 518.02 |
| 14 | 10 | 24.40  | 131.04 | 384.60 | 293.05 | 158.59 |
| 14 | 11 | 22.46  | 385.29 | 55.40  | 127.17 | 342.08 |
| 14 | 12 | 43.22  | 30.19  | 13.54  | 130.30 | 90.57  |
| 14 | 13 | 7.34   | 78.17  | 77.31  | 43.61  | 167.07 |
| 14 | 14 | 49.65  | 24.76  | 15.93  | 51.63  | 142.32 |
| 14 | 15 | 71.54  | 365.77 | 37.39  | 231.17 | 266.21 |
| 14 | 16 | 37.61  | 153.44 | 33.01  | 115.15 | 80.44  |
| 14 | 17 | 66.58  | 230.50 | 52.27  | 4.41   | 20.91  |
| 14 | 18 | 19.55  | 12.85  | 197.58 | 26.09  | 68.20  |
| 14 | 19 | 21.39  | 313.77 | 25.32  | 45.66  | 79.93  |
| 14 | 20 | 42.91  | 88.33  | 90.07  | 51.83  | 91.45  |
| 14 | 21 | 14.59  | 149.86 | 156.16 | 9.10   | 21.57  |
| 14 | 22 | 7.03   | 211.74 | 6.26   | 10.04  | 10.00  |
| 14 | 23 | 25.34  | 87.85  | 74.66  | 28.93  | 34.57  |
| 14 | 24 | 14.01  | 58.41  | 23.72  | 14.48  | 77.65  |
| 14 | 25 | 3.27   | 71.25  | 90.00  | 44.49  | 40.24  |
| 14 | 26 | 5.70   | 21.49  | 15.84  | 19.68  | 22.54  |
| 14 | 27 | 6.81   | 34.21  | 5.08   | 29.13  | 18.61  |
| 14 | 28 | 8.32   | 117.52 | 14.87  | 5.96   | 17.55  |
| 14 | 29 | 4.54   | 17.80  | 21.30  | 20.82  | 63.78  |
| 14 | 30 | 19.20  | 93.35  | 26.23  | 21.04  | 10.65  |
| 15 | 0  | 220.40 | 68.88  | 66.53  | 283.81 | 105.15 |
| 15 | 1  | 24.18  | 68.32  | 12.35  | 15.61  | 31.67  |
| 15 | 2  | 6.53   | 49.96  | 7.87   | 13.34  | 20.54  |
| 15 | 3  | 37.33  | 71.67  | 5.23   | 66.65  | 64.27  |
| 15 | 4  | 15.87  | 57.46  | 34.38  | 180.57 | 74.44  |
| 15 | 5  | 603.22 | 26.53  | 397.90 | 20.33  | 9.96   |
| 15 | 6  | 18.87  | 133.53 | 505.81 | 46.71  | 65.26  |

|    |    |        |        |        |        |        |
|----|----|--------|--------|--------|--------|--------|
| 15 | 7  | 209.23 | 78.66  | 70.02  | 63.33  | 543.09 |
| 15 | 8  | 318.91 | 91.05  | 36.99  | 31.59  | 71.10  |
| 15 | 9  | 30.96  | 105.94 | 482.58 | 216.21 | 207.69 |
| 15 | 10 | 115.25 | 97.57  | 95.06  | 58.78  | 106.83 |
| 15 | 11 | 57.89  | 132.02 | 23.66  | 24.85  | 256.85 |
| 15 | 12 | 197.40 | 278.72 | 7.70   | 14.32  | 120.13 |
| 15 | 13 | 59.79  | 278.78 | 12.39  | 37.24  | 114.85 |
| 15 | 14 | 102.64 | 395.68 | 22.12  | 198.38 | 175.40 |
| 15 | 15 | 131.01 | 305.21 | 75.72  | 119.84 | 229.93 |
| 15 | 16 | 234.60 | 272.13 | 48.52  | 121.28 | 102.61 |
| 15 | 17 | 184.70 | 383.24 | 52.30  | 28.79  | 25.09  |
| 15 | 18 | 28.98  | 41.33  | 40.83  | 250.59 | 208.77 |
| 15 | 19 | 232.18 | 62.67  | 7.83   | 135.73 | 92.83  |
| 15 | 20 | 187.66 | 148.60 | 79.44  | 259.52 | 132.26 |
| 15 | 21 | 153.66 | 71.92  | 48.76  | 10.56  | 11.65  |
| 15 | 22 | 15.59  | 107.35 | 4.02   | 70.93  | 32.45  |
| 15 | 23 | 103.23 | 42.60  | 28.37  | 276.54 | 161.67 |
| 15 | 24 | 91.90  | 10.49  | 10.01  | 178.12 | 158.45 |
| 15 | 25 | 2.89   | 106.19 | 43.11  | 371.01 | 263.57 |
| 15 | 26 | 16.36  | 15.89  | 9.31   | 53.91  | 33.57  |
| 15 | 27 | 38.23  | 15.47  | 2.67   | 78.41  | 34.81  |
| 15 | 28 | 52.03  | 112.76 | 9.34   | 25.78  | 40.23  |
| 15 | 29 | 58.08  | 9.80   | 19.57  | 285.58 | 139.46 |
| 15 | 30 | 84.38  | 93.46  | 22.67  | 134.95 | 23.82  |
| 16 | 0  | 216.46 | 85.99  | 196.01 | 71.15  | 92.42  |
| 16 | 1  | 7.05   | 7.95   | 5.32   | 9.64   | 41.44  |
| 16 | 2  | 8.12   | 10.38  | 2.80   | 22.48  | 33.75  |
| 16 | 3  | 12.25  | 29.15  | 3.41   | 57.29  | 52.93  |
| 16 | 4  | 5.78   | 39.47  | 9.31   | 79.73  | 55.00  |
| 16 | 5  | 42.77  | 79.99  | 46.60  | 28.85  | 18.95  |
| 16 | 6  | 23.64  | 166.70 | 75.97  | 401.83 | 232.49 |
| 16 | 7  | 534.42 | 406.21 | 10.55  | 178.12 | 149.76 |
| 16 | 8  | 305.44 | 211.34 | 5.20   | 183.24 | 103.48 |
| 16 | 9  | 77.65  | 152.91 | 56.35  | 24.79  | 127.43 |
| 16 | 10 | 65.35  | 18.36  | 30.86  | 7.88   | 325.16 |
| 16 | 11 | 119.11 | 152.26 | 657.02 | 50.16  | 258.69 |
| 16 | 12 | 66.53  | 240.01 | 9.85   | 157.85 | 385.21 |
| 16 | 13 | 334.83 | 204.39 | 155.36 | 55.46  | 124.35 |
| 16 | 14 | 73.17  | 86.64  | 61.55  | 420.25 | 152.73 |
| 16 | 15 | 260.63 | 208.28 | 522.69 | 126.44 | 124.60 |
| 16 | 16 | 114.74 | 202.45 | 28.59  | 78.29  | 133.77 |
| 16 | 17 | 331.73 | 162.59 | 105.13 | 46.52  | 52.84  |
| 16 | 18 | 53.97  | 12.39  | 147.88 | 431.79 | 465.36 |
| 16 | 19 | 114.34 | 96.48  | 36.60  | 112.46 | 106.93 |

|    |    |        |        |        |        |        |
|----|----|--------|--------|--------|--------|--------|
| 16 | 20 | 201.46 | 38.97  | 257.45 | 125.10 | 167.00 |
| 16 | 21 | 124.60 | 48.45  | 72.92  | 62.55  | 10.43  |
| 16 | 22 | 32.40  | 57.51  | 8.41   | 121.38 | 6.30   |
| 16 | 23 | 43.67  | 52.65  | 54.66  | 66.20  | 94.59  |
| 16 | 24 | 38.96  | 48.16  | 9.93   | 73.91  | 124.38 |
| 16 | 25 | 3.83   | 34.82  | 45.48  | 123.45 | 95.28  |
| 16 | 26 | 61.96  | 14.02  | 7.49   | 22.61  | 55.55  |
| 16 | 27 | 49.52  | 22.72  | 4.61   | 17.34  | 42.89  |
| 16 | 28 | 38.79  | 39.53  | 24.76  | 23.73  | 21.08  |
| 16 | 29 | 32.71  | 6.28   | 85.20  | 58.22  | 47.40  |
| 16 | 30 | 67.45  | 36.95  | 56.43  | 27.40  | 12.49  |
| 17 | 0  | 105.93 | 237.56 | 277.65 | 33.33  | 232.81 |
| 17 | 1  | 24.60  | 12.86  | 13.35  | 26.38  | 13.57  |
| 17 | 2  | 30.16  | 11.68  | 7.40   | 30.42  | 13.06  |
| 17 | 3  | 19.51  | 24.38  | 2.25   | 61.61  | 48.26  |
| 17 | 4  | 8.72   | 40.93  | 53.12  | 70.43  | 50.61  |
| 17 | 5  | 28.45  | 37.98  | 112.44 | 32.54  | 6.94   |
| 17 | 6  | 7.40   | 87.03  | 172.16 | 456.86 | 271.50 |
| 17 | 7  | 117.95 | 270.06 | 47.73  | 191.52 | 202.45 |
| 17 | 8  | 117.70 | 431.29 | 17.98  | 198.20 | 524.13 |
| 17 | 9  | 48.32  | 178.68 | 100.70 | 118.67 | 172.75 |
| 17 | 10 | 16.76  | 82.07  | 155.29 | 23.69  | 100.37 |
| 17 | 11 | 191.20 | 274.60 | 216.07 | 38.29  | 54.77  |
| 17 | 12 | 115.68 | 91.45  | 12.64  | 184.50 | 92.97  |
| 17 | 13 | 68.60  | 148.68 | 82.93  | 50.34  | 37.25  |
| 17 | 14 | 233.31 | 180.66 | 14.04  | 361.62 | 108.61 |
| 17 | 15 | 486.36 | 215.85 | 96.57  | 76.01  | 94.91  |
| 17 | 16 | 370.15 | 161.75 | 37.85  | 79.35  | 245.70 |
| 17 | 17 | 347.54 | 287.28 | 245.75 | 40.71  | 63.80  |
| 17 | 18 | 136.75 | 16.01  | 159.25 | 374.53 | 292.57 |
| 17 | 19 | 118.52 | 261.16 | 26.36  | 137.00 | 256.62 |
| 17 | 20 | 197.65 | 135.33 | 194.73 | 121.46 | 285.45 |
| 17 | 21 | 51.42  | 113.11 | 374.81 | 57.38  | 49.39  |
| 17 | 22 | 19.87  | 222.51 | 29.58  | 104.86 | 10.75  |
| 17 | 23 | 105.59 | 59.25  | 370.48 | 38.01  | 57.40  |
| 17 | 24 | 70.34  | 58.13  | 76.65  | 26.72  | 167.85 |
| 17 | 25 | 6.28   | 70.70  | 402.16 | 99.68  | 56.29  |
| 17 | 26 | 1.99   | 24.99  | 43.31  | 15.15  | 16.62  |
| 17 | 27 | 33.60  | 24.57  | 10.64  | 21.34  | 64.02  |
| 17 | 28 | 59.52  | 101.76 | 64.98  | 23.71  | 14.85  |
| 17 | 29 | 26.35  | 12.97  | 88.38  | 53.47  | 31.90  |
| 17 | 30 | 81.56  | 27.62  | 79.50  | 18.47  | 43.16  |
| 18 | 0  | 211.72 | 159.25 | 245.16 | 69.20  | 175.38 |
| 18 | 1  | 3.30   | 11.94  | 4.74   | 26.52  | 41.52  |



|    |    |        |        |        |        |        |
|----|----|--------|--------|--------|--------|--------|
| 18 | 2  | 9.23   | 28.46  | 6.91   | 11.89  | 8.13   |
| 18 | 3  | 15.26  | 73.12  | 6.89   | 40.08  | 56.54  |
| 18 | 4  | 15.74  | 16.86  | 8.68   | 59.62  | 28.33  |
| 18 | 5  | 188.69 | 96.92  | 8.44   | 20.46  | 26.90  |
| 18 | 6  | 60.70  | 196.68 | 34.44  | 358.55 | 37.12  |
| 18 | 7  | 292.25 | 458.63 | 19.22  | 86.37  | 158.05 |
| 18 | 8  | 468.23 | 304.32 | 6.85   | 102.38 | 162.42 |
| 18 | 9  | 356.94 | 381.82 | 45.15  | 88.94  | 136.14 |
| 18 | 10 | 207.33 | 97.96  | 52.48  | 185.44 | 375.16 |
| 18 | 11 | 309.30 | 202.78 | 595.56 | 168.75 | 112.69 |
| 18 | 12 | 103.86 | 71.64  | 2.10   | 1.68   | 324.45 |
| 18 | 13 | 98.30  | 29.66  | 193.00 | 16.60  | 135.89 |
| 18 | 14 | 69.13  | 93.22  | 41.09  | 34.14  | 47.86  |
| 18 | 15 | 31.11  | 152.89 | 304.63 | 54.06  | 81.48  |
| 18 | 16 | 102.54 | 214.84 | 32.34  | 37.61  | 125.35 |
| 18 | 17 | 74.94  | 175.22 | 128.13 | 7.53   | 42.17  |
| 18 | 18 | 20.11  | 20.70  | 295.88 | 104.66 | 276.43 |
| 18 | 19 | 71.30  | 138.83 | 59.40  | 81.15  | 101.35 |
| 18 | 20 | 106.92 | 29.92  | 318.46 | 44.40  | 173.47 |
| 18 | 21 | 25.83  | 22.32  | 235.92 | 11.92  | 19.96  |
| 18 | 22 | 56.16  | 19.19  | 21.20  | 8.19   | 10.36  |
| 18 | 23 | 108.74 | 68.68  | 20.76  | 57.12  | 205.62 |
| 18 | 24 | 50.84  | 24.26  | 9.84   | 24.73  | 196.86 |
| 18 | 25 | 19.85  | 33.13  | 137.69 | 41.53  | 52.59  |
| 18 | 26 | 42.86  | 26.95  | 17.38  | 8.44   | 63.84  |
| 18 | 27 | 15.67  | 24.26  | 5.39   | 34.00  | 33.48  |
| 18 | 28 | 40.26  | 23.69  | 25.96  | 1.76   | 61.77  |
| 18 | 29 | 17.31  | 7.04   | 50.63  | 32.89  | 189.06 |
| 18 | 30 | 112.24 | 56.77  | 36.08  | 16.50  | 48.60  |
| 19 | 0  | 116.62 | 145.99 | 284.77 | 255.45 | 78.64  |
| 19 | 1  | 28.80  | 7.79   | 4.85   | 9.31   | 17.48  |
| 19 | 2  | 9.23   | 14.43  | 10.17  | 7.49   | 24.07  |
| 19 | 3  | 14.80  | 29.95  | 6.90   | 12.23  | 37.78  |
| 19 | 4  | 22.41  | 51.42  | 15.03  | 18.56  | 26.71  |
| 19 | 5  | 55.43  | 18.48  | 18.39  | 10.12  | 28.24  |
| 19 | 6  | 49.06  | 145.80 | 16.99  | 96.89  | 96.51  |
| 19 | 7  | 202.11 | 114.37 | 7.88   | 39.32  | 422.41 |
| 19 | 8  | 204.12 | 304.62 | 3.76   | 50.19  | 176.02 |
| 19 | 9  | 340.22 | 59.37  | 19.42  | 606.14 | 386.65 |
| 19 | 10 | 177.35 | 88.15  | 26.68  | 154.05 | 270.11 |
| 19 | 11 | 126.05 | 513.50 | 276.40 | 86.11  | 89.82  |
| 19 | 12 | 239.60 | 260.43 | 18.53  | 31.44  | 59.86  |
| 19 | 13 | 17.65  | 147.20 | 617.79 | 16.00  | 46.78  |
| 19 | 14 | 102.47 | 260.60 | 11.46  | 57.58  | 56.62  |

|    |    |        |        |        |        |        |
|----|----|--------|--------|--------|--------|--------|
| 19 | 15 | 194.85 | 31.76  | 138.04 | 205.37 | 79.76  |
| 19 | 16 | 209.58 | 207.81 | 20.74  | 292.15 | 51.60  |
| 19 | 17 | 166.67 | 82.25  | 142.54 | 24.54  | 26.93  |
| 19 | 18 | 82.26  | 39.07  | 406.78 | 174.17 | 168.60 |
| 19 | 19 | 186.72 | 106.14 | 39.77  | 279.74 | 86.20  |
| 19 | 20 | 164.11 | 147.15 | 366.57 | 207.70 | 47.37  |
| 19 | 21 | 142.86 | 93.64  | 205.44 | 25.70  | 13.56  |
| 19 | 22 | 57.91  | 62.83  | 10.52  | 25.25  | 5.72   |
| 19 | 23 | 275.92 | 15.24  | 135.74 | 142.47 | 121.52 |
| 19 | 24 | 271.79 | 93.18  | 41.01  | 83.11  | 86.29  |
| 19 | 25 | 13.90  | 144.62 | 126.19 | 165.22 | 64.79  |
| 19 | 26 | 59.84  | 19.07  | 13.55  | 33.04  | 28.18  |
| 19 | 27 | 25.85  | 22.17  | 9.53   | 122.74 | 61.33  |
| 19 | 28 | 22.96  | 50.09  | 47.57  | 13.84  | 29.20  |
| 19 | 29 | 11.42  | 12.91  | 43.19  | 32.91  | 92.60  |
| 19 | 30 | 179.97 | 109.92 | 61.05  | 66.82  | 31.36  |
| 20 | 0  | 131.24 | 47.02  | 22.54  | 80.56  | 10.46  |
| 20 | 1  | 8.81   | 25.28  | 5.77   | 9.44   | 12.26  |
| 20 | 2  | 2.56   | 4.79   | 4.05   | 5.54   | 14.47  |
| 20 | 3  | 9.90   | 13.66  | 4.67   | 10.82  | 5.70   |
| 20 | 4  | 11.14  | 18.69  | 48.68  | 11.67  | 8.80   |
| 20 | 5  | 39.46  | 31.59  | 38.60  | 12.80  | 3.31   |
| 20 | 6  | 24.61  | 49.04  | 44.25  | 67.10  | 6.55   |
| 20 | 7  | 9.15   | 165.67 | 37.49  | 48.05  | 40.08  |
| 20 | 8  | 75.94  | 81.69  | 9.50   | 39.23  | 9.01   |
| 20 | 9  | 49.26  | 77.31  | 28.50  | 103.32 | 63.50  |
| 20 | 10 | 332.59 | 25.07  | 33.63  | 216.60 | 75.91  |
| 20 | 11 | 214.49 | 60.90  | 9.99   | 543.53 | 146.23 |
| 20 | 12 | 83.65  | 116.34 | 0.83   | 39.42  | 24.01  |
| 20 | 13 | 59.19  | 126.42 | 31.76  | 12.34  | 6.74   |
| 20 | 14 | 178.09 | 71.10  | 0.69   | 47.10  | 10.80  |
| 20 | 15 | 225.73 | 47.97  | 4.65   | 138.69 | 41.09  |
| 20 | 16 | 86.74  | 12.10  | 2.21   | 56.15  | 26.30  |
| 20 | 17 | 199.06 | 43.96  | 12.05  | 36.51  | 15.94  |
| 20 | 18 | 32.64  | 7.12   | 19.82  | 413.09 | 167.24 |
| 20 | 19 | 120.57 | 66.03  | 1.24   | 134.28 | 33.73  |
| 20 | 20 | 98.91  | 22.04  | 22.61  | 130.64 | 16.47  |
| 20 | 21 | 81.26  | 29.33  | 12.20  | 21.81  | 7.85   |
| 20 | 22 | 29.78  | 56.19  | 1.14   | 33.69  | 21.34  |
| 20 | 23 | 338.03 | 68.71  | 25.33  | 185.53 | 42.21  |
| 20 | 24 | 309.57 | 55.19  | 7.06   | 31.59  | 19.20  |
| 20 | 25 | 9.36   | 45.85  | 22.14  | 167.69 | 91.27  |
| 20 | 26 | 95.65  | 15.35  | 1.66   | 37.89  | 16.09  |
| 20 | 27 | 20.96  | 23.57  | 0.93   | 86.10  | 24.21  |

|    |    |        |        |        |        |        |
|----|----|--------|--------|--------|--------|--------|
| 20 | 28 | 26.38  | 52.62  | 6.19   | 11.40  | 2.34   |
| 20 | 29 | 32.26  | 6.91   | 3.28   | 84.24  | 6.67   |
| 20 | 30 | 173.93 | 41.29  | 5.02   | 44.00  | 5.72   |
| 21 | 0  | 87.62  | 123.36 | 184.04 | 117.25 | 254.63 |
| 21 | 1  | 16.20  | 26.61  | 6.95   | 7.39   | 22.69  |
| 21 | 2  | 14.27  | 11.79  | 6.19   | 3.60   | 16.74  |
| 21 | 3  | 18.57  | 33.33  | 4.51   | 13.97  | 35.74  |
| 21 | 4  | 16.19  | 35.83  | 11.38  | 61.03  | 29.38  |
| 21 | 5  | 63.30  | 38.43  | 37.06  | 8.30   | 8.21   |
| 21 | 6  | 29.48  | 43.20  | 39.53  | 13.92  | 41.81  |
| 21 | 7  | 37.13  | 158.11 | 7.45   | 48.93  | 20.45  |
| 21 | 8  | 82.13  | 103.05 | 2.36   | 28.16  | 88.85  |
| 21 | 9  | 67.15  | 55.55  | 29.94  | 128.46 | 29.41  |
| 21 | 10 | 427.04 | 16.81  | 30.19  | 45.89  | 146.05 |
| 21 | 11 | 147.40 | 91.22  | 44.28  | 174.11 | 95.67  |
| 21 | 12 | 57.98  | 135.30 | 7.56   | 22.44  | 20.48  |
| 21 | 13 | 23.76  | 107.26 | 113.65 | 6.34   | 41.40  |
| 21 | 14 | 272.40 | 100.94 | 4.47   | 72.09  | 59.04  |
| 21 | 15 | 227.60 | 96.67  | 41.06  | 31.56  | 48.41  |
| 21 | 16 | 290.72 | 1.04   | 82.98  | 93.92  | 79.07  |
| 21 | 17 | 177.16 | 64.17  | 592.61 | 13.02  | 11.48  |
| 21 | 18 | 115.50 | 4.94   | 210.58 | 139.04 | 96.70  |
| 21 | 19 | 122.79 | 158.81 | 40.91  | 207.79 | 457.15 |
| 21 | 20 | 123.21 | 23.94  | 115.98 | 494.79 | 167.25 |
| 21 | 21 | 48.29  | 12.65  | 354.61 | 62.18  | 33.29  |
| 21 | 22 | 25.50  | 57.57  | 28.41  | 80.22  | 12.07  |
| 21 | 23 | 189.61 | 318.03 | 387.84 | 243.08 | 271.12 |
| 21 | 24 | 193.98 | 218.23 | 82.51  | 116.13 | 394.13 |
| 21 | 25 | 18.91  | 184.14 | 316.21 | 473.46 | 284.71 |
| 21 | 26 | 72.66  | 30.49  | 32.90  | 111.62 | 205.02 |
| 21 | 27 | 43.00  | 27.85  | 13.76  | 287.23 | 220.00 |
| 21 | 28 | 48.45  | 110.85 | 71.44  | 30.16  | 60.46  |
| 21 | 29 | 24.54  | 11.21  | 47.66  | 171.46 | 203.13 |
| 21 | 30 | 93.10  | 97.71  | 66.13  | 90.12  | 71.79  |
| 22 | 0  | 183.89 | 134.41 | 208.35 | 201.50 | 65.81  |
| 22 | 1  | 3.71   | 13.44  | 9.21   | 10.26  | 28.59  |
| 22 | 2  | 4.66   | 3.81   | 8.20   | 12.86  | 13.24  |
| 22 | 3  | 8.57   | 29.20  | 5.09   | 22.36  | 88.88  |
| 22 | 4  | 4.61   | 70.07  | 10.87  | 107.39 | 34.96  |
| 22 | 5  | 71.00  | 13.25  | 13.38  | 18.07  | 23.10  |
| 22 | 6  | 18.35  | 52.70  | 13.49  | 19.87  | 80.80  |
| 22 | 7  | 104.64 | 127.14 | 10.46  | 65.78  | 16.80  |
| 22 | 8  | 49.62  | 55.78  | 5.30   | 14.65  | 59.41  |
| 22 | 9  | 87.37  | 126.17 | 17.24  | 47.67  | 21.39  |

|    |    |        |        |        |        |        |
|----|----|--------|--------|--------|--------|--------|
| 22 | 10 | 257.42 | 51.00  | 9.48   | 50.29  | 59.50  |
| 22 | 11 | 126.45 | 213.53 | 105.70 | 32.36  | 52.58  |
| 22 | 12 | 34.92  | 167.35 | 14.57  | 14.97  | 40.77  |
| 22 | 13 | 20.97  | 181.68 | 732.20 | 6.71   | 7.18   |
| 22 | 14 | 149.26 | 52.54  | 18.68  | 30.58  | 33.30  |
| 22 | 15 | 38.34  | 72.12  | 36.27  | 78.28  | 59.98  |
| 22 | 16 | 101.59 | 37.80  | 33.87  | 50.18  | 45.56  |
| 22 | 17 | 158.16 | 118.67 | 149.76 | 9.31   | 11.57  |
| 22 | 18 | 39.58  | 23.97  | 131.15 | 86.44  | 57.57  |
| 22 | 19 | 427.34 | 117.85 | 64.17  | 216.69 | 161.75 |
| 22 | 20 | 180.97 | 52.16  | 198.59 | 134.89 | 261.92 |
| 22 | 21 | 196.32 | 129.90 | 213.17 | 30.33  | 55.49  |
| 22 | 22 | 24.88  | 138.93 | 9.54   | 35.89  | 9.38   |
| 22 | 23 | 328.27 | 443.74 | 273.31 | 97.73  | 236.87 |
| 22 | 24 | 368.33 | 405.53 | 65.79  | 608.55 | 331.40 |
| 22 | 25 | 33.19  | 218.39 | 266.91 | 263.61 | 418.19 |
| 22 | 26 | 193.59 | 28.31  | 5.54   | 132.20 | 281.23 |
| 22 | 27 | 69.42  | 40.97  | 16.07  | 491.56 | 468.85 |
| 22 | 28 | 59.84  | 106.32 | 67.02  | 35.37  | 37.91  |
| 22 | 29 | 35.87  | 5.49   | 29.63  | 217.48 | 135.91 |
| 22 | 30 | 130.45 | 204.50 | 62.47  | 78.43  | 74.16  |
| 23 | 0  | 55.07  | 176.32 | 1.25   | 50.27  | 53.91  |
| 23 | 1  | 10.05  | 7.33   | 2.33   | 2.01   | 9.46   |
| 23 | 2  | 12.27  | 6.34   | 2.61   | 4.98   | 19.11  |
| 23 | 3  | 15.19  | 44.71  | 2.41   | 4.62   | 12.38  |
| 23 | 4  | 13.69  | 67.82  | 1.43   | 43.53  | 35.27  |
| 23 | 5  | 20.73  | 16.67  | 1.01   | 8.42   | 18.40  |
| 23 | 6  | 28.64  | 17.36  | 1.29   | 18.15  | 33.08  |
| 23 | 7  | 28.71  | 12.36  | 1.33   | 35.53  | 31.62  |
| 23 | 8  | 75.88  | 155.14 | 0.86   | 21.11  | 21.20  |
| 23 | 9  | 114.48 | 40.51  | 0.88   | 152.97 | 98.67  |
| 23 | 10 | 382.69 | 38.33  | 0.59   | 218.86 | 356.48 |
| 23 | 11 | 145.31 | 281.49 | 0.08   | 564.31 | 348.64 |
| 23 | 12 | 55.78  | 172.33 | 0.58   | 77.74  | 257.70 |
| 23 | 13 | 47.94  | 97.76  | 0.33   | 60.32  | 98.56  |
| 23 | 14 | 234.77 | 124.54 | 0.49   | 430.64 | 156.60 |
| 23 | 15 | 330.29 | 140.92 | 0.11   | 81.59  | 67.64  |
| 23 | 16 | 85.67  | 54.34  | 0.25   | 45.47  | 22.82  |
| 23 | 17 | 133.38 | 188.44 | 0.58   | 24.04  | 13.22  |
| 23 | 18 | 41.37  | 26.61  | 0.30   | 18.77  | 43.81  |
| 23 | 19 | 78.48  | 302.62 | 0.41   | 55.51  | 57.87  |
| 23 | 20 | 52.90  | 76.64  | 0.19   | 63.85  | 72.61  |
| 23 | 21 | 52.50  | 194.76 | 0.35   | 56.28  | 24.09  |
| 23 | 22 | 9.76   | 290.17 | 0.64   | 123.96 | 54.26  |

|    |    |        |        |        |        |        |
|----|----|--------|--------|--------|--------|--------|
| 23 | 23 | 88.93  | 233.97 | 0.53   | 74.85  | 81.38  |
| 23 | 24 | 31.28  | 287.37 | 0.43   | 37.43  | 53.56  |
| 23 | 25 | 6.00   | 179.44 | 0.47   | 34.59  | 52.21  |
| 23 | 26 | 30.01  | 21.42  | 0.53   | 23.20  | 48.70  |
| 23 | 27 | 35.93  | 81.43  | 0.75   | 20.99  | 37.06  |
| 23 | 28 | 12.31  | 65.40  | 0.49   | 25.35  | 16.58  |
| 23 | 29 | 6.18   | 11.16  | 0.29   | 50.24  | 34.84  |
| 23 | 30 | 42.20  | 117.54 | 0.35   | 24.03  | 13.47  |
| 24 | 0  | 94.43  | 106.10 | 223.84 | 23.06  | 55.39  |
| 24 | 1  | 1.70   | 21.62  | 4.88   | 4.32   | 11.02  |
| 24 | 2  | 2.96   | 10.99  | 5.52   | 6.65   | 12.60  |
| 24 | 3  | 6.86   | 23.05  | 4.23   | 11.43  | 32.58  |
| 24 | 4  | 0.71   | 43.77  | 8.71   | 14.98  | 21.02  |
| 24 | 5  | 47.84  | 23.90  | 14.68  | 2.02   | 16.70  |
| 24 | 6  | 4.64   | 72.98  | 28.69  | 19.83  | 41.78  |
| 24 | 7  | 94.46  | 89.93  | 11.84  | 14.11  | 81.44  |
| 24 | 8  | 54.97  | 40.23  | 4.29   | 13.14  | 33.57  |
| 24 | 9  | 67.57  | 43.58  | 42.10  | 47.14  | 74.77  |
| 24 | 10 | 31.92  | 28.21  | 2.14   | 55.77  | 351.53 |
| 24 | 11 | 52.05  | 115.16 | 76.22  | 194.61 | 188.95 |
| 24 | 12 | 33.70  | 24.97  | 11.40  | 30.04  | 243.78 |
| 24 | 13 | 37.54  | 30.78  | 113.06 | 19.18  | 97.73  |
| 24 | 14 | 38.43  | 59.36  | 5.86   | 142.93 | 51.02  |
| 24 | 15 | 31.33  | 45.75  | 39.17  | 26.38  | 38.96  |
| 24 | 16 | 28.43  | 43.06  | 81.68  | 16.30  | 39.25  |
| 24 | 17 | 76.61  | 127.17 | 510.30 | 8.18   | 12.61  |
| 24 | 18 | 56.30  | 23.32  | 216.27 | 8.50   | 23.24  |
| 24 | 19 | 438.84 | 438.06 | 8.36   | 23.35  | 44.19  |
| 24 | 20 | 215.13 | 61.88  | 112.66 | 22.33  | 52.22  |
| 24 | 21 | 224.44 | 207.79 | 129.45 | 18.65  | 18.11  |
| 24 | 22 | 38.55  | 287.27 | 9.81   | 40.62  | 18.50  |
| 24 | 23 | 308.49 | 385.24 | 159.28 | 21.74  | 74.31  |
| 24 | 24 | 114.33 | 146.79 | 26.04  | 27.61  | 35.41  |
| 24 | 25 | 35.01  | 176.18 | 300.96 | 14.76  | 84.36  |
| 24 | 26 | 362.03 | 12.21  | 28.02  | 6.02   | 63.01  |
| 24 | 27 | 211.56 | 26.98  | 37.17  | 14.93  | 95.96  |
| 24 | 28 | 182.42 | 177.30 | 145.38 | 8.55   | 22.95  |
| 24 | 29 | 34.98  | 20.75  | 312.77 | 21.76  | 69.40  |
| 24 | 30 | 120.75 | 32.62  | 330.43 | 9.37   | 21.81  |
| 25 | 0  | 83.48  | 61.55  | 43.55  | 2.58   | 115.23 |
| 25 | 1  | 14.54  | 15.33  | 11.98  | 7.57   | 24.19  |
| 25 | 2  | 20.14  | 19.92  | 33.42  | 8.60   | 15.41  |
| 25 | 3  | 11.91  | 49.87  | 26.22  | 9.34   | 43.57  |
| 25 | 4  | 6.68   | 42.81  | 5.86   | 4.67   | 4.20   |

|    |    |        |        |        |        |        |
|----|----|--------|--------|--------|--------|--------|
| 25 | 5  | 96.21  | 22.99  | 9.15   | 7.11   | 18.05  |
| 25 | 6  | 1.01   | 91.47  | 16.43  | 9.34   | 63.60  |
| 25 | 7  | 45.08  | 43.07  | 8.71   | 11.50  | 22.87  |
| 25 | 8  | 76.67  | 36.92  | 1.85   | 5.84   | 70.19  |
| 25 | 9  | 104.18 | 34.22  | 17.42  | 5.34   | 29.83  |
| 25 | 10 | 30.46  | 17.23  | 6.39   | 13.90  | 14.66  |
| 25 | 11 | 55.04  | 19.93  | 54.59  | 8.91   | 25.60  |
| 25 | 12 | 40.93  | 54.54  | 5.04   | 8.64   | 39.75  |
| 25 | 13 | 34.94  | 51.53  | 95.19  | 1.00   | 42.02  |
| 25 | 14 | 8.64   | 105.36 | 11.46  | 5.36   | 60.07  |
| 25 | 15 | 39.51  | 51.08  | 32.44  | 3.08   | 71.71  |
| 25 | 16 | 3.40   | 44.66  | 54.29  | 1.69   | 16.29  |
| 25 | 17 | 28.83  | 29.12  | 329.51 | 1.16   | 19.43  |
| 25 | 18 | 21.55  | 5.15   | 102.70 | 7.24   | 143.53 |
| 25 | 19 | 250.46 | 155.67 | 15.98  | 6.61   | 334.52 |
| 25 | 20 | 44.60  | 52.86  | 90.48  | 3.30   | 51.81  |
| 25 | 21 | 50.23  | 96.54  | 73.58  | 2.11   | 27.00  |
| 25 | 22 | 26.70  | 170.50 | 13.28  | 1.34   | 10.92  |
| 25 | 23 | 110.51 | 126.18 | 94.85  | 8.18   | 300.65 |
| 25 | 24 | 211.18 | 218.22 | 37.02  | 7.37   | 284.27 |
| 25 | 25 | 42.87  | 504.81 | 190.33 | 5.76   | 226.42 |
| 25 | 26 | 489.95 | 71.77  | 53.39  | 2.55   | 200.32 |
| 25 | 27 | 357.24 | 248.49 | 63.80  | 7.97   | 109.75 |
| 25 | 28 | 341.59 | 462.80 | 284.28 | 1.04   | 32.01  |
| 25 | 29 | 80.23  | 47.60  | 489.71 | 2.89   | 115.24 |
| 25 | 30 | 182.84 | 258.49 | 388.56 | 2.08   | 87.80  |
| 26 | 0  | 155.25 | 5.21   | 55.80  | 136.76 | 93.06  |
| 26 | 1  | 6.00   | 22.29  | 46.85  | 19.65  | 11.26  |
| 26 | 2  | 5.66   | 5.38   | 80.19  | 10.19  | 0.65   |
| 26 | 3  | 7.32   | 14.03  | 51.64  | 9.68   | 0.75   |
| 26 | 4  | 2.44   | 15.56  | 36.90  | 32.25  | 14.03  |
| 26 | 5  | 42.53  | 10.17  | 28.86  | 7.45   | 2.30   |
| 26 | 6  | 4.02   | 10.87  | 32.17  | 43.28  | 26.74  |
| 26 | 7  | 22.69  | 22.43  | 35.47  | 31.12  | 7.71   |
| 26 | 8  | 52.52  | 5.52   | 7.09   | 37.64  | 14.99  |
| 26 | 9  | 66.29  | 7.96   | 21.02  | 88.96  | 53.12  |
| 26 | 10 | 43.25  | 4.17   | 11.60  | 31.30  | 20.13  |
| 26 | 11 | 69.03  | 8.50   | 31.40  | 22.90  | 3.51   |
| 26 | 12 | 35.34  | 11.20  | 3.46   | 17.53  | 3.11   |
| 26 | 13 | 78.04  | 18.15  | 26.89  | 7.75   | 4.30   |
| 26 | 14 | 13.37  | 10.87  | 3.96   | 12.63  | 5.64   |
| 26 | 15 | 54.56  | 7.49   | 23.76  | 95.22  | 60.68  |
| 26 | 16 | 59.29  | 17.07  | 16.49  | 32.07  | 3.64   |
| 26 | 17 | 83.16  | 5.60   | 99.23  | 13.76  | 9.56   |

|    |    |        |        |        |        |        |
|----|----|--------|--------|--------|--------|--------|
| 26 | 18 | 36.58  | 0.92   | 45.40  | 63.24  | 41.95  |
| 26 | 19 | 171.74 | 5.58   | 4.29   | 444.17 | 302.97 |
| 26 | 20 | 258.20 | 4.04   | 21.43  | 182.74 | 35.59  |
| 26 | 21 | 201.02 | 6.50   | 45.03  | 56.91  | 28.42  |
| 26 | 22 | 45.10  | 11.64  | 5.14   | 30.51  | 14.04  |
| 26 | 23 | 349.30 | 14.19  | 39.05  | 355.59 | 175.66 |
| 26 | 24 | 255.27 | 6.72   | 9.71   | 278.45 | 107.43 |
| 26 | 25 | 26.99  | 12.07  | 80.71  | 176.67 | 94.06  |
| 26 | 26 | 311.37 | 3.36   | 3.66   | 80.23  | 34.43  |
| 26 | 27 | 201.03 | 7.74   | 13.94  | 253.90 | 108.82 |
| 26 | 28 | 192.76 | 14.85  | 59.02  | 10.23  | 5.37   |
| 26 | 29 | 44.93  | 1.60   | 140.45 | 82.65  | 21.03  |
| 26 | 30 | 255.10 | 10.28  | 118.84 | 95.50  | 55.46  |
| 27 | 0  | 134.14 | 61.33  | 84.42  | 108.85 | 172.82 |
| 27 | 1  | 4.83   | 10.32  | 27.01  | 7.09   | 7.81   |
| 27 | 2  | 11.25  | 9.12   | 104.03 | 1.47   | 13.63  |
| 27 | 3  | 11.57  | 16.62  | 80.74  | 11.87  | 20.02  |
| 27 | 4  | 1.43   | 10.43  | 34.84  | 42.08  | 17.96  |
| 27 | 5  | 38.84  | 13.21  | 18.81  | 5.97   | 12.51  |
| 27 | 6  | 3.01   | 27.75  | 22.58  | 14.10  | 31.57  |
| 27 | 7  | 85.22  | 28.51  | 10.72  | 40.30  | 8.53   |
| 27 | 8  | 40.50  | 68.54  | 8.05   | 27.93  | 21.72  |
| 27 | 9  | 28.38  | 25.24  | 18.24  | 53.37  | 37.42  |
| 27 | 10 | 15.06  | 15.72  | 4.77   | 11.98  | 26.25  |
| 27 | 11 | 56.85  | 44.56  | 46.29  | 39.53  | 87.12  |
| 27 | 12 | 16.82  | 64.66  | 2.74   | 13.98  | 23.22  |
| 27 | 13 | 77.32  | 57.63  | 37.12  | 7.48   | 66.06  |
| 27 | 14 | 11.63  | 119.62 | 5.67   | 10.25  | 107.51 |
| 27 | 15 | 34.83  | 43.78  | 34.33  | 152.17 | 122.84 |
| 27 | 16 | 27.67  | 14.97  | 22.97  | 42.64  | 55.88  |
| 27 | 17 | 27.69  | 119.93 | 140.05 | 13.15  | 11.80  |
| 27 | 18 | 14.96  | 13.82  | 65.70  | 60.93  | 89.34  |
| 27 | 19 | 276.27 | 314.44 | 3.33   | 348.18 | 171.60 |
| 27 | 20 | 106.69 | 41.49  | 27.76  | 253.99 | 345.08 |
| 27 | 21 | 64.63  | 120.12 | 72.36  | 78.31  | 70.11  |
| 27 | 22 | 24.12  | 155.74 | 7.89   | 50.22  | 23.65  |
| 27 | 23 | 243.27 | 320.40 | 66.70  | 392.48 | 349.14 |
| 27 | 24 | 403.39 | 400.49 | 12.84  | 287.99 | 253.58 |
| 27 | 25 | 35.86  | 260.98 | 117.71 | 214.59 | 267.31 |
| 27 | 26 | 212.21 | 60.76  | 2.96   | 96.63  | 191.29 |
| 27 | 27 | 250.33 | 121.04 | 18.00  | 354.46 | 384.18 |
| 27 | 28 | 235.01 | 356.03 | 77.61  | 36.87  | 81.18  |
| 27 | 29 | 97.49  | 36.47  | 193.26 | 91.35  | 237.16 |
| 27 | 30 | 294.85 | 140.10 | 157.34 | 140.95 | 131.92 |

|    |    |        |        |        |        |        |
|----|----|--------|--------|--------|--------|--------|
| 28 | 0  | 8.90   | 144.60 | 180.99 | 210.55 | 121.35 |
| 28 | 1  | 12.90  | 2.63   | 21.49  | 12.74  | 8.61   |
| 28 | 2  | 21.02  | 5.66   | 69.50  | 6.80   | 7.34   |
| 28 | 3  | 25.19  | 30.07  | 49.35  | 12.01  | 14.09  |
| 28 | 4  | 3.70   | 22.68  | 9.82   | 29.38  | 19.55  |
| 28 | 5  | 9.26   | 8.37   | 15.37  | 3.98   | 8.10   |
| 28 | 6  | 6.71   | 5.45   | 15.69  | 18.10  | 21.62  |
| 28 | 7  | 18.61  | 31.75  | 7.01   | 15.72  | 7.02   |
| 28 | 8  | 20.83  | 111.57 | 4.00   | 15.12  | 4.98   |
| 28 | 9  | 49.12  | 36.62  | 21.73  | 28.75  | 23.60  |
| 28 | 10 | 44.34  | 8.89   | 4.00   | 9.21   | 37.16  |
| 28 | 11 | 22.74  | 24.03  | 100.55 | 46.82  | 61.15  |
| 28 | 12 | 33.51  | 41.48  | 4.86   | 8.26   | 64.93  |
| 28 | 13 | 10.64  | 31.73  | 53.34  | 12.00  | 41.57  |
| 28 | 14 | 38.08  | 105.83 | 9.42   | 50.00  | 65.86  |
| 28 | 15 | 47.61  | 77.15  | 68.52  | 131.09 | 75.45  |
| 28 | 16 | 23.57  | 28.29  | 30.16  | 84.17  | 91.64  |
| 28 | 17 | 34.16  | 66.15  | 172.56 | 12.94  | 11.70  |
| 28 | 18 | 4.92   | 2.38   | 103.91 | 123.45 | 130.30 |
| 28 | 19 | 11.37  | 118.76 | 9.62   | 98.65  | 191.46 |
| 28 | 20 | 26.67  | 21.56  | 28.66  | 538.87 | 445.29 |
| 28 | 21 | 21.58  | 21.24  | 219.81 | 67.72  | 80.89  |
| 28 | 22 | 1.98   | 37.32  | 20.58  | 56.65  | 35.86  |
| 28 | 23 | 12.45  | 155.09 | 194.64 | 350.25 | 437.82 |
| 28 | 24 | 36.02  | 347.05 | 50.92  | 173.34 | 144.22 |
| 28 | 25 | 3.31   | 301.17 | 241.40 | 286.61 | 214.20 |
| 28 | 26 | 35.40  | 21.32  | 27.84  | 71.16  | 127.24 |
| 28 | 27 | 4.24   | 111.05 | 5.66   | 167.31 | 315.66 |
| 28 | 28 | 5.78   | 95.94  | 28.23  | 23.67  | 67.26  |
| 28 | 29 | 3.92   | 19.15  | 308.35 | 264.49 | 220.41 |
| 28 | 30 | 23.87  | 326.91 | 194.13 | 143.67 | 90.64  |
| 29 | 0  | 121.99 | 150.92 | 109.19 | 140.81 | 139.14 |
| 29 | 1  | 14.25  | 11.73  | 2.44   | 1.81   | 14.64  |
| 29 | 2  | 21.32  | 4.89   | 3.55   | 1.85   | 7.66   |
| 29 | 3  | 24.49  | 12.95  | 2.46   | 13.17  | 39.40  |
| 29 | 4  | 4.96   | 35.16  | 11.05  | 53.58  | 28.59  |
| 29 | 5  | 53.32  | 10.27  | 5.56   | 7.74   | 9.17   |
| 29 | 6  | 2.69   | 38.58  | 18.68  | 20.05  | 32.63  |
| 29 | 7  | 110.92 | 22.13  | 11.83  | 23.53  | 29.08  |
| 29 | 8  | 48.14  | 35.92  | 3.71   | 30.66  | 84.73  |
| 29 | 9  | 56.58  | 16.86  | 18.44  | 146.82 | 94.75  |
| 29 | 10 | 43.52  | 35.03  | 18.11  | 24.98  | 20.57  |
| 29 | 11 | 58.59  | 88.03  | 15.29  | 6.88   | 22.73  |
| 29 | 12 | 49.81  | 27.21  | 1.69   | 8.49   | 24.90  |



|    |    |        |        |        |        |        |
|----|----|--------|--------|--------|--------|--------|
| 29 | 13 | 74.36  | 54.63  | 50.90  | 3.99   | 8.59   |
| 29 | 14 | 24.53  | 92.58  | 4.43   | 30.80  | 15.83  |
| 29 | 15 | 58.21  | 54.38  | 30.54  | 23.59  | 13.74  |
| 29 | 16 | 60.65  | 34.29  | 7.20   | 129.18 | 113.42 |
| 29 | 17 | 79.53  | 88.39  | 45.41  | 11.65  | 25.20  |
| 29 | 18 | 16.10  | 11.72  | 43.59  | 55.02  | 61.55  |
| 29 | 19 | 115.93 | 149.96 | 6.59   | 225.75 | 188.56 |
| 29 | 20 | 54.46  | 64.61  | 35.59  | 92.18  | 62.09  |
| 29 | 21 | 28.25  | 118.79 | 262.92 | 22.90  | 11.51  |
| 29 | 22 | 11.58  | 192.88 | 28.07  | 12.48  | 3.69   |
| 29 | 23 | 108.70 | 175.76 | 348.60 | 131.89 | 100.88 |
| 29 | 24 | 239.32 | 231.95 | 87.02  | 154.56 | 156.55 |
| 29 | 25 | 21.13  | 308.12 | 393.24 | 115.06 | 101.35 |
| 29 | 26 | 243.01 | 35.17  | 96.41  | 3.29   | 73.02  |
| 29 | 27 | 89.60  | 128.47 | 61.80  | 32.46  | 83.31  |
| 29 | 28 | 83.67  | 190.39 | 287.24 | 17.32  | 71.93  |
| 29 | 29 | 17.30  | 27.65  | 191.99 | 327.23 | 343.33 |
| 29 | 30 | 203.80 | 299.99 | 316.29 | 130.01 | 122.76 |
| 30 | 0  | 32.85  | 71.27  | 5.05   | 30.55  | 7.39   |
| 30 | 1  | 1.82   | 16.73  | 0.68   | 7.49   | 3.55   |
| 30 | 2  | 4.50   | 10.98  | 0.51   | 2.22   | 1.79   |
| 30 | 3  | 5.38   | 34.69  | 0.40   | 26.22  | 7.36   |
| 30 | 4  | 0.85   | 55.35  | 3.14   | 71.68  | 17.91  |
| 30 | 5  | 3.87   | 12.85  | 5.09   | 7.38   | 2.14   |
| 30 | 6  | 1.46   | 30.44  | 6.76   | 27.81  | 4.38   |
| 30 | 7  | 34.99  | 23.01  | 2.84   | 14.54  | 6.92   |
| 30 | 8  | 9.92   | 45.76  | 0.95   | 16.94  | 6.18   |
| 30 | 9  | 11.27  | 16.73  | 4.95   | 16.40  | 3.55   |
| 30 | 10 | 16.45  | 10.64  | 8.10   | 16.55  | 7.85   |
| 30 | 11 | 17.78  | 31.79  | 0.32   | 5.90   | 3.25   |
| 30 | 12 | 7.41   | 37.52  | 0.30   | 7.06   | 3.36   |
| 30 | 13 | 22.89  | 28.41  | 0.51   | 8.48   | 3.47   |
| 30 | 14 | 7.96   | 28.00  | 0.77   | 10.71  | 2.84   |
| 30 | 15 | 20.83  | 36.73  | 0.59   | 58.04  | 23.50  |
| 30 | 16 | 15.77  | 16.98  | 0.53   | 20.14  | 2.05   |
| 30 | 17 | 18.57  | 52.93  | 2.94   | 2.24   | 0.52   |
| 30 | 18 | 4.25   | 3.06   | 1.72   | 18.68  | 8.42   |
| 30 | 19 | 18.84  | 86.52  | 0.24   | 33.21  | 2.18   |
| 30 | 20 | 26.12  | 20.93  | 0.91   | 74.59  | 49.57  |
| 30 | 21 | 16.36  | 65.98  | 2.20   | 9.97   | 5.51   |
| 30 | 22 | 3.29   | 89.19  | 0.80   | 12.12  | 7.71   |
| 30 | 23 | 32.53  | 82.98  | 1.87   | 60.97  | 18.18  |
| 30 | 24 | 78.78  | 161.43 | 0.48   | 59.37  | 36.08  |
| 30 | 25 | 5.78   | 133.40 | 0.77   | 64.54  | 43.04  |

|    |    |       |       |      |        |       |
|----|----|-------|-------|------|--------|-------|
| 30 | 26 | 75.14 | 13.08 | 0.54 | 6.40   | 1.29  |
| 30 | 27 | 23.65 | 17.66 | 0.45 | 25.80  | 2.96  |
| 30 | 28 | 21.92 | 31.13 | 1.50 | 3.49   | 1.67  |
| 30 | 29 | 5.01  | 3.55  | 0.91 | 104.04 | 56.85 |
| 30 | 30 | 62.46 | 96.82 | 1.43 | 32.09  | 20.77 |

**Table S25.** The original SOC matrix elements calculated for I-Gaq<sub>3</sub>.

| States         |                | SOC elements /cm <sup>-1</sup> |             |             |             |             |
|----------------|----------------|--------------------------------|-------------|-------------|-------------|-------------|
| T <sub>i</sub> | S <sub>j</sub> | Conformer 1                    | Conformer 2 | Conformer 3 | Conformer 4 | Conformer 5 |
| 1              | 0              | 21.15                          | 10.06       | 0.51        | 1.92        | 0.38        |
| 1              | 1              | 62.95                          | 49.58       | 2.38        | 6.01        | 3.44        |
| 1              | 2              | 15.37                          | 21.43       | 10.85       | 4.51        | 3.09        |
| 1              | 3              | 152.32                         | 84.70       | 1.62        | 3.93        | 0.45        |
| 1              | 4              | 163.51                         | 91.64       | 1.35        | 29.01       | 4.04        |
| 1              | 5              | 27.09                          | 9.35        | 4.42        | 8.68        | 3.07        |
| 1              | 6              | 12.00                          | 5.70        | 7.37        | 5.51        | 0.13        |
| 1              | 7              | 4.82                           | 2.30        | 1.47        | 7.00        | 0.36        |
| 1              | 8              | 7.58                           | 4.00        | 1.03        | 24.91       | 0.08        |
| 1              | 9              | 4.71                           | 2.57        | 4.57        | 5.24        | 0.82        |
| 1              | 10             | 0.57                           | 0.34        | 0.71        | 1.56        | 1.08        |
| 1              | 11             | 5.09                           | 2.07        | 0.93        | 1.84        | 0.62        |
| 1              | 12             | 3.63                           | 2.34        | 1.68        | 9.32        | 0.13        |
| 1              | 13             | 7.37                           | 4.16        | 1.49        | 4.06        | 0.73        |
| 1              | 14             | 6.61                           | 1.87        | 2.30        | 2.66        | 0.38        |
| 1              | 15             | 6.01                           | 0.80        | 2.05        | 2.11        | 0.43        |
| 1              | 16             | 9.25                           | 4.90        | 1.45        | 6.25        | 0.27        |
| 1              | 17             | 5.22                           | 2.79        | 0.29        | 1.11        | 0.39        |
| 1              | 18             | 7.99                           | 2.14        | 0.32        | 4.81        | 0.27        |
| 1              | 19             | 4.14                           | 1.69        | 0.41        | 0.43        | 0.23        |
| 1              | 20             | 9.09                           | 2.96        | 0.53        | 0.42        | 1.04        |
| 1              | 21             | 4.76                           | 3.24        | 1.00        | 0.74        | 0.51        |
| 1              | 22             | 10.06                          | 5.10        | 0.33        | 0.78        | 0.12        |
| 1              | 23             | 1.91                           | 0.68        | 0.15        | 0.85        | 0.09        |
| 1              | 24             | 11.62                          | 4.03        | 0.12        | 0.59        | 0.05        |
| 1              | 25             | 3.47                           | 1.02        | 0.12        | 1.37        | 0.14        |
| 1              | 26             | 1.53                           | 0.55        | 0.04        | 0.40        | 0.03        |
| 1              | 27             | 1.39                           | 1.15        | 0.03        | 1.10        | 0.10        |
| 1              | 28             | 2.22                           | 1.00        | 0.07        | 0.31        | 0.05        |
| 1              | 29             | 3.10                           | 0.47        | 1.06        | 1.02        | 0.43        |
| 1              | 30             | 23.95                          | 5.97        | 0.25        | 0.30        | 1.43        |
| 2              | 0              | 3.73                           | 2.81        | 1.21        | 0.40        | 0.42        |
| 2              | 1              | 2.87                           | 0.73        | 0.53        | 0.68        | 3.70        |

|   |    |       |       |       |       |       |
|---|----|-------|-------|-------|-------|-------|
| 2 | 2  | 26.31 | 21.45 | 8.20  | 0.60  | 7.17  |
| 2 | 3  | 3.67  | 7.14  | 8.75  | 0.60  | 0.57  |
| 2 | 4  | 1.36  | 3.04  | 3.05  | 3.15  | 1.11  |
| 2 | 5  | 17.40 | 27.51 | 1.26  | 0.96  | 4.55  |
| 2 | 6  | 24.23 | 21.46 | 1.69  | 0.57  | 1.57  |
| 2 | 7  | 13.01 | 11.68 | 1.62  | 0.86  | 2.51  |
| 2 | 8  | 13.35 | 9.28  | 2.93  | 2.72  | 1.80  |
| 2 | 9  | 13.99 | 8.86  | 12.19 | 0.20  | 9.06  |
| 2 | 10 | 2.26  | 1.14  | 2.14  | 0.32  | 4.39  |
| 2 | 11 | 1.00  | 1.86  | 2.15  | 0.21  | 0.74  |
| 2 | 12 | 0.76  | 0.99  | 9.59  | 0.80  | 0.55  |
| 2 | 13 | 0.54  | 0.83  | 17.40 | 0.39  | 4.02  |
| 2 | 14 | 0.85  | 0.25  | 5.07  | 0.35  | 3.41  |
| 2 | 15 | 0.09  | 0.55  | 4.88  | 0.19  | 2.45  |
| 2 | 16 | 1.48  | 1.10  | 3.64  | 0.58  | 1.03  |
| 2 | 17 | 0.69  | 0.45  | 4.17  | 1.11  | 0.61  |
| 2 | 18 | 1.52  | 0.74  | 4.01  | 0.67  | 0.76  |
| 2 | 19 | 0.34  | 0.26  | 4.45  | 0.54  | 0.75  |
| 2 | 20 | 1.11  | 0.48  | 4.78  | 0.83  | 0.40  |
| 2 | 21 | 1.27  | 0.68  | 8.04  | 1.27  | 0.46  |
| 2 | 22 | 0.78  | 0.67  | 3.72  | 0.39  | 0.49  |
| 2 | 23 | 1.59  | 0.73  | 2.09  | 0.54  | 0.31  |
| 2 | 24 | 0.86  | 1.23  | 2.47  | 0.32  | 0.24  |
| 2 | 25 | 1.65  | 0.85  | 0.95  | 0.59  | 0.55  |
| 2 | 26 | 1.04  | 0.31  | 0.84  | 0.23  | 0.09  |
| 2 | 27 | 1.72  | 0.30  | 0.65  | 0.76  | 0.14  |
| 2 | 28 | 0.66  | 0.85  | 1.82  | 0.10  | 0.07  |
| 2 | 29 | 1.39  | 0.57  | 0.71  | 1.31  | 0.04  |
| 2 | 30 | 0.42  | 0.93  | 1.03  | 0.13  | 0.11  |
| 3 | 0  | 4.07  | 0.56  | 1.59  | 2.31  | 1.34  |
| 3 | 1  | 11.31 | 5.00  | 1.25  | 14.43 | 1.40  |
| 3 | 2  | 11.71 | 10.60 | 6.34  | 5.71  | 2.75  |
| 3 | 3  | 53.26 | 15.39 | 13.16 | 2.41  | 8.20  |
| 3 | 4  | 49.90 | 11.64 | 0.78  | 20.16 | 1.17  |
| 3 | 5  | 37.32 | 17.27 | 2.59  | 2.90  | 2.77  |
| 3 | 6  | 42.70 | 17.31 | 3.11  | 1.53  | 2.95  |
| 3 | 7  | 23.11 | 9.23  | 0.95  | 4.91  | 0.46  |
| 3 | 8  | 17.64 | 10.50 | 0.47  | 17.72 | 3.23  |
| 3 | 9  | 12.62 | 8.20  | 4.77  | 13.61 | 8.78  |
| 3 | 10 | 1.25  | 0.78  | 1.74  | 3.80  | 2.29  |
| 3 | 11 | 4.19  | 1.66  | 2.52  | 8.12  | 3.34  |
| 3 | 12 | 1.96  | 0.70  | 11.93 | 18.56 | 3.83  |
| 3 | 13 | 0.85  | 0.41  | 24.00 | 6.04  | 15.40 |
| 3 | 14 | 0.86  | 1.14  | 7.44  | 3.29  | 15.45 |

|   |    |        |        |        |        |        |
|---|----|--------|--------|--------|--------|--------|
| 3 | 15 | 0.86   | 0.17   | 8.20   | 3.63   | 1.39   |
| 3 | 16 | 3.36   | 0.66   | 5.61   | 7.98   | 4.96   |
| 3 | 17 | 1.38   | 0.35   | 6.83   | 2.68   | 3.02   |
| 3 | 18 | 2.32   | 0.25   | 4.70   | 11.19  | 10.26  |
| 3 | 19 | 2.06   | 0.75   | 6.11   | 3.73   | 7.07   |
| 3 | 20 | 1.84   | 0.45   | 6.28   | 1.31   | 3.32   |
| 3 | 21 | 1.00   | 0.12   | 10.55  | 2.40   | 10.91  |
| 3 | 32 | 2.96   | 0.28   | 5.27   | 0.90   | 4.80   |
| 3 | 23 | 2.15   | 0.41   | 2.77   | 1.93   | 4.49   |
| 3 | 24 | 1.79   | 0.43   | 3.38   | 2.70   | 3.55   |
| 3 | 25 | 1.87   | 0.50   | 0.45   | 1.50   | 1.64   |
| 3 | 26 | 1.03   | 1.18   | 1.11   | 0.80   | 1.73   |
| 3 | 27 | 1.10   | 0.27   | 0.98   | 1.38   | 2.29   |
| 3 | 28 | 0.56   | 0.41   | 2.41   | 0.26   | 1.17   |
| 3 | 29 | 1.07   | 0.44   | 0.89   | 0.30   | 2.37   |
| 3 | 30 | 5.14   | 0.14   | 1.39   | 2.11   | 0.47   |
| 4 | 0  | 89.94  | 93.03  | 277.85 | 281.52 | 281.35 |
| 4 | 1  | 45.98  | 23.86  | 8.76   | 261.55 | 9.19   |
| 4 | 2  | 75.67  | 157.05 | 33.53  | 115.14 | 41.34  |
| 4 | 3  | 604.86 | 607.97 | 246.43 | 17.66  | 250.92 |
| 4 | 4  | 598.92 | 638.52 | 11.13  | 217.04 | 5.11   |
| 4 | 5  | 85.05  | 46.46  | 430.58 | 560.28 | 10.90  |
| 4 | 6  | 31.33  | 22.75  | 312.90 | 102.88 | 551.31 |
| 4 | 7  | 12.87  | 7.12   | 299.52 | 39.56  | 71.98  |
| 4 | 8  | 23.10  | 19.09  | 102.01 | 90.50  | 300.97 |
| 4 | 9  | 15.97  | 11.62  | 22.35  | 82.26  | 19.19  |
| 4 | 10 | 7.35   | 8.02   | 65.58  | 302.59 | 56.54  |
| 4 | 11 | 16.51  | 17.67  | 29.28  | 138.53 | 28.71  |
| 4 | 12 | 17.71  | 14.86  | 364.89 | 146.52 | 355.10 |
| 4 | 13 | 26.42  | 35.41  | 62.67  | 306.31 | 53.08  |
| 4 | 14 | 16.51  | 9.12   | 100.03 | 101.82 | 138.20 |
| 4 | 15 | 16.39  | 7.56   | 219.94 | 101.61 | 259.08 |
| 4 | 16 | 52.77  | 67.09  | 212.24 | 85.11  | 174.79 |
| 4 | 17 | 21.21  | 17.54  | 94.81  | 32.60  | 78.71  |
| 4 | 18 | 44.72  | 23.97  | 48.03  | 145.05 | 109.13 |
| 4 | 19 | 15.26  | 14.18  | 73.58  | 91.36  | 49.05  |
| 4 | 20 | 46.44  | 34.63  | 117.90 | 56.17  | 30.26  |
| 4 | 21 | 19.17  | 30.50  | 148.37 | 9.72   | 102.45 |
| 4 | 42 | 48.01  | 53.66  | 76.35  | 34.23  | 19.93  |
| 4 | 23 | 9.62   | 4.08   | 85.36  | 23.47  | 108.03 |
| 4 | 24 | 55.14  | 43.97  | 49.08  | 16.13  | 34.08  |
| 4 | 25 | 16.66  | 12.22  | 22.76  | 14.58  | 48.14  |
| 4 | 26 | 6.63   | 4.97   | 40.95  | 65.79  | 49.62  |
| 4 | 27 | 2.19   | 12.07  | 50.40  | 1.87   | 19.78  |

|   |    |        |        |        |        |        |
|---|----|--------|--------|--------|--------|--------|
| 4 | 28 | 13.52  | 0.26   | 57.09  | 52.01  | 53.31  |
| 4 | 29 | 13.39  | 2.13   | 26.74  | 8.69   | 117.24 |
| 4 | 30 | 78.17  | 49.85  | 116.18 | 35.36  | 35.32  |
| 5 | 0  | 85.54  | 77.69  | 229.33 | 234.17 | 232.19 |
| 5 | 1  | 35.57  | 27.41  | 13.16  | 80.12  | 10.76  |
| 5 | 2  | 25.19  | 20.92  | 21.77  | 36.65  | 19.97  |
| 5 | 3  | 65.30  | 49.55  | 95.84  | 9.32   | 83.93  |
| 5 | 4  | 85.00  | 45.29  | 21.42  | 48.45  | 15.83  |
| 5 | 5  | 616.93 | 637.29 | 42.83  | 54.70  | 21.91  |
| 5 | 6  | 607.11 | 630.27 | 35.43  | 310.00 | 107.08 |
| 5 | 7  | 233.92 | 119.72 | 34.32  | 18.67  | 100.33 |
| 5 | 8  | 59.06  | 49.09  | 312.01 | 34.38  | 288.54 |
| 5 | 9  | 34.57  | 43.65  | 76.79  | 45.72  | 51.50  |
| 5 | 10 | 10.78  | 8.85   | 19.93  | 189.63 | 42.37  |
| 5 | 11 | 32.39  | 34.09  | 13.97  | 110.07 | 41.30  |
| 5 | 12 | 11.34  | 8.84   | 244.01 | 86.28  | 414.55 |
| 5 | 13 | 14.14  | 20.34  | 77.48  | 162.74 | 158.64 |
| 5 | 14 | 9.17   | 3.47   | 228.47 | 222.58 | 131.64 |
| 5 | 15 | 11.11  | 6.24   | 191.46 | 432.68 | 304.53 |
| 5 | 16 | 6.36   | 15.15  | 428.37 | 319.48 | 195.20 |
| 5 | 17 | 12.32  | 8.73   | 217.04 | 49.75  | 77.36  |
| 5 | 18 | 8.67   | 7.82   | 16.26  | 230.29 | 22.76  |
| 5 | 19 | 12.25  | 4.56   | 371.06 | 258.80 | 390.95 |
| 5 | 20 | 34.10  | 32.70  | 195.10 | 145.92 | 70.93  |
| 5 | 21 | 4.16   | 3.55   | 47.78  | 31.35  | 230.20 |
| 5 | 22 | 11.30  | 12.72  | 41.51  | 80.98  | 76.64  |
| 5 | 23 | 39.50  | 37.32  | 125.92 | 19.11  | 104.63 |
| 5 | 24 | 58.23  | 56.75  | 46.00  | 20.82  | 67.91  |
| 5 | 25 | 55.35  | 49.23  | 18.57  | 12.31  | 31.11  |
| 5 | 26 | 10.00  | 3.64   | 36.99  | 45.83  | 29.76  |
| 5 | 27 | 19.04  | 15.37  | 53.43  | 2.99   | 11.95  |
| 5 | 28 | 11.09  | 15.94  | 39.48  | 52.63  | 69.63  |
| 5 | 29 | 41.04  | 36.24  | 23.86  | 2.06   | 102.08 |
| 5 | 30 | 7.69   | 40.11  | 95.05  | 32.65  | 28.74  |
| 6 | 0  | 75.84  | 47.06  | 181.00 | 182.11 | 183.57 |
| 6 | 1  | 637.78 | 638.83 | 11.89  | 630.35 | 15.45  |
| 6 | 2  | 32.29  | 21.05  | 77.61  | 125.50 | 86.70  |
| 6 | 3  | 40.53  | 36.31  | 618.37 | 28.52  | 627.31 |
| 6 | 4  | 538.96 | 519.04 | 29.74  | 206.18 | 15.83  |
| 6 | 5  | 72.56  | 41.62  | 386.21 | 484.65 | 13.23  |
| 6 | 6  | 41.99  | 34.43  | 279.67 | 134.00 | 521.69 |
| 6 | 7  | 9.52   | 10.54  | 270.82 | 27.57  | 91.90  |
| 6 | 8  | 15.65  | 14.75  | 121.00 | 47.05  | 241.75 |
| 6 | 9  | 7.05   | 7.50   | 61.01  | 72.25  | 35.44  |

|   |    |        |        |        |        |        |
|---|----|--------|--------|--------|--------|--------|
| 6 | 10 | 14.98  | 16.37  | 56.66  | 171.58 | 47.63  |
| 6 | 11 | 18.74  | 14.90  | 15.72  | 105.73 | 8.30   |
| 6 | 12 | 69.26  | 66.91  | 174.53 | 9.58   | 151.41 |
| 6 | 13 | 23.78  | 29.02  | 103.81 | 113.56 | 13.81  |
| 6 | 14 | 28.10  | 9.85   | 110.94 | 87.18  | 96.39  |
| 6 | 15 | 13.50  | 8.93   | 115.51 | 95.86  | 147.10 |
| 6 | 16 | 32.37  | 41.68  | 140.49 | 96.30  | 126.49 |
| 6 | 17 | 18.41  | 16.27  | 71.54  | 24.33  | 67.90  |
| 6 | 18 | 27.08  | 23.36  | 20.69  | 104.34 | 69.54  |
| 6 | 19 | 15.93  | 9.35   | 79.59  | 77.16  | 103.40 |
| 6 | 20 | 23.71  | 12.48  | 100.74 | 52.90  | 25.09  |
| 6 | 21 | 15.35  | 18.06  | 98.28  | 12.25  | 72.05  |
| 6 | 22 | 20.52  | 21.51  | 31.57  | 33.13  | 16.78  |
| 6 | 23 | 6.23   | 3.38   | 84.59  | 8.82   | 89.35  |
| 6 | 24 | 20.22  | 16.05  | 29.52  | 16.54  | 40.97  |
| 6 | 25 | 13.23  | 9.41   | 10.34  | 25.83  | 24.17  |
| 6 | 26 | 6.39   | 4.19   | 58.16  | 61.50  | 52.65  |
| 6 | 27 | 3.26   | 9.85   | 80.26  | 2.13   | 44.37  |
| 6 | 28 | 10.57  | 1.59   | 46.16  | 71.03  | 72.48  |
| 6 | 29 | 20.88  | 2.38   | 22.27  | 4.23   | 93.52  |
| 6 | 30 | 153.31 | 39.79  | 91.54  | 23.30  | 25.75  |
| 7 | 0  | 40.74  | 41.64  | 25.86  | 185.54 | 34.97  |
| 7 | 1  | 643.88 | 658.08 | 5.29   | 101.05 | 21.01  |
| 7 | 2  | 63.91  | 130.18 | 446.28 | 37.05  | 444.21 |
| 7 | 3  | 522.73 | 494.12 | 29.73  | 33.15  | 38.71  |
| 7 | 4  | 14.77  | 25.57  | 48.91  | 371.54 | 177.75 |
| 7 | 5  | 25.30  | 20.27  | 140.68 | 159.08 | 368.07 |
| 7 | 6  | 37.71  | 7.11   | 272.83 | 70.61  | 25.44  |
| 7 | 7  | 11.91  | 5.68   | 70.03  | 92.86  | 28.83  |
| 7 | 8  | 5.94   | 8.14   | 15.38  | 264.64 | 27.50  |
| 7 | 9  | 5.50   | 9.59   | 20.55  | 104.52 | 37.00  |
| 7 | 10 | 5.59   | 5.74   | 11.14  | 227.77 | 12.48  |
| 7 | 11 | 8.70   | 13.75  | 8.37   | 133.31 | 15.95  |
| 7 | 12 | 35.94  | 33.68  | 20.52  | 90.10  | 23.91  |
| 7 | 13 | 13.22  | 20.82  | 30.34  | 236.57 | 27.72  |
| 7 | 14 | 18.26  | 12.13  | 22.06  | 85.74  | 26.88  |
| 7 | 15 | 12.69  | 6.74   | 18.44  | 115.63 | 27.49  |
| 7 | 16 | 7.92   | 10.00  | 18.16  | 176.92 | 7.10   |
| 7 | 17 | 3.94   | 1.61   | 25.61  | 23.01  | 10.43  |
| 7 | 18 | 10.11  | 15.80  | 16.18  | 77.39  | 47.35  |
| 7 | 19 | 6.20   | 3.63   | 26.08  | 169.80 | 17.66  |
| 7 | 20 | 21.59  | 16.31  | 1.62   | 119.57 | 5.35   |
| 7 | 21 | 6.02   | 12.66  | 7.91   | 86.43  | 23.62  |
| 7 | 22 | 11.02  | 11.11  | 6.69   | 282.79 | 9.78   |

|   |    |        |        |        |        |        |
|---|----|--------|--------|--------|--------|--------|
| 7 | 23 | 0.82   | 1.10   | 21.04  | 59.23  | 29.07  |
| 7 | 24 | 24.45  | 27.31  | 34.68  | 36.50  | 44.65  |
| 7 | 25 | 14.43  | 3.91   | 4.48   | 3.01   | 20.44  |
| 7 | 26 | 1.67   | 2.17   | 6.69   | 16.21  | 6.32   |
| 7 | 27 | 2.71   | 12.11  | 10.43  | 15.32  | 4.63   |
| 7 | 28 | 13.11  | 0.76   | 2.11   | 37.58  | 11.49  |
| 7 | 29 | 14.38  | 3.54   | 3.79   | 5.48   | 30.83  |
| 7 | 30 | 133.17 | 44.73  | 22.69  | 11.40  | 10.94  |
| 8 | 0  | 89.72  | 79.32  | 39.90  | 129.49 | 26.85  |
| 8 | 1  | 43.56  | 21.97  | 418.72 | 581.64 | 410.27 |
| 8 | 2  | 592.13 | 594.09 | 10.43  | 87.93  | 31.27  |
| 8 | 3  | 74.90  | 154.21 | 28.10  | 8.57   | 24.09  |
| 8 | 4  | 11.43  | 14.80  | 486.21 | 325.02 | 468.92 |
| 8 | 5  | 30.93  | 27.72  | 300.73 | 50.92  | 612.13 |
| 8 | 6  | 460.48 | 463.11 | 544.00 | 48.95  | 37.64  |
| 8 | 7  | 163.08 | 123.58 | 168.01 | 102.45 | 62.68  |
| 8 | 8  | 158.29 | 137.70 | 39.63  | 347.85 | 47.17  |
| 8 | 9  | 185.42 | 159.45 | 30.57  | 68.39  | 38.00  |
| 8 | 10 | 17.07  | 14.27  | 29.31  | 227.54 | 28.04  |
| 8 | 11 | 14.54  | 21.01  | 52.19  | 95.71  | 32.73  |
| 8 | 12 | 21.14  | 24.56  | 22.31  | 39.38  | 20.37  |
| 8 | 13 | 8.06   | 14.17  | 19.50  | 186.79 | 18.89  |
| 8 | 14 | 29.89  | 2.93   | 21.19  | 86.60  | 12.68  |
| 8 | 15 | 29.70  | 38.09  | 22.93  | 76.78  | 18.13  |
| 8 | 16 | 21.72  | 27.55  | 17.48  | 35.68  | 11.64  |
| 8 | 17 | 9.48   | 6.68   | 20.89  | 14.32  | 8.64   |
| 8 | 18 | 106.78 | 94.11  | 9.87   | 70.47  | 26.07  |
| 8 | 19 | 9.76   | 10.01  | 19.20  | 74.38  | 11.10  |
| 8 | 20 | 57.26  | 53.87  | 3.55   | 45.26  | 3.15   |
| 8 | 21 | 7.28   | 26.54  | 15.06  | 28.78  | 17.24  |
| 8 | 22 | 52.47  | 44.27  | 8.97   | 99.16  | 14.85  |
| 8 | 23 | 12.72  | 10.79  | 45.52  | 29.80  | 32.92  |
| 8 | 24 | 69.66  | 61.88  | 39.64  | 10.83  | 32.90  |
| 8 | 25 | 49.91  | 48.83  | 4.90   | 12.97  | 14.40  |
| 8 | 26 | 10.49  | 3.17   | 3.71   | 49.60  | 3.30   |
| 8 | 27 | 11.75  | 12.43  | 10.69  | 6.91   | 3.75   |
| 8 | 28 | 13.66  | 6.99   | 2.20   | 37.72  | 7.74   |
| 8 | 29 | 45.67  | 34.84  | 7.97   | 2.33   | 32.31  |
| 8 | 30 | 15.25  | 33.67  | 38.35  | 15.67  | 10.63  |
| 9 | 0  | 38.47  | 84.35  | 102.80 | 23.94  | 65.32  |
| 9 | 1  | 25.47  | 26.31  | 77.02  | 74.82  | 157.48 |
| 9 | 2  | 291.91 | 590.38 | 325.44 | 3.17   | 393.97 |
| 9 | 3  | 59.11  | 156.09 | 258.15 | 0.51   | 54.76  |
| 9 | 4  | 40.14  | 26.33  | 51.68  | 16.27  | 45.44  |

|    |    |        |        |        |        |        |
|----|----|--------|--------|--------|--------|--------|
| 9  | 5  | 230.36 | 473.98 | 115.65 | 14.52  | 274.80 |
| 9  | 6  | 80.61  | 38.69  | 160.04 | 12.02  | 38.16  |
| 9  | 7  | 77.64  | 66.88  | 79.55  | 6.26   | 63.49  |
| 9  | 8  | 518.00 | 46.88  | 99.41  | 22.27  | 67.36  |
| 9  | 9  | 490.07 | 44.18  | 62.60  | 10.81  | 89.41  |
| 9  | 10 | 104.96 | 79.98  | 8.47   | 26.60  | 38.62  |
| 9  | 11 | 21.95  | 27.81  | 13.14  | 8.08   | 15.46  |
| 9  | 12 | 71.42  | 66.72  | 198.15 | 13.30  | 104.07 |
| 9  | 13 | 9.89   | 12.94  | 147.30 | 25.39  | 88.73  |
| 9  | 14 | 107.51 | 8.22   | 122.36 | 11.13  | 68.19  |
| 9  | 15 | 120.60 | 142.98 | 140.26 | 11.76  | 77.56  |
| 9  | 16 | 177.23 | 69.82  | 98.30  | 19.01  | 18.63  |
| 9  | 17 | 11.63  | 11.81  | 111.14 | 1.65   | 23.62  |
| 9  | 18 | 112.44 | 36.72  | 90.03  | 2.29   | 122.93 |
| 9  | 19 | 37.24  | 8.58   | 138.30 | 14.79  | 64.53  |
| 9  | 20 | 121.76 | 89.03  | 25.59  | 11.06  | 18.02  |
| 9  | 21 | 24.78  | 52.38  | 37.70  | 2.47   | 63.53  |
| 9  | 22 | 80.15  | 63.23  | 35.13  | 6.73   | 20.34  |
| 9  | 23 | 21.01  | 32.38  | 101.59 | 2.25   | 65.99  |
| 9  | 24 | 57.86  | 24.97  | 179.45 | 2.36   | 111.53 |
| 9  | 25 | 48.15  | 28.91  | 23.93  | 2.24   | 51.96  |
| 9  | 26 | 13.71  | 3.91   | 29.92  | 6.86   | 18.92  |
| 9  | 27 | 37.74  | 11.58  | 56.20  | 0.84   | 13.21  |
| 9  | 28 | 23.84  | 12.16  | 11.94  | 5.00   | 32.08  |
| 9  | 29 | 23.90  | 18.20  | 13.55  | 0.79   | 64.89  |
| 9  | 30 | 4.74   | 31.31  | 96.33  | 3.59   | 24.42  |
| 10 | 0  | 98.66  | 193.05 | 97.81  | 95.22  | 110.65 |
| 10 | 1  | 30.23  | 9.29   | 34.10  | 44.11  | 19.46  |
| 10 | 2  | 572.47 | 187.38 | 315.86 | 578.26 | 196.04 |
| 10 | 3  | 58.54  | 30.27  | 420.80 | 105.14 | 396.89 |
| 10 | 4  | 46.79  | 19.62  | 15.04  | 70.41  | 46.12  |
| 10 | 5  | 424.86 | 110.62 | 95.56  | 119.81 | 176.60 |
| 10 | 6  | 100.61 | 81.73  | 245.37 | 72.23  | 121.41 |
| 10 | 7  | 75.57  | 12.09  | 50.42  | 213.20 | 95.58  |
| 10 | 8  | 278.70 | 236.83 | 68.23  | 532.69 | 168.40 |
| 10 | 9  | 272.34 | 211.54 | 68.90  | 154.70 | 58.90  |
| 10 | 10 | 29.95  | 277.86 | 6.78   | 69.94  | 56.18  |
| 10 | 11 | 29.81  | 18.58  | 13.20  | 101.79 | 20.25  |
| 10 | 12 | 26.67  | 134.40 | 270.45 | 140.56 | 309.81 |
| 10 | 13 | 11.84  | 22.41  | 110.89 | 35.31  | 151.17 |
| 10 | 14 | 29.66  | 39.47  | 100.91 | 65.08  | 104.54 |
| 10 | 15 | 43.59  | 494.61 | 112.55 | 74.54  | 164.50 |
| 10 | 16 | 43.38  | 262.23 | 89.31  | 52.02  | 50.44  |
| 10 | 17 | 14.19  | 38.34  | 91.36  | 15.20  | 36.85  |



|    |    |        |        |        |        |        |
|----|----|--------|--------|--------|--------|--------|
| 10 | 18 | 47.88  | 84.48  | 69.68  | 34.18  | 220.03 |
| 10 | 19 | 11.82  | 40.81  | 112.35 | 70.61  | 151.13 |
| 10 | 20 | 63.20  | 313.78 | 27.59  | 68.31  | 41.14  |
| 10 | 21 | 20.41  | 172.63 | 27.68  | 24.34  | 121.42 |
| 10 | 22 | 65.41  | 187.00 | 26.91  | 101.16 | 42.59  |
| 10 | 23 | 39.81  | 8.39   | 93.44  | 16.06  | 143.39 |
| 10 | 24 | 30.25  | 93.67  | 156.88 | 15.37  | 208.95 |
| 10 | 25 | 41.06  | 19.82  | 24.60  | 7.51   | 107.08 |
| 10 | 26 | 7.88   | 6.07   | 28.41  | 15.28  | 44.31  |
| 10 | 27 | 19.80  | 27.78  | 55.84  | 4.05   | 24.71  |
| 10 | 28 | 9.71   | 13.25  | 16.83  | 26.55  | 75.29  |
| 10 | 29 | 26.24  | 39.59  | 9.63   | 1.96   | 116.18 |
| 10 | 30 | 5.55   | 97.31  | 73.06  | 16.86  | 44.87  |
| 11 | 0  | 243.08 | 180.74 | 271.82 | 284.16 | 253.39 |
| 11 | 1  | 5.80   | 18.71  | 26.06  | 140.00 | 11.97  |
| 11 | 2  | 139.62 | 133.21 | 106.37 | 60.94  | 117.56 |
| 11 | 3  | 26.51  | 55.97  | 343.42 | 8.24   | 563.07 |
| 11 | 4  | 8.31   | 42.29  | 27.86  | 43.83  | 22.33  |
| 11 | 5  | 101.82 | 69.33  | 27.17  | 38.15  | 32.70  |
| 11 | 6  | 29.31  | 74.30  | 27.97  | 648.01 | 68.76  |
| 11 | 7  | 36.48  | 64.92  | 62.12  | 39.67  | 155.25 |
| 11 | 8  | 133.93 | 497.51 | 590.33 | 103.00 | 404.53 |
| 11 | 9  | 139.59 | 488.10 | 64.44  | 60.34  | 16.83  |
| 11 | 10 | 312.67 | 132.28 | 10.62  | 123.00 | 38.18  |
| 11 | 11 | 11.61  | 25.48  | 4.68   | 70.07  | 14.28  |
| 11 | 12 | 103.74 | 88.94  | 83.93  | 78.02  | 80.38  |
| 11 | 13 | 35.75  | 13.56  | 66.72  | 83.71  | 194.67 |
| 11 | 14 | 349.92 | 7.64   | 242.98 | 192.48 | 191.16 |
| 11 | 15 | 410.77 | 227.59 | 107.08 | 415.57 | 287.30 |
| 11 | 16 | 211.11 | 191.56 | 371.10 | 294.61 | 228.82 |
| 11 | 17 | 15.60  | 29.31  | 87.81  | 46.18  | 97.78  |
| 11 | 18 | 145.37 | 59.46  | 34.20  | 190.86 | 89.65  |
| 11 | 19 | 35.19  | 42.16  | 234.71 | 133.72 | 189.78 |
| 11 | 20 | 365.19 | 184.61 | 168.69 | 79.03  | 33.55  |
| 11 | 21 | 112.60 | 116.12 | 109.29 | 34.40  | 71.25  |
| 11 | 22 | 220.90 | 267.67 | 57.24  | 116.76 | 24.09  |
| 11 | 23 | 45.40  | 17.34  | 116.59 | 32.57  | 151.39 |
| 11 | 24 | 69.20  | 113.91 | 57.91  | 23.29  | 69.71  |
| 11 | 25 | 62.94  | 66.47  | 27.75  | 14.62  | 61.70  |
| 11 | 26 | 8.33   | 8.64   | 52.11  | 50.84  | 36.81  |
| 11 | 27 | 12.78  | 22.81  | 48.56  | 3.40   | 18.73  |
| 11 | 28 | 13.30  | 32.61  | 27.76  | 34.19  | 63.65  |
| 11 | 29 | 53.55  | 44.88  | 33.27  | 0.72   | 175.57 |
| 11 | 30 | 15.75  | 112.77 | 149.09 | 23.80  | 52.81  |

|    |    |        |        |        |        |        |
|----|----|--------|--------|--------|--------|--------|
| 12 | 0  | 238.71 | 234.12 | 237.86 | 204.92 | 296.48 |
| 12 | 1  | 21.85  | 25.67  | 100.93 | 387.46 | 20.68  |
| 12 | 2  | 48.43  | 68.99  | 242.09 | 64.42  | 99.41  |
| 12 | 3  | 90.57  | 78.33  | 359.76 | 37.09  | 270.85 |
| 12 | 4  | 65.40  | 52.70  | 110.25 | 304.28 | 31.53  |
| 12 | 5  | 57.12  | 48.08  | 77.93  | 225.65 | 48.67  |
| 12 | 6  | 62.15  | 66.14  | 63.35  | 56.07  | 232.82 |
| 12 | 7  | 87.49  | 80.35  | 76.92  | 78.88  | 159.51 |
| 12 | 8  | 176.84 | 299.86 | 282.53 | 181.01 | 395.46 |
| 12 | 9  | 221.15 | 330.90 | 228.23 | 169.59 | 189.22 |
| 12 | 10 | 131.55 | 118.03 | 13.67  | 229.78 | 28.40  |
| 12 | 11 | 18.47  | 22.72  | 11.38  | 121.77 | 50.64  |
| 12 | 12 | 234.98 | 223.99 | 265.48 | 134.88 | 402.27 |
| 12 | 13 | 16.76  | 46.34  | 179.16 | 267.53 | 86.54  |
| 12 | 14 | 41.26  | 18.53  | 70.63  | 26.16  | 212.73 |
| 12 | 15 | 13.17  | 67.03  | 106.82 | 34.90  | 132.78 |
| 12 | 16 | 376.18 | 460.37 | 185.43 | 163.90 | 127.93 |
| 12 | 17 | 35.61  | 46.33  | 243.63 | 19.81  | 54.05  |
| 12 | 18 | 317.56 | 138.24 | 122.10 | 89.75  | 251.94 |
| 12 | 19 | 68.19  | 65.05  | 163.30 | 221.96 | 114.03 |
| 12 | 20 | 320.83 | 236.30 | 36.46  | 152.27 | 45.78  |
| 12 | 21 | 49.01  | 105.60 | 99.72  | 73.12  | 198.57 |
| 12 | 22 | 294.36 | 286.17 | 58.84  | 223.65 | 69.13  |
| 12 | 23 | 46.77  | 18.40  | 201.91 | 47.57  | 163.91 |
| 12 | 24 | 290.26 | 230.66 | 205.65 | 37.45  | 227.06 |
| 12 | 25 | 105.78 | 78.53  | 19.58  | 12.84  | 95.33  |
| 12 | 26 | 5.82   | 2.40   | 18.87  | 55.98  | 34.72  |
| 12 | 27 | 20.29  | 50.39  | 21.00  | 17.09  | 14.27  |
| 12 | 28 | 42.48  | 21.35  | 6.22   | 27.37  | 33.49  |
| 12 | 29 | 36.33  | 40.93  | 37.06  | 5.80   | 172.11 |
| 12 | 30 | 22.91  | 128.11 | 197.25 | 27.06  | 59.78  |
| 13 | 0  | 95.24  | 107.72 | 87.08  | 106.02 | 21.28  |
| 13 | 1  | 10.16  | 15.40  | 271.84 | 48.38  | 327.83 |
| 13 | 2  | 195.10 | 165.60 | 592.20 | 324.77 | 628.07 |
| 13 | 3  | 15.31  | 38.49  | 177.41 | 74.18  | 92.74  |
| 13 | 4  | 17.85  | 9.83   | 315.58 | 402.44 | 334.95 |
| 13 | 5  | 165.57 | 124.77 | 62.84  | 136.64 | 9.27   |
| 13 | 6  | 169.94 | 123.10 | 15.99  | 84.19  | 16.10  |
| 13 | 7  | 540.90 | 555.26 | 41.36  | 74.01  | 37.94  |
| 13 | 8  | 97.82  | 101.93 | 52.80  | 133.74 | 10.91  |
| 13 | 9  | 435.53 | 410.21 | 18.84  | 197.99 | 20.11  |
| 13 | 10 | 51.12  | 54.44  | 18.99  | 164.46 | 25.34  |
| 13 | 11 | 21.76  | 19.80  | 35.07  | 83.94  | 19.44  |
| 13 | 12 | 24.15  | 20.53  | 76.67  | 76.40  | 16.35  |

|    |    |        |        |        |        |        |
|----|----|--------|--------|--------|--------|--------|
| 13 | 13 | 2.67   | 9.19   | 84.81  | 183.53 | 21.92  |
| 13 | 14 | 32.10  | 7.55   | 55.14  | 50.68  | 33.66  |
| 13 | 15 | 37.61  | 54.05  | 50.47  | 72.67  | 10.77  |
| 13 | 16 | 13.89  | 74.26  | 31.52  | 242.08 | 11.13  |
| 13 | 17 | 34.57  | 10.76  | 99.42  | 9.74   | 11.33  |
| 13 | 18 | 177.77 | 191.84 | 67.03  | 51.18  | 31.16  |
| 13 | 19 | 21.86  | 23.71  | 77.05  | 166.53 | 11.57  |
| 13 | 20 | 81.05  | 91.55  | 21.37  | 127.70 | 1.58   |
| 13 | 21 | 10.97  | 53.11  | 70.29  | 48.73  | 14.60  |
| 13 | 22 | 134.81 | 132.33 | 35.47  | 169.60 | 12.06  |
| 13 | 23 | 31.15  | 11.04  | 115.63 | 25.69  | 22.85  |
| 13 | 24 | 85.53  | 113.10 | 100.11 | 15.65  | 30.81  |
| 13 | 25 | 95.08  | 112.92 | 10.11  | 8.24   | 8.39   |
| 13 | 26 | 15.49  | 6.05   | 6.24   | 19.54  | 3.47   |
| 13 | 27 | 11.96  | 22.34  | 7.43   | 10.61  | 2.73   |
| 13 | 28 | 21.71  | 6.23   | 7.68   | 26.42  | 2.74   |
| 13 | 29 | 50.29  | 54.22  | 18.48  | 3.61   | 15.86  |
| 13 | 30 | 5.36   | 56.20  | 102.25 | 23.08  | 5.45   |
| 14 | 0  | 72.65  | 83.95  | 92.48  | 37.98  | 29.74  |
| 14 | 1  | 12.02  | 13.31  | 51.72  | 38.62  | 10.14  |
| 14 | 2  | 32.47  | 26.09  | 124.93 | 216.59 | 48.37  |
| 14 | 3  | 16.58  | 13.89  | 190.07 | 48.36  | 42.40  |
| 14 | 4  | 7.32   | 12.20  | 60.69  | 289.90 | 19.05  |
| 14 | 5  | 155.33 | 103.03 | 38.11  | 92.69  | 37.59  |
| 14 | 6  | 153.92 | 48.10  | 51.61  | 78.08  | 23.91  |
| 14 | 7  | 593.07 | 620.30 | 7.68   | 87.55  | 2.84   |
| 14 | 8  | 488.77 | 469.27 | 98.77  | 89.09  | 32.59  |
| 14 | 9  | 108.62 | 106.16 | 356.66 | 107.44 | 188.75 |
| 14 | 10 | 11.49  | 30.20  | 42.20  | 75.35  | 54.38  |
| 14 | 11 | 14.70  | 12.87  | 10.38  | 59.26  | 10.80  |
| 14 | 12 | 81.96  | 120.61 | 39.68  | 119.25 | 9.55   |
| 14 | 13 | 8.07   | 18.96  | 108.65 | 62.97  | 87.29  |
| 14 | 14 | 24.19  | 1.75   | 132.19 | 37.31  | 85.84  |
| 14 | 15 | 26.47  | 25.76  | 168.28 | 23.41  | 81.01  |
| 14 | 16 | 71.86  | 125.47 | 116.77 | 82.00  | 8.70   |
| 14 | 17 | 15.30  | 16.01  | 73.32  | 19.63  | 6.07   |
| 14 | 18 | 44.55  | 44.20  | 55.86  | 84.23  | 42.66  |
| 14 | 19 | 14.93  | 9.33   | 80.08  | 82.61  | 27.27  |
| 14 | 20 | 76.34  | 67.59  | 29.23  | 62.90  | 12.17  |
| 14 | 21 | 32.16  | 55.75  | 68.05  | 16.11  | 31.65  |
| 14 | 22 | 57.85  | 73.57  | 38.68  | 35.79  | 15.51  |
| 14 | 23 | 7.10   | 2.19   | 105.22 | 8.06   | 37.54  |
| 14 | 24 | 52.72  | 67.69  | 88.49  | 8.72   | 44.23  |
| 14 | 25 | 44.16  | 46.73  | 13.70  | 11.50  | 17.53  |

|    |    |        |        |        |        |        |
|----|----|--------|--------|--------|--------|--------|
| 14 | 26 | 19.58  | 8.26   | 3.99   | 12.89  | 1.98   |
| 14 | 27 | 36.15  | 16.67  | 8.26   | 6.21   | 6.08   |
| 14 | 28 | 7.45   | 32.83  | 9.07   | 15.51  | 7.68   |
| 14 | 29 | 30.69  | 32.75  | 21.30  | 1.28   | 37.80  |
| 14 | 30 | 2.86   | 36.62  | 110.86 | 17.55  | 13.13  |
| 15 | 0  | 210.31 | 206.05 | 33.04  | 210.99 | 83.41  |
| 15 | 1  | 8.45   | 12.45  | 10.71  | 92.21  | 14.69  |
| 15 | 2  | 9.79   | 8.60   | 30.49  | 284.27 | 27.92  |
| 15 | 3  | 6.31   | 8.24   | 23.75  | 57.83  | 29.13  |
| 15 | 4  | 3.43   | 7.47   | 90.25  | 281.37 | 49.76  |
| 15 | 5  | 12.52  | 9.35   | 243.58 | 69.56  | 18.51  |
| 15 | 6  | 30.60  | 11.59  | 58.71  | 93.11  | 101.44 |
| 15 | 7  | 96.66  | 115.05 | 303.00 | 65.53  | 169.24 |
| 15 | 8  | 44.06  | 51.86  | 13.87  | 73.71  | 61.96  |
| 15 | 9  | 57.61  | 81.33  | 8.73   | 96.17  | 95.30  |
| 15 | 10 | 646.74 | 618.01 | 519.90 | 255.84 | 598.42 |
| 15 | 11 | 26.62  | 21.73  | 39.82  | 172.07 | 20.59  |
| 15 | 12 | 186.93 | 246.45 | 296.16 | 112.07 | 50.40  |
| 15 | 13 | 34.90  | 23.03  | 203.42 | 308.21 | 395.39 |
| 15 | 14 | 348.50 | 38.36  | 367.40 | 90.65  | 371.32 |
| 15 | 15 | 404.66 | 533.04 | 321.82 | 121.90 | 304.55 |
| 15 | 16 | 156.67 | 141.88 | 206.72 | 235.00 | 53.75  |
| 15 | 17 | 10.78  | 21.30  | 19.78  | 30.01  | 54.92  |
| 15 | 18 | 88.96  | 35.49  | 18.99  | 117.38 | 88.08  |
| 15 | 19 | 18.27  | 19.77  | 16.70  | 313.84 | 32.59  |
| 15 | 20 | 236.99 | 220.15 | 33.46  | 200.14 | 22.35  |
| 15 | 21 | 69.67  | 128.23 | 53.29  | 113.28 | 86.06  |
| 15 | 22 | 88.62  | 120.05 | 41.06  | 318.02 | 64.47  |
| 15 | 23 | 15.44  | 7.12   | 14.12  | 56.27  | 72.35  |
| 15 | 24 | 60.11  | 49.42  | 10.38  | 49.26  | 86.58  |
| 15 | 25 | 44.16  | 43.06  | 8.90   | 21.59  | 37.30  |
| 15 | 26 | 8.93   | 6.37   | 4.58   | 34.38  | 16.86  |
| 15 | 27 | 5.19   | 62.41  | 10.57  | 7.35   | 19.50  |
| 15 | 28 | 64.27  | 10.42  | 12.14  | 43.66  | 20.26  |
| 15 | 29 | 59.28  | 55.58  | 6.32   | 15.58  | 48.09  |
| 15 | 30 | 15.50  | 87.69  | 24.31  | 24.51  | 16.33  |
| 16 | 0  | 279.35 | 261.66 | 38.31  | 246.14 | 227.85 |
| 16 | 1  | 8.39   | 7.91   | 10.34  | 73.27  | 5.15   |
| 16 | 2  | 65.64  | 42.23  | 23.61  | 36.99  | 13.54  |
| 16 | 3  | 14.44  | 18.22  | 50.74  | 9.68   | 81.83  |
| 16 | 4  | 5.23   | 5.61   | 2.54   | 59.65  | 3.03   |
| 16 | 5  | 22.80  | 22.14  | 27.25  | 121.98 | 12.49  |
| 16 | 6  | 86.81  | 36.96  | 19.13  | 610.91 | 264.32 |
| 16 | 7  | 231.55 | 280.08 | 36.35  | 15.32  | 229.45 |

|    |    |        |        |        |        |        |
|----|----|--------|--------|--------|--------|--------|
| 16 | 8  | 97.80  | 121.64 | 123.00 | 19.89  | 532.62 |
| 16 | 9  | 173.85 | 197.45 | 487.81 | 86.64  | 169.85 |
| 16 | 10 | 148.19 | 122.72 | 8.34   | 93.77  | 69.75  |
| 16 | 11 | 23.55  | 14.94  | 11.11  | 61.28  | 42.21  |
| 16 | 12 | 127.96 | 179.52 | 141.86 | 171.14 | 222.91 |
| 16 | 13 | 8.82   | 12.70  | 171.49 | 82.13  | 64.09  |
| 16 | 14 | 64.24  | 4.85   | 185.52 | 189.28 | 89.07  |
| 16 | 15 | 90.55  | 124.72 | 169.49 | 232.46 | 295.37 |
| 16 | 16 | 175.94 | 68.20  | 133.52 | 231.81 | 63.93  |
| 16 | 17 | 65.10  | 37.85  | 19.99  | 58.88  | 21.46  |
| 16 | 18 | 271.64 | 336.70 | 11.02  | 275.49 | 54.55  |
| 16 | 19 | 32.63  | 48.27  | 21.21  | 251.79 | 378.17 |
| 16 | 20 | 169.90 | 136.45 | 35.15  | 161.59 | 67.65  |
| 16 | 21 | 19.82  | 65.33  | 66.84  | 51.36  | 161.79 |
| 16 | 22 | 302.09 | 246.20 | 31.06  | 174.54 | 35.86  |
| 16 | 23 | 70.58  | 18.62  | 30.60  | 45.35  | 39.38  |
| 16 | 24 | 393.62 | 388.82 | 16.32  | 49.18  | 74.26  |
| 16 | 25 | 361.57 | 341.22 | 5.94   | 39.71  | 47.86  |
| 16 | 26 | 9.88   | 7.83   | 2.28   | 70.45  | 65.87  |
| 16 | 27 | 14.81  | 24.35  | 12.38  | 5.00   | 28.21  |
| 16 | 28 | 20.72  | 8.20   | 3.91   | 36.31  | 62.98  |
| 16 | 29 | 164.41 | 128.02 | 7.31   | 6.32   | 80.52  |
| 16 | 30 | 11.29  | 204.44 | 34.77  | 20.47  | 23.88  |
| 17 | 0  | 226.28 | 230.60 | 211.46 | 140.97 | 210.83 |
| 17 | 1  | 33.99  | 30.31  | 9.92   | 80.04  | 6.11   |
| 17 | 2  | 24.20  | 20.36  | 9.62   | 67.94  | 29.48  |
| 17 | 3  | 24.64  | 27.34  | 49.36  | 15.31  | 64.14  |
| 17 | 4  | 21.82  | 21.42  | 10.48  | 79.89  | 12.67  |
| 17 | 5  | 23.57  | 22.45  | 86.46  | 68.39  | 18.45  |
| 17 | 6  | 25.60  | 16.69  | 60.62  | 254.71 | 106.34 |
| 17 | 7  | 65.61  | 113.01 | 68.68  | 21.82  | 92.32  |
| 17 | 8  | 65.93  | 97.04  | 137.34 | 77.41  | 177.54 |
| 17 | 9  | 51.80  | 45.50  | 64.66  | 131.20 | 487.27 |
| 17 | 10 | 349.34 | 271.56 | 39.23  | 39.80  | 136.01 |
| 17 | 11 | 61.07  | 30.84  | 48.12  | 49.63  | 26.66  |
| 17 | 12 | 506.15 | 565.98 | 218.71 | 526.63 | 56.80  |
| 17 | 13 | 17.36  | 52.96  | 346.81 | 216.80 | 294.98 |
| 17 | 14 | 87.33  | 6.30   | 165.82 | 125.46 | 190.13 |
| 17 | 15 | 106.63 | 88.25  | 334.93 | 117.44 | 134.69 |
| 17 | 16 | 357.34 | 479.60 | 150.05 | 308.19 | 129.73 |
| 17 | 17 | 13.18  | 37.97  | 327.63 | 80.86  | 99.37  |
| 17 | 18 | 323.66 | 200.21 | 95.41  | 411.52 | 159.55 |
| 17 | 19 | 59.07  | 43.94  | 41.59  | 143.15 | 136.58 |
| 17 | 20 | 265.18 | 212.24 | 145.96 | 39.26  | 56.13  |

|    |    |        |        |        |        |        |
|----|----|--------|--------|--------|--------|--------|
| 17 | 21 | 50.26  | 93.12  | 321.67 | 52.35  | 192.24 |
| 17 | 22 | 225.39 | 215.26 | 199.96 | 33.21  | 115.43 |
| 17 | 23 | 38.18  | 9.98   | 327.19 | 38.98  | 234.85 |
| 17 | 24 | 144.62 | 135.09 | 237.27 | 48.41  | 254.34 |
| 17 | 25 | 93.90  | 62.75  | 36.92  | 46.60  | 101.27 |
| 17 | 26 | 2.75   | 2.09   | 69.10  | 61.74  | 42.62  |
| 17 | 27 | 9.54   | 54.44  | 27.67  | 12.66  | 24.39  |
| 17 | 28 | 46.28  | 11.78  | 10.68  | 20.30  | 41.47  |
| 17 | 29 | 34.26  | 21.12  | 24.62  | 6.87   | 161.64 |
| 17 | 30 | 15.51  | 86.74  | 178.11 | 30.54  | 56.97  |
| 18 | 0  | 249.37 | 14.08  | 293.08 | 45.57  | 173.25 |
| 18 | 1  | 12.69  | 21.91  | 4.38   | 25.10  | 17.84  |
| 18 | 2  | 9.33   | 14.54  | 11.69  | 92.73  | 8.33   |
| 18 | 3  | 8.33   | 22.87  | 99.15  | 18.11  | 21.13  |
| 18 | 4  | 7.93   | 20.11  | 9.49   | 103.67 | 26.75  |
| 18 | 5  | 14.34  | 6.34   | 60.53  | 117.74 | 18.65  |
| 18 | 6  | 13.78  | 11.38  | 60.25  | 64.06  | 13.69  |
| 18 | 7  | 22.50  | 40.79  | 86.82  | 37.75  | 33.13  |
| 18 | 8  | 29.63  | 25.57  | 624.95 | 59.44  | 42.63  |
| 18 | 9  | 38.75  | 21.23  | 165.83 | 498.00 | 336.49 |
| 18 | 10 | 549.76 | 13.19  | 19.99  | 89.45  | 112.35 |
| 18 | 11 | 46.94  | 0.55   | 12.68  | 245.59 | 80.33  |
| 18 | 12 | 378.00 | 10.53  | 94.83  | 193.16 | 61.01  |
| 18 | 13 | 16.43  | 1.67   | 42.95  | 137.11 | 185.41 |
| 18 | 14 | 188.91 | 0.89   | 141.65 | 73.35  | 335.47 |
| 18 | 15 | 224.54 | 4.27   | 116.11 | 99.65  | 130.15 |
| 18 | 16 | 151.46 | 12.84  | 278.63 | 256.95 | 216.74 |
| 18 | 17 | 18.49  | 1.12   | 206.72 | 73.81  | 179.06 |
| 18 | 18 | 113.44 | 4.32   | 12.86  | 365.31 | 280.06 |
| 18 | 19 | 18.12  | 0.81   | 332.86 | 146.36 | 218.39 |
| 18 | 20 | 414.86 | 11.54  | 146.03 | 72.66  | 51.84  |
| 18 | 21 | 111.75 | 7.03   | 72.34  | 29.92  | 231.62 |
| 18 | 22 | 175.35 | 3.34   | 33.20  | 64.04  | 160.74 |
| 18 | 23 | 34.55  | 1.79   | 180.00 | 51.71  | 233.33 |
| 18 | 24 | 99.09  | 22.91  | 158.07 | 65.92  | 281.68 |
| 18 | 25 | 42.40  | 15.88  | 28.10  | 76.65  | 101.13 |
| 18 | 26 | 8.51   | 0.70   | 88.28  | 15.70  | 53.45  |
| 18 | 27 | 1.35   | 1.90   | 41.85  | 8.19   | 43.26  |
| 18 | 28 | 62.05  | 1.40   | 28.64  | 16.04  | 37.23  |
| 18 | 29 | 18.82  | 6.71   | 24.32  | 11.70  | 129.81 |
| 18 | 30 | 26.78  | 11.68  | 107.08 | 21.70  | 46.46  |
| 19 | 0  | 12.25  | 242.34 | 66.16  | 207.90 | 137.64 |
| 19 | 1  | 20.23  | 5.53   | 8.78   | 79.98  | 6.06   |
| 19 | 2  | 15.03  | 4.61   | 9.94   | 69.61  | 11.51  |

|    |    |       |        |        |        |        |
|----|----|-------|--------|--------|--------|--------|
| 19 | 3  | 18.74 | 7.51   | 21.38  | 10.76  | 19.00  |
| 19 | 4  | 8.23  | 5.21   | 56.21  | 66.71  | 22.81  |
| 19 | 5  | 11.55 | 10.46  | 164.33 | 71.17  | 13.37  |
| 19 | 6  | 8.32  | 5.64   | 41.99  | 87.77  | 69.96  |
| 19 | 7  | 41.47 | 10.98  | 193.93 | 22.06  | 95.15  |
| 19 | 8  | 29.21 | 24.44  | 165.70 | 16.98  | 51.50  |
| 19 | 9  | 24.13 | 45.06  | 589.12 | 218.81 | 454.63 |
| 19 | 10 | 5.93  | 619.36 | 347.83 | 199.01 | 304.37 |
| 19 | 11 | 0.92  | 17.19  | 25.75  | 150.33 | 13.38  |
| 19 | 12 | 12.54 | 245.87 | 14.42  | 191.37 | 64.32  |
| 19 | 13 | 0.79  | 15.07  | 75.37  | 366.75 | 38.80  |
| 19 | 14 | 0.69  | 19.40  | 71.56  | 53.81  | 83.05  |
| 19 | 15 | 1.66  | 287.76 | 41.11  | 54.17  | 103.79 |
| 19 | 16 | 6.84  | 106.52 | 46.96  | 215.63 | 151.51 |
| 19 | 17 | 0.79  | 25.01  | 61.82  | 24.60  | 99.58  |
| 19 | 18 | 5.17  | 33.78  | 42.52  | 78.82  | 236.24 |
| 19 | 19 | 2.18  | 33.98  | 59.29  | 168.52 | 212.53 |
| 19 | 20 | 11.91 | 366.95 | 61.58  | 107.60 | 63.75  |
| 19 | 21 | 2.80  | 201.81 | 88.41  | 72.13  | 179.55 |
| 19 | 22 | 8.94  | 225.62 | 32.74  | 230.79 | 45.10  |
| 19 | 23 | 2.96  | 14.76  | 131.53 | 58.49  | 269.77 |
| 19 | 24 | 21.57 | 129.79 | 148.63 | 60.26  | 333.10 |
| 19 | 25 | 16.77 | 60.90  | 19.60  | 92.37  | 118.68 |
| 19 | 26 | 1.13  | 6.36   | 28.52  | 351.90 | 100.43 |
| 19 | 27 | 1.27  | 50.62  | 7.69   | 35.91  | 16.80  |
| 19 | 28 | 1.79  | 4.62   | 23.37  | 321.39 | 40.38  |
| 19 | 29 | 6.64  | 19.24  | 12.85  | 15.30  | 148.86 |
| 19 | 30 | 3.69  | 151.98 | 52.58  | 43.04  | 60.47  |
| 20 | 0  | 9.26  | 18.46  | 97.66  | 65.30  | 61.99  |
| 20 | 1  | 14.85 | 16.55  | 2.35   | 64.25  | 7.87   |
| 20 | 2  | 8.03  | 19.04  | 4.19   | 41.75  | 10.82  |
| 20 | 3  | 20.15 | 17.02  | 42.14  | 6.11   | 25.28  |
| 20 | 4  | 20.58 | 18.70  | 6.44   | 30.79  | 25.19  |
| 20 | 5  | 3.90  | 10.85  | 35.69  | 64.98  | 17.91  |
| 20 | 6  | 5.65  | 14.81  | 25.84  | 83.44  | 59.99  |
| 20 | 7  | 9.58  | 33.07  | 29.09  | 13.88  | 83.78  |
| 20 | 8  | 3.97  | 21.33  | 53.86  | 26.96  | 58.87  |
| 20 | 9  | 6.44  | 18.94  | 69.75  | 251.05 | 431.26 |
| 20 | 10 | 2.22  | 9.09   | 28.62  | 170.99 | 266.42 |
| 20 | 11 | 2.18  | 0.93   | 40.84  | 83.64  | 44.48  |
| 20 | 12 | 17.93 | 26.53  | 104.19 | 92.14  | 50.44  |
| 20 | 13 | 0.56  | 4.06   | 428.58 | 269.73 | 73.10  |
| 20 | 14 | 1.63  | 0.99   | 303.99 | 36.68  | 85.99  |
| 20 | 15 | 1.62  | 3.72   | 140.47 | 60.63  | 199.78 |

|    |    |        |       |        |        |        |
|----|----|--------|-------|--------|--------|--------|
| 20 | 16 | 22.38  | 3.22  | 150.12 | 150.96 | 289.36 |
| 20 | 17 | 6.48   | 2.42  | 256.16 | 8.32   | 203.96 |
| 20 | 18 | 24.82  | 20.04 | 139.25 | 61.12  | 186.78 |
| 20 | 19 | 3.00   | 3.80  | 194.65 | 185.15 | 272.31 |
| 20 | 20 | 6.00   | 12.82 | 143.94 | 113.92 | 96.55  |
| 20 | 21 | 1.47   | 6.80  | 339.77 | 39.11  | 329.11 |
| 20 | 22 | 16.58  | 15.97 | 171.61 | 140.99 | 126.71 |
| 20 | 23 | 3.58   | 2.78  | 45.24  | 49.75  | 189.84 |
| 20 | 24 | 24.02  | 32.90 | 181.10 | 97.16  | 193.30 |
| 20 | 25 | 14.63  | 23.49 | 23.39  | 146.29 | 65.30  |
| 20 | 26 | 1.61   | 0.31  | 98.48  | 476.33 | 47.56  |
| 20 | 27 | 1.04   | 4.08  | 90.48  | 41.19  | 29.69  |
| 20 | 28 | 2.04   | 1.20  | 26.02  | 504.32 | 37.84  |
| 20 | 29 | 5.61   | 9.73  | 14.30  | 18.14  | 85.65  |
| 20 | 30 | 1.76   | 17.06 | 49.48  | 39.00  | 41.39  |
| 21 | 0  | 219.79 | 32.87 | 103.13 | 21.69  | 113.30 |
| 21 | 1  | 6.80   | 7.89  | 8.54   | 20.95  | 6.05   |
| 21 | 2  | 12.17  | 7.16  | 19.61  | 44.10  | 22.76  |
| 21 | 3  | 6.79   | 1.22  | 21.20  | 5.76   | 64.35  |
| 21 | 4  | 2.37   | 5.65  | 16.96  | 23.68  | 12.35  |
| 21 | 5  | 27.28  | 5.41  | 38.63  | 70.11  | 14.48  |
| 21 | 6  | 8.05   | 4.04  | 26.49  | 26.01  | 25.50  |
| 21 | 7  | 33.06  | 11.80 | 47.98  | 34.36  | 19.74  |
| 21 | 8  | 19.31  | 6.65  | 23.37  | 108.39 | 30.79  |
| 21 | 9  | 30.74  | 4.16  | 111.51 | 397.15 | 61.14  |
| 21 | 10 | 70.10  | 17.35 | 54.72  | 36.16  | 64.37  |
| 21 | 11 | 23.02  | 1.97  | 26.41  | 205.71 | 70.81  |
| 21 | 12 | 176.09 | 49.87 | 77.10  | 441.60 | 24.34  |
| 21 | 13 | 8.66   | 6.70  | 16.08  | 170.16 | 359.68 |
| 21 | 14 | 32.87  | 1.80  | 171.28 | 109.27 | 305.92 |
| 21 | 15 | 34.79  | 8.15  | 175.10 | 76.08  | 114.92 |
| 21 | 16 | 363.22 | 14.42 | 112.59 | 56.83  | 201.78 |
| 21 | 17 | 86.18  | 4.41  | 136.53 | 26.63  | 148.02 |
| 21 | 18 | 440.08 | 59.52 | 110.46 | 40.82  | 350.26 |
| 21 | 19 | 59.41  | 6.75  | 143.52 | 25.92  | 200.49 |
| 21 | 20 | 156.87 | 23.68 | 168.99 | 37.96  | 76.19  |
| 21 | 21 | 40.30  | 13.02 | 176.29 | 22.24  | 314.52 |
| 21 | 22 | 284.55 | 34.43 | 98.27  | 63.66  | 79.33  |
| 21 | 23 | 73.52  | 3.40  | 250.06 | 47.86  | 157.92 |
| 21 | 24 | 461.69 | 64.29 | 276.54 | 45.24  | 174.93 |
| 21 | 25 | 321.85 | 45.95 | 27.66  | 66.23  | 37.12  |
| 21 | 26 | 18.91  | 1.91  | 34.49  | 103.13 | 65.39  |
| 21 | 27 | 16.95  | 6.87  | 55.82  | 18.69  | 19.15  |
| 21 | 28 | 40.12  | 1.24  | 51.34  | 93.44  | 48.52  |



|    |    |        |        |        |        |        |
|----|----|--------|--------|--------|--------|--------|
| 21 | 29 | 133.14 | 16.79  | 24.40  | 10.72  | 116.53 |
| 21 | 30 | 9.26   | 31.99  | 90.30  | 22.95  | 43.62  |
| 22 | 0  | 25.52  | 241.19 | 119.90 | 12.20  | 130.02 |
| 22 | 1  | 13.45  | 4.99   | 6.92   | 7.99   | 5.61   |
| 22 | 2  | 18.25  | 13.60  | 16.13  | 23.10  | 10.12  |
| 22 | 3  | 11.28  | 18.57  | 15.82  | 3.94   | 89.01  |
| 22 | 4  | 8.68   | 2.22   | 19.93  | 15.84  | 10.29  |
| 22 | 5  | 12.30  | 25.73  | 32.11  | 38.48  | 4.02   |
| 22 | 6  | 7.62   | 7.72   | 25.05  | 12.62  | 79.08  |
| 22 | 7  | 31.64  | 15.25  | 71.64  | 20.20  | 35.92  |
| 22 | 8  | 22.00  | 23.62  | 13.59  | 60.92  | 84.53  |
| 22 | 9  | 19.99  | 32.48  | 163.09 | 213.30 | 38.12  |
| 22 | 10 | 11.46  | 151.03 | 78.23  | 9.80   | 43.18  |
| 22 | 11 | 6.19   | 19.62  | 34.37  | 106.34 | 29.84  |
| 22 | 12 | 69.19  | 406.94 | 87.03  | 238.45 | 45.44  |
| 22 | 13 | 1.49   | 49.77  | 80.68  | 98.62  | 91.58  |
| 22 | 14 | 4.68   | 13.60  | 135.15 | 60.34  | 145.19 |
| 22 | 15 | 4.81   | 59.45  | 206.31 | 41.22  | 31.81  |
| 22 | 16 | 32.48  | 73.59  | 96.82  | 15.61  | 50.80  |
| 22 | 17 | 7.22   | 22.74  | 185.04 | 20.43  | 51.96  |
| 22 | 18 | 19.58  | 410.55 | 132.27 | 37.25  | 272.57 |
| 22 | 19 | 6.29   | 50.52  | 139.20 | 14.21  | 82.67  |
| 22 | 20 | 16.70  | 184.58 | 185.68 | 17.91  | 59.39  |
| 22 | 21 | 2.58   | 99.87  | 173.76 | 18.60  | 172.58 |
| 22 | 22 | 20.92  | 247.39 | 97.57  | 34.60  | 48.46  |
| 22 | 23 | 2.05   | 23.15  | 264.74 | 23.36  | 207.89 |
| 22 | 24 | 45.08  | 443.15 | 322.70 | 25.38  | 134.13 |
| 22 | 25 | 15.16  | 314.47 | 33.68  | 31.08  | 123.55 |
| 22 | 26 | 2.17   | 8.89   | 52.31  | 50.33  | 523.86 |
| 22 | 27 | 0.96   | 56.16  | 30.78  | 12.45  | 185.32 |
| 22 | 28 | 7.08   | 9.78   | 55.27  | 40.20  | 463.13 |
| 22 | 29 | 2.41   | 115.47 | 26.70  | 5.67   | 53.90  |
| 22 | 30 | 4.04   | 224.75 | 98.58  | 10.75  | 20.40  |
| 23 | 0  | 228.28 | 244.53 | 142.61 | 18.12  | 3.58   |
| 23 | 1  | 14.87  | 5.15   | 6.56   | 4.74   | 4.74   |
| 23 | 2  | 18.82  | 10.33  | 8.08   | 3.49   | 5.85   |
| 23 | 3  | 25.96  | 23.75  | 75.52  | 0.70   | 7.68   |
| 23 | 4  | 7.51   | 4.11   | 4.41   | 3.64   | 7.35   |
| 23 | 5  | 21.30  | 15.43  | 65.44  | 8.10   | 3.33   |
| 23 | 6  | 14.75  | 16.19  | 54.08  | 6.31   | 5.64   |
| 23 | 7  | 18.61  | 34.02  | 65.05  | 1.55   | 3.21   |
| 23 | 8  | 11.57  | 16.17  | 76.23  | 4.50   | 5.96   |
| 23 | 9  | 19.94  | 19.94  | 60.19  | 8.47   | 25.46  |
| 23 | 10 | 148.22 | 155.72 | 31.00  | 6.06   | 16.11  |

|    |    |        |        |        |        |       |
|----|----|--------|--------|--------|--------|-------|
| 23 | 11 | 73.03  | 24.24  | 45.95  | 3.73   | 5.90  |
| 23 | 12 | 686.67 | 545.82 | 65.24  | 2.37   | 3.62  |
| 23 | 13 | 10.76  | 51.96  | 438.69 | 14.86  | 18.21 |
| 23 | 14 | 46.43  | 16.67  | 172.66 | 4.24   | 26.87 |
| 23 | 15 | 33.49  | 56.84  | 200.03 | 5.36   | 12.98 |
| 23 | 16 | 236.52 | 280.53 | 111.57 | 13.87  | 13.99 |
| 23 | 17 | 48.08  | 45.44  | 227.11 | 3.14   | 10.32 |
| 23 | 18 | 77.89  | 367.10 | 128.16 | 16.37  | 7.93  |
| 23 | 19 | 55.99  | 57.17  | 199.07 | 21.40  | 10.56 |
| 23 | 20 | 187.81 | 154.48 | 45.01  | 9.55   | 3.21  |
| 23 | 21 | 28.73  | 85.43  | 44.90  | 226.56 | 6.92  |
| 23 | 22 | 231.13 | 224.45 | 38.02  | 58.87  | 8.86  |
| 23 | 23 | 31.76  | 12.28  | 227.33 | 105.44 | 11.84 |
| 23 | 24 | 368.44 | 414.15 | 209.42 | 33.64  | 7.03  |
| 23 | 25 | 137.90 | 150.99 | 51.67  | 2.40   | 4.31  |
| 23 | 26 | 13.78  | 8.06   | 333.80 | 33.87  | 25.46 |
| 23 | 27 | 13.59  | 56.38  | 246.06 | 189.42 | 10.56 |
| 23 | 28 | 63.18  | 9.82   | 87.08  | 18.82  | 26.55 |
| 23 | 29 | 21.90  | 52.01  | 12.46  | 28.72  | 7.58  |
| 23 | 30 | 30.69  | 147.06 | 100.29 | 6.59   | 2.70  |
| 24 | 0  | 211.32 | 194.28 | 57.06  | 200.94 | 4.53  |
| 24 | 1  | 5.18   | 5.09   | 1.52   | 70.55  | 4.47  |
| 24 | 2  | 14.44  | 9.14   | 9.44   | 21.55  | 12.24 |
| 24 | 3  | 7.42   | 10.46  | 81.15  | 4.56   | 8.83  |
| 24 | 4  | 3.05   | 1.29   | 6.20   | 32.69  | 2.79  |
| 24 | 5  | 20.81  | 16.82  | 57.86  | 67.81  | 4.96  |
| 24 | 6  | 5.98   | 6.96   | 38.70  | 90.59  | 8.70  |
| 24 | 7  | 25.16  | 21.06  | 31.85  | 9.96   | 4.88  |
| 24 | 8  | 28.13  | 26.88  | 55.97  | 28.22  | 7.34  |
| 24 | 9  | 3.34   | 6.54   | 15.88  | 41.08  | 45.94 |
| 24 | 10 | 74.24  | 71.01  | 19.31  | 98.10  | 19.80 |
| 24 | 11 | 20.48  | 10.58  | 36.05  | 55.84  | 8.99  |
| 24 | 12 | 121.78 | 120.53 | 57.42  | 99.62  | 5.34  |
| 24 | 13 | 4.98   | 12.72  | 311.85 | 107.20 | 32.56 |
| 24 | 14 | 18.62  | 2.39   | 160.74 | 48.18  | 38.28 |
| 24 | 15 | 39.52  | 46.80  | 161.40 | 51.51  | 21.97 |
| 24 | 16 | 329.22 | 158.09 | 38.30  | 86.98  | 15.66 |
| 24 | 17 | 89.18  | 36.15  | 86.18  | 36.14  | 13.94 |
| 24 | 18 | 395.22 | 481.80 | 28.85  | 205.12 | 20.23 |
| 24 | 19 | 23.57  | 16.64  | 57.63  | 197.30 | 12.69 |
| 24 | 20 | 103.34 | 110.69 | 94.50  | 112.90 | 6.75  |
| 24 | 21 | 38.67  | 66.10  | 91.02  | 87.08  | 10.59 |
| 24 | 22 | 115.69 | 116.90 | 81.11  | 307.14 | 9.70  |
| 24 | 23 | 32.06  | 11.84  | 118.03 | 92.89  | 23.24 |

|    |    |        |        |        |        |        |
|----|----|--------|--------|--------|--------|--------|
| 24 | 24 | 172.56 | 215.64 | 97.43  | 88.50  | 16.64  |
| 24 | 25 | 303.20 | 286.10 | 35.65  | 122.04 | 8.33   |
| 24 | 26 | 14.85  | 8.27   | 549.76 | 372.77 | 38.07  |
| 24 | 27 | 17.14  | 387.59 | 461.48 | 15.35  | 15.17  |
| 24 | 28 | 391.38 | 34.89  | 173.04 | 101.64 | 39.59  |
| 24 | 29 | 270.53 | 287.90 | 14.59  | 5.57   | 9.86   |
| 24 | 30 | 49.54  | 253.88 | 68.34  | 53.32  | 3.96   |
| 25 | 0  | 44.34  | 46.56  | 132.21 | 135.27 | 73.94  |
| 25 | 1  | 13.71  | 9.49   | 5.49   | 25.46  | 8.97   |
| 25 | 2  | 7.51   | 6.58   | 11.14  | 20.25  | 13.92  |
| 25 | 3  | 13.72  | 5.64   | 68.51  | 4.99   | 77.48  |
| 25 | 4  | 15.78  | 6.79   | 5.86   | 12.03  | 12.89  |
| 25 | 5  | 13.42  | 11.79  | 50.16  | 22.99  | 2.49   |
| 25 | 6  | 2.53   | 4.56   | 39.67  | 18.47  | 46.68  |
| 25 | 7  | 18.52  | 18.84  | 50.47  | 5.67   | 22.45  |
| 25 | 8  | 18.18  | 21.88  | 83.51  | 14.42  | 56.76  |
| 25 | 9  | 5.66   | 6.19   | 13.87  | 54.08  | 55.02  |
| 25 | 10 | 56.00  | 57.72  | 26.90  | 58.83  | 60.13  |
| 25 | 11 | 3.27   | 1.36   | 41.14  | 20.15  | 83.45  |
| 25 | 12 | 66.69  | 58.16  | 140.13 | 47.62  | 67.71  |
| 25 | 13 | 9.99   | 14.82  | 236.90 | 162.76 | 304.93 |
| 25 | 14 | 34.66  | 8.17   | 152.29 | 54.06  | 355.73 |
| 25 | 15 | 27.93  | 44.62  | 186.93 | 65.99  | 126.11 |
| 25 | 16 | 276.05 | 150.88 | 81.41  | 96.05  | 174.38 |
| 25 | 17 | 74.90  | 36.06  | 262.28 | 39.62  | 139.39 |
| 25 | 18 | 292.92 | 399.08 | 173.37 | 233.55 | 251.21 |
| 25 | 19 | 23.12  | 16.58  | 98.52  | 161.03 | 110.17 |
| 25 | 20 | 89.93  | 84.62  | 186.13 | 101.18 | 45.39  |
| 25 | 21 | 36.32  | 52.93  | 125.98 | 123.11 | 33.41  |
| 25 | 22 | 61.93  | 65.35  | 86.30  | 348.73 | 105.96 |
| 25 | 23 | 25.72  | 13.24  | 207.60 | 104.10 | 219.34 |
| 25 | 24 | 162.56 | 209.59 | 266.26 | 13.55  | 191.10 |
| 25 | 25 | 198.48 | 193.22 | 53.28  | 47.68  | 93.85  |
| 25 | 26 | 14.72  | 11.66  | 305.22 | 191.69 | 312.84 |
| 25 | 27 | 21.85  | 484.41 | 15.24  | 54.44  | 110.64 |
| 25 | 28 | 489.33 | 54.84  | 45.94  | 439.17 | 310.23 |
| 25 | 29 | 493.09 | 505.75 | 36.23  | 16.85  | 117.89 |
| 25 | 30 | 67.64  | 190.22 | 159.13 | 71.80  | 43.10  |
| 26 | 0  | 6.76   | 7.22   | 1.10   | 19.04  | 110.35 |
| 26 | 1  | 2.80   | 5.32   | 2.95   | 5.14   | 2.18   |
| 26 | 2  | 12.53  | 40.26  | 3.07   | 3.18   | 5.44   |
| 26 | 3  | 4.92   | 12.58  | 0.66   | 1.20   | 33.46  |
| 26 | 4  | 3.79   | 1.12   | 4.42   | 5.04   | 5.62   |
| 26 | 5  | 15.26  | 15.11  | 2.29   | 7.74   | 9.83   |

|    |    |       |       |        |        |        |
|----|----|-------|-------|--------|--------|--------|
| 26 | 6  | 15.10 | 29.56 | 4.30   | 2.59   | 87.94  |
| 26 | 7  | 9.33  | 3.76  | 1.72   | 2.83   | 26.67  |
| 26 | 8  | 13.49 | 4.82  | 2.13   | 7.69   | 60.49  |
| 26 | 9  | 14.14 | 3.25  | 7.00   | 24.64  | 18.11  |
| 26 | 10 | 1.17  | 0.55  | 3.50   | 14.98  | 16.88  |
| 26 | 11 | 0.50  | 2.65  | 0.69   | 7.91   | 70.96  |
| 26 | 12 | 1.87  | 1.91  | 1.96   | 26.70  | 43.70  |
| 26 | 13 | 0.89  | 1.76  | 3.32   | 9.56   | 287.40 |
| 26 | 14 | 0.57  | 0.40  | 3.82   | 5.52   | 297.57 |
| 26 | 15 | 2.49  | 1.48  | 2.61   | 10.09  | 119.27 |
| 26 | 16 | 21.14 | 2.76  | 1.99   | 14.46  | 219.77 |
| 26 | 17 | 6.23  | 1.95  | 1.93   | 10.68  | 160.35 |
| 26 | 18 | 24.30 | 8.16  | 1.68   | 19.77  | 298.65 |
| 26 | 19 | 2.13  | 1.28  | 0.59   | 156.27 | 142.78 |
| 26 | 20 | 7.52  | 3.21  | 1.72   | 199.11 | 41.26  |
| 26 | 21 | 3.01  | 1.20  | 0.93   | 4.66   | 69.37  |
| 26 | 22 | 7.93  | 3.84  | 0.68   | 86.81  | 107.63 |
| 26 | 23 | 2.97  | 0.45  | 2.80   | 479.17 | 163.55 |
| 26 | 24 | 10.39 | 6.44  | 1.73   | 257.64 | 196.78 |
| 26 | 25 | 13.42 | 7.07  | 1.07   | 109.50 | 142.07 |
| 26 | 26 | 1.23  | 0.26  | 1.27   | 27.45  | 280.73 |
| 26 | 27 | 3.23  | 1.47  | 0.65   | 629.50 | 97.47  |
| 26 | 28 | 14.64 | 1.44  | 0.65   | 66.79  | 80.79  |
| 26 | 29 | 11.78 | 2.80  | 0.29   | 200.83 | 142.12 |
| 26 | 30 | 2.48  | 4.42  | 1.55   | 22.67  | 40.80  |
| 27 | 0  | 9.05  | 6.27  | 198.03 | 5.06   | 194.15 |
| 27 | 1  | 9.61  | 1.16  | 5.64   | 2.43   | 5.16   |
| 27 | 2  | 47.19 | 6.93  | 4.94   | 3.27   | 7.02   |
| 27 | 3  | 11.47 | 2.62  | 24.99  | 0.28   | 33.82  |
| 27 | 4  | 1.41  | 1.28  | 8.43   | 2.76   | 3.73   |
| 27 | 5  | 18.75 | 8.14  | 25.03  | 2.53   | 4.47   |
| 27 | 6  | 31.58 | 7.07  | 16.40  | 5.14   | 42.98  |
| 27 | 7  | 13.19 | 10.49 | 17.88  | 2.47   | 14.95  |
| 27 | 8  | 10.25 | 8.83  | 31.39  | 2.67   | 49.06  |
| 27 | 9  | 7.57  | 9.19  | 15.90  | 4.42   | 24.06  |
| 27 | 10 | 1.31  | 1.47  | 6.23   | 15.36  | 30.09  |
| 27 | 11 | 1.58  | 0.28  | 16.37  | 14.10  | 31.38  |
| 27 | 12 | 3.99  | 1.37  | 46.12  | 7.48   | 105.35 |
| 27 | 13 | 0.77  | 0.32  | 80.56  | 6.41   | 139.73 |
| 27 | 14 | 1.18  | 1.33  | 68.56  | 7.64   | 63.26  |
| 27 | 15 | 1.84  | 2.57  | 82.40  | 4.82   | 116.56 |
| 27 | 16 | 3.26  | 3.81  | 77.36  | 2.81   | 106.25 |
| 27 | 17 | 2.64  | 1.51  | 331.72 | 1.55   | 96.79  |
| 27 | 18 | 4.27  | 11.41 | 214.73 | 28.52  | 389.43 |

|    |    |        |        |        |        |        |
|----|----|--------|--------|--------|--------|--------|
| 27 | 19 | 1.45   | 0.87   | 262.77 | 77.32  | 148.08 |
| 27 | 20 | 4.27   | 3.73   | 110.99 | 112.35 | 69.78  |
| 27 | 21 | 0.21   | 2.56   | 70.60  | 508.55 | 224.21 |
| 27 | 22 | 5.18   | 9.40   | 76.84  | 196.65 | 83.35  |
| 27 | 23 | 1.47   | 1.38   | 382.76 | 10.45  | 318.15 |
| 27 | 24 | 7.83   | 5.95   | 47.57  | 37.98  | 81.16  |
| 27 | 25 | 10.13  | 10.44  | 54.17  | 38.98  | 140.16 |
| 27 | 26 | 0.66   | 1.04   | 335.59 | 35.42  | 315.23 |
| 27 | 27 | 1.18   | 11.25  | 191.47 | 371.17 | 133.09 |
| 27 | 28 | 5.24   | 1.17   | 55.49  | 50.61  | 173.35 |
| 27 | 29 | 7.57   | 3.35   | 59.55  | 89.47  | 289.98 |
| 27 | 30 | 1.16   | 10.85  | 303.27 | 13.60  | 105.87 |
| 28 | 0  | 208.94 | 206.16 | 104.10 | 3.77   | 115.14 |
| 28 | 1  | 16.17  | 7.85   | 1.77   | 14.42  | 1.31   |
| 28 | 2  | 14.35  | 9.75   | 1.97   | 3.15   | 4.43   |
| 28 | 3  | 6.69   | 12.32  | 6.68   | 1.12   | 15.95  |
| 28 | 4  | 12.92  | 7.13   | 2.50   | 15.06  | 0.40   |
| 28 | 5  | 16.94  | 12.73  | 15.37  | 6.10   | 1.80   |
| 28 | 6  | 6.50   | 5.86   | 10.41  | 1.71   | 23.09  |
| 28 | 7  | 11.92  | 10.85  | 10.82  | 5.88   | 7.68   |
| 28 | 8  | 20.62  | 19.61  | 19.05  | 20.60  | 14.70  |
| 28 | 9  | 5.23   | 8.48   | 6.92   | 28.41  | 2.11   |
| 28 | 10 | 113.53 | 112.92 | 3.32   | 8.98   | 9.11   |
| 28 | 11 | 6.87   | 2.65   | 5.35   | 19.46  | 10.31  |
| 28 | 12 | 49.30  | 55.33  | 119.22 | 70.31  | 122.94 |
| 28 | 13 | 8.44   | 6.22   | 50.46  | 26.73  | 27.87  |
| 28 | 14 | 46.34  | 3.22   | 50.02  | 12.04  | 52.29  |
| 28 | 15 | 56.36  | 68.51  | 77.59  | 15.85  | 125.22 |
| 28 | 16 | 113.00 | 67.20  | 90.91  | 29.46  | 96.87  |
| 28 | 17 | 30.24  | 7.03   | 39.01  | 7.26   | 49.76  |
| 28 | 18 | 167.57 | 153.98 | 12.36  | 40.03  | 29.48  |
| 28 | 19 | 12.77  | 9.69   | 105.51 | 21.31  | 119.16 |
| 28 | 20 | 59.47  | 56.41  | 177.84 | 6.88   | 45.26  |
| 28 | 21 | 11.06  | 28.33  | 178.22 | 102.15 | 216.01 |
| 28 | 22 | 297.54 | 293.80 | 136.68 | 31.16  | 127.15 |
| 28 | 23 | 81.66  | 33.24  | 344.51 | 30.57  | 308.71 |
| 28 | 24 | 95.06  | 109.68 | 352.14 | 11.10  | 303.94 |
| 28 | 25 | 326.67 | 328.11 | 92.54  | 4.27   | 243.63 |
| 28 | 26 | 17.98  | 11.47  | 134.73 | 5.08   | 148.97 |
| 28 | 27 | 13.27  | 328.76 | 453.84 | 77.11  | 109.83 |
| 28 | 28 | 315.87 | 25.34  | 167.53 | 2.36   | 470.02 |
| 28 | 29 | 257.54 | 202.01 | 51.81  | 12.68  | 228.65 |
| 28 | 30 | 33.00  | 275.17 | 239.23 | 0.66   | 70.17  |
| 29 | 0  | 108.90 | 104.86 | 81.11  | 134.25 | 46.67  |

|    |    |        |        |        |        |        |
|----|----|--------|--------|--------|--------|--------|
| 29 | 1  | 12.60  | 7.17   | 2.46   | 56.15  | 1.85   |
| 29 | 2  | 20.22  | 15.74  | 12.12  | 14.57  | 9.51   |
| 29 | 3  | 7.65   | 8.69   | 61.07  | 5.10   | 40.74  |
| 29 | 4  | 12.22  | 5.21   | 1.68   | 31.16  | 2.15   |
| 29 | 5  | 14.33  | 14.16  | 21.83  | 35.56  | 2.99   |
| 29 | 6  | 11.89  | 8.71   | 14.33  | 114.53 | 42.85  |
| 29 | 7  | 16.85  | 18.88  | 15.04  | 8.69   | 10.07  |
| 29 | 8  | 17.90  | 19.47  | 13.73  | 17.10  | 18.84  |
| 29 | 9  | 16.00  | 17.28  | 3.66   | 37.11  | 11.46  |
| 29 | 10 | 25.07  | 22.72  | 1.76   | 18.86  | 8.61   |
| 29 | 11 | 5.45   | 1.51   | 4.87   | 17.07  | 8.16   |
| 29 | 12 | 60.40  | 51.80  | 61.61  | 44.09  | 53.76  |
| 29 | 13 | 1.85   | 6.11   | 52.59  | 25.23  | 29.15  |
| 29 | 14 | 18.94  | 4.62   | 25.67  | 57.16  | 27.62  |
| 29 | 15 | 24.73  | 30.17  | 38.13  | 108.07 | 40.39  |
| 29 | 16 | 37.37  | 29.30  | 19.81  | 91.45  | 35.20  |
| 29 | 17 | 9.09   | 7.35   | 122.10 | 16.15  | 26.93  |
| 29 | 18 | 24.96  | 21.01  | 88.07  | 86.71  | 92.02  |
| 29 | 19 | 9.26   | 10.41  | 126.41 | 54.79  | 13.13  |
| 29 | 20 | 22.87  | 19.27  | 35.53  | 36.66  | 8.64   |
| 29 | 21 | 16.75  | 20.19  | 19.79  | 13.11  | 25.35  |
| 29 | 22 | 308.81 | 310.88 | 23.55  | 131.23 | 16.16  |
| 29 | 23 | 85.63  | 36.37  | 45.99  | 35.89  | 58.89  |
| 29 | 24 | 152.14 | 24.12  | 112.52 | 32.15  | 48.09  |
| 29 | 25 | 479.31 | 500.34 | 14.78  | 44.12  | 43.33  |
| 29 | 26 | 24.68  | 15.99  | 39.19  | 141.69 | 42.17  |
| 29 | 27 | 19.37  | 279.83 | 68.22  | 23.97  | 12.94  |
| 29 | 28 | 279.85 | 40.58  | 24.99  | 134.97 | 41.14  |
| 29 | 29 | 387.78 | 424.46 | 22.50  | 14.20  | 22.40  |
| 29 | 30 | 35.52  | 302.36 | 119.29 | 37.32  | 9.73   |
| 30 | 0  | 80.05  | 106.91 | 139.66 | 91.50  | 133.36 |
| 30 | 1  | 61.82  | 38.31  | 2.18   | 34.22  | 2.92   |
| 30 | 2  | 20.01  | 16.11  | 10.85  | 21.61  | 11.52  |
| 30 | 3  | 119.19 | 52.18  | 56.72  | 7.47   | 59.50  |
| 30 | 4  | 107.99 | 51.62  | 3.15   | 48.13  | 2.75   |
| 30 | 5  | 23.57  | 10.00  | 23.12  | 25.76  | 4.62   |
| 30 | 6  | 13.63  | 6.86   | 16.20  | 54.17  | 39.65  |
| 30 | 7  | 22.48  | 18.71  | 16.46  | 8.27   | 38.19  |
| 30 | 8  | 26.99  | 16.66  | 116.58 | 13.91  | 114.64 |
| 30 | 9  | 19.40  | 17.24  | 22.45  | 77.50  | 9.85   |
| 30 | 10 | 40.63  | 106.65 | 9.94   | 123.32 | 16.09  |
| 30 | 11 | 11.98  | 3.27   | 6.30   | 73.64  | 11.72  |
| 30 | 12 | 96.87  | 68.53  | 18.70  | 16.71  | 62.16  |
| 30 | 13 | 7.54   | 9.13   | 27.98  | 102.17 | 58.20  |

|    |    |        |        |        |        |        |
|----|----|--------|--------|--------|--------|--------|
| 30 | 14 | 2.56   | 5.48   | 51.66  | 33.42  | 43.89  |
| 30 | 15 | 13.09  | 77.16  | 31.31  | 48.15  | 97.16  |
| 30 | 16 | 98.30  | 87.26  | 120.35 | 48.52  | 69.08  |
| 30 | 17 | 7.85   | 8.65   | 150.80 | 9.82   | 40.16  |
| 30 | 18 | 81.76  | 58.11  | 68.12  | 44.80  | 66.62  |
| 30 | 19 | 16.67  | 16.83  | 42.95  | 72.37  | 105.38 |
| 30 | 20 | 83.64  | 77.24  | 88.04  | 52.04  | 13.73  |
| 30 | 21 | 13.90  | 45.44  | 61.34  | 117.36 | 44.07  |
| 30 | 22 | 132.20 | 165.21 | 36.14  | 103.82 | 22.64  |
| 30 | 23 | 29.75  | 15.54  | 63.21  | 47.64  | 60.22  |
| 30 | 24 | 105.13 | 58.67  | 153.33 | 30.72  | 140.64 |
| 30 | 25 | 86.89  | 171.09 | 28.48  | 15.16  | 82.36  |
| 30 | 26 | 2.92   | 5.36   | 159.94 | 26.87  | 166.86 |
| 30 | 27 | 0.97   | 159.08 | 97.73  | 61.56  | 54.66  |
| 30 | 28 | 96.30  | 16.34  | 39.14  | 27.38  | 119.16 |
| 30 | 29 | 15.76  | 93.54  | 51.93  | 10.52  | 252.28 |
| 30 | 30 | 6.87   | 151.32 | 248.65 | 9.08   | 87.80  |

**Table S26.** The original SOC matrix elements calculated for I-Al(qBr<sub>2</sub>)<sub>3</sub>.

| States |    | SOC elements /cm <sup>-1</sup> |             |             |             |             |
|--------|----|--------------------------------|-------------|-------------|-------------|-------------|
| Ti     | Sj | Conformer 1                    | Conformer 2 | Conformer 3 | Conformer 4 | Conformer 5 |
| 1      | 0  | 5.61                           | 2.71        | 13.89       | 0.19        | 7.14        |
| 1      | 1  | 128.44                         | 57.21       | 17.70       | 0.65        | 0.52        |
| 1      | 2  | 620.05                         | 88.40       | 642.61      | 1.12        | 655.80      |
| 1      | 3  | 604.14                         | 71.06       | 619.27      | 1.10        | 666.85      |
| 1      | 4  | 14.92                          | 9.89        | 24.83       | 0.65        | 26.77       |
| 1      | 5  | 40.22                          | 4.48        | 19.57       | 2.53        | 7.45        |
| 1      | 6  | 26.31                          | 16.30       | 19.99       | 1.96        | 10.98       |
| 1      | 7  | 33.83                          | 4.85        | 22.29       | 2.68        | 5.83        |
| 1      | 8  | 28.48                          | 3.41        | 27.47       | 2.16        | 1.47        |
| 1      | 9  | 37.98                          | 0.29        | 30.00       | 2.21        | 33.10       |
| 1      | 10 | 63.27                          | 1.66        | 38.10       | 1.27        | 0.79        |
| 1      | 11 | 0.49                           | 3.85        | 4.30        | 2.10        | 0.94        |
| 1      | 12 | 9.43                           | 1.71        | 2.07        | 2.39        | 2.68        |
| 1      | 13 | 16.43                          | 0.39        | 5.63        | 1.02        | 41.66       |
| 1      | 14 | 2.64                           | 6.14        | 8.63        | 1.67        | 128.11      |
| 1      | 15 | 2.83                           | 0.37        | 4.25        | 1.68        | 2.35        |
| 1      | 16 | 46.26                          | 0.63        | 41.65       | 1.04        | 28.74       |
| 1      | 17 | 16.69                          | 0.96        | 3.43        | 0.42        | 59.01       |
| 1      | 18 | 70.56                          | 1.56        | 14.62       | 0.12        | 0.60        |
| 1      | 19 | 2.95                           | 0.82        | 36.93       | 3.34        | 1.48        |
| 1      | 20 | 1.61                           | 1.65        | 16.50       | 0.04        | 0.93        |

|   |    |        |        |        |        |        |
|---|----|--------|--------|--------|--------|--------|
| 1 | 21 | 2.66   | 1.22   | 157.77 | 1.54   | 1.14   |
| 1 | 22 | 3.04   | 5.06   | 23.34  | 0.38   | 4.93   |
| 1 | 23 | 0.85   | 18.55  | 6.42   | 0.75   | 140.81 |
| 1 | 24 | 1.71   | 3.29   | 1.73   | 0.08   | 8.70   |
| 1 | 25 | 2.02   | 1.23   | 14.89  | 0.04   | 1.99   |
| 1 | 26 | 4.38   | 0.31   | 88.29  | 0.55   | 0.76   |
| 1 | 27 | 0.68   | 0.30   | 4.44   | 0.07   | 2.03   |
| 1 | 28 | 2.32   | 1.14   | 2.04   | 0.02   | 2.91   |
| 1 | 29 | 5.66   | 12.57  | 5.98   | 0.01   | 0.85   |
| 1 | 30 | 119.27 | 10.84  | 8.26   | 0.09   | 68.03  |
| 2 | 0  | 14.75  | 15.93  | 16.95  | 7.81   | 1.10   |
| 2 | 1  | 629.83 | 3.42   | 649.98 | 38.45  | 655.34 |
| 2 | 2  | 148.76 | 650.03 | 25.57  | 35.65  | 0.88   |
| 2 | 3  | 474.60 | 558.43 | 510.75 | 27.13  | 442.51 |
| 2 | 4  | 12.20  | 21.14  | 30.99  | 3.54   | 16.05  |
| 2 | 5  | 31.82  | 22.96  | 13.91  | 3.37   | 4.44   |
| 2 | 6  | 25.55  | 112.53 | 39.86  | 2.03   | 7.01   |
| 2 | 7  | 21.15  | 29.38  | 30.94  | 0.23   | 1.69   |
| 2 | 8  | 15.74  | 4.27   | 17.94  | 1.96   | 2.70   |
| 2 | 9  | 20.91  | 10.61  | 46.72  | 2.30   | 12.04  |
| 2 | 10 | 91.34  | 2.84   | 40.79  | 2.14   | 1.79   |
| 2 | 11 | 0.74   | 12.37  | 2.90   | 2.31   | 0.47   |
| 2 | 12 | 10.58  | 18.63  | 2.43   | 2.62   | 1.86   |
| 2 | 13 | 22.95  | 2.22   | 6.54   | 2.11   | 23.29  |
| 2 | 14 | 0.86   | 17.74  | 2.97   | 1.00   | 70.59  |
| 2 | 15 | 4.41   | 2.32   | 1.55   | 1.64   | 0.55   |
| 2 | 16 | 54.08  | 3.71   | 8.09   | 1.78   | 14.75  |
| 2 | 17 | 19.50  | 3.98   | 3.77   | 1.17   | 28.03  |
| 2 | 18 | 84.05  | 4.80   | 6.97   | 0.36   | 0.54   |
| 2 | 19 | 4.33   | 3.48   | 5.78   | 0.27   | 1.60   |
| 2 | 20 | 0.46   | 2.04   | 1.57   | 0.90   | 0.54   |
| 2 | 21 | 0.39   | 9.82   | 11.00  | 0.73   | 1.11   |
| 2 | 22 | 1.35   | 45.43  | 4.33   | 0.45   | 6.89   |
| 2 | 23 | 1.38   | 161.39 | 0.38   | 0.50   | 89.34  |
| 2 | 24 | 2.11   | 26.02  | 2.06   | 0.41   | 5.40   |
| 2 | 25 | 2.91   | 4.81   | 13.30  | 0.48   | 1.25   |
| 2 | 26 | 6.14   | 2.89   | 74.94  | 0.60   | 1.11   |
| 2 | 27 | 4.14   | 1.68   | 5.71   | 1.04   | 0.86   |
| 2 | 28 | 2.50   | 4.49   | 5.04   | 0.47   | 6.64   |
| 2 | 29 | 5.92   | 76.66  | 6.42   | 0.24   | 5.44   |
| 2 | 30 | 83.10  | 62.57  | 13.96  | 2.14   | 130.51 |
| 3 | 0  | 7.78   | 12.71  | 6.12   | 14.51  | 2.88   |
| 3 | 1  | 613.13 | 629.64 | 593.55 | 98.31  | 666.87 |
| 3 | 2  | 428.48 | 16.96  | 496.18 | 233.04 | 442.85 |



|   |    |        |        |        |        |        |
|---|----|--------|--------|--------|--------|--------|
| 3 | 3  | 47.46  | 514.88 | 42.30  | 210.29 | 0.28   |
| 3 | 4  | 28.86  | 28.29  | 11.30  | 34.80  | 7.29   |
| 3 | 5  | 68.15  | 17.27  | 49.42  | 53.39  | 23.67  |
| 3 | 6  | 25.47  | 78.65  | 11.67  | 15.63  | 28.84  |
| 3 | 7  | 67.19  | 7.82   | 38.69  | 4.87   | 6.81   |
| 3 | 8  | 85.95  | 11.21  | 45.89  | 50.57  | 2.09   |
| 3 | 9  | 72.34  | 2.91   | 41.91  | 25.29  | 25.18  |
| 3 | 10 | 69.97  | 4.33   | 31.94  | 58.63  | 0.66   |
| 3 | 11 | 2.90   | 14.00  | 5.66   | 28.14  | 1.46   |
| 3 | 12 | 10.36  | 9.65   | 2.49   | 50.32  | 2.25   |
| 3 | 13 | 24.92  | 1.60   | 5.09   | 20.19  | 33.12  |
| 3 | 14 | 0.87   | 7.76   | 9.15   | 31.41  | 107.19 |
| 3 | 15 | 3.75   | 2.42   | 2.77   | 35.85  | 1.86   |
| 3 | 16 | 50.74  | 2.36   | 41.93  | 30.26  | 24.07  |
| 3 | 17 | 17.80  | 6.17   | 2.91   | 25.68  | 57.08  |
| 3 | 18 | 86.08  | 2.22   | 13.30  | 7.39   | 0.76   |
| 3 | 19 | 1.79   | 6.03   | 36.12  | 1.66   | 1.16   |
| 3 | 20 | 4.66   | 1.28   | 15.11  | 6.66   | 1.06   |
| 3 | 21 | 1.96   | 2.92   | 137.46 | 2.15   | 0.41   |
| 3 | 32 | 0.80   | 19.62  | 23.50  | 3.74   | 6.01   |
| 3 | 23 | 8.07   | 64.30  | 6.11   | 6.09   | 29.52  |
| 3 | 24 | 2.47   | 12.24  | 3.59   | 4.73   | 1.84   |
| 3 | 25 | 2.25   | 7.86   | 6.10   | 3.75   | 0.89   |
| 3 | 26 | 3.73   | 4.41   | 61.01  | 3.99   | 0.56   |
| 3 | 27 | 4.08   | 2.23   | 2.27   | 8.00   | 0.71   |
| 3 | 28 | 1.37   | 6.71   | 2.17   | 3.25   | 7.11   |
| 3 | 29 | 3.93   | 81.60  | 4.90   | 3.75   | 6.47   |
| 3 | 30 | 43.38  | 66.81  | 9.02   | 14.62  | 134.22 |
| 4 | 0  | 5.82   | 5.35   | 9.61   | 21.56  | 10.68  |
| 4 | 1  | 218.07 | 174.67 | 196.90 | 110.72 | 26.99  |
| 4 | 2  | 159.71 | 41.47  | 148.25 | 552.03 | 16.22  |
| 4 | 3  | 120.38 | 139.75 | 69.84  | 587.89 | 7.83   |
| 4 | 4  | 9.56   | 26.56  | 39.19  | 156.25 | 5.99   |
| 4 | 5  | 356.95 | 12.42  | 297.18 | 20.70  | 649.76 |
| 4 | 6  | 20.62  | 27.01  | 52.74  | 17.48  | 647.95 |
| 4 | 7  | 126.01 | 8.42   | 281.57 | 6.87   | 167.75 |
| 4 | 8  | 296.67 | 6.88   | 59.57  | 25.08  | 16.51  |
| 4 | 9  | 106.32 | 1.48   | 89.31  | 51.53  | 5.10   |
| 4 | 10 | 20.17  | 1.58   | 7.57   | 17.76  | 26.78  |
| 4 | 11 | 1.73   | 5.66   | 14.30  | 26.41  | 32.14  |
| 4 | 12 | 12.79  | 2.72   | 0.97   | 15.18  | 2.36   |
| 4 | 13 | 5.94   | 0.53   | 1.19   | 38.23  | 4.66   |
| 4 | 14 | 1.70   | 2.93   | 3.60   | 16.74  | 12.61  |
| 4 | 15 | 2.28   | 0.61   | 2.57   | 39.88  | 1.25   |

|   |    |        |       |        |        |        |
|---|----|--------|-------|--------|--------|--------|
| 4 | 16 | 14.60  | 0.91  | 9.41   | 7.16   | 0.82   |
| 4 | 17 | 3.19   | 1.92  | 1.26   | 50.31  | 13.22  |
| 4 | 18 | 19.10  | 1.54  | 2.98   | 77.00  | 1.80   |
| 4 | 19 | 1.66   | 2.30  | 9.58   | 6.42   | 2.16   |
| 4 | 20 | 7.81   | 1.34  | 3.90   | 34.89  | 0.91   |
| 4 | 21 | 3.03   | 0.89  | 47.31  | 0.34   | 3.85   |
| 4 | 42 | 3.27   | 6.62  | 11.38  | 18.37  | 141.04 |
| 4 | 23 | 23.73  | 21.64 | 2.56   | 15.06  | 9.49   |
| 4 | 24 | 1.47   | 3.99  | 6.97   | 27.45  | 2.24   |
| 4 | 25 | 1.05   | 2.53  | 6.27   | 19.16  | 10.40  |
| 4 | 26 | 2.42   | 1.04  | 22.08  | 6.78   | 1.39   |
| 4 | 27 | 2.11   | 0.54  | 4.91   | 3.71   | 2.84   |
| 4 | 28 | 3.24   | 1.96  | 2.85   | 12.09  | 5.23   |
| 4 | 29 | 6.56   | 21.51 | 6.80   | 18.59  | 7.75   |
| 4 | 30 | 17.40  | 17.34 | 14.35  | 88.05  | 6.55   |
| 5 | 0  | 6.81   | 5.36  | 12.85  | 53.51  | 5.90   |
| 5 | 1  | 69.00  | 89.51 | 60.30  | 585.51 | 5.23   |
| 5 | 2  | 66.11  | 77.77 | 59.11  | 105.23 | 3.82   |
| 5 | 3  | 60.89  | 34.82 | 27.93  | 431.42 | 19.12  |
| 5 | 4  | 41.81  | 30.28 | 18.99  | 93.81  | 501.54 |
| 5 | 5  | 504.22 | 15.70 | 577.14 | 23.65  | 30.21  |
| 5 | 6  | 167.05 | 9.03  | 192.33 | 51.25  | 330.31 |
| 5 | 7  | 177.77 | 27.24 | 525.97 | 39.86  | 97.04  |
| 5 | 8  | 396.12 | 49.26 | 109.47 | 54.83  | 146.42 |
| 5 | 9  | 176.19 | 31.41 | 25.13  | 17.00  | 1.90   |
| 5 | 10 | 5.80   | 36.31 | 5.96   | 34.93  | 127.06 |
| 5 | 11 | 1.37   | 2.05  | 31.39  | 10.92  | 11.69  |
| 5 | 12 | 10.59  | 2.37  | 1.61   | 11.34  | 1.05   |
| 5 | 13 | 2.24   | 4.95  | 5.64   | 23.36  | 1.19   |
| 5 | 14 | 1.59   | 0.83  | 2.35   | 37.06  | 6.24   |
| 5 | 15 | 2.09   | 1.10  | 3.83   | 68.32  | 1.00   |
| 5 | 16 | 3.44   | 4.24  | 9.30   | 36.49  | 1.25   |
| 5 | 17 | 6.33   | 0.30  | 2.51   | 65.14  | 6.88   |
| 5 | 18 | 3.15   | 2.60  | 4.45   | 72.31  | 2.55   |
| 5 | 19 | 2.93   | 2.65  | 9.71   | 4.32   | 5.12   |
| 5 | 20 | 9.66   | 1.10  | 2.45   | 17.02  | 1.34   |
| 5 | 21 | 3.18   | 3.00  | 21.35  | 2.25   | 2.20   |
| 5 | 22 | 2.98   | 6.53  | 7.37   | 47.66  | 68.39  |
| 5 | 23 | 37.12  | 21.40 | 1.27   | 20.67  | 4.49   |
| 5 | 24 | 2.91   | 3.36  | 7.75   | 18.54  | 3.07   |
| 5 | 25 | 0.68   | 1.35  | 4.19   | 8.34   | 5.54   |
| 5 | 26 | 3.94   | 1.24  | 16.29  | 5.35   | 0.58   |
| 5 | 27 | 3.42   | 1.59  | 4.65   | 8.72   | 4.17   |
| 5 | 28 | 3.83   | 0.73  | 3.72   | 10.56  | 5.77   |

|   |    |        |        |       |        |        |
|---|----|--------|--------|-------|--------|--------|
| 5 | 29 | 2.55   | 7.67   | 10.25 | 12.89  | 2.44   |
| 5 | 30 | 8.74   | 6.22   | 26.19 | 90.17  | 3.92   |
| 6 | 0  | 11.70  | 15.47  | 1.16  | 67.22  | 2.57   |
| 6 | 1  | 36.52  | 556.39 | 4.86  | 571.88 | 6.62   |
| 6 | 2  | 26.48  | 528.31 | 3.69  | 454.79 | 2.80   |
| 6 | 3  | 15.93  | 6.18   | 0.73  | 81.94  | 14.75  |
| 6 | 4  | 620.05 | 8.69   | 11.52 | 116.52 | 410.73 |
| 6 | 5  | 22.08  | 17.25  | 25.48 | 28.68  | 24.00  |
| 6 | 6  | 110.30 | 58.30  | 16.87 | 77.77  | 274.22 |
| 6 | 7  | 123.52 | 18.73  | 21.36 | 59.97  | 67.49  |
| 6 | 8  | 575.40 | 8.13   | 33.47 | 39.13  | 71.86  |
| 6 | 9  | 37.37  | 9.81   | 30.12 | 38.62  | 2.60   |
| 6 | 10 | 16.28  | 8.17   | 3.44  | 29.19  | 71.08  |
| 6 | 11 | 8.97   | 5.59   | 1.95  | 22.86  | 6.54   |
| 6 | 12 | 97.74  | 12.68  | 0.10  | 31.64  | 0.59   |
| 6 | 13 | 18.46  | 1.44   | 1.75  | 25.25  | 2.26   |
| 6 | 14 | 2.47   | 3.74   | 0.75  | 34.13  | 3.31   |
| 6 | 15 | 13.79  | 1.28   | 0.15  | 82.68  | 0.70   |
| 6 | 16 | 21.28  | 1.42   | 2.24  | 29.47  | 0.73   |
| 6 | 17 | 12.45  | 3.11   | 0.13  | 95.66  | 5.18   |
| 6 | 18 | 6.75   | 3.77   | 0.90  | 88.57  | 1.69   |
| 6 | 19 | 5.83   | 4.08   | 1.09  | 6.15   | 0.92   |
| 6 | 20 | 44.07  | 1.00   | 0.24  | 24.71  | 1.46   |
| 6 | 21 | 9.79   | 4.71   | 1.62  | 4.88   | 1.45   |
| 6 | 22 | 5.38   | 38.23  | 0.54  | 73.45  | 45.08  |
| 6 | 23 | 101.36 | 125.13 | 0.88  | 32.09  | 2.28   |
| 6 | 24 | 4.57   | 20.74  | 0.58  | 22.52  | 1.03   |
| 6 | 25 | 2.21   | 1.97   | 0.58  | 28.45  | 3.31   |
| 6 | 26 | 9.43   | 2.30   | 1.98  | 9.61   | 0.24   |
| 6 | 27 | 2.42   | 1.82   | 0.27  | 5.41   | 1.30   |
| 6 | 28 | 6.52   | 4.50   | 0.12  | 6.60   | 1.31   |
| 6 | 29 | 14.20  | 65.07  | 0.41  | 13.37  | 1.74   |
| 6 | 30 | 6.33   | 54.21  | 0.84  | 89.55  | 1.69   |
| 7 | 0  | 1.28   | 43.76  | 3.91  | 220.40 | 1.65   |
| 7 | 1  | 8.51   | 21.89  | 6.07  | 192.79 | 4.79   |
| 7 | 2  | 3.68   | 25.98  | 6.57  | 136.62 | 2.11   |
| 7 | 3  | 6.37   | 9.48   | 0.95  | 94.92  | 2.33   |
| 7 | 4  | 48.98  | 8.92   | 80.16 | 46.15  | 12.43  |
| 7 | 5  | 6.50   | 648.41 | 90.65 | 43.98  | 7.92   |
| 7 | 6  | 12.16  | 140.19 | 23.64 | 157.40 | 5.44   |
| 7 | 7  | 13.58  | 511.88 | 74.19 | 130.69 | 1.89   |
| 7 | 8  | 40.69  | 237.72 | 14.52 | 85.55  | 4.48   |
| 7 | 9  | 17.41  | 53.65  | 15.81 | 105.59 | 1.30   |
| 7 | 10 | 4.71   | 34.12  | 0.94  | 115.97 | 3.91   |

|   |    |       |        |        |        |        |
|---|----|-------|--------|--------|--------|--------|
| 7 | 11 | 0.79  | 118.12 | 6.34   | 69.59  | 1.07   |
| 7 | 12 | 8.09  | 6.08   | 0.37   | 92.24  | 0.09   |
| 7 | 13 | 1.63  | 7.52   | 1.53   | 100.75 | 0.57   |
| 7 | 14 | 0.13  | 6.91   | 1.01   | 139.33 | 1.28   |
| 7 | 15 | 0.85  | 3.16   | 0.58   | 344.10 | 0.05   |
| 7 | 16 | 0.32  | 33.25  | 0.81   | 94.83  | 1.04   |
| 7 | 17 | 2.23  | 14.58  | 0.33   | 423.55 | 4.04   |
| 7 | 18 | 0.94  | 15.32  | 2.07   | 448.21 | 0.08   |
| 7 | 19 | 0.44  | 10.92  | 2.82   | 26.10  | 0.17   |
| 7 | 20 | 3.48  | 16.54  | 0.73   | 79.72  | 0.03   |
| 7 | 21 | 0.74  | 23.37  | 2.96   | 11.29  | 0.09   |
| 7 | 22 | 0.30  | 20.38  | 1.00   | 204.60 | 2.52   |
| 7 | 23 | 8.02  | 6.57   | 1.70   | 96.54  | 0.44   |
| 7 | 24 | 0.35  | 14.30  | 1.35   | 59.89  | 0.13   |
| 7 | 25 | 0.25  | 11.30  | 1.12   | 52.40  | 1.47   |
| 7 | 26 | 0.44  | 4.90   | 0.73   | 31.98  | 0.07   |
| 7 | 27 | 0.14  | 6.08   | 0.83   | 8.30   | 0.16   |
| 7 | 28 | 1.15  | 3.40   | 0.85   | 61.33  | 0.26   |
| 7 | 29 | 0.42  | 14.99  | 1.69   | 34.00  | 0.29   |
| 7 | 30 | 1.67  | 8.40   | 4.28   | 49.69  | 0.99   |
| 8 | 0  | 1.51  | 16.20  | 25.36  | 202.97 | 15.19  |
| 8 | 1  | 8.23  | 32.47  | 32.60  | 55.61  | 1.20   |
| 8 | 2  | 6.50  | 19.63  | 15.84  | 42.11  | 1.41   |
| 8 | 3  | 5.92  | 24.43  | 42.18  | 13.31  | 3.58   |
| 8 | 4  | 38.52 | 654.12 | 646.97 | 11.16  | 83.80  |
| 8 | 5  | 25.10 | 11.61  | 10.82  | 107.24 | 31.12  |
| 8 | 6  | 12.23 | 86.19  | 167.30 | 191.29 | 56.07  |
| 8 | 7  | 41.08 | 482.80 | 471.15 | 150.85 | 38.65  |
| 8 | 8  | 37.66 | 188.95 | 75.84  | 155.05 | 605.07 |
| 8 | 9  | 40.56 | 29.05  | 102.22 | 113.16 | 9.21   |
| 8 | 10 | 2.11  | 38.61  | 11.29  | 199.31 | 588.18 |
| 8 | 11 | 0.73  | 83.00  | 33.64  | 153.57 | 3.00   |
| 8 | 12 | 7.20  | 2.46   | 4.87   | 237.03 | 6.64   |
| 8 | 13 | 2.18  | 8.31   | 6.47   | 86.69  | 12.21  |
| 8 | 14 | 0.51  | 3.68   | 2.53   | 88.90  | 4.82   |
| 8 | 15 | 1.30  | 2.76   | 2.27   | 166.62 | 4.72   |
| 8 | 16 | 4.50  | 4.57   | 3.05   | 166.46 | 7.77   |
| 8 | 17 | 1.59  | 9.04   | 4.19   | 153.16 | 2.64   |
| 8 | 18 | 1.65  | 9.09   | 12.06  | 148.97 | 7.83   |
| 8 | 19 | 0.73  | 6.59   | 11.39  | 12.66  | 11.79  |
| 8 | 20 | 3.66  | 3.74   | 4.24   | 303.08 | 3.11   |
| 8 | 21 | 0.91  | 3.44   | 3.93   | 35.61  | 10.95  |
| 8 | 22 | 0.57  | 6.31   | 10.31  | 261.51 | 9.10   |
| 8 | 23 | 6.60  | 3.06   | 0.82   | 61.28  | 0.88   |

|    |    |        |        |        |        |        |
|----|----|--------|--------|--------|--------|--------|
| 8  | 24 | 0.29   | 8.67   | 2.43   | 228.86 | 5.12   |
| 8  | 25 | 0.64   | 8.26   | 6.34   | 201.09 | 1.52   |
| 8  | 26 | 1.37   | 3.62   | 10.95  | 27.01  | 2.35   |
| 8  | 27 | 0.24   | 1.66   | 8.62   | 22.33  | 14.06  |
| 8  | 28 | 1.24   | 2.70   | 3.74   | 8.30   | 15.95  |
| 8  | 29 | 2.81   | 13.11  | 3.96   | 69.64  | 5.34   |
| 8  | 30 | 1.60   | 11.05  | 1.50   | 17.77  | 4.36   |
| 9  | 0  | 9.35   | 118.57 | 25.76  | 248.86 | 6.69   |
| 9  | 1  | 30.14  | 14.16  | 10.25  | 42.43  | 10.76  |
| 9  | 2  | 29.39  | 19.45  | 35.67  | 34.88  | 6.38   |
| 9  | 3  | 28.14  | 7.90   | 10.95  | 12.71  | 29.09  |
| 9  | 4  | 131.45 | 292.62 | 164.57 | 10.45  | 664.90 |
| 9  | 5  | 77.99  | 272.28 | 137.12 | 84.72  | 439.43 |
| 9  | 6  | 12.94  | 44.88  | 7.42   | 145.19 | 16.86  |
| 9  | 7  | 590.18 | 54.92  | 66.23  | 98.26  | 53.43  |
| 9  | 8  | 100.28 | 45.97  | 613.91 | 66.17  | 41.81  |
| 9  | 9  | 592.82 | 492.85 | 596.44 | 53.17  | 2.53   |
| 9  | 10 | 13.25  | 428.37 | 26.08  | 71.96  | 34.84  |
| 9  | 11 | 4.04   | 43.52  | 14.06  | 49.02  | 25.00  |
| 9  | 12 | 13.91  | 19.12  | 3.70   | 157.59 | 0.43   |
| 9  | 13 | 2.65   | 67.38  | 2.49   | 13.30  | 3.96   |
| 9  | 14 | 6.84   | 16.23  | 6.13   | 134.22 | 12.32  |
| 9  | 15 | 7.23   | 27.33  | 5.73   | 68.42  | 0.64   |
| 9  | 16 | 52.09  | 215.44 | 33.97  | 141.90 | 1.17   |
| 9  | 17 | 37.27  | 86.26  | 1.51   | 105.13 | 10.94  |
| 9  | 18 | 23.81  | 38.95  | 17.17  | 294.30 | 2.45   |
| 9  | 19 | 7.23   | 77.39  | 13.07  | 12.58  | 2.32   |
| 9  | 20 | 5.45   | 45.23  | 4.71   | 323.60 | 1.79   |
| 9  | 21 | 7.46   | 105.65 | 26.08  | 20.64  | 2.46   |
| 9  | 22 | 9.82   | 69.44  | 13.90  | 281.84 | 121.05 |
| 9  | 23 | 16.62  | 20.79  | 1.00   | 98.73  | 6.71   |
| 9  | 24 | 3.24   | 27.86  | 14.48  | 154.32 | 3.08   |
| 9  | 25 | 2.80   | 26.90  | 11.66  | 415.29 | 11.88  |
| 9  | 26 | 10.48  | 21.97  | 15.73  | 38.81  | 0.71   |
| 9  | 27 | 1.85   | 26.44  | 8.14   | 18.80  | 1.01   |
| 9  | 28 | 9.30   | 12.90  | 5.77   | 77.10  | 6.75   |
| 9  | 29 | 28.61  | 13.15  | 14.61  | 18.87  | 7.52   |
| 9  | 30 | 14.88  | 13.93  | 16.60  | 17.59  | 2.07   |
| 10 | 0  | 24.52  | 30.93  | 13.03  | 165.72 | 4.56   |
| 10 | 1  | 30.63  | 111.26 | 18.66  | 89.73  | 35.22  |
| 10 | 2  | 27.30  | 75.88  | 25.06  | 84.83  | 12.65  |
| 10 | 3  | 28.77  | 57.08  | 21.51  | 82.50  | 23.44  |
| 10 | 4  | 110.94 | 69.49  | 605.94 | 2.98   | 47.23  |
| 10 | 5  | 160.25 | 20.86  | 478.56 | 71.61  | 12.54  |

|    |    |        |        |        |        |        |
|----|----|--------|--------|--------|--------|--------|
| 10 | 6  | 610.47 | 9.98   | 73.45  | 35.32  | 47.53  |
| 10 | 7  | 20.30  | 43.89  | 11.85  | 35.23  | 196.12 |
| 10 | 8  | 84.19  | 22.58  | 176.67 | 55.92  | 65.67  |
| 10 | 9  | 457.75 | 147.30 | 176.86 | 42.06  | 1.15   |
| 10 | 10 | 23.81  | 123.84 | 10.84  | 24.61  | 187.71 |
| 10 | 11 | 3.34   | 9.79   | 26.54  | 29.49  | 1.93   |
| 10 | 12 | 17.59  | 6.27   | 2.38   | 92.83  | 2.62   |
| 10 | 13 | 4.62   | 18.12  | 4.51   | 47.07  | 7.91   |
| 10 | 14 | 4.21   | 7.56   | 4.48   | 149.87 | 4.94   |
| 10 | 15 | 7.52   | 7.63   | 3.40   | 52.57  | 1.94   |
| 10 | 16 | 58.67  | 69.06  | 10.70  | 30.62  | 2.62   |
| 10 | 17 | 42.16  | 30.06  | 2.66   | 86.47  | 1.94   |
| 10 | 18 | 26.53  | 12.85  | 8.99   | 62.61  | 6.88   |
| 10 | 19 | 8.99   | 24.35  | 14.20  | 12.13  | 1.09   |
| 10 | 20 | 6.72   | 13.31  | 3.22   | 262.60 | 2.77   |
| 10 | 21 | 6.28   | 32.96  | 14.59  | 7.11   | 1.67   |
| 10 | 22 | 5.60   | 22.73  | 7.74   | 126.27 | 7.15   |
| 10 | 23 | 19.46  | 15.51  | 1.90   | 32.63  | 4.76   |
| 10 | 24 | 2.40   | 10.88  | 7.68   | 244.48 | 0.21   |
| 10 | 25 | 3.67   | 8.88   | 1.94   | 171.45 | 2.46   |
| 10 | 26 | 21.45  | 7.88   | 4.54   | 16.58  | 2.02   |
| 10 | 27 | 9.49   | 8.22   | 3.84   | 10.58  | 3.56   |
| 10 | 28 | 11.05  | 5.14   | 6.32   | 24.33  | 6.00   |
| 10 | 29 | 30.76  | 19.90  | 11.41  | 48.22  | 2.68   |
| 10 | 30 | 13.60  | 19.28  | 25.77  | 6.27   | 5.76   |
| 11 | 0  | 13.91  | 72.18  | 26.24  | 257.70 | 11.62  |
| 11 | 1  | 13.67  | 15.79  | 42.56  | 29.08  | 12.84  |
| 11 | 2  | 8.65   | 9.11   | 20.58  | 17.15  | 7.32   |
| 11 | 3  | 37.23  | 14.90  | 45.96  | 21.11  | 9.39   |
| 11 | 4  | 509.32 | 494.90 | 105.91 | 13.45  | 42.61  |
| 11 | 5  | 569.01 | 444.47 | 76.95  | 115.46 | 71.02  |
| 11 | 6  | 113.61 | 71.16  | 609.24 | 416.84 | 141.17 |
| 11 | 7  | 88.73  | 21.06  | 208.62 | 351.67 | 575.18 |
| 11 | 8  | 1.21   | 17.61  | 6.85   | 32.00  | 45.49  |
| 11 | 9  | 64.46  | 311.90 | 496.74 | 40.09  | 9.07   |
| 11 | 10 | 10.31  | 246.05 | 19.87  | 20.06  | 477.49 |
| 11 | 11 | 10.52  | 50.60  | 11.14  | 64.11  | 1.66   |
| 11 | 12 | 61.28  | 11.41  | 6.86   | 243.91 | 6.88   |
| 11 | 13 | 12.39  | 26.70  | 0.57   | 118.02 | 16.90  |
| 11 | 14 | 2.65   | 11.05  | 4.30   | 198.10 | 5.92   |
| 11 | 15 | 9.24   | 14.25  | 2.84   | 268.34 | 4.68   |
| 11 | 16 | 18.33  | 156.91 | 36.21  | 93.15  | 9.94   |
| 11 | 17 | 14.97  | 74.74  | 7.71   | 315.81 | 1.66   |
| 11 | 18 | 5.38   | 29.79  | 16.34  | 150.78 | 19.33  |

|    |    |        |        |        |        |       |
|----|----|--------|--------|--------|--------|-------|
| 11 | 19 | 3.40   | 59.29  | 6.29   | 37.15  | 3.24  |
| 11 | 20 | 34.28  | 27.71  | 8.15   | 123.32 | 5.72  |
| 11 | 21 | 7.51   | 72.78  | 4.42   | 4.05   | 4.85  |
| 11 | 22 | 1.98   | 51.61  | 14.32  | 222.37 | 10.11 |
| 11 | 23 | 79.47  | 14.62  | 0.25   | 90.69  | 1.82  |
| 11 | 24 | 3.89   | 20.50  | 3.24   | 155.39 | 0.66  |
| 11 | 25 | 0.85   | 23.50  | 7.39   | 112.60 | 3.33  |
| 11 | 26 | 3.16   | 19.93  | 15.04  | 21.33  | 2.09  |
| 11 | 27 | 5.11   | 15.41  | 12.76  | 13.27  | 8.65  |
| 11 | 28 | 5.74   | 11.08  | 10.21  | 73.80  | 15.98 |
| 11 | 29 | 12.90  | 14.02  | 8.16   | 26.81  | 7.25  |
| 11 | 30 | 2.61   | 6.76   | 8.23   | 3.99   | 9.17  |
| 12 | 0  | 13.41  | 27.10  | 11.41  | 56.49  | 5.92  |
| 12 | 1  | 18.48  | 13.84  | 23.42  | 21.84  | 20.56 |
| 12 | 2  | 11.88  | 3.79   | 41.51  | 17.45  | 6.90  |
| 12 | 3  | 38.41  | 12.16  | 22.73  | 9.00   | 17.01 |
| 12 | 4  | 86.93  | 20.01  | 26.23  | 25.01  | 19.45 |
| 12 | 5  | 68.16  | 20.76  | 79.92  | 188.46 | 10.67 |
| 12 | 6  | 628.80 | 47.28  | 594.67 | 124.80 | 27.98 |
| 12 | 7  | 458.86 | 229.14 | 201.40 | 62.21  | 76.28 |
| 12 | 8  | 58.12  | 602.41 | 502.40 | 346.58 | 63.69 |
| 12 | 9  | 9.29   | 52.95  | 7.08   | 279.90 | 1.12  |
| 12 | 10 | 18.75  | 502.15 | 14.99  | 185.98 | 2.45  |
| 12 | 11 | 12.51  | 23.74  | 3.48   | 225.81 | 1.57  |
| 12 | 12 | 10.87  | 20.42  | 9.91   | 352.88 | 1.13  |
| 12 | 13 | 4.22   | 15.63  | 0.47   | 201.97 | 1.18  |
| 12 | 14 | 2.65   | 9.20   | 8.31   | 261.69 | 4.06  |
| 12 | 15 | 11.03  | 17.23  | 9.26   | 239.37 | 0.50  |
| 12 | 16 | 53.77  | 136.14 | 45.69  | 8.84   | 3.14  |
| 12 | 17 | 37.51  | 104.70 | 6.45   | 211.49 | 3.85  |
| 12 | 18 | 19.86  | 54.47  | 17.02  | 165.01 | 2.01  |
| 12 | 19 | 7.89   | 99.88  | 16.81  | 134.86 | 1.16  |
| 12 | 20 | 4.04   | 31.38  | 3.67   | 120.65 | 0.70  |
| 12 | 21 | 4.96   | 64.81  | 22.13  | 75.30  | 1.01  |
| 12 | 22 | 6.07   | 39.44  | 9.18   | 52.38  | 1.98  |
| 12 | 23 | 10.07  | 12.11  | 0.19   | 11.32  | 4.57  |
| 12 | 24 | 1.33   | 12.83  | 13.78  | 71.41  | 0.49  |
| 12 | 25 | 3.67   | 32.11  | 8.05   | 39.13  | 1.39  |
| 12 | 26 | 12.43  | 39.43  | 3.58   | 21.06  | 0.79  |
| 12 | 27 | 9.55   | 21.04  | 7.80   | 20.62  | 0.63  |
| 12 | 28 | 13.23  | 8.23   | 9.54   | 26.87  | 2.36  |
| 12 | 29 | 36.54  | 8.23   | 13.68  | 29.70  | 0.37  |
| 12 | 30 | 6.88   | 9.57   | 20.35  | 1.99   | 5.27  |
| 13 | 0  | 253.06 | 203.19 | 240.76 | 57.27  | 21.90 |

|    |    |        |        |        |        |        |
|----|----|--------|--------|--------|--------|--------|
| 13 | 1  | 6.80   | 3.88   | 3.79   | 10.77  | 2.53   |
| 13 | 2  | 11.83  | 4.20   | 6.81   | 13.91  | 2.75   |
| 13 | 3  | 11.43  | 3.26   | 8.01   | 13.30  | 2.03   |
| 13 | 4  | 6.30   | 15.44  | 3.00   | 11.78  | 16.68  |
| 13 | 5  | 5.48   | 27.80  | 3.98   | 49.23  | 52.26  |
| 13 | 6  | 18.03  | 23.15  | 4.45   | 66.65  | 146.11 |
| 13 | 7  | 7.58   | 98.56  | 6.23   | 25.68  | 602.92 |
| 13 | 8  | 9.29   | 195.67 | 9.54   | 35.08  | 489.40 |
| 13 | 9  | 16.97  | 330.33 | 16.72  | 29.14  | 3.37   |
| 13 | 10 | 2.22   | 308.76 | 0.67   | 226.71 | 12.01  |
| 13 | 11 | 251.29 | 16.22  | 7.24   | 377.74 | 2.60   |
| 13 | 12 | 26.17  | 10.83  | 203.70 | 164.49 | 8.49   |
| 13 | 13 | 4.20   | 240.21 | 1.60   | 44.18  | 15.38  |
| 13 | 14 | 105.47 | 19.88  | 12.57  | 169.84 | 5.23   |
| 13 | 15 | 595.16 | 77.29  | 144.25 | 299.99 | 3.91   |
| 13 | 16 | 35.19  | 507.68 | 39.79  | 304.93 | 8.02   |
| 13 | 17 | 19.16  | 182.00 | 508.48 | 270.31 | 1.88   |
| 13 | 18 | 25.89  | 67.12  | 338.53 | 145.25 | 15.86  |
| 13 | 19 | 145.45 | 158.42 | 108.89 | 146.96 | 7.05   |
| 13 | 20 | 40.75  | 37.10  | 332.77 | 176.07 | 6.03   |
| 13 | 21 | 232.60 | 237.29 | 46.32  | 50.03  | 6.86   |
| 13 | 22 | 323.02 | 162.25 | 152.89 | 46.71  | 11.14  |
| 13 | 23 | 5.81   | 47.43  | 2.42   | 52.95  | 0.71   |
| 13 | 24 | 14.43  | 66.14  | 176.08 | 122.36 | 2.98   |
| 13 | 25 | 58.06  | 76.50  | 223.26 | 68.59  | 3.26   |
| 13 | 26 | 329.99 | 49.36  | 17.67  | 34.47  | 2.31   |
| 13 | 27 | 30.50  | 32.09  | 65.99  | 40.02  | 4.55   |
| 13 | 28 | 10.62  | 34.84  | 111.91 | 10.70  | 17.62  |
| 13 | 29 | 5.37   | 18.33  | 167.83 | 29.11  | 1.29   |
| 13 | 30 | 3.26   | 20.69  | 27.15  | 3.48   | 5.95   |
| 14 | 0  | 31.17  | 181.15 | 14.30  | 95.67  | 261.19 |
| 14 | 1  | 59.60  | 2.05   | 21.27  | 28.60  | 1.01   |
| 14 | 2  | 50.87  | 2.79   | 19.44  | 24.78  | 0.69   |
| 14 | 3  | 51.28  | 3.77   | 17.73  | 21.08  | 0.26   |
| 14 | 4  | 7.86   | 11.62  | 19.97  | 34.20  | 3.24   |
| 14 | 5  | 55.25  | 17.92  | 25.33  | 441.82 | 2.87   |
| 14 | 6  | 45.95  | 18.74  | 47.70  | 59.39  | 4.56   |
| 14 | 7  | 72.15  | 96.45  | 28.41  | 64.17  | 21.31  |
| 14 | 8  | 38.23  | 219.38 | 48.00  | 57.51  | 11.60  |
| 14 | 9  | 63.48  | 213.52 | 31.93  | 39.19  | 0.45   |
| 14 | 10 | 1.50   | 65.24  | 1.39   | 122.91 | 16.21  |
| 14 | 11 | 36.01  | 4.18   | 1.66   | 186.20 | 0.82   |
| 14 | 12 | 4.78   | 6.90   | 11.44  | 229.94 | 223.41 |
| 14 | 13 | 3.59   | 136.46 | 3.84   | 110.09 | 28.85  |



|    |    |        |        |        |        |        |
|----|----|--------|--------|--------|--------|--------|
| 14 | 14 | 13.56  | 6.53   | 4.27   | 167.46 | 2.92   |
| 14 | 15 | 78.99  | 248.40 | 8.63   | 209.86 | 130.28 |
| 14 | 16 | 4.31   | 187.11 | 3.30   | 117.39 | 11.21  |
| 14 | 17 | 6.01   | 293.50 | 33.24  | 190.73 | 9.69   |
| 14 | 18 | 5.49   | 37.43  | 17.85  | 37.60  | 525.69 |
| 14 | 19 | 16.44  | 303.21 | 5.62   | 12.04  | 314.63 |
| 14 | 20 | 6.89   | 158.56 | 22.21  | 127.53 | 70.53  |
| 14 | 21 | 30.19  | 260.44 | 8.00   | 4.31   | 171.82 |
| 14 | 22 | 41.39  | 241.50 | 9.50   | 52.61  | 8.28   |
| 14 | 23 | 1.92   | 68.40  | 1.15   | 49.63  | 5.90   |
| 14 | 24 | 1.84   | 8.00   | 10.47  | 92.28  | 45.94  |
| 14 | 25 | 7.84   | 295.38 | 14.40  | 86.83  | 4.53   |
| 14 | 26 | 44.51  | 162.22 | 32.74  | 50.52  | 128.03 |
| 14 | 27 | 5.61   | 29.19  | 5.84   | 25.23  | 331.40 |
| 14 | 28 | 2.34   | 37.25  | 7.37   | 20.61  | 178.35 |
| 14 | 29 | 1.80   | 20.96  | 9.95   | 43.98  | 31.95  |
| 14 | 30 | 11.05  | 26.93  | 4.40   | 6.85   | 2.57   |
| 15 | 0  | 228.63 | 162.68 | 221.78 | 86.64  | 4.42   |
| 15 | 1  | 4.02   | 3.26   | 2.59   | 54.27  | 5.34   |
| 15 | 2  | 2.19   | 4.21   | 1.07   | 45.08  | 3.05   |
| 15 | 3  | 2.26   | 3.77   | 2.62   | 48.37  | 4.00   |
| 15 | 4  | 2.84   | 9.82   | 3.65   | 17.31  | 27.17  |
| 15 | 5  | 3.51   | 24.35  | 0.77   | 298.15 | 10.70  |
| 15 | 6  | 8.87   | 35.37  | 3.96   | 92.88  | 20.90  |
| 15 | 7  | 9.14   | 182.60 | 3.37   | 127.36 | 8.06   |
| 15 | 8  | 2.21   | 429.55 | 3.25   | 87.33  | 7.12   |
| 15 | 9  | 4.81   | 444.11 | 6.88   | 56.48  | 0.67   |
| 15 | 10 | 2.40   | 34.43  | 2.30   | 88.41  | 7.25   |
| 15 | 11 | 150.58 | 8.26   | 11.94  | 132.14 | 0.22   |
| 15 | 12 | 15.74  | 11.35  | 242.94 | 192.82 | 0.42   |
| 15 | 13 | 1.95   | 44.34  | 1.33   | 73.66  | 0.88   |
| 15 | 14 | 294.49 | 18.44  | 10.35  | 121.72 | 1.01   |
| 15 | 15 | 128.80 | 169.33 | 313.83 | 66.75  | 0.22   |
| 15 | 16 | 7.59   | 253.27 | 13.49  | 165.34 | 0.87   |
| 15 | 17 | 7.10   | 26.47  | 140.01 | 29.81  | 0.76   |
| 15 | 18 | 3.64   | 36.41  | 128.47 | 74.60  | 0.26   |
| 15 | 19 | 102.59 | 67.14  | 45.31  | 77.67  | 0.17   |
| 15 | 20 | 73.70  | 93.97  | 378.63 | 166.19 | 0.37   |
| 15 | 21 | 513.80 | 259.01 | 36.42  | 21.66  | 0.95   |
| 15 | 22 | 287.42 | 250.13 | 224.59 | 62.58  | 3.56   |
| 15 | 23 | 8.74   | 66.40  | 9.80   | 21.28  | 0.97   |
| 15 | 24 | 39.42  | 53.25  | 269.68 | 126.81 | 0.43   |
| 15 | 25 | 89.51  | 160.36 | 327.92 | 92.43  | 1.60   |
| 15 | 26 | 227.35 | 73.52  | 40.64  | 8.15   | 0.24   |

|    |    |        |        |        |        |        |
|----|----|--------|--------|--------|--------|--------|
| 15 | 27 | 397.40 | 46.23  | 154.10 | 12.78  | 1.01   |
| 15 | 28 | 8.39   | 12.35  | 221.64 | 14.42  | 0.83   |
| 15 | 29 | 2.77   | 25.20  | 143.54 | 39.88  | 0.90   |
| 15 | 30 | 9.52   | 32.28  | 54.69  | 8.23   | 1.61   |
| 16 | 0  | 220.92 | 128.53 | 187.80 | 151.36 | 275.99 |
| 16 | 1  | 8.06   | 6.04   | 14.37  | 12.04  | 0.67   |
| 16 | 2  | 12.19  | 4.58   | 7.25   | 6.34   | 1.30   |
| 16 | 3  | 11.61  | 1.54   | 11.93  | 10.16  | 0.42   |
| 16 | 4  | 0.90   | 60.52  | 16.83  | 11.20  | 0.53   |
| 16 | 5  | 16.93  | 43.64  | 5.30   | 173.60 | 0.99   |
| 16 | 6  | 12.02  | 12.86  | 39.86  | 378.47 | 3.00   |
| 16 | 7  | 21.03  | 48.22  | 13.74  | 245.74 | 14.41  |
| 16 | 8  | 12.78  | 109.32 | 17.37  | 75.31  | 8.88   |
| 16 | 9  | 22.89  | 116.36 | 33.13  | 55.51  | 1.10   |
| 16 | 10 | 1.72   | 58.65  | 0.90   | 113.24 | 2.53   |
| 16 | 11 | 247.64 | 4.41   | 20.92  | 45.65  | 2.16   |
| 16 | 12 | 16.11  | 15.31  | 301.96 | 212.03 | 169.76 |
| 16 | 13 | 1.09   | 503.97 | 0.78   | 61.19  | 26.19  |
| 16 | 14 | 151.49 | 21.22  | 5.07   | 194.95 | 5.08   |
| 16 | 15 | 27.46  | 179.85 | 102.40 | 296.03 | 273.02 |
| 16 | 16 | 2.95   | 472.56 | 1.90   | 198.16 | 12.06  |
| 16 | 17 | 15.76  | 110.97 | 62.94  | 167.48 | 8.97   |
| 16 | 18 | 16.29  | 45.21  | 287.56 | 89.78  | 99.89  |
| 16 | 19 | 322.29 | 35.95  | 45.90  | 99.77  | 53.55  |
| 16 | 20 | 49.26  | 17.24  | 298.01 | 269.52 | 310.98 |
| 16 | 21 | 201.61 | 125.63 | 103.71 | 24.06  | 475.86 |
| 16 | 22 | 365.22 | 149.55 | 416.86 | 114.55 | 14.85  |
| 16 | 23 | 10.26  | 44.10  | 5.07   | 24.87  | 2.10   |
| 16 | 24 | 12.50  | 50.03  | 169.37 | 177.97 | 56.78  |
| 16 | 25 | 36.91  | 86.84  | 107.89 | 142.37 | 9.56   |
| 16 | 26 | 241.41 | 29.10  | 12.42  | 23.23  | 89.40  |
| 16 | 27 | 251.32 | 66.02  | 263.33 | 8.66   | 319.79 |
| 16 | 28 | 9.76   | 43.85  | 132.04 | 23.20  | 177.50 |
| 16 | 29 | 4.92   | 24.76  | 145.94 | 60.15  | 303.11 |
| 16 | 30 | 1.13   | 29.49  | 27.15  | 10.90  | 13.18  |
| 17 | 0  | 202.05 | 63.55  | 168.91 | 96.16  | 243.93 |
| 17 | 1  | 3.33   | 8.79   | 2.41   | 13.31  | 2.60   |
| 17 | 2  | 2.34   | 12.13  | 2.86   | 13.55  | 2.23   |
| 17 | 3  | 1.02   | 7.69   | 2.74   | 14.18  | 2.19   |
| 17 | 4  | 3.08   | 90.85  | 4.25   | 33.61  | 5.61   |
| 17 | 5  | 5.59   | 61.92  | 4.47   | 459.42 | 6.03   |
| 17 | 6  | 9.88   | 23.26  | 8.01   | 235.16 | 5.36   |
| 17 | 7  | 9.12   | 77.59  | 3.60   | 357.03 | 13.42  |
| 17 | 8  | 2.41   | 105.78 | 7.93   | 173.36 | 32.51  |

|    |    |        |        |        |        |        |
|----|----|--------|--------|--------|--------|--------|
| 17 | 9  | 3.91   | 113.97 | 4.12   | 138.35 | 0.45   |
| 17 | 10 | 1.02   | 16.23  | 2.30   | 151.67 | 22.61  |
| 17 | 11 | 610.22 | 2.71   | 29.25  | 13.72  | 0.44   |
| 17 | 12 | 54.34  | 7.24   | 534.72 | 97.40  | 120.11 |
| 17 | 13 | 4.78   | 267.24 | 1.42   | 66.56  | 18.08  |
| 17 | 14 | 255.39 | 11.17  | 10.55  | 66.04  | 2.19   |
| 17 | 15 | 517.67 | 101.85 | 320.66 | 95.93  | 83.63  |
| 17 | 16 | 33.74  | 241.15 | 39.14  | 82.47  | 14.19  |
| 17 | 17 | 6.35   | 78.64  | 476.86 | 168.34 | 6.06   |
| 17 | 18 | 17.13  | 33.43  | 266.65 | 268.76 | 96.34  |
| 17 | 19 | 131.40 | 30.28  | 100.56 | 56.07  | 244.57 |
| 17 | 20 | 33.56  | 7.84   | 113.41 | 92.54  | 96.53  |
| 17 | 21 | 84.65  | 61.76  | 35.35  | 29.99  | 149.34 |
| 17 | 22 | 162.85 | 70.15  | 173.84 | 175.62 | 2.65   |
| 17 | 23 | 0.90   | 17.45  | 6.16   | 66.98  | 5.19   |
| 17 | 24 | 25.53  | 17.11  | 181.24 | 74.18  | 148.14 |
| 17 | 25 | 41.21  | 44.28  | 138.88 | 123.42 | 1.91   |
| 17 | 26 | 201.19 | 32.80  | 16.46  | 42.82  | 28.66  |
| 17 | 27 | 91.27  | 36.19  | 47.84  | 23.52  | 318.38 |
| 17 | 28 | 4.41   | 27.27  | 79.52  | 32.10  | 201.55 |
| 17 | 29 | 3.47   | 11.02  | 98.38  | 39.97  | 184.43 |
| 17 | 30 | 2.96   | 16.96  | 20.81  | 12.25  | 14.87  |
| 18 | 0  | 5.46   | 178.08 | 4.16   | 166.79 | 225.64 |
| 18 | 1  | 22.31  | 13.63  | 1.37   | 10.05  | 0.42   |
| 18 | 2  | 20.65  | 6.36   | 0.65   | 7.91   | 0.23   |
| 18 | 3  | 26.78  | 9.48   | 1.39   | 16.82  | 0.49   |
| 18 | 4  | 4.17   | 19.80  | 31.11  | 19.16  | 0.97   |
| 18 | 5  | 22.64  | 7.04   | 30.64  | 204.43 | 0.97   |
| 18 | 6  | 2.17   | 5.40   | 23.50  | 370.61 | 0.66   |
| 18 | 7  | 3.59   | 34.52  | 21.73  | 200.54 | 4.52   |
| 18 | 8  | 14.88  | 84.21  | 22.34  | 172.30 | 3.60   |
| 18 | 9  | 2.60   | 35.04  | 11.73  | 141.30 | 0.55   |
| 18 | 10 | 3.57   | 68.92  | 1.27   | 90.74  | 2.04   |
| 18 | 11 | 1.53   | 6.20   | 0.87   | 37.48  | 2.43   |
| 18 | 12 | 0.36   | 11.65  | 3.70   | 170.15 | 548.74 |
| 18 | 13 | 0.29   | 257.69 | 0.42   | 76.32  | 72.90  |
| 18 | 14 | 0.73   | 10.28  | 0.82   | 217.92 | 6.48   |
| 18 | 15 | 0.13   | 182.86 | 3.72   | 128.74 | 378.05 |
| 18 | 16 | 2.22   | 37.88  | 1.17   | 241.52 | 11.00  |
| 18 | 17 | 1.85   | 382.72 | 1.35   | 226.34 | 6.01   |
| 18 | 18 | 3.17   | 159.69 | 0.57   | 173.77 | 480.39 |
| 18 | 19 | 0.97   | 329.96 | 2.78   | 39.27  | 265.09 |
| 18 | 20 | 0.37   | 69.04  | 4.08   | 245.84 | 121.91 |
| 18 | 21 | 0.88   | 167.01 | 0.87   | 35.16  | 101.30 |

|    |    |        |        |        |        |        |
|----|----|--------|--------|--------|--------|--------|
| 18 | 22 | 0.84   | 156.43 | 2.86   | 224.81 | 6.06   |
| 18 | 23 | 1.37   | 47.00  | 4.66   | 91.65  | 3.51   |
| 18 | 24 | 0.29   | 92.60  | 0.72   | 126.05 | 51.45  |
| 18 | 25 | 0.25   | 260.26 | 0.39   | 132.07 | 2.39   |
| 18 | 26 | 0.24   | 216.92 | 0.45   | 31.14  | 48.20  |
| 18 | 27 | 0.24   | 39.02  | 2.18   | 10.06  | 163.25 |
| 18 | 28 | 0.55   | 51.29  | 1.01   | 18.43  | 84.82  |
| 18 | 29 | 1.48   | 19.02  | 1.63   | 45.60  | 40.22  |
| 18 | 30 | 4.36   | 27.93  | 1.60   | 6.03   | 2.22   |
| 19 | 0  | 16.74  | 275.31 | 177.00 | 281.18 | 309.74 |
| 19 | 1  | 9.24   | 2.53   | 1.43   | 5.49   | 6.61   |
| 19 | 2  | 7.10   | 1.97   | 2.39   | 2.14   | 3.04   |
| 19 | 3  | 8.67   | 1.69   | 2.62   | 11.00  | 5.85   |
| 19 | 4  | 18.52  | 1.92   | 0.79   | 9.43   | 0.43   |
| 19 | 5  | 88.87  | 3.19   | 4.40   | 107.21 | 0.57   |
| 19 | 6  | 47.13  | 1.96   | 4.47   | 159.58 | 2.04   |
| 19 | 7  | 46.01  | 6.34   | 4.70   | 143.83 | 5.50   |
| 19 | 8  | 61.26  | 12.57  | 6.97   | 71.56  | 3.59   |
| 19 | 9  | 39.79  | 12.31  | 4.37   | 57.43  | 1.24   |
| 19 | 10 | 1.15   | 2.34   | 1.44   | 70.65  | 2.64   |
| 19 | 11 | 9.23   | 5.64   | 12.02  | 64.48  | 3.26   |
| 19 | 12 | 1.87   | 7.42   | 267.73 | 302.79 | 383.33 |
| 19 | 13 | 0.11   | 223.91 | 1.64   | 74.15  | 48.74  |
| 19 | 14 | 21.70  | 29.10  | 7.53   | 390.69 | 10.87  |
| 19 | 15 | 6.02   | 585.63 | 23.82  | 198.73 | 547.49 |
| 19 | 16 | 0.60   | 44.39  | 28.68  | 337.82 | 23.40  |
| 19 | 17 | 0.77   | 386.24 | 294.64 | 160.70 | 4.44   |
| 19 | 18 | 0.90   | 125.35 | 429.60 | 218.48 | 140.82 |
| 19 | 19 | 24.07  | 330.51 | 101.71 | 37.02  | 141.16 |
| 19 | 20 | 5.18   | 155.35 | 155.98 | 204.43 | 261.87 |
| 19 | 21 | 15.66  | 262.05 | 102.26 | 16.46  | 426.82 |
| 19 | 22 | 9.61   | 198.97 | 435.63 | 387.02 | 14.85  |
| 19 | 23 | 6.65   | 45.19  | 9.18   | 120.07 | 2.56   |
| 19 | 24 | 0.84   | 38.88  | 316.19 | 205.94 | 16.01  |
| 19 | 25 | 2.96   | 270.95 | 245.30 | 190.12 | 10.74  |
| 19 | 26 | 7.66   | 71.22  | 25.20  | 28.93  | 79.41  |
| 19 | 27 | 16.39  | 13.80  | 232.26 | 10.55  | 116.81 |
| 19 | 28 | 5.03   | 42.38  | 155.61 | 69.56  | 147.07 |
| 19 | 29 | 3.12   | 12.00  | 60.43  | 13.63  | 221.00 |
| 19 | 30 | 1.29   | 17.00  | 39.07  | 5.72   | 10.82  |
| 20 | 0  | 280.72 | 250.79 | 323.17 | 106.76 | 13.92  |
| 20 | 1  | 2.05   | 0.64   | 1.35   | 10.13  | 147.24 |
| 20 | 2  | 5.97   | 6.86   | 2.48   | 17.61  | 78.78  |
| 20 | 3  | 2.53   | 0.53   | 1.33   | 9.53   | 124.94 |

|    |    |        |        |        |        |        |
|----|----|--------|--------|--------|--------|--------|
| 20 | 4  | 1.99   | 7.24   | 4.03   | 16.23  | 13.55  |
| 20 | 5  | 5.89   | 7.09   | 2.89   | 252.48 | 7.01   |
| 20 | 6  | 7.10   | 2.73   | 4.64   | 363.72 | 13.22  |
| 20 | 7  | 6.55   | 20.49  | 0.88   | 314.23 | 3.17   |
| 20 | 8  | 3.79   | 47.27  | 3.76   | 237.33 | 1.72   |
| 20 | 9  | 3.88   | 8.04   | 3.83   | 183.24 | 4.29   |
| 20 | 10 | 2.27   | 4.50   | 3.06   | 66.36  | 1.85   |
| 20 | 11 | 362.58 | 4.54   | 19.92  | 153.44 | 0.92   |
| 20 | 12 | 25.13  | 3.28   | 341.70 | 111.07 | 17.10  |
| 20 | 13 | 2.63   | 395.65 | 1.44   | 82.45  | 2.29   |
| 20 | 14 | 517.88 | 10.58  | 7.85   | 183.66 | 2.17   |
| 20 | 15 | 91.19  | 120.79 | 534.41 | 102.29 | 25.12  |
| 20 | 16 | 8.94   | 62.84  | 13.03  | 274.52 | 1.27   |
| 20 | 17 | 9.10   | 286.66 | 145.63 | 86.11  | 7.44   |
| 20 | 18 | 14.21  | 105.61 | 183.82 | 142.84 | 4.70   |
| 20 | 19 | 279.57 | 183.16 | 29.77  | 119.70 | 1.54   |
| 20 | 20 | 38.08  | 38.35  | 420.14 | 208.33 | 13.41  |
| 20 | 21 | 412.91 | 324.71 | 32.36  | 58.87  | 20.09  |
| 20 | 22 | 74.63  | 354.41 | 173.42 | 95.32  | 4.07   |
| 20 | 23 | 6.06   | 112.56 | 11.29  | 59.08  | 23.17  |
| 20 | 24 | 17.14  | 180.07 | 280.01 | 75.87  | 3.01   |
| 20 | 25 | 50.79  | 389.59 | 258.25 | 32.82  | 1.06   |
| 20 | 26 | 149.11 | 357.89 | 33.18  | 28.32  | 3.76   |
| 20 | 27 | 367.58 | 38.24  | 184.36 | 12.25  | 8.58   |
| 20 | 28 | 5.43   | 71.20  | 151.69 | 41.62  | 6.59   |
| 20 | 29 | 3.22   | 14.71  | 120.05 | 22.09  | 9.13   |
| 20 | 30 | 5.39   | 18.61  | 42.65  | 7.05   | 37.13  |
| 21 | 0  | 218.28 | 275.40 | 6.22   | 136.87 | 201.82 |
| 21 | 1  | 11.25  | 2.28   | 5.26   | 14.31  | 0.67   |
| 21 | 2  | 7.81   | 6.95   | 6.53   | 15.31  | 0.73   |
| 21 | 3  | 10.77  | 1.80   | 4.96   | 20.53  | 0.43   |
| 21 | 4  | 3.56   | 4.94   | 4.43   | 23.95  | 1.89   |
| 21 | 5  | 2.82   | 5.63   | 3.59   | 210.19 | 1.86   |
| 21 | 6  | 6.83   | 2.25   | 8.25   | 196.85 | 1.40   |
| 21 | 7  | 5.49   | 11.38  | 3.29   | 445.84 | 1.88   |
| 21 | 8  | 2.77   | 30.36  | 8.75   | 96.55  | 10.65  |
| 21 | 9  | 7.95   | 18.21  | 4.65   | 88.68  | 0.62   |
| 21 | 10 | 1.67   | 9.96   | 3.49   | 283.83 | 2.95   |
| 21 | 11 | 401.32 | 7.73   | 1.08   | 293.69 | 2.81   |
| 21 | 12 | 39.97  | 13.48  | 10.51  | 134.27 | 448.95 |
| 21 | 13 | 4.14   | 547.72 | 0.60   | 23.71  | 54.16  |
| 21 | 14 | 146.34 | 19.13  | 1.51   | 197.69 | 2.30   |
| 21 | 15 | 78.31  | 346.60 | 10.75  | 69.03  | 160.72 |
| 21 | 16 | 15.79  | 170.62 | 0.23   | 75.72  | 7.77   |

|    |    |        |        |        |        |        |
|----|----|--------|--------|--------|--------|--------|
| 21 | 17 | 12.67  | 222.48 | 2.35   | 41.54  | 0.75   |
| 21 | 18 | 15.79  | 87.88  | 5.09   | 128.29 | 133.29 |
| 21 | 19 | 454.52 | 185.03 | 0.93   | 91.20  | 352.04 |
| 21 | 20 | 41.91  | 81.39  | 9.21   | 178.03 | 223.19 |
| 21 | 21 | 86.50  | 288.45 | 5.21   | 25.59  | 117.34 |
| 21 | 22 | 377.30 | 303.75 | 10.34  | 54.13  | 12.49  |
| 21 | 23 | 14.53  | 88.13  | 1.20   | 52.40  | 5.21   |
| 21 | 24 | 26.40  | 135.06 | 9.86   | 141.96 | 105.65 |
| 21 | 25 | 67.49  | 284.34 | 7.75   | 127.90 | 7.36   |
| 21 | 26 | 345.84 | 196.88 | 9.03   | 41.73  | 144.23 |
| 21 | 27 | 252.67 | 61.50  | 6.89   | 37.41  | 306.58 |
| 21 | 28 | 15.75  | 16.67  | 4.27   | 16.78  | 164.35 |
| 21 | 29 | 3.35   | 38.99  | 1.89   | 36.98  | 136.20 |
| 21 | 30 | 5.34   | 50.72  | 1.88   | 7.31   | 10.58  |
| 22 | 0  | 242.10 | 7.19   | 216.02 | 188.23 | 225.43 |
| 22 | 1  | 3.09   | 8.49   | 2.57   | 3.70   | 0.30   |
| 22 | 2  | 1.71   | 4.50   | 3.16   | 6.21   | 0.43   |
| 22 | 3  | 2.89   | 5.31   | 0.48   | 3.71   | 0.86   |
| 22 | 4  | 4.51   | 20.69  | 2.44   | 5.28   | 0.22   |
| 22 | 5  | 7.29   | 9.09   | 3.09   | 54.11  | 1.17   |
| 22 | 6  | 9.45   | 1.35   | 3.26   | 70.82  | 1.73   |
| 22 | 7  | 7.79   | 12.63  | 1.96   | 81.27  | 3.51   |
| 22 | 8  | 2.24   | 8.56   | 3.94   | 28.87  | 1.31   |
| 22 | 9  | 2.80   | 2.48   | 3.68   | 20.93  | 0.50   |
| 22 | 10 | 1.39   | 3.23   | 1.93   | 39.79  | 4.23   |
| 22 | 11 | 436.10 | 2.50   | 25.84  | 48.33  | 1.43   |
| 22 | 12 | 34.20  | 1.20   | 520.03 | 235.99 | 443.94 |
| 22 | 13 | 2.52   | 14.05  | 1.15   | 81.50  | 62.90  |
| 22 | 14 | 374.72 | 2.54   | 10.65  | 371.75 | 10.44  |
| 22 | 15 | 256.11 | 9.60   | 370.80 | 201.04 | 323.84 |
| 22 | 16 | 8.48   | 5.34   | 34.22  | 422.38 | 14.68  |
| 22 | 17 | 16.52  | 7.90   | 201.39 | 179.37 | 4.74   |
| 22 | 18 | 9.98   | 3.17   | 184.62 | 138.79 | 253.23 |
| 22 | 19 | 344.73 | 6.75   | 10.94  | 13.15  | 234.60 |
| 22 | 20 | 20.97  | 2.60   | 136.04 | 128.98 | 105.83 |
| 22 | 21 | 110.99 | 8.60   | 23.63  | 15.52  | 245.55 |
| 22 | 22 | 200.61 | 8.96   | 164.37 | 148.70 | 9.58   |
| 22 | 23 | 8.16   | 1.93   | 8.21   | 55.90  | 5.44   |
| 22 | 24 | 17.81  | 5.06   | 276.60 | 152.20 | 49.00  |
| 22 | 25 | 79.88  | 10.68  | 370.19 | 471.40 | 6.41   |
| 22 | 26 | 416.92 | 7.38   | 39.94  | 38.89  | 102.57 |
| 22 | 27 | 239.34 | 1.79   | 176.38 | 26.72  | 259.47 |
| 22 | 28 | 10.87  | 0.66   | 132.49 | 104.98 | 120.33 |
| 22 | 29 | 4.78   | 2.00   | 182.67 | 34.41  | 277.95 |

|    |    |        |        |        |        |        |
|----|----|--------|--------|--------|--------|--------|
| 22 | 30 | 4.29   | 1.45   | 35.89  | 18.89  | 14.04  |
| 23 | 0  | 43.84  | 282.36 | 303.17 | 4.61   | 266.49 |
| 23 | 1  | 109.95 | 0.88   | 3.44   | 1.26   | 0.32   |
| 23 | 2  | 86.80  | 3.38   | 2.07   | 2.92   | 0.74   |
| 23 | 3  | 106.28 | 2.89   | 2.57   | 2.63   | 0.28   |
| 23 | 4  | 7.00   | 2.51   | 3.89   | 1.21   | 1.29   |
| 23 | 5  | 26.19  | 4.04   | 1.07   | 66.49  | 1.19   |
| 23 | 6  | 31.24  | 2.06   | 5.33   | 145.19 | 2.18   |
| 23 | 7  | 32.91  | 6.17   | 4.07   | 200.71 | 6.28   |
| 23 | 8  | 20.69  | 10.69  | 2.57   | 67.59  | 5.38   |
| 23 | 9  | 36.69  | 5.53   | 6.56   | 44.85  | 1.11   |
| 23 | 10 | 6.74   | 10.52  | 3.12   | 75.41  | 5.09   |
| 23 | 11 | 25.60  | 4.71   | 16.29  | 89.92  | 2.72   |
| 23 | 12 | 3.37   | 7.21   | 250.02 | 101.84 | 268.70 |
| 23 | 13 | 3.61   | 156.51 | 1.37   | 26.79  | 33.34  |
| 23 | 14 | 6.57   | 28.86  | 8.15   | 90.18  | 7.01   |
| 23 | 15 | 9.38   | 610.63 | 614.26 | 122.39 | 623.72 |
| 23 | 16 | 1.65   | 78.66  | 17.32  | 86.40  | 18.06  |
| 23 | 17 | 1.47   | 122.47 | 133.16 | 54.06  | 7.82   |
| 23 | 18 | 1.99   | 17.71  | 47.65  | 24.77  | 197.21 |
| 23 | 19 | 56.16  | 204.76 | 34.74  | 3.24   | 92.18  |
| 23 | 20 | 7.29   | 125.73 | 285.05 | 24.85  | 168.74 |
| 23 | 21 | 13.37  | 285.45 | 34.28  | 9.59   | 172.78 |
| 23 | 22 | 63.55  | 234.74 | 141.20 | 6.40   | 9.02   |
| 23 | 23 | 3.80   | 66.56  | 5.34   | 4.90   | 2.50   |
| 23 | 24 | 7.11   | 41.38  | 161.11 | 2.20   | 47.68  |
| 23 | 25 | 11.75  | 367.74 | 223.71 | 9.02   | 6.27   |
| 23 | 26 | 60.97  | 194.37 | 30.22  | 5.20   | 76.65  |
| 23 | 27 | 60.26  | 34.09  | 158.85 | 3.03   | 214.74 |
| 23 | 28 | 3.33   | 81.94  | 190.78 | 2.93   | 164.76 |
| 23 | 29 | 1.53   | 29.10  | 177.52 | 2.70   | 160.86 |
| 23 | 30 | 16.67  | 43.53  | 47.30  | 0.77   | 7.17   |
| 24 | 0  | 249.34 | 2.56   | 82.70  | 290.19 | 6.27   |
| 24 | 1  | 2.34   | 15.46  | 158.75 | 4.31   | 24.73  |
| 24 | 2  | 3.18   | 7.48   | 1.57   | 7.75   | 13.48  |
| 24 | 3  | 5.54   | 4.18   | 146.70 | 12.26  | 25.42  |
| 24 | 4  | 2.74   | 14.15  | 19.79  | 5.37   | 41.29  |
| 24 | 5  | 2.81   | 6.87   | 3.78   | 18.50  | 27.22  |
| 24 | 6  | 6.93   | 2.59   | 37.91  | 27.59  | 30.69  |
| 24 | 7  | 3.83   | 3.01   | 23.48  | 36.82  | 7.44   |
| 24 | 8  | 2.38   | 4.32   | 7.44   | 10.51  | 1.43   |
| 24 | 9  | 5.83   | 2.86   | 43.09  | 9.82   | 2.75   |
| 24 | 10 | 2.57   | 1.49   | 14.90  | 28.19  | 1.81   |
| 24 | 11 | 129.42 | 2.93   | 3.48   | 36.07  | 1.78   |

|    |    |        |        |        |        |      |
|----|----|--------|--------|--------|--------|------|
| 24 | 12 | 12.17  | 3.69   | 23.97  | 235.44 | 0.50 |
| 24 | 13 | 1.84   | 0.41   | 3.28   | 52.42  | 1.83 |
| 24 | 14 | 635.24 | 0.45   | 3.52   | 330.76 | 5.49 |
| 24 | 15 | 90.11  | 1.09   | 24.24  | 212.50 | 2.05 |
| 24 | 16 | 7.47   | 0.26   | 14.46  | 435.47 | 3.47 |
| 24 | 17 | 5.85   | 1.34   | 125.23 | 281.72 | 1.62 |
| 24 | 18 | 6.24   | 2.48   | 181.94 | 150.36 | 1.03 |
| 24 | 19 | 76.06  | 2.59   | 22.35  | 14.78  | 1.93 |
| 24 | 20 | 51.69  | 2.23   | 63.91  | 162.11 | 3.58 |
| 24 | 21 | 270.58 | 0.39   | 32.12  | 9.12   | 3.99 |
| 24 | 22 | 232.38 | 1.44   | 135.79 | 70.34  | 4.25 |
| 24 | 23 | 6.59   | 2.94   | 2.13   | 19.71  | 5.41 |
| 24 | 24 | 24.01  | 2.41   | 114.75 | 290.89 | 2.26 |
| 24 | 25 | 56.99  | 1.49   | 28.36  | 127.96 | 3.83 |
| 24 | 26 | 108.76 | 0.92   | 20.89  | 18.70  | 4.39 |
| 24 | 27 | 403.57 | 0.12   | 91.32  | 6.37   | 5.35 |
| 24 | 28 | 5.79   | 0.33   | 56.40  | 154.08 | 3.21 |
| 24 | 29 | 0.97   | 1.21   | 20.13  | 124.27 | 1.88 |
| 24 | 30 | 8.02   | 0.67   | 9.33   | 11.23  | 6.32 |
| 25 | 0  | 278.24 | 235.91 | 250.10 | 45.96  | 1.49 |
| 25 | 1  | 5.46   | 2.28   | 60.94  | 7.64   | 5.05 |
| 25 | 2  | 5.06   | 4.84   | 3.61   | 1.71   | 2.37 |
| 25 | 3  | 7.79   | 2.89   | 53.85  | 7.25   | 4.17 |
| 25 | 4  | 4.75   | 1.42   | 8.42   | 2.59   | 4.14 |
| 25 | 5  | 7.78   | 3.67   | 2.79   | 10.01  | 2.89 |
| 25 | 6  | 11.96  | 1.84   | 12.10  | 57.32  | 3.94 |
| 25 | 7  | 5.31   | 10.03  | 7.04   | 57.83  | 1.19 |
| 25 | 8  | 6.17   | 16.28  | 8.09   | 24.17  | 0.68 |
| 25 | 9  | 6.54   | 7.76   | 11.20  | 22.67  | 1.15 |
| 25 | 10 | 0.36   | 8.68   | 6.45   | 22.12  | 0.71 |
| 25 | 11 | 72.05  | 0.93   | 6.74   | 10.85  | 1.39 |
| 25 | 12 | 10.24  | 5.08   | 79.96  | 46.00  | 0.26 |
| 25 | 13 | 1.58   | 51.08  | 1.91   | 6.05   | 1.07 |
| 25 | 14 | 86.54  | 9.57   | 6.33   | 60.98  | 0.30 |
| 25 | 15 | 125.70 | 121.56 | 54.22  | 81.40  | 0.10 |
| 25 | 16 | 4.38   | 112.72 | 36.05  | 158.89 | 0.63 |
| 25 | 17 | 23.78  | 300.54 | 339.53 | 122.26 | 2.52 |
| 25 | 18 | 23.67  | 215.30 | 504.80 | 29.14  | 0.39 |
| 25 | 19 | 629.06 | 424.69 | 71.84  | 3.09   | 0.52 |
| 25 | 20 | 44.43  | 81.10  | 110.41 | 68.69  | 0.50 |
| 25 | 21 | 166.63 | 280.25 | 64.64  | 6.81   | 0.10 |
| 25 | 22 | 198.74 | 246.39 | 260.22 | 86.33  | 1.01 |
| 25 | 23 | 13.30  | 74.78  | 6.24   | 36.81  | 0.83 |
| 25 | 24 | 31.19  | 96.80  | 288.15 | 116.15 | 4.50 |



|    |    |        |        |        |        |        |
|----|----|--------|--------|--------|--------|--------|
| 25 | 25 | 35.22  | 252.21 | 48.93  | 119.58 | 0.58   |
| 25 | 26 | 273.97 | 275.94 | 15.01  | 40.70  | 0.37   |
| 25 | 27 | 127.57 | 171.37 | 181.46 | 10.69  | 1.34   |
| 25 | 28 | 6.89   | 157.67 | 92.42  | 614.20 | 2.19   |
| 25 | 29 | 4.53   | 17.30  | 74.50  | 642.92 | 2.78   |
| 25 | 30 | 3.16   | 30.83  | 30.87  | 39.54  | 1.46   |
| 26 | 0  | 85.09  | 72.15  | 4.27   | 5.52   | 44.93  |
| 26 | 1  | 2.99   | 3.54   | 1.73   | 3.58   | 1.65   |
| 26 | 2  | 2.28   | 1.39   | 0.12   | 1.09   | 0.56   |
| 26 | 3  | 2.80   | 1.49   | 1.68   | 2.58   | 0.89   |
| 26 | 4  | 12.75  | 4.20   | 1.50   | 2.61   | 1.80   |
| 26 | 5  | 32.89  | 2.07   | 0.39   | 49.50  | 1.36   |
| 26 | 6  | 2.49   | 0.74   | 0.74   | 53.33  | 1.66   |
| 26 | 7  | 10.37  | 5.86   | 1.66   | 58.62  | 3.07   |
| 26 | 8  | 25.14  | 12.63  | 0.61   | 21.47  | 3.65   |
| 26 | 9  | 6.95   | 14.41  | 0.77   | 13.58  | 0.32   |
| 26 | 10 | 0.96   | 3.65   | 0.22   | 21.52  | 3.41   |
| 26 | 11 | 90.20  | 1.05   | 3.89   | 20.41  | 1.01   |
| 26 | 12 | 10.02  | 1.26   | 0.45   | 41.48  | 15.99  |
| 26 | 13 | 1.14   | 92.62  | 0.70   | 16.85  | 9.07   |
| 26 | 14 | 54.99  | 5.47   | 0.91   | 30.06  | 4.12   |
| 26 | 15 | 73.54  | 76.28  | 0.20   | 36.96  | 49.24  |
| 26 | 16 | 4.71   | 81.55  | 1.22   | 25.12  | 8.85   |
| 26 | 17 | 7.48   | 111.80 | 0.77   | 11.24  | 3.44   |
| 26 | 18 | 5.00   | 75.05  | 2.02   | 2.69   | 30.25  |
| 26 | 19 | 171.12 | 153.72 | 3.52   | 8.95   | 44.06  |
| 26 | 20 | 14.04  | 38.86  | 0.51   | 1.81   | 20.62  |
| 26 | 21 | 54.57  | 78.86  | 0.88   | 0.52   | 35.07  |
| 26 | 22 | 49.90  | 138.42 | 0.74   | 0.97   | 9.42   |
| 26 | 23 | 6.95   | 46.69  | 0.12   | 0.81   | 36.24  |
| 26 | 24 | 100.77 | 52.08  | 1.20   | 2.64   | 619.43 |
| 26 | 25 | 235.35 | 54.42  | 0.51   | 1.21   | 12.10  |
| 26 | 26 | 99.06  | 148.43 | 0.36   | 1.03   | 60.89  |
| 26 | 27 | 124.09 | 525.93 | 1.11   | 0.81   | 118.31 |
| 26 | 28 | 10.48  | 587.74 | 1.13   | 1.83   | 248.02 |
| 26 | 29 | 6.06   | 122.98 | 1.92   | 3.39   | 300.06 |
| 26 | 30 | 6.14   | 189.97 | 0.68   | 0.56   | 33.44  |
| 27 | 0  | 27.68  | 11.26  | 166.56 | 115.67 | 47.72  |
| 27 | 1  | 6.08   | 169.21 | 11.46  | 8.94   | 11.76  |
| 27 | 2  | 3.71   | 69.37  | 1.85   | 6.49   | 9.83   |
| 27 | 3  | 6.65   | 132.87 | 12.98  | 7.15   | 5.06   |
| 27 | 4  | 43.69  | 6.93   | 3.61   | 1.52   | 125.58 |
| 27 | 5  | 107.99 | 2.98   | 0.81   | 13.07  | 69.52  |
| 27 | 6  | 13.19  | 17.11  | 6.22   | 50.62  | 103.64 |

|    |    |       |        |        |        |        |
|----|----|-------|--------|--------|--------|--------|
| 27 | 7  | 16.00 | 1.00   | 1.63   | 36.52  | 45.98  |
| 27 | 8  | 84.27 | 6.07   | 1.28   | 10.88  | 35.70  |
| 27 | 9  | 13.38 | 2.24   | 2.33   | 12.30  | 0.66   |
| 27 | 10 | 2.10  | 4.72   | 2.18   | 9.72   | 34.27  |
| 27 | 11 | 20.81 | 2.95   | 1.30   | 6.98   | 4.56   |
| 27 | 12 | 6.70  | 2.20   | 57.53  | 35.71  | 10.49  |
| 27 | 13 | 0.93  | 5.72   | 0.45   | 10.50  | 2.71   |
| 27 | 14 | 23.07 | 4.46   | 2.97   | 64.03  | 3.54   |
| 27 | 15 | 27.87 | 6.22   | 67.79  | 38.07  | 20.89  |
| 27 | 16 | 1.56  | 4.24   | 15.07  | 33.81  | 2.11   |
| 27 | 17 | 2.91  | 18.30  | 76.21  | 56.26  | 1.67   |
| 27 | 18 | 2.39  | 7.53   | 152.39 | 66.51  | 43.86  |
| 27 | 19 | 93.96 | 13.38  | 21.91  | 5.15   | 75.10  |
| 27 | 20 | 8.83  | 2.18   | 72.40  | 63.21  | 25.80  |
| 27 | 21 | 19.00 | 1.57   | 19.02  | 6.84   | 35.52  |
| 27 | 22 | 26.55 | 7.65   | 100.98 | 178.29 | 4.11   |
| 27 | 23 | 2.67  | 1.81   | 0.81   | 88.14  | 2.38   |
| 27 | 24 | 34.82 | 1.07   | 174.70 | 292.07 | 26.05  |
| 27 | 25 | 49.23 | 8.26   | 143.30 | 143.36 | 0.61   |
| 27 | 26 | 36.32 | 12.41  | 26.06  | 16.29  | 20.38  |
| 27 | 27 | 34.49 | 5.52   | 147.65 | 3.36   | 42.19  |
| 27 | 28 | 2.89  | 8.08   | 238.25 | 105.89 | 51.62  |
| 27 | 29 | 2.45  | 25.65  | 269.17 | 281.69 | 25.29  |
| 27 | 30 | 3.02  | 18.85  | 101.97 | 15.27  | 4.54   |
| 28 | 0  | 52.71 | 200.02 | 85.84  | 109.97 | 12.66  |
| 28 | 1  | 2.52  | 1.97   | 5.03   | 4.12   | 140.33 |
| 28 | 2  | 2.67  | 3.48   | 1.65   | 4.67   | 89.00  |
| 28 | 3  | 2.93  | 1.57   | 4.52   | 5.12   | 29.40  |
| 28 | 4  | 2.18  | 1.56   | 1.21   | 1.08   | 10.29  |
| 28 | 5  | 2.10  | 3.17   | 3.50   | 10.12  | 4.96   |
| 28 | 6  | 3.20  | 1.85   | 16.01  | 42.22  | 7.00   |
| 28 | 7  | 0.62  | 5.26   | 6.52   | 41.39  | 5.35   |
| 28 | 8  | 1.63  | 6.62   | 3.13   | 14.24  | 5.06   |
| 28 | 9  | 1.52  | 9.10   | 17.27  | 14.72  | 5.64   |
| 28 | 10 | 0.81  | 5.59   | 2.26   | 15.22  | 4.65   |
| 28 | 11 | 44.42 | 1.55   | 6.31   | 12.60  | 0.37   |
| 28 | 12 | 3.52  | 2.33   | 88.56  | 33.63  | 2.73   |
| 28 | 13 | 0.79  | 53.74  | 0.21   | 8.94   | 5.94   |
| 28 | 14 | 18.75 | 3.78   | 2.21   | 60.59  | 20.05  |
| 28 | 15 | 33.97 | 86.93  | 33.51  | 33.47  | 5.48   |
| 28 | 16 | 2.27  | 75.81  | 11.67  | 28.73  | 4.93   |
| 28 | 17 | 3.13  | 66.04  | 88.58  | 57.57  | 11.20  |
| 28 | 18 | 4.38  | 26.74  | 226.21 | 61.63  | 13.51  |
| 28 | 19 | 46.80 | 81.54  | 31.95  | 3.71   | 25.67  |

|    |    |        |        |        |        |        |
|----|----|--------|--------|--------|--------|--------|
| 28 | 20 | 5.88   | 20.63  | 92.65  | 63.45  | 27.06  |
| 28 | 21 | 15.21  | 149.15 | 26.10  | 6.49   | 15.70  |
| 28 | 22 | 19.71  | 125.14 | 104.82 | 173.82 | 1.32   |
| 28 | 23 | 2.58   | 46.69  | 9.04   | 88.40  | 0.36   |
| 28 | 24 | 134.75 | 61.60  | 271.74 | 282.51 | 6.34   |
| 28 | 25 | 575.59 | 64.11  | 194.72 | 139.62 | 0.29   |
| 28 | 26 | 119.66 | 383.02 | 15.22  | 17.04  | 6.14   |
| 28 | 27 | 23.16  | 249.92 | 293.29 | 4.94   | 8.04   |
| 28 | 28 | 1.93   | 387.98 | 327.46 | 107.52 | 13.31  |
| 28 | 29 | 6.98   | 37.17  | 257.54 | 271.23 | 16.05  |
| 28 | 30 | 3.82   | 82.85  | 74.70  | 14.81  | 28.62  |
| 29 | 0  | 17.33  | 2.98   | 11.16  | 116.70 | 136.12 |
| 29 | 1  | 1.90   | 5.63   | 45.24  | 3.95   | 2.74   |
| 29 | 2  | 0.74   | 2.20   | 38.01  | 3.49   | 0.48   |
| 29 | 3  | 1.89   | 4.27   | 31.13  | 1.53   | 2.63   |
| 29 | 4  | 0.85   | 2.72   | 2.96   | 2.23   | 23.26  |
| 29 | 5  | 1.64   | 0.93   | 4.52   | 29.32  | 12.87  |
| 29 | 6  | 2.47   | 0.56   | 5.35   | 43.59  | 19.41  |
| 29 | 7  | 4.77   | 1.43   | 1.17   | 39.21  | 4.22   |
| 29 | 8  | 1.40   | 2.54   | 7.12   | 13.06  | 5.87   |
| 29 | 9  | 4.23   | 1.68   | 0.88   | 12.22  | 0.52   |
| 29 | 10 | 0.39   | 1.43   | 25.95  | 15.89  | 6.64   |
| 29 | 11 | 19.76  | 0.34   | 2.10   | 8.51   | 0.61   |
| 29 | 12 | 1.72   | 0.41   | 26.30  | 18.94  | 61.09  |
| 29 | 13 | 0.61   | 1.06   | 4.33   | 6.01   | 10.78  |
| 29 | 14 | 9.94   | 0.28   | 4.36   | 30.93  | 3.64   |
| 29 | 15 | 23.22  | 1.35   | 21.23  | 25.03  | 77.39  |
| 29 | 16 | 3.86   | 1.22   | 7.35   | 63.57  | 8.55   |
| 29 | 17 | 1.31   | 5.20   | 20.40  | 37.41  | 4.10   |
| 29 | 18 | 3.25   | 1.73   | 32.25  | 55.58  | 188.72 |
| 29 | 19 | 21.04  | 3.25   | 7.17   | 5.63   | 350.67 |
| 29 | 20 | 4.27   | 0.49   | 9.82   | 60.74  | 329.89 |
| 29 | 21 | 9.97   | 2.85   | 15.49  | 6.98   | 202.18 |
| 29 | 22 | 32.87  | 2.76   | 37.76  | 170.94 | 8.12   |
| 29 | 23 | 36.87  | 0.72   | 1.22   | 79.24  | 3.90   |
| 29 | 24 | 618.86 | 1.09   | 51.74  | 252.35 | 77.03  |
| 29 | 25 | 97.13  | 2.29   | 41.43  | 149.62 | 3.19   |
| 29 | 26 | 21.89  | 8.39   | 7.00   | 14.67  | 58.79  |
| 29 | 27 | 34.76  | 6.92   | 93.67  | 3.47   | 93.69  |
| 29 | 28 | 4.58   | 7.61   | 62.18  | 245.19 | 268.58 |
| 29 | 29 | 2.76   | 12.82  | 319.26 | 100.32 | 99.16  |
| 29 | 30 | 2.21   | 15.47  | 172.44 | 12.15  | 17.78  |
| 30 | 0  | 2.92   | 117.30 | 16.39  | 117.97 | 109.95 |
| 30 | 1  | 1.46   | 2.41   | 76.99  | 9.65   | 8.70   |

|    |    |      |        |        |        |        |
|----|----|------|--------|--------|--------|--------|
| 30 | 2  | 0.71 | 3.93   | 62.38  | 7.71   | 5.83   |
| 30 | 3  | 1.13 | 2.52   | 50.75  | 5.21   | 0.70   |
| 30 | 4  | 4.74 | 2.36   | 3.73   | 2.99   | 23.58  |
| 30 | 5  | 7.18 | 4.18   | 7.84   | 18.82  | 12.09  |
| 30 | 6  | 3.51 | 1.19   | 7.93   | 45.96  | 20.12  |
| 30 | 7  | 5.43 | 3.77   | 3.52   | 37.30  | 4.35   |
| 30 | 8  | 6.03 | 8.19   | 11.09  | 10.01  | 8.83   |
| 30 | 9  | 7.02 | 4.81   | 1.29   | 12.20  | 0.84   |
| 30 | 10 | 0.83 | 5.65   | 42.88  | 9.25   | 8.45   |
| 30 | 11 | 0.68 | 0.83   | 3.54   | 3.93   | 0.58   |
| 30 | 12 | 5.12 | 1.34   | 7.40   | 17.74  | 31.97  |
| 30 | 13 | 0.25 | 15.49  | 7.32   | 8.23   | 2.88   |
| 30 | 14 | 0.45 | 1.52   | 5.89   | 44.92  | 1.81   |
| 30 | 15 | 0.85 | 18.51  | 16.45  | 39.57  | 55.47  |
| 30 | 16 | 1.34 | 21.76  | 11.24  | 56.07  | 4.73   |
| 30 | 17 | 0.77 | 75.76  | 13.17  | 21.42  | 3.43   |
| 30 | 18 | 0.40 | 8.63   | 21.76  | 59.31  | 149.24 |
| 30 | 19 | 1.97 | 41.64  | 10.30  | 3.44   | 299.56 |
| 30 | 20 | 4.52 | 6.95   | 6.76   | 53.46  | 370.65 |
| 30 | 21 | 0.79 | 140.12 | 13.92  | 7.78   | 216.17 |
| 30 | 22 | 1.25 | 177.56 | 24.37  | 176.15 | 8.76   |
| 30 | 23 | 0.52 | 67.76  | 0.61   | 87.27  | 4.33   |
| 30 | 24 | 1.16 | 93.80  | 31.62  | 264.55 | 71.94  |
| 30 | 25 | 1.74 | 46.99  | 15.82  | 150.30 | 5.07   |
| 30 | 26 | 1.16 | 473.96 | 4.12   | 12.91  | 66.50  |
| 30 | 27 | 1.06 | 409.94 | 49.01  | 3.42   | 79.00  |
| 30 | 28 | 0.16 | 213.87 | 35.30  | 244.99 | 231.30 |
| 30 | 29 | 0.58 | 98.13  | 191.23 | 125.17 | 241.87 |
| 30 | 30 | 0.15 | 132.55 | 101.49 | 13.91  | 14.81  |

**Table S27.** The original TDM matrix elements between  $S_0$  and  $S_n$  calculated for I-Alq<sub>3</sub>.

| States |       | TDM elements between $S_0$ and $S_n$ /debye |             |             |             |             |
|--------|-------|---------------------------------------------|-------------|-------------|-------------|-------------|
| $S_0$  | $S_n$ | Conformer 1                                 | Conformer 2 | Conformer 3 | Conformer 4 | Conformer 5 |
| 0      | 1     | 0.21                                        | 0.22        | 0.66        | 0.29        | 0.61        |
| 0      | 2     | 0.05                                        | 0.41        | 0.10        | 0.39        | 0.13        |
| 0      | 3     | 0.35                                        | 0.62        | 0.24        | 0.27        | 0.62        |
| 0      | 4     | 1.04                                        | 0.56        | 0.33        | 0.60        | 0.27        |
| 0      | 5     | 0.67                                        | 0.68        | 0.26        | 0.51        | 1.00        |
| 0      | 6     | 0.73                                        | 0.32        | 0.66        | 0.29        | 0.45        |
| 0      | 7     | 0.61                                        | 0.30        | 0.52        | 0.57        | 0.23        |
| 0      | 8     | 0.58                                        | 0.35        | 0.08        | 0.61        | 0.52        |
| 0      | 9     | 0.45                                        | 1.08        | 0.86        | 0.44        | 0.80        |

|   |    |      |      |      |      |      |
|---|----|------|------|------|------|------|
| 0 | 10 | 0.09 | 1.11 | 0.38 | 0.54 | 0.62 |
| 0 | 11 | 1.30 | 0.25 | 0.55 | 0.24 | 0.84 |
| 0 | 12 | 0.66 | 1.06 | 0.88 | 0.81 | 0.91 |
| 0 | 13 | 0.80 | 0.89 | 0.67 | 1.19 | 2.17 |
| 0 | 14 | 1.34 | 1.97 | 1.60 | 0.69 | 1.69 |
| 0 | 15 | 1.59 | 0.39 | 0.73 | 2.56 | 0.94 |
| 0 | 16 | 0.27 | 0.62 | 1.58 | 1.31 | 1.43 |
| 0 | 17 | 2.23 | 1.77 | 0.94 | 1.56 | 1.95 |
| 0 | 18 | 1.67 | 1.80 | 1.34 | 1.07 | 1.08 |
| 0 | 19 | 0.30 | 1.14 | 1.29 | 1.09 | 1.42 |
| 0 | 20 | 1.71 | 1.37 | 2.37 | 0.84 | 1.60 |
| 0 | 21 | 2.12 | 1.70 | 1.31 | 1.18 | 1.87 |
| 0 | 22 | 0.83 | 1.82 | 1.62 | 1.53 | 0.64 |
| 0 | 23 | 1.19 | 1.39 | 0.72 | 1.94 | 1.60 |
| 0 | 24 | 0.46 | 0.38 | 0.11 | 1.05 | 1.07 |
| 0 | 25 | 0.35 | 0.58 | 1.71 | 1.38 | 0.85 |
| 0 | 26 | 0.56 | 1.36 | 1.13 | 1.28 | 1.68 |
| 0 | 27 | 1.10 | 0.91 | 0.47 | 1.35 | 1.23 |
| 0 | 28 | 1.01 | 1.12 | 1.55 | 0.33 | 0.56 |
| 0 | 29 | 0.33 | 0.78 | 0.97 | 1.69 | 1.77 |
| 0 | 30 | 1.75 | 1.78 | 1.14 | 1.22 | 1.54 |

**Table S28.** The original TDM matrix elements between  $T_i$  and  $T_j$  calculated for I-Alq<sub>3</sub>.

| States |    | TDM elements between $T_i$ and $T_j$ /debye |             |             |             |             |
|--------|----|---------------------------------------------|-------------|-------------|-------------|-------------|
| Ti     | Tj | Conformer 1                                 | Conformer 2 | Conformer 3 | Conformer 4 | Conformer 5 |
| 1      | 1  | 0.00                                        | 0.00        | 0.00        | 0.00        | 0.00        |
| 1      | 2  | 0.27                                        | 0.63        | 0.00        | 0.96        | 0.25        |
| 1      | 3  | 38.64                                       | 0.00        | 0.27        | 0.00        | 44.95       |
| 1      | 4  | 0.87                                        | 0.18        | 0.18        | 0.00        | 0.02        |
| 1      | 5  | 0.60                                        | 0.00        | 0.04        | 0.48        | 0.00        |
| 1      | 6  | 0.00                                        | 0.40        | 0.05        | 0.35        | 0.03        |
| 1      | 7  | 0.69                                        | 0.16        | 0.22        | 0.00        | 0.07        |
| 1      | 8  | 0.32                                        | 0.40        | 0.73        | 0.24        | 0.25        |
| 1      | 9  | 40.83                                       | 0.05        | 0.39        | 0.44        | 0.01        |
| 1      | 10 | 60.80                                       | 0.46        | 1.85        | 0.13        | 0.59        |
| 1      | 11 | 0.19                                        | 0.32        | 0.70        | 0.04        | 0.19        |
| 1      | 12 | 39.01                                       | 0.16        | 0.01        | 0.28        | 0.10        |
| 1      | 13 | 0.00                                        | 0.20        | 0.43        | 0.08        | 0.08        |
| 1      | 14 | 0.26                                        | 0.07        | 0.25        | 0.19        | 0.01        |
| 1      | 15 | 0.16                                        | 0.29        | 0.18        | 0.03        | 0.00        |
| 1      | 16 | 9.58                                        | 0.34        | 0.80        | 0.23        | 15.99       |
| 1      | 17 | 0.35                                        | 0.01        | 40.28       | 0.08        | 84.85       |

|   |    |       |        |       |        |        |
|---|----|-------|--------|-------|--------|--------|
| 1 | 18 | 0.32  | 24.20  | 6.80  | 0.23   | 0.01   |
| 1 | 19 | 41.80 | 0.14   | 0.00  | 0.01   | 0.01   |
| 1 | 20 | 16.41 | 0.50   | 0.00  | 0.05   | 0.26   |
| 1 | 21 | 86.58 | 0.05   | 0.11  | 18.50  | 0.36   |
| 1 | 22 | 0.20  | 0.05   | 0.06  | 0.00   | 0.02   |
| 1 | 23 | 73.25 | 0.16   | 0.00  | 0.00   | 0.01   |
| 1 | 24 | 0.00  | 0.03   | 0.00  | 3.98   | 0.11   |
| 1 | 25 | 0.00  | 0.63   | 0.07  | 0.00   | 0.00   |
| 1 | 26 | 0.00  | 2.32   | 0.50  | 0.00   | 1.87   |
| 1 | 27 | 0.01  | 0.00   | 0.08  | 0.00   | 0.00   |
| 1 | 28 | 0.87  | 0.00   | 0.00  | 0.00   | 0.01   |
| 1 | 29 | 0.00  | 0.00   | 0.00  | 0.00   | 0.02   |
| 1 | 30 | 81.13 | 1.26   | 0.00  | 0.00   | 0.00   |
| 2 | 2  | 0.00  | 0.00   | 0.00  | 0.00   | 0.00   |
| 2 | 3  | 0.02  | 0.28   | 0.42  | 0.53   | 83.75  |
| 2 | 4  | 0.18  | 0.16   | 0.33  | 0.00   | 0.00   |
| 2 | 5  | 0.36  | 0.00   | 0.01  | 0.49   | 0.00   |
| 2 | 6  | 0.00  | 103.15 | 0.30  | 48.96  | 0.00   |
| 2 | 7  | 1.49  | 33.10  | 0.05  | 0.00   | 0.00   |
| 2 | 8  | 0.14  | 119.38 | 0.01  | 38.48  | 0.00   |
| 2 | 9  | 0.33  | 0.22   | 0.01  | 111.73 | 0.00   |
| 2 | 10 | 0.42  | 59.73  | 0.23  | 55.42  | 1.13   |
| 2 | 11 | 0.11  | 32.40  | 0.07  | 0.36   | 0.25   |
| 2 | 12 | 1.06  | 1.30   | 0.01  | 0.17   | 0.47   |
| 2 | 13 | 0.00  | 24.24  | 0.07  | 0.81   | 0.00   |
| 2 | 14 | 0.02  | 0.36   | 0.06  | 48.01  | 0.47   |
| 2 | 15 | 0.01  | 20.99  | 0.03  | 0.27   | 0.78   |
| 2 | 16 | 0.25  | 1.58   | 0.01  | 63.57  | 121.98 |
| 2 | 17 | 0.02  | 0.18   | 0.04  | 28.38  | 0.65   |
| 2 | 18 | 0.08  | 2.31   | 0.20  | 87.41  | 0.17   |
| 2 | 19 | 0.30  | 0.53   | 0.00  | 0.19   | 0.00   |
| 2 | 20 | 0.11  | 1.41   | 0.00  | 19.08  | 30.82  |
| 2 | 21 | 0.32  | 0.10   | 0.00  | 3.98   | 21.79  |
| 2 | 22 | 0.14  | 0.25   | 33.98 | 0.12   | 0.00   |
| 2 | 23 | 0.26  | 0.41   | 0.00  | 0.00   | 0.23   |
| 2 | 24 | 0.00  | 0.07   | 0.00  | 4.11   | 0.50   |
| 2 | 25 | 0.00  | 4.78   | 0.06  | 0.11   | 0.00   |
| 2 | 26 | 0.00  | 5.71   | 2.14  | 0.00   | 143.45 |
| 2 | 27 | 0.34  | 0.03   | 0.09  | 0.00   | 0.00   |
| 2 | 28 | 29.75 | 0.00   | 0.00  | 0.00   | 0.00   |
| 2 | 29 | 0.00  | 0.04   | 0.00  | 0.00   | 0.00   |
| 2 | 30 | 0.05  | 0.33   | 0.05  | 0.07   | 0.00   |
| 3 | 3  | 0.00  | 0.00   | 0.00  | 0.00   | 0.00   |
| 3 | 4  | 32.35 | 82.21  | 86.71 | 37.77  | 0.22   |

|   |    |        |        |        |        |        |
|---|----|--------|--------|--------|--------|--------|
| 3 | 5  | 98.79  | 0.38   | 10.19  | 0.16   | 0.01   |
| 3 | 6  | 0.07   | 0.46   | 116.70 | 0.79   | 0.62   |
| 3 | 7  | 0.17   | 24.42  | 29.07  | 0.25   | 0.59   |
| 3 | 8  | 0.07   | 0.67   | 23.77  | 31.45  | 0.72   |
| 3 | 9  | 0.47   | 48.70  | 0.88   | 26.89  | 0.15   |
| 3 | 10 | 89.60  | 41.89  | 1.46   | 48.19  | 63.82  |
| 3 | 11 | 65.55  | 22.72  | 0.70   | 0.35   | 61.18  |
| 3 | 12 | 39.36  | 79.32  | 34.50  | 0.12   | 85.07  |
| 3 | 13 | 33.70  | 59.71  | 67.36  | 12.57  | 0.17   |
| 3 | 14 | 85.04  | 58.27  | 1.12   | 39.67  | 0.26   |
| 3 | 15 | 95.59  | 2.38   | 0.88   | 0.55   | 0.37   |
| 3 | 16 | 2.05   | 2.05   | 0.28   | 1.53   | 74.12  |
| 3 | 17 | 8.35   | 0.27   | 0.26   | 89.77  | 65.34  |
| 3 | 18 | 28.18  | 0.00   | 1.08   | 0.99   | 0.79   |
| 3 | 19 | 6.27   | 0.41   | 0.13   | 0.50   | 0.40   |
| 3 | 20 | 29.82  | 55.22  | 0.07   | 26.42  | 61.26  |
| 3 | 21 | 22.81  | 25.76  | 0.17   | 0.00   | 9.81   |
| 3 | 32 | 3.54   | 95.70  | 1.70   | 3.10   | 0.57   |
| 3 | 23 | 79.58  | 92.95  | 0.12   | 0.17   | 0.10   |
| 3 | 24 | 39.78  | 0.71   | 0.22   | 0.00   | 0.39   |
| 3 | 25 | 29.65  | 1.76   | 2.65   | 13.71  | 0.04   |
| 3 | 26 | 0.23   | 0.00   | 6.86   | 0.11   | 0.44   |
| 3 | 27 | 0.73   | 0.26   | 2.67   | 0.44   | 0.04   |
| 3 | 28 | 0.06   | 0.39   | 0.07   | 0.14   | 0.07   |
| 3 | 29 | 0.28   | 63.50  | 0.15   | 0.31   | 0.08   |
| 3 | 30 | 4.91   | 9.51   | 1.05   | 36.65  | 0.03   |
| 4 | 4  | 0.00   | 0.00   | 0.00   | 0.00   | 0.00   |
| 4 | 5  | 90.46  | 26.44  | 54.23  | 0.83   | 73.59  |
| 4 | 6  | 10.15  | 17.81  | 25.18  | 0.17   | 3.66   |
| 4 | 7  | 165.51 | 69.42  | 6.51   | 30.84  | 77.69  |
| 4 | 8  | 21.34  | 36.02  | 30.00  | 20.39  | 57.72  |
| 4 | 9  | 5.65   | 20.36  | 1.00   | 14.47  | 36.08  |
| 4 | 10 | 22.42  | 54.42  | 1.34   | 93.91  | 0.36   |
| 4 | 11 | 142.75 | 101.03 | 0.46   | 76.22  | 144.21 |
| 4 | 12 | 1.28   | 55.65  | 43.07  | 101.37 | 0.41   |
| 4 | 13 | 0.44   | 42.13  | 34.44  | 81.29  | 69.02  |
| 4 | 14 | 6.24   | 12.33  | 1.35   | 7.09   | 20.53  |
| 4 | 15 | 41.88  | 42.80  | 0.24   | 41.47  | 0.14   |
| 4 | 16 | 21.42  | 39.75  | 0.11   | 54.31  | 87.91  |
| 4 | 17 | 12.44  | 27.42  | 0.10   | 38.31  | 46.42  |
| 4 | 18 | 5.07   | 0.16   | 0.71   | 43.10  | 92.61  |
| 4 | 19 | 26.08  | 92.31  | 0.06   | 18.18  | 100.92 |
| 4 | 20 | 2.85   | 0.53   | 0.08   | 53.28  | 17.03  |
| 4 | 21 | 36.39  | 49.10  | 0.26   | 0.00   | 73.93  |

|   |    |       |        |        |        |        |
|---|----|-------|--------|--------|--------|--------|
| 4 | 42 | 32.10 | 7.36   | 1.15   | 9.80   | 112.40 |
| 4 | 23 | 1.21  | 1.43   | 0.09   | 2.39   | 144.83 |
| 4 | 24 | 0.50  | 80.66  | 0.41   | 0.00   | 20.48  |
| 4 | 25 | 0.46  | 120.60 | 1.20   | 156.34 | 119.22 |
| 4 | 26 | 0.18  | 0.17   | 23.55  | 0.42   | 0.00   |
| 4 | 27 | 40.71 | 31.20  | 1.31   | 16.76  | 8.09   |
| 4 | 28 | 0.06  | 96.38  | 0.04   | 48.10  | 31.44  |
| 4 | 29 | 0.73  | 1.20   | 0.12   | 0.51   | 103.66 |
| 4 | 30 | 0.10  | 32.39  | 0.55   | 18.92  | 38.25  |
| 5 | 5  | 0.00  | 0.00   | 0.00   | 0.00   | 0.00   |
| 5 | 6  | 52.62 | 46.16  | 176.96 | 26.40  | 98.45  |
| 5 | 7  | 67.20 | 53.54  | 74.94  | 0.42   | 79.95  |
| 5 | 8  | 23.28 | 19.88  | 78.12  | 71.60  | 58.83  |
| 5 | 9  | 3.47  | 0.44   | 49.57  | 63.73  | 0.45   |
| 5 | 10 | 17.18 | 0.42   | 37.70  | 99.91  | 0.07   |
| 5 | 11 | 28.11 | 97.20  | 75.11  | 42.63  | 39.29  |
| 5 | 12 | 0.74  | 102.74 | 94.65  | 120.35 | 0.27   |
| 5 | 13 | 0.30  | 103.53 | 92.55  | 1.45   | 26.17  |
| 5 | 14 | 40.42 | 27.86  | 79.11  | 1.65   | 37.09  |
| 5 | 15 | 23.00 | 31.02  | 1.18   | 0.48   | 0.11   |
| 5 | 16 | 61.09 | 11.50  | 0.32   | 0.22   | 0.15   |
| 5 | 17 | 45.47 | 10.19  | 0.22   | 1.16   | 25.54  |
| 5 | 18 | 22.67 | 0.00   | 0.15   | 20.98  | 74.35  |
| 5 | 19 | 81.63 | 4.62   | 0.38   | 0.87   | 35.14  |
| 5 | 20 | 22.91 | 0.08   | 0.11   | 0.33   | 34.08  |
| 5 | 21 | 83.34 | 39.07  | 0.29   | 0.21   | 0.10   |
| 5 | 22 | 74.76 | 36.29  | 0.01   | 0.90   | 48.82  |
| 5 | 23 | 5.93  | 1.39   | 0.43   | 2.47   | 24.31  |
| 5 | 24 | 33.90 | 1.89   | 0.18   | 0.46   | 51.33  |
| 5 | 25 | 5.03  | 23.09  | 0.81   | 0.18   | 39.04  |
| 5 | 26 | 44.10 | 0.00   | 0.37   | 0.42   | 0.00   |
| 5 | 27 | 31.25 | 61.30  | 0.92   | 0.74   | 39.28  |
| 5 | 28 | 0.12  | 72.57  | 0.35   | 0.28   | 9.52   |
| 5 | 29 | 0.85  | 1.22   | 0.38   | 0.51   | 33.75  |
| 5 | 30 | 0.37  | 0.33   | 0.24   | 0.19   | 0.52   |
| 6 | 6  | 0.00  | 0.00   | 0.00   | 0.00   | 0.00   |
| 6 | 7  | 0.06  | 38.99  | 0.16   | 0.16   | 74.90  |
| 6 | 8  | 0.21  | 6.53   | 0.60   | 71.36  | 98.12  |
| 6 | 9  | 0.00  | 0.68   | 0.41   | 40.19  | 211.83 |
| 6 | 10 | 0.25  | 92.73  | 26.86  | 108.12 | 48.50  |
| 6 | 11 | 3.74  | 41.11  | 26.04  | 1.70   | 24.56  |
| 6 | 12 | 0.00  | 82.60  | 1.31   | 2.47   | 77.49  |
| 6 | 13 | 83.89 | 37.96  | 27.82  | 4.24   | 75.50  |
| 6 | 14 | 61.03 | 32.68  | 104.33 | 8.43   | 20.43  |



|   |    |        |        |        |       |        |
|---|----|--------|--------|--------|-------|--------|
| 6 | 15 | 69.21  | 20.12  | 24.27  | 1.70  | 1.78   |
| 6 | 16 | 7.58   | 1.72   | 1.05   | 1.88  | 46.97  |
| 6 | 17 | 52.89  | 81.08  | 0.49   | 0.81  | 36.73  |
| 6 | 18 | 3.36   | 0.35   | 0.21   | 0.55  | 176.33 |
| 6 | 19 | 0.81   | 6.07   | 0.33   | 0.08  | 173.34 |
| 6 | 20 | 0.75   | 0.89   | 0.06   | 0.10  | 37.54  |
| 6 | 21 | 1.74   | 43.60  | 0.15   | 0.23  | 4.07   |
| 6 | 22 | 51.98  | 7.14   | 0.29   | 0.54  | 2.93   |
| 6 | 23 | 46.71  | 1.38   | 0.45   | 0.23  | 30.39  |
| 6 | 24 | 1.41   | 37.54  | 0.27   | 1.77  | 93.23  |
| 6 | 25 | 18.49  | 40.02  | 1.00   | 0.30  | 31.54  |
| 6 | 26 | 31.68  | 1.45   | 89.29  | 0.85  | 0.00   |
| 6 | 27 | 79.23  | 0.36   | 1.32   | 1.24  | 64.31  |
| 6 | 28 | 0.00   | 38.59  | 0.10   | 0.72  | 31.11  |
| 6 | 29 | 2.21   | 0.44   | 0.63   | 1.01  | 21.18  |
| 6 | 30 | 0.00   | 0.63   | 0.40   | 0.27  | 0.27   |
| 7 | 7  | 0.00   | 0.00   | 0.00   | 0.00  | 0.00   |
| 7 | 8  | 96.77  | 54.26  | 14.58  | 75.71 | 88.39  |
| 7 | 9  | 2.56   | 35.41  | 65.56  | 59.76 | 120.89 |
| 7 | 10 | 146.00 | 69.94  | 0.42   | 42.59 | 78.22  |
| 7 | 11 | 1.00   | 125.83 | 74.93  | 76.47 | 4.66   |
| 7 | 12 | 0.38   | 3.75   | 65.24  | 21.36 | 77.80  |
| 7 | 13 | 0.44   | 34.70  | 206.22 | 5.27  | 39.67  |
| 7 | 14 | 0.47   | 49.53  | 34.35  | 28.85 | 54.87  |
| 7 | 15 | 1.77   | 55.90  | 65.47  | 2.62  | 2.12   |
| 7 | 16 | 0.59   | 40.00  | 0.16   | 0.30  | 0.43   |
| 7 | 17 | 0.52   | 46.75  | 0.27   | 37.66 | 24.18  |
| 7 | 18 | 0.39   | 0.14   | 0.40   | 0.39  | 63.76  |
| 7 | 19 | 3.85   | 17.80  | 0.00   | 18.32 | 144.03 |
| 7 | 20 | 3.71   | 27.93  | 0.26   | 8.03  | 51.52  |
| 7 | 21 | 4.37   | 15.92  | 0.65   | 0.00  | 37.37  |
| 7 | 22 | 2.73   | 0.88   | 0.03   | 0.67  | 86.68  |
| 7 | 23 | 1.63   | 13.31  | 0.14   | 1.45  | 75.23  |
| 7 | 24 | 0.02   | 1.03   | 0.23   | 0.00  | 53.58  |
| 7 | 25 | 0.07   | 52.85  | 0.79   | 57.98 | 58.12  |
| 7 | 26 | 0.13   | 0.64   | 0.28   | 1.75  | 0.00   |
| 7 | 27 | 0.12   | 13.68  | 0.33   | 31.35 | 40.61  |
| 7 | 28 | 0.52   | 50.40  | 0.00   | 5.61  | 22.97  |
| 7 | 29 | 0.13   | 0.69   | 0.30   | 44.75 | 4.86   |
| 7 | 30 | 0.00   | 37.95  | 0.09   | 96.52 | 0.36   |
| 8 | 8  | 0.00   | 0.00   | 0.00   | 0.00  | 0.00   |
| 8 | 9  | 1.72   | 0.68   | 75.36  | 40.99 | 127.70 |
| 8 | 10 | 34.62  | 60.83  | 70.44  | 64.50 | 43.82  |
| 8 | 11 | 161.98 | 55.28  | 18.48  | 48.88 | 46.00  |

|    |    |        |        |        |        |        |
|----|----|--------|--------|--------|--------|--------|
| 8  | 12 | 0.33   | 24.52  | 88.95  | 0.30   | 120.61 |
| 8  | 13 | 0.10   | 86.00  | 184.18 | 27.86  | 70.89  |
| 8  | 14 | 1.06   | 55.08  | 66.24  | 19.34  | 49.85  |
| 8  | 15 | 0.82   | 82.73  | 153.58 | 56.82  | 0.78   |
| 8  | 16 | 1.20   | 26.65  | 144.28 | 7.31   | 0.74   |
| 8  | 17 | 0.53   | 53.05  | 98.68  | 39.04  | 23.33  |
| 8  | 18 | 3.32   | 0.35   | 0.03   | 30.02  | 0.80   |
| 8  | 19 | 1.05   | 7.32   | 47.46  | 50.73  | 45.39  |
| 8  | 20 | 0.80   | 0.81   | 81.95  | 50.50  | 46.52  |
| 8  | 21 | 2.76   | 54.39  | 51.98  | 0.16   | 0.87   |
| 8  | 22 | 1.80   | 3.11   | 0.01   | 42.93  | 1.97   |
| 8  | 23 | 5.85   | 1.73   | 15.59  | 0.55   | 0.41   |
| 8  | 24 | 0.70   | 31.76  | 73.20  | 1.10   | 45.63  |
| 8  | 25 | 0.39   | 1.34   | 27.03  | 9.84   | 53.46  |
| 8  | 26 | 0.20   | 1.41   | 0.15   | 1.82   | 0.00   |
| 8  | 27 | 0.20   | 6.92   | 30.27  | 34.95  | 0.14   |
| 8  | 28 | 0.05   | 2.05   | 58.08  | 0.33   | 53.02  |
| 8  | 29 | 0.25   | 0.50   | 0.70   | 1.09   | 48.52  |
| 8  | 30 | 0.00   | 0.71   | 0.91   | 1.32   | 0.27   |
| 9  | 9  | 0.00   | 0.00   | 0.00   | 0.00   | 0.00   |
| 9  | 10 | 158.29 | 19.43  | 44.98  | 101.58 | 62.12  |
| 9  | 11 | 1.15   | 51.67  | 60.36  | 97.74  | 54.52  |
| 9  | 12 | 55.44  | 36.29  | 81.33  | 0.51   | 93.86  |
| 9  | 13 | 46.66  | 64.94  | 105.38 | 36.52  | 80.87  |
| 9  | 14 | 0.19   | 43.84  | 81.45  | 97.24  | 0.63   |
| 9  | 15 | 32.46  | 79.82  | 103.31 | 25.79  | 106.85 |
| 9  | 16 | 42.77  | 76.28  | 14.98  | 47.45  | 0.18   |
| 9  | 17 | 0.31   | 42.88  | 16.13  | 33.49  | 29.39  |
| 9  | 18 | 22.69  | 0.05   | 0.08   | 7.26   | 169.66 |
| 9  | 19 | 55.35  | 16.94  | 139.19 | 40.45  | 97.22  |
| 9  | 20 | 54.57  | 23.65  | 51.84  | 40.91  | 0.32   |
| 9  | 21 | 3.28   | 116.71 | 101.23 | 0.29   | 0.45   |
| 9  | 22 | 63.49  | 44.19  | 0.00   | 35.27  | 82.36  |
| 9  | 23 | 2.45   | 56.96  | 78.96  | 0.53   | 71.26  |
| 9  | 24 | 0.34   | 52.32  | 115.46 | 1.55   | 60.70  |
| 9  | 25 | 0.19   | 0.91   | 41.22  | 14.40  | 40.91  |
| 9  | 26 | 33.94  | 0.35   | 0.09   | 0.88   | 0.00   |
| 9  | 27 | 0.12   | 80.07  | 3.34   | 29.41  | 70.54  |
| 9  | 28 | 0.30   | 0.25   | 51.60  | 0.74   | 53.61  |
| 9  | 29 | 29.96  | 43.83  | 16.47  | 0.71   | 130.99 |
| 9  | 30 | 24.15  | 91.35  | 77.12  | 0.98   | 17.75  |
| 10 | 10 | 0.00   | 0.00   | 0.00   | 0.00   | 0.00   |
| 10 | 11 | 33.24  | 32.90  | 201.10 | 31.37  | 5.28   |
| 10 | 12 | 2.52   | 2.38   | 86.89  | 120.53 | 14.37  |

|    |    |       |        |        |        |        |
|----|----|-------|--------|--------|--------|--------|
| 10 | 13 | 96.94 | 65.24  | 23.74  | 21.64  | 42.65  |
| 10 | 14 | 25.52 | 9.73   | 167.80 | 70.72  | 0.12   |
| 10 | 15 | 1.18  | 88.12  | 22.41  | 19.96  | 36.33  |
| 10 | 16 | 24.25 | 1.14   | 0.57   | 2.56   | 121.42 |
| 10 | 17 | 46.02 | 1.71   | 1.63   | 26.92  | 63.37  |
| 10 | 18 | 22.77 | 0.40   | 9.93   | 28.06  | 61.57  |
| 10 | 19 | 41.50 | 2.55   | 0.01   | 6.46   | 24.50  |
| 10 | 20 | 12.33 | 37.13  | 0.02   | 39.96  | 0.80   |
| 10 | 21 | 69.14 | 9.84   | 0.11   | 0.16   | 12.71  |
| 10 | 22 | 57.65 | 10.60  | 0.20   | 31.57  | 31.36  |
| 10 | 23 | 0.91  | 3.41   | 0.15   | 26.61  | 0.16   |
| 10 | 24 | 0.23  | 1.19   | 0.07   | 0.59   | 27.07  |
| 10 | 25 | 26.94 | 0.62   | 0.62   | 30.47  | 0.02   |
| 10 | 26 | 62.66 | 1.40   | 1.48   | 44.20  | 0.00   |
| 10 | 27 | 0.19  | 0.37   | 0.88   | 86.87  | 0.21   |
| 10 | 28 | 0.21  | 0.15   | 0.08   | 39.83  | 0.25   |
| 10 | 29 | 26.27 | 0.16   | 0.03   | 41.64  | 0.21   |
| 10 | 30 | 0.42  | 36.46  | 0.33   | 35.05  | 0.29   |
| 11 | 11 | 0.00  | 0.00   | 0.00   | 0.00   | 0.00   |
| 11 | 12 | 0.22  | 95.52  | 59.83  | 0.14   | 34.75  |
| 11 | 13 | 23.24 | 13.51  | 3.35   | 63.59  | 33.82  |
| 11 | 14 | 5.98  | 198.09 | 21.19  | 6.62   | 0.67   |
| 11 | 15 | 25.92 | 8.04   | 132.63 | 2.53   | 0.44   |
| 11 | 16 | 60.53 | 31.65  | 16.24  | 2.64   | 23.29  |
| 11 | 17 | 11.86 | 19.55  | 25.99  | 0.57   | 103.78 |
| 11 | 18 | 24.55 | 0.24   | 3.79   | 2.28   | 1.56   |
| 11 | 19 | 39.10 | 125.64 | 95.27  | 92.43  | 52.68  |
| 11 | 20 | 64.54 | 4.35   | 40.49  | 31.00  | 1.66   |
| 11 | 21 | 27.27 | 19.68  | 125.19 | 0.03   | 1.53   |
| 11 | 22 | 39.17 | 6.68   | 0.08   | 13.71  | 42.05  |
| 11 | 23 | 52.58 | 29.34  | 32.86  | 41.00  | 44.50  |
| 11 | 24 | 9.39  | 21.50  | 28.54  | 0.24   | 51.63  |
| 11 | 25 | 38.04 | 40.84  | 91.14  | 94.08  | 1.01   |
| 11 | 26 | 40.80 | 0.73   | 0.31   | 86.52  | 0.00   |
| 11 | 27 | 7.81  | 39.43  | 32.11  | 42.52  | 87.26  |
| 11 | 28 | 0.04  | 0.78   | 0.26   | 109.49 | 48.98  |
| 11 | 29 | 21.09 | 0.85   | 0.30   | 84.57  | 0.45   |
| 11 | 30 | 0.38  | 25.00  | 37.96  | 15.36  | 0.54   |
| 12 | 12 | 0.00  | 0.00   | 0.00   | 0.00   | 0.00   |
| 12 | 13 | 0.00  | 66.29  | 8.10   | 55.41  | 38.15  |
| 12 | 14 | 0.38  | 58.42  | 10.32  | 26.03  | 32.48  |
| 12 | 15 | 0.24  | 20.37  | 40.36  | 20.98  | 7.95   |
| 12 | 16 | 91.21 | 24.13  | 81.35  | 1.31   | 31.29  |
| 12 | 17 | 0.49  | 12.03  | 66.33  | 42.85  | 49.77  |

|    |    |        |        |        |        |        |
|----|----|--------|--------|--------|--------|--------|
| 12 | 18 | 0.36   | 0.14   | 0.46   | 122.15 | 19.25  |
| 12 | 19 | 43.30  | 23.78  | 2.02   | 1.01   | 14.62  |
| 12 | 20 | 75.73  | 63.07  | 136.84 | 19.69  | 0.50   |
| 12 | 21 | 89.46  | 64.55  | 67.20  | 0.45   | 81.78  |
| 12 | 22 | 0.19   | 3.86   | 0.01   | 0.62   | 33.22  |
| 12 | 23 | 75.79  | 28.22  | 116.24 | 2.24   | 0.33   |
| 12 | 24 | 0.00   | 1.79   | 0.11   | 0.24   | 0.26   |
| 12 | 25 | 0.00   | 64.11  | 69.26  | 0.90   | 0.10   |
| 12 | 26 | 0.00   | 0.25   | 0.18   | 0.33   | 0.03   |
| 12 | 27 | 0.03   | 37.48  | 42.32  | 1.12   | 54.61  |
| 12 | 28 | 0.10   | 0.61   | 0.42   | 0.19   | 1.01   |
| 12 | 29 | 0.00   | 57.73  | 0.47   | 0.89   | 34.22  |
| 12 | 30 | 41.80  | 39.74  | 36.96  | 0.16   | 115.82 |
| 13 | 13 | 0.00   | 0.00   | 0.00   | 0.00   | 0.00   |
| 13 | 14 | 75.40  | 32.36  | 65.70  | 16.55  | 0.14   |
| 13 | 15 | 91.29  | 46.33  | 22.37  | 67.59  | 1.18   |
| 13 | 16 | 0.34   | 51.37  | 169.83 | 92.50  | 0.23   |
| 13 | 17 | 7.72   | 120.61 | 97.70  | 23.41  | 14.01  |
| 13 | 18 | 31.71  | 0.39   | 0.39   | 101.45 | 1.57   |
| 13 | 19 | 24.07  | 67.87  | 1.15   | 47.48  | 32.28  |
| 13 | 20 | 31.03  | 27.96  | 44.80  | 25.32  | 0.58   |
| 13 | 21 | 44.97  | 18.19  | 33.43  | 0.13   | 0.59   |
| 13 | 22 | 55.92  | 55.03  | 0.05   | 29.86  | 67.15  |
| 13 | 23 | 0.48   | 51.52  | 37.87  | 20.63  | 28.00  |
| 13 | 24 | 0.76   | 8.29   | 0.19   | 0.61   | 15.60  |
| 13 | 25 | 0.73   | 42.98  | 37.14  | 69.35  | 0.41   |
| 13 | 26 | 88.92  | 0.91   | 1.35   | 40.18  | 0.00   |
| 13 | 27 | 26.44  | 0.21   | 0.35   | 33.70  | 157.10 |
| 13 | 28 | 0.00   | 27.54  | 0.43   | 37.47  | 142.85 |
| 13 | 29 | 45.64  | 39.97  | 0.82   | 38.34  | 26.32  |
| 13 | 30 | 0.27   | 1.02   | 38.73  | 47.93  | 88.53  |
| 14 | 14 | 0.00   | 0.00   | 0.00   | 0.00   | 0.00   |
| 14 | 15 | 64.36  | 14.98  | 93.52  | 18.88  | 172.72 |
| 14 | 16 | 26.31  | 90.39  | 188.65 | 81.24  | 50.83  |
| 14 | 17 | 23.28  | 71.67  | 79.46  | 135.34 | 158.89 |
| 14 | 18 | 55.96  | 0.19   | 1.16   | 79.09  | 16.20  |
| 14 | 19 | 9.96   | 97.25  | 0.30   | 52.38  | 73.86  |
| 14 | 20 | 52.83  | 44.17  | 0.15   | 66.46  | 102.28 |
| 14 | 21 | 38.54  | 1.55   | 1.36   | 0.30   | 43.76  |
| 14 | 22 | 28.43  | 46.76  | 0.07   | 10.96  | 64.16  |
| 14 | 23 | 129.19 | 10.00  | 0.46   | 0.87   | 45.87  |
| 14 | 24 | 58.68  | 1.60   | 79.87  | 1.70   | 47.86  |
| 14 | 25 | 8.35   | 4.15   | 32.25  | 83.35  | 34.05  |
| 14 | 26 | 33.41  | 0.31   | 0.88   | 0.62   | 0.15   |

|    |    |        |        |        |        |        |
|----|----|--------|--------|--------|--------|--------|
| 14 | 27 | 3.36   | 12.50  | 35.66  | 35.03  | 0.20   |
| 14 | 28 | 0.05   | 60.75  | 0.58   | 0.86   | 33.52  |
| 14 | 29 | 97.00  | 0.52   | 0.57   | 0.85   | 31.56  |
| 14 | 30 | 0.11   | 41.59  | 0.19   | 25.96  | 0.16   |
| 15 | 15 | 0.00   | 0.00   | 0.00   | 0.00   | 0.00   |
| 15 | 16 | 16.13  | 22.03  | 190.59 | 57.54  | 0.35   |
| 15 | 17 | 123.98 | 48.23  | 89.35  | 36.71  | 159.35 |
| 15 | 18 | 158.50 | 0.30   | 0.23   | 57.14  | 88.84  |
| 15 | 19 | 6.12   | 65.02  | 48.97  | 1.30   | 72.55  |
| 15 | 20 | 98.00  | 43.77  | 51.18  | 7.78   | 1.40   |
| 15 | 21 | 41.73  | 60.61  | 131.65 | 0.04   | 1.01   |
| 15 | 22 | 18.37  | 74.08  | 0.02   | 6.16   | 35.95  |
| 15 | 23 | 18.13  | 3.62   | 31.20  | 73.25  | 0.12   |
| 15 | 24 | 42.30  | 31.23  | 79.41  | 0.17   | 0.23   |
| 15 | 25 | 30.66  | 18.95  | 30.43  | 0.66   | 0.06   |
| 15 | 26 | 15.77  | 2.35   | 0.22   | 26.29  | 0.15   |
| 15 | 27 | 0.86   | 34.51  | 33.13  | 56.12  | 0.42   |
| 15 | 28 | 0.03   | 23.31  | 40.06  | 70.92  | 0.34   |
| 15 | 29 | 31.74  | 60.80  | 0.47   | 21.38  | 0.23   |
| 15 | 30 | 0.52   | 0.80   | 0.13   | 39.91  | 0.55   |
| 16 | 16 | 0.00   | 0.00   | 0.00   | 0.00   | 0.00   |
| 16 | 17 | 54.81  | 107.51 | 129.44 | 59.53  | 191.84 |
| 16 | 18 | 34.47  | 0.40   | 0.22   | 16.98  | 49.52  |
| 16 | 19 | 47.87  | 15.92  | 22.92  | 56.93  | 42.12  |
| 16 | 20 | 36.81  | 27.29  | 55.44  | 30.48  | 157.31 |
| 16 | 21 | 47.95  | 72.20  | 141.92 | 0.36   | 91.56  |
| 16 | 22 | 3.65   | 1.19   | 0.00   | 0.65   | 59.20  |
| 16 | 23 | 27.32  | 121.34 | 24.15  | 0.20   | 42.45  |
| 16 | 24 | 0.62   | 3.28   | 77.09  | 1.50   | 45.28  |
| 16 | 25 | 0.33   | 22.74  | 23.99  | 42.96  | 0.35   |
| 16 | 26 | 46.17  | 2.20   | 0.00   | 1.57   | 1.16   |
| 16 | 27 | 29.91  | 25.18  | 13.86  | 0.64   | 0.08   |
| 16 | 28 | 0.35   | 11.45  | 102.32 | 0.61   | 0.31   |
| 16 | 29 | 0.16   | 41.72  | 42.77  | 0.73   | 0.72   |
| 16 | 30 | 28.00  | 1.45   | 38.68  | 0.23   | 0.07   |
| 17 | 17 | 0.00   | 0.00   | 0.00   | 0.00   | 0.00   |
| 17 | 18 | 40.15  | 0.01   | 158.70 | 119.60 | 1.41   |
| 17 | 19 | 29.19  | 4.94   | 70.62  | 131.41 | 106.85 |
| 17 | 20 | 105.56 | 0.54   | 6.78   | 71.45  | 44.27  |
| 17 | 21 | 44.53  | 46.10  | 37.99  | 0.13   | 2.04   |
| 17 | 22 | 1.12   | 76.83  | 0.04   | 59.58  | 106.25 |
| 17 | 23 | 11.67  | 25.55  | 30.27  | 0.34   | 50.27  |
| 17 | 24 | 1.92   | 44.28  | 89.97  | 0.59   | 61.98  |
| 17 | 25 | 20.24  | 1.63   | 80.29  | 2.43   | 72.96  |

|    |    |        |        |        |       |        |
|----|----|--------|--------|--------|-------|--------|
| 17 | 26 | 153.98 | 0.26   | 0.34   | 0.13  | 0.03   |
| 17 | 27 | 15.19  | 116.81 | 11.23  | 0.55  | 14.66  |
| 17 | 28 | 0.06   | 95.93  | 197.75 | 0.19  | 29.52  |
| 17 | 29 | 37.61  | 0.37   | 74.47  | 0.25  | 64.36  |
| 17 | 30 | 0.36   | 0.92   | 59.24  | 0.10  | 0.83   |
| 18 | 18 | 0.00   | 0.00   | 0.00   | 0.00  | 0.00   |
| 18 | 19 | 7.12   | 0.16   | 0.00   | 81.05 | 54.22  |
| 18 | 20 | 6.22   | 0.58   | 0.00   | 51.26 | 69.09  |
| 18 | 21 | 29.43  | 0.06   | 0.03   | 0.37  | 44.13  |
| 18 | 22 | 36.84  | 0.06   | 0.23   | 24.37 | 54.79  |
| 18 | 23 | 145.42 | 0.19   | 0.00   | 25.62 | 44.95  |
| 18 | 24 | 22.83  | 0.04   | 0.00   | 1.14  | 45.88  |
| 18 | 25 | 21.69  | 0.13   | 0.27   | 1.99  | 0.98   |
| 18 | 26 | 6.40   | 0.53   | 1.98   | 66.45 | 0.03   |
| 18 | 27 | 20.69  | 0.00   | 0.31   | 1.95  | 75.99  |
| 18 | 28 | 0.25   | 0.00   | 0.00   | 0.49  | 103.33 |
| 18 | 29 | 30.27  | 0.00   | 0.00   | 58.84 | 0.96   |
| 18 | 30 | 0.31   | 1.44   | 0.00   | 0.42  | 0.62   |
| 19 | 19 | 0.00   | 0.00   | 0.00   | 0.00  | 0.00   |
| 19 | 20 | 47.68  | 99.69  | 104.67 | 67.69 | 84.77  |
| 19 | 21 | 52.34  | 15.51  | 28.63  | 0.02  | 13.34  |
| 19 | 22 | 3.43   | 69.28  | 0.00   | 40.22 | 0.91   |
| 19 | 23 | 80.34  | 41.00  | 45.06  | 2.85  | 36.94  |
| 19 | 24 | 36.14  | 35.59  | 23.69  | 0.14  | 26.09  |
| 19 | 25 | 3.70   | 34.77  | 123.43 | 75.53 | 55.26  |
| 19 | 26 | 59.14  | 0.49   | 0.00   | 27.37 | 0.00   |
| 19 | 27 | 1.45   | 43.36  | 0.42   | 17.27 | 184.27 |
| 19 | 28 | 0.84   | 22.05  | 33.40  | 31.36 | 89.62  |
| 19 | 29 | 113.63 | 37.58  | 77.40  | 49.49 | 24.55  |
| 19 | 30 | 33.33  | 0.88   | 112.40 | 50.36 | 32.30  |
| 20 | 20 | 0.00   | 0.00   | 0.00   | 0.00  | 0.00   |
| 20 | 21 | 101.30 | 48.75  | 1.10   | 0.08  | 7.07   |
| 20 | 22 | 26.94  | 115.44 | 0.00   | 74.54 | 82.02  |
| 20 | 23 | 7.30   | 92.09  | 71.64  | 41.75 | 60.94  |
| 20 | 24 | 39.39  | 1.24   | 53.23  | 0.39  | 198.69 |
| 20 | 25 | 1.64   | 0.79   | 23.40  | 60.35 | 31.32  |
| 20 | 26 | 0.27   | 1.81   | 0.00   | 16.72 | 2.71   |
| 20 | 27 | 1.05   | 0.48   | 33.27  | 9.63  | 0.21   |
| 20 | 28 | 0.31   | 0.12   | 159.51 | 17.67 | 30.81  |
| 20 | 29 | 60.44  | 51.05  | 28.92  | 23.78 | 28.63  |
| 20 | 30 | 33.94  | 26.15  | 62.72  | 22.87 | 0.14   |
| 21 | 21 | 0.00   | 0.00   | 0.00   | 0.00  | 0.00   |
| 21 | 22 | 26.74  | 51.13  | 0.00   | 0.00  | 87.24  |
| 21 | 23 | 29.13  | 2.30   | 46.54  | 0.00  | 55.06  |

|    |    |        |        |        |        |        |
|----|----|--------|--------|--------|--------|--------|
| 21 | 24 | 1.32   | 117.98 | 27.19  | 0.88   | 159.48 |
| 21 | 25 | 53.16  | 5.02   | 81.99  | 0.00   | 0.26   |
| 21 | 26 | 0.56   | 0.11   | 0.00   | 0.00   | 2.90   |
| 21 | 27 | 1.85   | 64.62  | 75.56  | 0.00   | 0.17   |
| 21 | 28 | 0.88   | 22.25  | 16.37  | 0.00   | 0.26   |
| 21 | 29 | 106.16 | 47.63  | 50.58  | 0.00   | 0.41   |
| 21 | 30 | 34.41  | 13.82  | 1.58   | 0.00   | 0.14   |
| 22 | 22 | 0.00   | 0.00   | 0.00   | 0.00   | 0.00   |
| 22 | 23 | 76.37  | 84.02  | 0.00   | 18.45  | 36.61  |
| 22 | 24 | 1.87   | 30.98  | 0.00   | 0.00   | 3.25   |
| 22 | 25 | 70.20  | 27.61  | 0.12   | 59.26  | 31.57  |
| 22 | 26 | 45.47  | 0.35   | 0.46   | 28.24  | 0.00   |
| 22 | 27 | 18.29  | 52.93  | 0.16   | 70.67  | 4.41   |
| 22 | 28 | 0.39   | 37.88  | 0.00   | 11.68  | 31.97  |
| 22 | 29 | 79.52  | 76.92  | 0.00   | 88.27  | 15.67  |
| 22 | 30 | 0.20   | 11.04  | 0.04   | 58.67  | 50.16  |
| 23 | 23 | 0.00   | 0.00   | 0.00   | 0.00   | 0.00   |
| 23 | 24 | 51.83  | 93.95  | 57.66  | 0.00   | 19.78  |
| 23 | 25 | 4.71   | 68.53  | 70.88  | 0.34   | 81.06  |
| 23 | 26 | 34.92  | 0.58   | 0.00   | 18.95  | 0.08   |
| 23 | 27 | 0.31   | 35.76  | 0.83   | 120.68 | 1.82   |
| 23 | 28 | 0.71   | 84.98  | 50.22  | 95.71  | 152.86 |
| 23 | 29 | 28.56  | 91.78  | 55.23  | 0.48   | 90.59  |
| 23 | 30 | 0.83   | 15.48  | 57.32  | 37.51  | 5.00   |
| 24 | 24 | 0.00   | 0.00   | 0.00   | 0.00   | 0.00   |
| 24 | 25 | 121.60 | 19.28  | 43.91  | 0.00   | 1.24   |
| 24 | 26 | 35.77  | 0.11   | 0.00   | 0.00   | 0.17   |
| 24 | 27 | 59.77  | 11.86  | 29.30  | 0.00   | 21.18  |
| 24 | 28 | 0.03   | 51.74  | 162.98 | 0.00   | 68.99  |
| 24 | 29 | 52.82  | 107.37 | 40.62  | 0.00   | 90.31  |
| 24 | 30 | 0.23   | 27.15  | 67.93  | 0.00   | 1.06   |
| 25 | 25 | 0.00   | 0.00   | 0.00   | 0.00   | 0.00   |
| 25 | 26 | 47.25  | 185.37 | 0.43   | 0.14   | 0.00   |
| 25 | 27 | 106.16 | 12.44  | 45.85  | 0.72   | 154.74 |
| 25 | 28 | 0.07   | 12.55  | 41.25  | 0.61   | 23.21  |
| 25 | 29 | 76.69  | 32.20  | 6.80   | 0.24   | 84.38  |
| 25 | 30 | 0.16   | 0.28   | 115.11 | 0.56   | 15.41  |
| 26 | 26 | 0.00   | 0.00   | 0.00   | 0.00   | 0.00   |
| 26 | 27 | 44.73  | 0.00   | 0.74   | 203.48 | 0.00   |
| 26 | 28 | 0.07   | 0.00   | 0.03   | 23.66  | 0.00   |
| 26 | 29 | 113.60 | 0.00   | 0.03   | 100.31 | 0.00   |
| 26 | 30 | 0.00   | 0.00   | 0.57   | 147.52 | 0.00   |
| 27 | 27 | 0.00   | 0.00   | 0.00   | 0.00   | 0.00   |
| 27 | 28 | 0.15   | 81.34  | 45.05  | 15.95  | 28.34  |

|    |    |       |       |        |        |        |
|----|----|-------|-------|--------|--------|--------|
| 27 | 29 | 82.29 | 99.28 | 27.21  | 113.49 | 67.80  |
| 27 | 30 | 0.02  | 41.98 | 121.70 | 1.84   | 140.04 |
| 28 | 28 | 0.00  | 0.00  | 0.00   | 0.00   | 0.00   |
| 28 | 29 | 0.01  | 64.16 | 73.89  | 2.93   | 42.63  |
| 28 | 30 | 0.15  | 0.63  | 91.71  | 45.91  | 29.35  |
| 29 | 29 | 0.00  | 0.00  | 0.00   | 0.00   | 0.00   |
| 29 | 30 | 0.00  | 15.94 | 31.58  | 2.03   | 193.92 |
| 30 | 30 | 0.00  | 0.00  | 0.00   | 0.00   | 0.00   |

**Table S29.** The original TDM matrix elements between  $S_0$  and  $S_n$  calculated for I-Gaq<sub>3</sub>.

| States |       | TDM between $S_0$ and $S_n$ /debye |             |             |             |             |
|--------|-------|------------------------------------|-------------|-------------|-------------|-------------|
| $S_0$  | $S_n$ | Conformer 1                        | Conformer 2 | Conformer 3 | Conformer 4 | Conformer 5 |
| 0      | 1     | 0.46                               | 0.19        | 0.32        | 0.82        | 0.27        |
| 0      | 2     | 0.72                               | 0.55        | 0.10        | 0.67        | 0.23        |
| 0      | 3     | 0.61                               | 0.68        | 0.89        | 0.78        | 0.85        |
| 0      | 4     | 0.14                               | 0.10        | 0.70        | 0.15        | 0.49        |
| 0      | 5     | 0.77                               | 0.49        | 0.41        | 0.84        | 0.07        |
| 0      | 6     | 0.11                               | 0.26        | 0.30        | 0.65        | 0.61        |
| 0      | 7     | 0.60                               | 0.62        | 0.72        | 0.65        | 0.74        |
| 0      | 8     | 0.51                               | 0.48        | 0.66        | 0.32        | 0.72        |
| 0      | 9     | 0.42                               | 0.33        | 0.15        | 0.71        | 0.11        |
| 0      | 10    | 0.64                               | 0.72        | 0.37        | 1.65        | 0.42        |
| 0      | 11    | 0.77                               | 0.74        | 1.57        | 2.61        | 1.77        |
| 0      | 12    | 0.65                               | 0.48        | 1.63        | 1.12        | 1.63        |
| 0      | 13    | 1.08                               | 1.25        | 0.62        | 1.78        | 0.13        |
| 0      | 14    | 0.95                               | 1.29        | 0.44        | 1.21        | 1.02        |
| 0      | 15    | 1.44                               | 0.74        | 1.38        | 1.17        | 1.68        |
| 0      | 16    | 1.36                               | 1.22        | 1.38        | 1.73        | 1.70        |
| 0      | 17    | 1.51                               | 1.80        | 1.52        | 0.36        | 0.95        |
| 0      | 18    | 1.20                               | 0.58        | 1.97        | 0.58        | 1.26        |
| 0      | 19    | 1.48                               | 1.51        | 2.08        | 1.31        | 1.99        |
| 0      | 20    | 2.23                               | 2.45        | 1.12        | 1.13        | 1.05        |
| 0      | 21    | 1.06                               | 1.30        | 1.28        | 0.20        | 0.88        |
| 0      | 22    | 1.37                               | 1.64        | 1.21        | 1.58        | 1.95        |
| 0      | 23    | 0.48                               | 0.22        | 1.65        | 1.39        | 2.24        |
| 0      | 24    | 1.33                               | 1.27        | 1.70        | 1.24        | 1.37        |
| 0      | 25    | 1.69                               | 1.56        | 1.45        | 0.10        | 0.89        |
| 0      | 26    | 1.10                               | 1.02        | 0.90        | 1.27        | 0.87        |
| 0      | 27    | 0.19                               | 0.77        | 1.07        | 0.18        | 0.50        |
| 0      | 28    | 0.72                               | 0.10        | 0.26        | 1.01        | 1.09        |
| 0      | 29    | 1.16                               | 1.11        | 0.66        | 0.28        | 1.79        |
| 0      | 30    | 0.13                               | 1.68        | 1.89        | 0.74        | 0.90        |



**Table S30.** The original TDM matrix elements between  $T_i$  and  $T_j$  calculated for I-Gaq<sub>3</sub>

| States |       | TDM between $T_i$ and $T_j$ /debye |             |             |             |             |
|--------|-------|------------------------------------|-------------|-------------|-------------|-------------|
| $T_i$  | $T_j$ | Conformer 1                        | Conformer 2 | Conformer 3 | Conformer 4 | Conformer 5 |
| 1      | 1     | 0.00                               | 0.00        | 0.00        | 0.00        | 0.00        |
| 1      | 2     | 23.94                              | 0.39        | 0.24        | 0.22        | 0.42        |
| 1      | 3     | 0.31                               | 0.08        | 0.00        | 49.37       | 0.00        |
| 1      | 4     | 0.72                               | 0.73        | 0.00        | 0.04        | 0.00        |
| 1      | 5     | 0.06                               | 0.07        | 0.00        | 0.00        | 0.00        |
| 1      | 6     | 0.83                               | 0.38        | 0.49        | 51.04       | 0.73        |
| 1      | 7     | 1.33                               | 1.37        | 0.26        | 0.12        | 0.00        |
| 1      | 8     | 0.37                               | 0.06        | 0.00        | 27.70       | 0.28        |
| 1      | 9     | 0.11                               | 0.11        | 0.71        | 146.49      | 0.23        |
| 1      | 10    | 0.35                               | 0.28        | 1.17        | 0.22        | 0.69        |
| 1      | 11    | 0.23                               | 0.10        | 0.64        | 23.26       | 0.00        |
| 1      | 12    | 0.03                               | 0.10        | 0.15        | 48.76       | 0.61        |
| 1      | 13    | 0.30                               | 0.15        | 0.19        | 1.53        | 0.00        |
| 1      | 14    | 0.04                               | 0.00        | 0.22        | 93.01       | 0.68        |
| 1      | 15    | 0.00                               | 0.00        | 0.35        | 1.08        | 0.14        |
| 1      | 16    | 0.00                               | 0.00        | 111.60      | 0.50        | 0.22        |
| 1      | 17    | 121.21                             | 34.29       | 0.00        | 0.80        | 0.07        |
| 1      | 18    | 0.00                               | 0.00        | 0.00        | 0.24        | 0.20        |
| 1      | 19    | 0.80                               | 79.02       | 11.73       | 0.34        | 29.46       |
| 1      | 20    | 0.00                               | 39.74       | 0.23        | 0.69        | 159.76      |
| 1      | 21    | 66.96                              | 0.00        | 0.09        | 0.28        | 12.40       |
| 1      | 22    | 0.00                               | 0.00        | 0.18        | 0.08        | 92.38       |
| 1      | 23    | 0.00                               | 0.00        | 0.15        | 0.44        | 0.00        |
| 1      | 24    | 0.00                               | 0.00        | 0.00        | 0.06        | 0.13        |
| 1      | 25    | 0.06                               | 5.15        | 1.60        | 0.07        | 0.00        |
| 1      | 26    | 2.88                               | 0.15        | 0.00        | 0.04        | 0.11        |
| 1      | 27    | 0.47                               | 0.00        | 0.00        | 1.86        | 0.00        |
| 1      | 28    | 0.93                               | 0.00        | 0.00        | 46.39       | 0.00        |
| 1      | 29    | 0.48                               | 0.00        | 0.00        | 65.82       | 0.00        |
| 1      | 30    | 0.00                               | 0.54        | 0.00        | 0.23        | 0.00        |
| 2      | 2     | 0.00                               | 0.00        | 0.00        | 0.00        | 0.00        |
| 2      | 3     | 15.86                              | 112.87      | 0.00        | 0.23        | 0.00        |
| 2      | 4     | 0.10                               | 0.10        | 0.00        | 0.10        | 0.00        |
| 2      | 5     | 0.36                               | 0.52        | 0.00        | 0.00        | 0.00        |
| 2      | 6     | 0.03                               | 0.03        | 1.77        | 0.06        | 1.83        |
| 2      | 7     | 0.20                               | 0.11        | 0.45        | 0.08        | 0.00        |
| 2      | 8     | 0.63                               | 0.46        | 0.00        | 1.17        | 0.60        |
| 2      | 9     | 0.11                               | 0.17        | 0.60        | 73.11       | 0.59        |

|   |    |       |       |        |        |       |
|---|----|-------|-------|--------|--------|-------|
| 2 | 10 | 0.11  | 0.37  | 0.83   | 0.00   | 0.59  |
| 2 | 11 | 0.31  | 0.30  | 1.06   | 4.16   | 0.00  |
| 2 | 12 | 0.16  | 0.48  | 0.53   | 3.65   | 2.25  |
| 2 | 13 | 0.17  | 0.36  | 0.32   | 0.23   | 0.00  |
| 2 | 14 | 0.47  | 0.12  | 0.16   | 0.07   | 0.33  |
| 2 | 15 | 0.44  | 0.39  | 0.08   | 0.28   | 0.22  |
| 2 | 16 | 0.33  | 0.43  | 0.37   | 44.04  | 0.16  |
| 2 | 17 | 26.32 | 60.17 | 0.00   | 42.79  | 0.08  |
| 2 | 18 | 0.12  | 0.06  | 0.00   | 0.19   | 0.21  |
| 2 | 19 | 21.94 | 61.68 | 1.63   | 0.04   | 63.75 |
| 2 | 20 | 0.00  | 25.49 | 0.10   | 34.68  | 24.16 |
| 2 | 21 | 28.83 | 0.00  | 0.25   | 68.60  | 2.54  |
| 2 | 22 | 0.09  | 0.11  | 0.17   | 0.28   | 0.42  |
| 2 | 23 | 0.00  | 0.00  | 0.14   | 0.26   | 0.00  |
| 2 | 24 | 0.00  | 0.00  | 0.00   | 0.11   | 0.11  |
| 2 | 25 | 29.48 | 2.90  | 11.65  | 0.01   | 0.00  |
| 2 | 26 | 2.66  | 1.06  | 0.00   | 0.07   | 0.09  |
| 2 | 27 | 0.02  | 0.00  | 0.00   | 94.64  | 0.00  |
| 2 | 28 | 0.04  | 0.00  | 0.00   | 0.92   | 0.00  |
| 2 | 29 | 0.02  | 0.00  | 0.00   | 137.30 | 0.00  |
| 2 | 30 | 0.00  | 0.00  | 0.00   | 0.24   | 0.00  |
| 3 | 3  | 0.00  | 0.00  | 0.00   | 0.00   | 0.00  |
| 3 | 4  | 0.23  | 0.12  | 28.26  | 0.21   | 68.10 |
| 3 | 5  | 0.57  | 0.32  | 0.25   | 0.05   | 0.42  |
| 3 | 6  | 0.05  | 0.10  | 0.91   | 1.10   | 0.96  |
| 3 | 7  | 0.09  | 0.03  | 87.52  | 0.33   | 97.94 |
| 3 | 8  | 0.12  | 0.17  | 97.63  | 0.84   | 80.73 |
| 3 | 9  | 0.03  | 0.04  | 0.34   | 53.22  | 0.22  |
| 3 | 10 | 0.29  | 0.11  | 0.47   | 0.02   | 0.33  |
| 3 | 11 | 0.57  | 0.41  | 137.75 | 69.94  | 45.91 |
| 3 | 12 | 0.34  | 0.30  | 0.96   | 91.47  | 2.41  |
| 3 | 13 | 0.29  | 0.33  | 45.23  | 59.99  | 16.71 |
| 3 | 14 | 0.13  | 0.18  | 0.09   | 87.50  | 0.11  |
| 3 | 15 | 0.25  | 0.04  | 0.14   | 0.97   | 0.46  |
| 3 | 16 | 0.18  | 0.05  | 57.31  | 1.70   | 43.24 |
| 3 | 17 | 75.85 | 53.97 | 68.83  | 3.33   | 0.47  |
| 3 | 18 | 0.04  | 0.07  | 26.64  | 0.27   | 0.39  |
| 3 | 19 | 27.08 | 45.89 | 0.28   | 0.22   | 39.68 |
| 3 | 20 | 0.00  | 30.24 | 17.64  | 1.60   | 0.07  |
| 3 | 21 | 7.11  | 0.00  | 41.03  | 29.71  | 38.30 |
| 3 | 32 | 0.07  | 0.04  | 2.11   | 83.07  | 1.12  |
| 3 | 23 | 0.00  | 0.00  | 30.81  | 1.54   | 37.24 |
| 3 | 24 | 0.00  | 0.00  | 24.82  | 0.82   | 0.06  |
| 3 | 25 | 38.05 | 1.05  | 0.00   | 0.00   | 0.45  |

|   |    |        |        |        |        |        |
|---|----|--------|--------|--------|--------|--------|
| 3 | 26 | 1.13   | 17.09  | 15.95  | 0.10   | 23.93  |
| 3 | 27 | 0.01   | 0.00   | 0.42   | 91.56  | 0.50   |
| 3 | 28 | 0.03   | 0.00   | 10.58  | 2.17   | 44.47  |
| 3 | 29 | 0.01   | 0.00   | 16.05  | 105.91 | 61.59  |
| 3 | 30 | 0.00   | 0.03   | 47.79  | 0.02   | 82.01  |
| 4 | 4  | 0.00   | 0.00   | 0.00   | 0.00   | 0.00   |
| 4 | 5  | 22.67  | 25.59  | 29.49  | 39.80  | 4.54   |
| 4 | 6  | 4.84   | 15.79  | 0.01   | 0.91   | 0.03   |
| 4 | 7  | 1.19   | 58.72  | 0.23   | 27.40  | 29.69  |
| 4 | 8  | 0.99   | 0.99   | 15.91  | 0.00   | 0.35   |
| 4 | 9  | 37.51  | 58.76  | 0.34   | 0.47   | 0.17   |
| 4 | 10 | 69.19  | 75.24  | 0.07   | 0.39   | 0.20   |
| 4 | 11 | 131.03 | 126.38 | 0.25   | 2.34   | 40.63  |
| 4 | 12 | 20.55  | 3.95   | 43.03  | 0.48   | 0.09   |
| 4 | 13 | 0.66   | 1.03   | 1.06   | 0.48   | 0.48   |
| 4 | 14 | 1.13   | 0.74   | 0.19   | 87.44  | 0.11   |
| 4 | 15 | 0.42   | 0.57   | 0.82   | 46.01  | 25.12  |
| 4 | 16 | 0.22   | 0.33   | 0.24   | 99.25  | 2.25   |
| 4 | 17 | 0.26   | 0.48   | 49.34  | 71.97  | 109.61 |
| 4 | 18 | 29.25  | 32.55  | 106.74 | 12.22  | 88.02  |
| 4 | 19 | 0.84   | 0.59   | 0.00   | 33.14  | 123.56 |
| 4 | 20 | 56.27  | 0.21   | 90.85  | 0.56   | 0.07   |
| 4 | 21 | 0.20   | 53.98  | 13.26  | 0.27   | 61.28  |
| 4 | 42 | 0.19   | 0.19   | 45.77  | 2.03   | 21.14  |
| 4 | 23 | 30.59  | 0.43   | 108.08 | 127.58 | 0.12   |
| 4 | 24 | 0.39   | 0.29   | 119.88 | 108.22 | 1.13   |
| 4 | 25 | 0.07   | 0.06   | 0.00   | 0.34   | 37.33  |
| 4 | 26 | 0.08   | 0.02   | 50.12  | 1.50   | 38.50  |
| 4 | 27 | 0.98   | 0.47   | 0.46   | 38.28  | 10.36  |
| 4 | 28 | 39.41  | 27.64  | 67.17  | 50.33  | 14.73  |
| 4 | 29 | 0.74   | 0.05   | 147.90 | 0.90   | 88.51  |
| 4 | 30 | 0.18   | 26.79  | 92.69  | 25.03  | 51.36  |
| 5 | 5  | 0.00   | 0.00   | 0.00   | 0.00   | 0.00   |
| 5 | 6  | 134.27 | 124.76 | 0.15   | 49.79  | 0.10   |
| 5 | 7  | 0.52   | 0.33   | 46.18  | 149.81 | 81.83  |
| 5 | 8  | 2.89   | 20.83  | 168.37 | 0.00   | 23.13  |
| 5 | 9  | 0.42   | 0.41   | 0.25   | 0.10   | 0.18   |
| 5 | 10 | 45.56  | 15.58  | 0.21   | 1.14   | 0.11   |
| 5 | 11 | 17.52  | 35.20  | 57.32  | 45.21  | 63.22  |
| 5 | 12 | 89.17  | 109.08 | 67.30  | 0.29   | 0.04   |
| 5 | 13 | 45.10  | 77.59  | 52.62  | 0.19   | 39.24  |
| 5 | 14 | 96.28  | 68.09  | 0.07   | 60.63  | 0.15   |
| 5 | 15 | 0.43   | 0.94   | 0.46   | 91.29  | 62.49  |
| 5 | 16 | 0.35   | 1.07   | 0.30   | 101.74 | 9.00   |

|   |    |       |       |        |        |        |
|---|----|-------|-------|--------|--------|--------|
| 5 | 17 | 0.13  | 0.32  | 26.31  | 57.53  | 13.60  |
| 5 | 18 | 0.89  | 1.35  | 34.00  | 112.84 | 24.57  |
| 5 | 19 | 0.22  | 0.30  | 0.00   | 19.61  | 31.02  |
| 5 | 20 | 0.35  | 0.05  | 0.23   | 0.05   | 0.04   |
| 5 | 21 | 0.18  | 0.24  | 1.33   | 0.21   | 25.97  |
| 5 | 22 | 1.38  | 1.19  | 71.41  | 0.94   | 117.09 |
| 5 | 23 | 0.09  | 0.08  | 42.19  | 0.47   | 36.99  |
| 5 | 24 | 0.21  | 0.14  | 0.72   | 89.11  | 1.66   |
| 5 | 25 | 0.55  | 0.65  | 0.00   | 40.54  | 45.75  |
| 5 | 26 | 0.74  | 0.23  | 87.93  | 107.59 | 125.29 |
| 5 | 27 | 0.11  | 0.22  | 70.00  | 0.14   | 23.42  |
| 5 | 28 | 0.47  | 0.55  | 98.19  | 0.12   | 149.50 |
| 5 | 29 | 0.20  | 0.25  | 42.53  | 0.37   | 30.74  |
| 5 | 30 | 0.38  | 0.39  | 0.99   | 52.50  | 23.71  |
| 6 | 6  | 0.00  | 0.00  | 0.00   | 0.00   | 0.00   |
| 6 | 7  | 1.86  | 8.01  | 35.26  | 0.32   | 0.04   |
| 6 | 8  | 40.57 | 4.09  | 0.13   | 30.68  | 97.55  |
| 6 | 9  | 0.16  | 0.51  | 52.09  | 117.58 | 112.29 |
| 6 | 10 | 58.13 | 62.04 | 48.97  | 147.78 | 5.14   |
| 6 | 11 | 12.28 | 20.14 | 14.04  | 132.56 | 51.77  |
| 6 | 12 | 0.80  | 24.70 | 39.11  | 115.15 | 96.17  |
| 6 | 13 | 0.50  | 1.04  | 38.71  | 95.58  | 26.00  |
| 6 | 14 | 30.16 | 2.00  | 31.43  | 56.46  | 11.89  |
| 6 | 15 | 0.63  | 0.54  | 1.45   | 68.99  | 0.45   |
| 6 | 16 | 0.42  | 0.57  | 120.16 | 147.29 | 109.09 |
| 6 | 17 | 0.44  | 0.18  | 28.22  | 45.42  | 0.72   |
| 6 | 18 | 1.92  | 1.70  | 0.08   | 27.99  | 44.53  |
| 6 | 19 | 0.57  | 0.16  | 0.58   | 35.55  | 1.11   |
| 6 | 20 | 0.20  | 0.58  | 0.43   | 73.15  | 2.41   |
| 6 | 21 | 0.39  | 0.10  | 0.78   | 1.04   | 0.27   |
| 6 | 22 | 0.10  | 0.15  | 29.35  | 44.63  | 0.12   |
| 6 | 23 | 0.14  | 0.35  | 0.93   | 0.42   | 49.84  |
| 6 | 24 | 0.23  | 0.30  | 0.16   | 51.41  | 26.84  |
| 6 | 25 | 0.00  | 0.03  | 1.57   | 28.88  | 0.28   |
| 6 | 26 | 0.19  | 0.05  | 0.22   | 29.14  | 0.49   |
| 6 | 27 | 0.50  | 0.23  | 0.49   | 51.22  | 0.12   |
| 6 | 28 | 0.70  | 0.25  | 0.77   | 42.54  | 0.16   |
| 6 | 29 | 0.40  | 0.12  | 0.12   | 0.93   | 0.19   |
| 6 | 30 | 0.43  | 0.50  | 0.65   | 28.59  | 0.23   |
| 7 | 7  | 0.00  | 0.00  | 0.00   | 0.00   | 0.00   |
| 7 | 8  | 5.64  | 55.90 | 0.60   | 0.00   | 0.54   |
| 7 | 9  | 1.78  | 52.31 | 81.38  | 0.38   | 0.10   |
| 7 | 10 | 2.50  | 54.20 | 153.78 | 0.46   | 0.04   |
| 7 | 11 | 1.68  | 37.68 | 118.08 | 1.05   | 49.84  |

|   |    |        |        |        |        |        |
|---|----|--------|--------|--------|--------|--------|
| 7 | 12 | 1.78   | 62.17  | 18.42  | 0.47   | 0.13   |
| 7 | 13 | 6.12   | 71.30  | 55.82  | 0.84   | 0.42   |
| 7 | 14 | 0.00   | 0.52   | 126.67 | 116.99 | 0.16   |
| 7 | 15 | 2.30   | 1.19   | 0.00   | 63.41  | 11.64  |
| 7 | 16 | 1.66   | 1.29   | 32.98  | 30.75  | 74.01  |
| 7 | 17 | 0.77   | 0.62   | 87.78  | 109.66 | 7.38   |
| 7 | 18 | 0.15   | 0.46   | 0.22   | 2.42   | 81.65  |
| 7 | 19 | 0.20   | 0.56   | 0.44   | 9.96   | 54.22  |
| 7 | 20 | 0.00   | 0.26   | 49.96  | 0.37   | 0.09   |
| 7 | 21 | 0.43   | 0.14   | 43.77  | 0.31   | 8.95   |
| 7 | 22 | 0.67   | 0.57   | 113.19 | 0.36   | 21.61  |
| 7 | 23 | 1.73   | 1.74   | 23.28  | 133.34 | 0.21   |
| 7 | 24 | 0.00   | 0.05   | 0.09   | 81.86  | 1.77   |
| 7 | 25 | 0.04   | 0.14   | 0.40   | 0.63   | 54.11  |
| 7 | 26 | 0.58   | 0.01   | 0.31   | 93.57  | 86.90  |
| 7 | 27 | 0.17   | 0.05   | 46.18  | 0.25   | 97.67  |
| 7 | 28 | 0.33   | 0.16   | 31.19  | 0.54   | 107.46 |
| 7 | 29 | 0.16   | 0.08   | 29.77  | 27.59  | 29.34  |
| 7 | 30 | 0.16   | 0.25   | 12.42  | 43.75  | 73.08  |
| 8 | 8  | 0.00   | 0.00   | 0.00   | 0.00   | 0.00   |
| 8 | 9  | 4.97   | 38.74  | 0.09   | 19.63  | 139.45 |
| 8 | 10 | 31.65  | 19.81  | 0.18   | 0.03   | 161.28 |
| 8 | 11 | 60.31  | 142.04 | 0.62   | 9.73   | 3.25   |
| 8 | 12 | 35.17  | 15.79  | 59.70  | 1.36   | 54.89  |
| 8 | 13 | 106.49 | 104.43 | 40.65  | 139.76 | 32.44  |
| 8 | 14 | 42.84  | 112.41 | 0.25   | 22.55  | 101.44 |
| 8 | 15 | 177.20 | 170.66 | 0.38   | 1.79   | 37.55  |
| 8 | 16 | 16.95  | 48.41  | 0.59   | 0.97   | 31.29  |
| 8 | 17 | 0.04   | 0.31   | 18.55  | 0.99   | 35.33  |
| 8 | 18 | 1.18   | 41.59  | 6.60   | 0.65   | 79.09  |
| 8 | 19 | 0.16   | 0.27   | 0.02   | 0.53   | 44.72  |
| 8 | 20 | 99.51  | 0.04   | 95.48  | 5.44   | 0.74   |
| 8 | 21 | 0.27   | 69.20  | 24.83  | 0.16   | 36.16  |
| 8 | 22 | 77.82  | 52.79  | 33.12  | 0.00   | 0.80   |
| 8 | 23 | 26.52  | 22.36  | 59.07  | 0.49   | 5.11   |
| 8 | 24 | 0.55   | 20.89  | 33.10  | 0.04   | 159.33 |
| 8 | 25 | 0.09   | 0.86   | 0.00   | 0.02   | 0.51   |
| 8 | 26 | 0.87   | 0.10   | 17.34  | 0.09   | 0.97   |
| 8 | 27 | 0.35   | 0.64   | 1.78   | 1.13   | 29.98  |
| 8 | 28 | 0.85   | 1.37   | 61.55  | 0.69   | 65.00  |
| 8 | 29 | 29.06  | 0.48   | 10.94  | 1.11   | 40.67  |
| 8 | 30 | 0.13   | 54.57  | 3.44   | 0.06   | 22.41  |
| 9 | 9  | 0.00   | 0.00   | 0.00   | 0.00   | 0.00   |
| 9 | 10 | 38.14  | 13.39  | 111.82 | 1.51   | 33.86  |

|    |    |        |        |        |        |        |
|----|----|--------|--------|--------|--------|--------|
| 9  | 11 | 23.82  | 0.29   | 100.27 | 40.23  | 0.06   |
| 9  | 12 | 25.85  | 147.56 | 0.80   | 153.84 | 21.93  |
| 9  | 13 | 87.07  | 90.41  | 0.77   | 85.04  | 0.26   |
| 9  | 14 | 34.42  | 25.99  | 81.82  | 141.33 | 122.02 |
| 9  | 15 | 40.28  | 85.15  | 10.73  | 0.66   | 109.73 |
| 9  | 16 | 2.24   | 24.86  | 3.43   | 6.10   | 19.07  |
| 9  | 17 | 0.05   | 0.10   | 0.55   | 3.79   | 35.91  |
| 9  | 18 | 7.85   | 19.99  | 0.06   | 0.17   | 68.54  |
| 9  | 19 | 0.02   | 0.20   | 0.78   | 0.07   | 0.65   |
| 9  | 20 | 27.94  | 0.06   | 1.08   | 94.26  | 0.31   |
| 9  | 21 | 0.14   | 43.81  | 0.12   | 46.90  | 0.12   |
| 9  | 22 | 1.62   | 78.11  | 1.55   | 0.18   | 1.30   |
| 9  | 23 | 40.93  | 89.77  | 0.93   | 0.14   | 0.70   |
| 9  | 24 | 32.13  | 78.59  | 0.21   | 0.17   | 0.22   |
| 9  | 25 | 0.02   | 0.37   | 0.54   | 0.54   | 0.12   |
| 9  | 26 | 0.26   | 0.02   | 0.24   | 0.40   | 0.24   |
| 9  | 27 | 1.46   | 0.94   | 0.12   | 23.08  | 0.03   |
| 9  | 28 | 44.42  | 60.11  | 0.11   | 0.56   | 0.14   |
| 9  | 29 | 190.90 | 22.71  | 0.15   | 36.25  | 0.05   |
| 9  | 30 | 2.57   | 19.83  | 0.17   | 0.04   | 0.10   |
| 10 | 10 | 0.00   | 0.00   | 0.00   | 0.00   | 0.00   |
| 10 | 11 | 5.94   | 24.25  | 52.22  | 98.47  | 0.11   |
| 10 | 12 | 123.94 | 194.32 | 83.46  | 7.60   | 29.32  |
| 10 | 13 | 20.55  | 58.27  | 1.17   | 34.70  | 0.27   |
| 10 | 14 | 6.54   | 54.88  | 42.21  | 13.56  | 88.36  |
| 10 | 15 | 38.76  | 95.12  | 3.65   | 43.37  | 102.82 |
| 10 | 16 | 30.37  | 51.30  | 83.32  | 1.44   | 46.11  |
| 10 | 17 | 0.18   | 0.13   | 0.08   | 43.47  | 43.01  |
| 10 | 18 | 44.79  | 3.23   | 0.03   | 29.20  | 79.78  |
| 10 | 19 | 0.16   | 0.20   | 0.78   | 0.15   | 0.60   |
| 10 | 20 | 23.49  | 0.03   | 1.14   | 0.99   | 0.50   |
| 10 | 21 | 0.27   | 16.84  | 1.40   | 0.21   | 0.38   |
| 10 | 22 | 1.72   | 1.95   | 0.59   | 0.07   | 1.17   |
| 10 | 23 | 103.16 | 55.46  | 0.50   | 0.31   | 0.72   |
| 10 | 24 | 0.80   | 23.99  | 0.09   | 0.28   | 0.67   |
| 10 | 25 | 0.50   | 0.34   | 0.23   | 1.06   | 0.09   |
| 10 | 26 | 0.33   | 0.20   | 0.17   | 108.42 | 0.39   |
| 10 | 27 | 1.13   | 20.28  | 0.14   | 0.62   | 0.03   |
| 10 | 28 | 103.68 | 133.91 | 0.26   | 0.51   | 0.12   |
| 10 | 29 | 15.91  | 0.88   | 0.12   | 0.35   | 0.16   |
| 10 | 30 | 0.47   | 137.97 | 0.17   | 0.31   | 0.13   |
| 11 | 11 | 0.00   | 0.00   | 0.00   | 0.00   | 0.00   |
| 11 | 12 | 69.03  | 6.12   | 127.41 | 31.89  | 0.08   |
| 11 | 13 | 90.26  | 32.28  | 47.83  | 127.85 | 53.45  |

|    |    |        |        |        |        |        |
|----|----|--------|--------|--------|--------|--------|
| 11 | 14 | 11.93  | 98.15  | 77.41  | 78.46  | 0.02   |
| 11 | 15 | 30.15  | 42.01  | 107.09 | 129.17 | 0.22   |
| 11 | 16 | 23.28  | 44.91  | 8.51   | 25.00  | 68.99  |
| 11 | 17 | 0.29   | 0.18   | 22.60  | 67.89  | 3.93   |
| 11 | 18 | 27.44  | 37.57  | 0.21   | 129.47 | 68.25  |
| 11 | 19 | 0.06   | 0.35   | 67.92  | 37.32  | 0.28   |
| 11 | 20 | 0.46   | 0.18   | 26.81  | 23.42  | 0.00   |
| 11 | 21 | 0.40   | 0.37   | 29.93  | 29.80  | 0.55   |
| 11 | 22 | 0.23   | 0.11   | 66.76  | 38.27  | 0.67   |
| 11 | 23 | 0.13   | 0.03   | 47.04  | 1.56   | 20.73  |
| 11 | 24 | 1.09   | 0.85   | 0.24   | 46.42  | 41.97  |
| 11 | 25 | 0.40   | 0.52   | 1.91   | 23.66  | 0.38   |
| 11 | 26 | 0.93   | 0.31   | 38.99  | 0.72   | 0.60   |
| 11 | 27 | 0.56   | 0.56   | 0.07   | 9.09   | 101.52 |
| 11 | 28 | 0.80   | 1.00   | 71.28  | 0.90   | 76.98  |
| 11 | 29 | 0.56   | 0.42   | 37.25  | 54.25  | 0.79   |
| 11 | 30 | 0.73   | 0.10   | 10.16  | 25.17  | 44.44  |
| 12 | 12 | 0.00   | 0.00   | 0.00   | 0.00   | 0.00   |
| 12 | 13 | 37.78  | 28.05  | 39.26  | 57.91  | 0.29   |
| 12 | 14 | 65.42  | 49.54  | 1.20   | 132.48 | 18.00  |
| 12 | 15 | 35.26  | 54.41  | 0.83   | 85.67  | 35.99  |
| 12 | 16 | 12.92  | 3.02   | 37.11  | 37.42  | 6.03   |
| 12 | 17 | 0.13   | 0.14   | 1.06   | 56.49  | 9.67   |
| 12 | 18 | 46.75  | 20.65  | 14.43  | 157.55 | 31.90  |
| 12 | 19 | 0.07   | 0.14   | 30.54  | 36.24  | 3.42   |
| 12 | 20 | 53.17  | 0.05   | 40.95  | 10.17  | 31.45  |
| 12 | 21 | 0.22   | 27.73  | 86.02  | 19.51  | 41.34  |
| 12 | 22 | 108.27 | 10.69  | 44.15  | 0.38   | 4.71   |
| 12 | 23 | 102.02 | 6.67   | 0.91   | 33.30  | 0.32   |
| 12 | 24 | 72.91  | 84.31  | 0.49   | 0.33   | 58.07  |
| 12 | 25 | 0.41   | 0.33   | 0.66   | 1.17   | 0.05   |
| 12 | 26 | 0.08   | 0.22   | 0.22   | 33.79  | 48.72  |
| 12 | 27 | 1.21   | 1.08   | 0.62   | 1.60   | 0.05   |
| 12 | 28 | 94.99  | 127.27 | 66.24  | 1.24   | 0.12   |
| 12 | 29 | 29.85  | 38.62  | 97.27  | 45.03  | 0.16   |
| 12 | 30 | 34.37  | 39.31  | 0.41   | 0.85   | 0.47   |
| 13 | 13 | 0.00   | 0.00   | 0.00   | 0.00   | 0.00   |
| 13 | 14 | 54.28  | 62.38  | 1.19   | 21.71  | 0.06   |
| 13 | 15 | 53.22  | 3.61   | 0.52   | 122.84 | 0.01   |
| 13 | 16 | 56.13  | 18.18  | 32.04  | 74.89  | 80.27  |
| 13 | 17 | 0.30   | 0.42   | 112.89 | 133.15 | 0.86   |
| 13 | 18 | 59.63  | 89.13  | 0.85   | 45.44  | 34.95  |
| 13 | 19 | 0.06   | 0.60   | 33.10  | 42.87  | 0.15   |
| 13 | 20 | 24.02  | 0.21   | 70.44  | 56.56  | 0.00   |

|    |    |        |        |        |        |        |
|----|----|--------|--------|--------|--------|--------|
| 13 | 21 | 0.53   | 42.21  | 41.27  | 28.95  | 0.09   |
| 13 | 22 | 46.46  | 85.11  | 44.40  | 69.99  | 0.08   |
| 13 | 23 | 11.04  | 59.93  | 62.05  | 45.44  | 38.20  |
| 13 | 24 | 50.35  | 46.15  | 0.34   | 0.54   | 21.08  |
| 13 | 25 | 0.32   | 0.50   | 0.40   | 26.01  | 0.30   |
| 13 | 26 | 0.69   | 0.27   | 68.17  | 0.19   | 58.83  |
| 13 | 27 | 0.56   | 0.54   | 0.69   | 30.80  | 51.85  |
| 13 | 28 | 26.72  | 66.18  | 56.93  | 1.32   | 0.82   |
| 13 | 29 | 0.22   | 21.20  | 71.70  | 27.38  | 47.66  |
| 13 | 30 | 11.27  | 0.14   | 2.56   | 27.43  | 5.76   |
| 14 | 14 | 0.00   | 0.00   | 0.00   | 0.00   | 0.00   |
| 14 | 15 | 173.85 | 89.30  | 1.85   | 85.55  | 24.62  |
| 14 | 16 | 116.55 | 5.06   | 0.34   | 25.64  | 25.69  |
| 14 | 17 | 0.26   | 0.06   | 0.32   | 16.65  | 0.48   |
| 14 | 18 | 49.49  | 22.07  | 0.29   | 67.05  | 0.97   |
| 14 | 19 | 0.07   | 0.07   | 0.73   | 32.02  | 81.57  |
| 14 | 20 | 46.27  | 0.03   | 7.04   | 0.65   | 23.23  |
| 14 | 21 | 0.32   | 30.65  | 7.41   | 0.29   | 28.64  |
| 14 | 22 | 0.36   | 100.96 | 3.02   | 104.78 | 90.87  |
| 14 | 23 | 0.21   | 47.45  | 3.08   | 5.52   | 0.13   |
| 14 | 24 | 18.27  | 18.37  | 0.07   | 97.01  | 40.85  |
| 14 | 25 | 0.36   | 0.00   | 0.15   | 62.69  | 0.14   |
| 14 | 26 | 0.09   | 0.40   | 0.70   | 25.97  | 34.40  |
| 14 | 27 | 0.75   | 0.70   | 0.12   | 0.36   | 0.11   |
| 14 | 28 | 0.91   | 31.09  | 0.17   | 0.30   | 0.23   |
| 14 | 29 | 0.80   | 0.18   | 0.23   | 0.16   | 0.21   |
| 14 | 30 | 0.99   | 0.23   | 0.29   | 67.80  | 0.16   |
| 15 | 15 | 0.00   | 0.00   | 0.00   | 0.00   | 0.00   |
| 15 | 16 | 24.38  | 36.17  | 56.84  | 123.90 | 185.59 |
| 15 | 17 | 0.28   | 0.19   | 0.90   | 72.50  | 61.33  |
| 15 | 18 | 3.52   | 4.82   | 0.10   | 95.76  | 150.43 |
| 15 | 19 | 0.00   | 0.22   | 0.64   | 37.41  | 54.30  |
| 15 | 20 | 20.89  | 0.08   | 107.43 | 0.48   | 25.77  |
| 15 | 21 | 0.29   | 21.97  | 93.27  | 0.08   | 66.23  |
| 15 | 22 | 36.82  | 52.97  | 52.55  | 45.77  | 81.19  |
| 15 | 23 | 20.45  | 56.17  | 44.46  | 9.61   | 0.20   |
| 15 | 24 | 94.11  | 88.77  | 0.41   | 17.69  | 173.16 |
| 15 | 25 | 0.06   | 0.00   | 0.09   | 28.33  | 37.62  |
| 15 | 26 | 0.00   | 0.12   | 0.49   | 0.18   | 137.77 |
| 15 | 27 | 35.96  | 0.63   | 0.20   | 0.29   | 0.11   |
| 15 | 28 | 65.82  | 120.82 | 0.23   | 0.30   | 27.88  |
| 15 | 29 | 33.52  | 25.35  | 0.22   | 0.28   | 58.04  |
| 15 | 30 | 26.66  | 57.04  | 0.05   | 30.48  | 0.31   |
| 16 | 16 | 0.00   | 0.00   | 0.00   | 0.00   | 0.00   |



|    |    |        |       |        |        |        |
|----|----|--------|-------|--------|--------|--------|
| 16 | 17 | 0.21   | 0.21  | 34.00  | 14.88  | 57.61  |
| 16 | 18 | 45.54  | 24.36 | 0.17   | 35.10  | 106.54 |
| 16 | 19 | 0.00   | 0.24  | 7.81   | 72.36  | 15.54  |
| 16 | 20 | 29.24  | 0.09  | 23.93  | 83.11  | 26.53  |
| 16 | 21 | 0.22   | 20.80 | 5.82   | 0.70   | 21.82  |
| 16 | 22 | 33.25  | 63.73 | 90.52  | 1.38   | 77.89  |
| 16 | 23 | 20.68  | 46.42 | 114.02 | 72.37  | 103.17 |
| 16 | 24 | 60.11  | 64.81 | 0.18   | 76.07  | 82.98  |
| 16 | 25 | 0.05   | 0.00  | 0.93   | 1.13   | 97.04  |
| 16 | 26 | 0.00   | 0.13  | 0.47   | 78.33  | 59.64  |
| 16 | 27 | 42.09  | 0.49  | 0.13   | 0.99   | 41.69  |
| 16 | 28 | 61.70  | 10.99 | 0.54   | 0.53   | 21.68  |
| 16 | 29 | 12.57  | 29.57 | 0.52   | 25.98  | 30.57  |
| 16 | 30 | 6.39   | 50.47 | 42.47  | 0.39   | 48.57  |
| 17 | 17 | 0.00   | 0.00  | 0.00   | 0.00   | 0.00   |
| 17 | 18 | 0.05   | 0.03  | 24.66  | 1.84   | 95.00  |
| 17 | 19 | 0.84   | 24.10 | 0.00   | 119.15 | 139.74 |
| 17 | 20 | 0.00   | 23.80 | 37.74  | 21.39  | 0.06   |
| 17 | 21 | 10.31  | 0.00  | 1.91   | 47.71  | 97.80  |
| 17 | 22 | 0.06   | 0.05  | 96.82  | 1.56   | 30.04  |
| 17 | 23 | 0.00   | 0.00  | 6.78   | 0.79   | 0.75   |
| 17 | 24 | 0.00   | 0.00  | 51.64  | 109.98 | 119.95 |
| 17 | 25 | 0.09   | 41.66 | 0.00   | 0.45   | 2.17   |
| 17 | 26 | 2.84   | 0.20  | 29.21  | 79.75  | 111.37 |
| 17 | 27 | 0.07   | 0.00  | 57.52  | 34.06  | 46.54  |
| 17 | 28 | 0.16   | 0.00  | 135.44 | 1.63   | 167.44 |
| 17 | 29 | 0.08   | 0.00  | 14.85  | 45.65  | 0.56   |
| 17 | 30 | 0.00   | 0.31  | 40.89  | 0.33   | 35.15  |
| 18 | 18 | 0.00   | 0.00  | 0.00   | 0.00   | 0.00   |
| 18 | 19 | 0.00   | 0.03  | 0.02   | 47.55  | 5.86   |
| 18 | 20 | 29.76  | 0.01  | 0.34   | 0.71   | 0.30   |
| 18 | 21 | 0.05   | 4.38  | 24.07  | 0.08   | 7.39   |
| 18 | 22 | 67.90  | 97.82 | 1.04   | 37.06  | 19.75  |
| 18 | 23 | 24.24  | 38.21 | 68.64  | 103.66 | 65.10  |
| 18 | 24 | 0.96   | 8.54  | 68.23  | 36.94  | 36.27  |
| 18 | 25 | 0.14   | 0.00  | 0.00   | 22.67  | 3.75   |
| 18 | 26 | 0.00   | 0.17  | 62.56  | 0.35   | 1.71   |
| 18 | 27 | 42.47  | 48.07 | 34.46  | 0.33   | 19.77  |
| 18 | 28 | 98.41  | 20.25 | 27.87  | 0.13   | 52.87  |
| 18 | 29 | 107.18 | 0.86  | 150.47 | 18.88  | 62.43  |
| 18 | 30 | 34.36  | 58.61 | 2.44   | 5.60   | 43.96  |
| 19 | 19 | 0.00   | 0.00  | 0.00   | 0.00   | 0.00   |
| 19 | 20 | 0.00   | 30.78 | 26.10  | 0.02   | 216.94 |
| 19 | 21 | 1.10   | 0.00  | 57.56  | 51.33  | 67.23  |

|    |    |        |        |        |        |        |
|----|----|--------|--------|--------|--------|--------|
| 19 | 22 | 0.00   | 0.06   | 0.23   | 101.96 | 186.12 |
| 19 | 23 | 0.00   | 0.00   | 0.23   | 27.27  | 0.10   |
| 19 | 24 | 0.00   | 0.00   | 0.00   | 46.22  | 5.27   |
| 19 | 25 | 50.38  | 2.93   | 0.40   | 78.45  | 0.88   |
| 19 | 26 | 0.08   | 0.86   | 0.09   | 32.21  | 2.54   |
| 19 | 27 | 0.03   | 0.00   | 0.02   | 0.54   | 36.40  |
| 19 | 28 | 0.06   | 0.00   | 0.03   | 0.50   | 85.30  |
| 19 | 29 | 0.03   | 0.00   | 0.02   | 36.36  | 45.84  |
| 19 | 30 | 0.00   | 0.15   | 0.02   | 156.16 | 27.99  |
| 20 | 20 | 0.00   | 0.00   | 0.00   | 0.00   | 0.00   |
| 20 | 21 | 0.00   | 0.00   | 59.31  | 33.46  | 47.47  |
| 20 | 22 | 85.23  | 0.02   | 16.08  | 0.18   | 96.62  |
| 20 | 23 | 14.56  | 0.00   | 31.08  | 1.33   | 0.00   |
| 20 | 24 | 2.29   | 0.00   | 81.65  | 0.70   | 43.22  |
| 20 | 25 | 0.00   | 1.12   | 0.13   | 0.23   | 0.03   |
| 20 | 26 | 0.00   | 127.34 | 68.10  | 0.34   | 36.41  |
| 20 | 27 | 1.37   | 0.00   | 0.38   | 113.02 | 0.03   |
| 20 | 28 | 65.18  | 0.00   | 46.71  | 2.77   | 0.06   |
| 20 | 29 | 45.67  | 0.00   | 33.17  | 107.93 | 0.07   |
| 20 | 30 | 28.45  | 0.15   | 57.08  | 0.03   | 0.02   |
| 21 | 21 | 0.00   | 0.00   | 0.00   | 0.00   | 0.00   |
| 21 | 22 | 0.07   | 31.78  | 151.12 | 25.79  | 39.33  |
| 21 | 23 | 0.00   | 19.19  | 98.13  | 25.02  | 0.16   |
| 21 | 24 | 0.00   | 4.85   | 20.13  | 53.40  | 67.76  |
| 21 | 25 | 0.16   | 0.00   | 0.31   | 0.28   | 31.01  |
| 21 | 26 | 2.25   | 0.00   | 151.20 | 0.38   | 11.03  |
| 21 | 27 | 0.04   | 1.73   | 49.32  | 12.15  | 32.55  |
| 21 | 28 | 0.09   | 102.87 | 35.01  | 0.87   | 89.00  |
| 21 | 29 | 0.04   | 21.55  | 7.20   | 12.58  | 6.13   |
| 21 | 30 | 0.00   | 6.10   | 93.21  | 0.15   | 25.20  |
| 22 | 22 | 0.00   | 0.00   | 0.00   | 0.00   | 0.00   |
| 22 | 23 | 24.84  | 128.15 | 17.71  | 18.71  | 0.46   |
| 22 | 24 | 44.57  | 48.34  | 50.24  | 43.96  | 90.38  |
| 22 | 25 | 0.03   | 0.00   | 0.21   | 65.74  | 197.57 |
| 22 | 26 | 0.00   | 0.02   | 89.48  | 1.99   | 83.16  |
| 22 | 27 | 62.00  | 90.12  | 126.24 | 24.61  | 0.45   |
| 22 | 28 | 89.52  | 16.11  | 42.32  | 63.96  | 111.64 |
| 22 | 29 | 35.04  | 96.23  | 101.04 | 0.66   | 68.91  |
| 22 | 30 | 83.39  | 31.35  | 43.84  | 38.81  | 51.58  |
| 23 | 23 | 0.00   | 0.00   | 0.00   | 0.00   | 0.00   |
| 23 | 24 | 0.62   | 0.61   | 87.24  | 94.47  | 40.56  |
| 23 | 25 | 0.00   | 0.00   | 0.18   | 92.38  | 0.47   |
| 23 | 26 | 0.00   | 0.00   | 135.18 | 0.71   | 46.55  |
| 23 | 27 | 102.11 | 0.26   | 20.87  | 45.76  | 48.83  |

|    |    |        |        |        |        |        |
|----|----|--------|--------|--------|--------|--------|
| 23 | 28 | 7.43   | 63.78  | 33.93  | 56.67  | 17.69  |
| 23 | 29 | 75.76  | 1.48   | 48.62  | 13.84  | 64.61  |
| 23 | 30 | 0.94   | 70.70  | 32.65  | 46.27  | 30.00  |
| 24 | 24 | 0.00   | 0.00   | 0.00   | 0.00   | 0.00   |
| 24 | 25 | 0.00   | 0.00   | 0.00   | 109.06 | 82.20  |
| 24 | 26 | 0.00   | 0.00   | 78.62  | 85.96  | 81.53  |
| 24 | 27 | 70.85  | 24.28  | 7.00   | 91.66  | 63.04  |
| 24 | 28 | 42.73  | 67.14  | 92.23  | 119.02 | 11.09  |
| 24 | 29 | 43.75  | 39.36  | 42.00  | 28.43  | 95.07  |
| 24 | 30 | 27.66  | 11.55  | 205.62 | 23.61  | 19.45  |
| 25 | 25 | 0.00   | 0.00   | 0.00   | 0.00   | 0.00   |
| 25 | 26 | 0.48   | 0.49   | 0.00   | 120.30 | 28.47  |
| 25 | 27 | 0.01   | 0.00   | 0.00   | 48.26  | 121.14 |
| 25 | 28 | 0.01   | 0.00   | 0.00   | 62.13  | 71.11  |
| 25 | 29 | 0.01   | 0.00   | 0.00   | 0.14   | 0.24   |
| 25 | 30 | 0.00   | 0.17   | 0.00   | 23.46  | 93.64  |
| 26 | 26 | 0.00   | 0.00   | 0.00   | 0.00   | 0.00   |
| 26 | 27 | 0.22   | 0.00   | 89.51  | 0.49   | 10.77  |
| 26 | 28 | 0.43   | 0.00   | 68.88  | 0.55   | 50.73  |
| 26 | 29 | 0.22   | 0.00   | 3.43   | 0.14   | 62.98  |
| 26 | 30 | 0.00   | 0.00   | 91.77  | 0.23   | 29.20  |
| 27 | 27 | 0.00   | 0.00   | 0.00   | 0.00   | 0.00   |
| 27 | 28 | 152.68 | 85.50  | 90.30  | 156.12 | 45.08  |
| 27 | 29 | 51.88  | 113.36 | 39.86  | 125.89 | 55.23  |
| 27 | 30 | 87.40  | 148.71 | 37.85  | 25.98  | 87.80  |
| 28 | 28 | 0.00   | 0.00   | 0.00   | 0.00   | 0.00   |
| 28 | 29 | 17.07  | 98.70  | 20.41  | 185.88 | 21.36  |
| 28 | 30 | 23.59  | 1.92   | 5.74   | 26.47  | 45.07  |
| 29 | 29 | 0.00   | 0.00   | 0.00   | 0.00   | 0.00   |
| 29 | 30 | 83.82  | 32.40  | 58.49  | 49.59  | 17.19  |
| 30 | 30 | 0.00   | 0.00   | 0.00   | 0.00   | 0.00   |

**Table S31.** The original TDM matrix elements between  $S_0$  and  $S_n$  calculated for I-Al(qBr<sub>2</sub>)<sub>3</sub>.

| States |       | TDM elements between $S_0$ and $S_n$ /debyee |             |             |             |             |
|--------|-------|----------------------------------------------|-------------|-------------|-------------|-------------|
| $S_0$  | $S_n$ | Conformer 1                                  | Conformer 2 | Conformer 3 | Conformer 4 | Conformer 5 |
| 0      | 1     | 0.43                                         | 0.12        | 0.29        | 0.56        | 0.05        |
| 0      | 2     | 0.62                                         | 0.59        | 0.26        | 0.40        | 0.09        |
| 0      | 3     | 0.05                                         | 0.06        | 0.12        | 0.20        | 0.03        |
| 0      | 4     | 0.40                                         | 0.11        | 0.15        | 0.68        | 0.15        |
| 0      | 5     | 0.14                                         | 0.55        | 0.09        | 1.50        | 0.07        |
| 0      | 6     | 0.60                                         | 0.62        | 0.25        | 0.18        | 0.20        |
| 0      | 7     | 0.58                                         | 0.63        | 0.25        | 0.38        | 0.46        |

|   |    |      |      |      |      |      |
|---|----|------|------|------|------|------|
| 0 | 8  | 0.06 | 0.71 | 0.33 | 1.50 | 0.39 |
| 0 | 9  | 0.09 | 0.39 | 0.10 | 0.83 | 0.58 |
| 0 | 10 | 1.09 | 0.86 | 1.33 | 1.82 | 0.44 |
| 0 | 11 | 0.85 | 0.88 | 1.58 | 1.89 | 0.92 |
| 0 | 12 | 1.59 | 1.87 | 0.94 | 0.49 | 0.80 |
| 0 | 13 | 0.24 | 0.80 | 0.96 | 1.02 | 2.28 |
| 0 | 14 | 0.47 | 1.87 | 2.39 | 0.70 | 1.20 |
| 0 | 15 | 1.04 | 0.84 | 0.44 | 0.68 | 0.44 |
| 0 | 16 | 2.22 | 0.87 | 1.69 | 0.43 | 1.53 |
| 0 | 17 | 2.11 | 0.64 | 1.17 | 0.55 | 1.11 |
| 0 | 18 | 0.80 | 1.51 | 0.86 | 2.01 | 0.80 |
| 0 | 19 | 0.51 | 1.70 | 1.51 | 0.14 | 0.65 |
| 0 | 20 | 1.44 | 1.67 | 1.49 | 0.93 | 0.30 |
| 0 | 21 | 1.51 | 2.12 | 0.23 | 0.82 | 1.15 |
| 0 | 22 | 2.09 | 2.28 | 1.11 | 1.15 | 0.18 |
| 0 | 23 | 0.14 | 0.26 | 0.86 | 0.79 | 0.11 |
| 0 | 24 | 0.09 | 1.09 | 0.87 | 1.33 | 0.80 |
| 0 | 25 | 0.33 | 1.78 | 1.99 | 2.42 | 1.44 |
| 0 | 26 | 2.01 | 1.50 | 0.17 | 1.01 | 0.77 |
| 0 | 27 | 1.61 | 0.81 | 1.35 | 0.47 | 2.11 |
| 0 | 28 | 0.89 | 0.82 | 0.58 | 0.84 | 1.30 |
| 0 | 29 | 0.40 | 0.39 | 1.49 | 0.87 | 0.94 |
| 0 | 30 | 0.10 | 0.66 | 0.20 | 0.43 | 0.05 |

**Table S32.** The original TDM matrix elements between  $T_i$  and  $T_j$  calculated for I-Al(qBr<sub>2</sub>)<sub>3</sub>.

| States |       | TDM elements between $T_i$ and $T_j$ /debyee |             |             |             |             |
|--------|-------|----------------------------------------------|-------------|-------------|-------------|-------------|
| $T_i$  | $T_j$ | Conformer 1                                  | Conformer 2 | Conformer 3 | Conformer 4 | Conformer 5 |
| 1      | 1     | 0.00                                         | 0.00        | 0.00        | 0.00        | 0.00        |
| 1      | 2     | 18.64                                        | 0.46        | 25.46       | 0.00        | 5.50        |
| 1      | 3     | 81.27                                        | 0.09        | 99.56       | 0.24        | 0.00        |
| 1      | 4     | 59.22                                        | 0.38        | 62.29       | 0.22        | 0.08        |
| 1      | 5     | 42.63                                        | 0.36        | 83.40       | 0.00        | 4.24        |
| 1      | 6     | 46.29                                        | 0.25        | 34.37       | 0.00        | 2.16        |
| 1      | 7     | 2.32                                         | 0.21        | 46.36       | 0.00        | 10.46       |
| 1      | 8     | 0.89                                         | 0.90        | 0.37        | 0.16        | 0.33        |
| 1      | 9     | 85.86                                        | 0.20        | 94.47       | 0.11        | 1.54        |
| 1      | 10    | 121.06                                       | 0.08        | 79.12       | 0.63        | 0.00        |
| 1      | 11    | 0.39                                         | 0.15        | 0.61        | 0.46        | 0.77        |
| 1      | 12    | 0.64                                         | 0.00        | 110.81      | 0.37        | 0.55        |
| 1      | 13    | 67.33                                        | 0.06        | 68.92       | 1.18        | 0.05        |
| 1      | 14    | 0.05                                         | 0.00        | 0.16        | 129.87      | 0.06        |
| 1      | 15    | 0.02                                         | 0.16        | 0.12        | 1.43        | 0.04        |

|   |    |        |        |        |        |      |
|---|----|--------|--------|--------|--------|------|
| 1 | 16 | 0.23   | 0.46   | 0.02   | 112.70 | 0.06 |
| 1 | 17 | 26.63  | 0.36   | 23.20  | 102.36 | 0.07 |
| 1 | 18 | 0.02   | 0.00   | 0.03   | 0.03   | 2.08 |
| 1 | 19 | 6.92   | 30.81  | 3.74   | 0.00   | 0.00 |
| 1 | 20 | 0.55   | 0.00   | 0.06   | 0.17   | 0.02 |
| 1 | 21 | 1.31   | 0.00   | 0.29   | 15.92  | 0.19 |
| 1 | 22 | 1.69   | 1.81   | 0.38   | 24.33  | 0.04 |
| 1 | 23 | 0.20   | 0.00   | 3.12   | 0.00   | 0.03 |
| 1 | 24 | 0.02   | 0.00   | 0.09   | 171.22 | 0.05 |
| 1 | 25 | 0.98   | 0.00   | 0.18   | 0.00   | 0.04 |
| 1 | 26 | 0.50   | 0.10   | 0.11   | 3.37   | 0.04 |
| 1 | 27 | 1.12   | 0.03   | 0.22   | 0.00   | 2.16 |
| 1 | 28 | 162.31 | 0.45   | 1.21   | 0.58   | 0.92 |
| 1 | 29 | 0.06   | 0.00   | 0.54   | 0.62   | 0.21 |
| 1 | 30 | 1.38   | 0.00   | 0.40   | 0.00   | 0.21 |
| 2 | 2  | 0.00   | 0.00   | 0.00   | 0.00   | 0.00 |
| 2 | 3  | 35.80  | 28.06  | 10.64  | 0.45   | 0.00 |
| 2 | 4  | 0.03   | 0.16   | 0.73   | 0.49   | 0.06 |
| 2 | 5  | 165.90 | 0.27   | 215.23 | 1.60   | 3.04 |
| 2 | 6  | 11.86  | 0.39   | 110.70 | 0.57   | 1.38 |
| 2 | 7  | 0.19   | 0.06   | 3.15   | 0.10   | 0.24 |
| 2 | 8  | 63.21  | 233.58 | 42.66  | 0.43   | 9.90 |
| 2 | 9  | 139.14 | 40.87  | 183.46 | 0.39   | 2.98 |
| 2 | 10 | 15.53  | 0.12   | 2.22   | 1.87   | 0.00 |
| 2 | 11 | 36.48  | 0.27   | 48.69  | 1.67   | 0.92 |
| 2 | 12 | 68.81  | 0.00   | 2.16   | 1.54   | 0.55 |
| 2 | 13 | 0.61   | 0.02   | 21.36  | 1.69   | 0.20 |
| 2 | 14 | 0.26   | 0.00   | 0.16   | 0.46   | 0.01 |
| 2 | 15 | 0.12   | 36.25  | 0.10   | 0.72   | 0.04 |
| 2 | 16 | 0.04   | 140.91 | 0.08   | 0.10   | 0.02 |
| 2 | 17 | 0.20   | 107.78 | 96.84  | 0.18   | 0.06 |
| 2 | 18 | 0.06   | 0.00   | 0.05   | 0.07   | 2.53 |
| 2 | 19 | 0.03   | 1.91   | 1.55   | 0.00   | 0.02 |
| 2 | 20 | 0.30   | 0.00   | 0.05   | 0.13   | 0.07 |
| 2 | 21 | 0.44   | 0.00   | 0.28   | 0.07   | 0.19 |
| 2 | 22 | 1.27   | 15.58  | 0.16   | 0.12   | 0.06 |
| 2 | 23 | 0.09   | 0.00   | 0.72   | 0.00   | 0.03 |
| 2 | 24 | 0.10   | 0.00   | 0.04   | 45.24  | 0.03 |
| 2 | 25 | 0.23   | 0.00   | 0.47   | 0.00   | 0.02 |
| 2 | 26 | 0.08   | 1.43   | 0.20   | 55.37  | 0.04 |
| 2 | 27 | 0.03   | 0.33   | 0.37   | 0.00   | 2.18 |
| 2 | 28 | 0.02   | 0.00   | 41.37  | 29.72  | 0.06 |
| 2 | 29 | 0.43   | 0.00   | 52.27  | 0.12   | 0.05 |
| 2 | 30 | 0.28   | 0.10   | 0.85   | 0.00   | 0.74 |

|   |    |        |        |        |        |       |
|---|----|--------|--------|--------|--------|-------|
| 3 | 3  | 0.00   | 0.00   | 0.00   | 0.00   | 0.00  |
| 3 | 4  | 26.79  | 0.04   | 0.00   | 21.45  | 0.03  |
| 3 | 5  | 21.82  | 0.16   | 0.39   | 250.53 | 0.00  |
| 3 | 6  | 64.23  | 0.14   | 50.48  | 96.37  | 38.18 |
| 3 | 7  | 1.04   | 0.20   | 0.66   | 29.33  | 0.08  |
| 3 | 8  | 0.94   | 0.83   | 0.13   | 95.85  | 0.21  |
| 3 | 9  | 95.82  | 0.68   | 37.85  | 39.29  | 0.65  |
| 3 | 10 | 57.74  | 44.12  | 0.50   | 115.05 | 0.04  |
| 3 | 11 | 0.52   | 0.57   | 0.18   | 87.78  | 0.18  |
| 3 | 12 | 0.60   | 0.13   | 0.65   | 111.12 | 0.73  |
| 3 | 13 | 24.11  | 114.38 | 1.03   | 21.76  | 0.29  |
| 3 | 14 | 0.07   | 139.71 | 0.03   | 203.67 | 0.00  |
| 3 | 15 | 0.03   | 54.91  | 0.02   | 22.70  | 16.00 |
| 3 | 16 | 0.15   | 145.89 | 0.01   | 53.64  | 0.00  |
| 3 | 17 | 28.16  | 12.04  | 0.51   | 181.87 | 0.00  |
| 3 | 18 | 0.02   | 42.87  | 0.02   | 75.95  | 0.08  |
| 3 | 19 | 61.23  | 0.14   | 2.25   | 0.17   | 0.00  |
| 3 | 20 | 0.85   | 0.04   | 0.01   | 91.22  | 0.00  |
| 3 | 21 | 1.39   | 0.06   | 0.06   | 27.98  | 0.36  |
| 3 | 32 | 2.88   | 0.41   | 1.16   | 38.90  | 0.00  |
| 3 | 23 | 0.10   | 0.33   | 2.24   | 0.22   | 0.00  |
| 3 | 24 | 0.03   | 0.05   | 0.01   | 0.29   | 0.05  |
| 3 | 25 | 0.63   | 0.03   | 1.53   | 0.13   | 0.00  |
| 3 | 26 | 0.57   | 0.00   | 0.04   | 48.92  | 1.49  |
| 3 | 27 | 0.39   | 0.02   | 0.06   | 0.08   | 0.00  |
| 3 | 28 | 103.81 | 0.00   | 158.10 | 118.47 | 0.07  |
| 3 | 29 | 0.08   | 0.04   | 41.63  | 103.98 | 1.42  |
| 3 | 30 | 0.42   | 0.58   | 55.29  | 0.23   | 0.51  |
| 4 | 4  | 0.00   | 0.00   | 0.00   | 0.00   | 0.00  |
| 4 | 5  | 47.37  | 16.88  | 0.00   | 3.80   | 0.12  |
| 4 | 6  | 0.03   | 120.78 | 0.20   | 166.85 | 0.73  |
| 4 | 7  | 0.11   | 10.29  | 0.20   | 113.63 | 0.04  |
| 4 | 8  | 0.07   | 0.94   | 0.12   | 1.68   | 0.03  |
| 4 | 9  | 0.16   | 0.66   | 0.08   | 26.64  | 0.01  |
| 4 | 10 | 0.06   | 4.06   | 0.33   | 33.89  | 0.06  |
| 4 | 11 | 0.07   | 0.98   | 0.07   | 32.26  | 0.00  |
| 4 | 12 | 0.05   | 0.15   | 0.07   | 70.97  | 0.16  |
| 4 | 13 | 0.32   | 1.16   | 0.24   | 35.02  | 0.00  |
| 4 | 14 | 0.00   | 0.48   | 0.00   | 2.92   | 0.00  |
| 4 | 15 | 0.00   | 0.22   | 0.00   | 46.18  | 0.63  |
| 4 | 16 | 0.01   | 0.05   | 0.00   | 0.57   | 0.00  |
| 4 | 17 | 57.64  | 0.42   | 49.10  | 1.18   | 0.00  |
| 4 | 18 | 0.00   | 0.17   | 0.00   | 53.12  | 0.38  |
| 4 | 19 | 15.43  | 0.27   | 217.76 | 36.90  | 0.00  |

|   |    |        |       |        |        |        |
|---|----|--------|-------|--------|--------|--------|
| 4 | 20 | 0.20   | 0.03  | 0.00   | 28.75  | 0.00   |
| 4 | 21 | 0.26   | 0.44  | 0.00   | 0.83   | 3.29   |
| 4 | 42 | 0.44   | 0.11  | 0.00   | 0.76   | 0.00   |
| 4 | 23 | 0.00   | 0.06  | 0.00   | 27.46  | 0.00   |
| 4 | 24 | 0.00   | 0.02  | 0.00   | 0.08   | 27.42  |
| 4 | 25 | 6.22   | 0.15  | 2.45   | 37.53  | 0.00   |
| 4 | 26 | 120.61 | 1.51  | 0.00   | 100.06 | 0.84   |
| 4 | 27 | 45.63  | 0.35  | 0.00   | 0.35   | 1.72   |
| 4 | 28 | 18.96  | 0.00  | 0.00   | 0.51   | 0.03   |
| 4 | 29 | 0.00   | 0.08  | 0.72   | 0.47   | 0.07   |
| 4 | 30 | 1.86   | 0.00  | 0.00   | 0.19   | 0.00   |
| 5 | 5  | 0.00   | 0.00  | 0.00   | 0.00   | 0.00   |
| 5 | 6  | 0.55   | 32.52 | 7.48   | 65.19  | 0.14   |
| 5 | 7  | 0.50   | 1.70  | 0.15   | 38.40  | 0.00   |
| 5 | 8  | 0.22   | 1.58  | 119.04 | 3.39   | 0.00   |
| 5 | 9  | 73.98  | 10.70 | 0.47   | 67.68  | 0.00   |
| 5 | 10 | 0.79   | 1.01  | 0.24   | 5.03   | 10.59  |
| 5 | 11 | 0.10   | 0.45  | 32.03  | 70.08  | 0.24   |
| 5 | 12 | 0.11   | 0.15  | 163.41 | 64.09  | 0.31   |
| 5 | 13 | 112.01 | 1.77  | 0.38   | 1.45   | 1.21   |
| 5 | 14 | 0.00   | 0.81  | 0.03   | 1.80   | 0.02   |
| 5 | 15 | 0.00   | 1.29  | 0.02   | 2.71   | 0.05   |
| 5 | 16 | 0.07   | 0.20  | 0.50   | 41.19  | 0.04   |
| 5 | 17 | 1.86   | 1.75  | 0.10   | 37.17  | 0.00   |
| 5 | 18 | 0.00   | 0.16  | 0.17   | 24.23  | 1.51   |
| 5 | 19 | 0.79   | 0.25  | 0.28   | 100.60 | 0.06   |
| 5 | 20 | 0.41   | 0.07  | 0.16   | 34.99  | 0.02   |
| 5 | 21 | 0.40   | 0.06  | 0.06   | 33.60  | 0.25   |
| 5 | 22 | 0.73   | 0.21  | 0.91   | 0.64   | 0.04   |
| 5 | 23 | 0.05   | 0.06  | 2.90   | 1.36   | 0.03   |
| 5 | 24 | 0.00   | 0.04  | 0.28   | 0.00   | 0.07   |
| 5 | 25 | 29.49  | 0.21  | 0.00   | 47.04  | 0.05   |
| 5 | 26 | 0.54   | 2.65  | 0.12   | 0.00   | 0.05   |
| 5 | 27 | 0.55   | 0.75  | 0.32   | 0.72   | 2.51   |
| 5 | 28 | 33.80  | 0.00  | 0.89   | 0.32   | 0.00   |
| 5 | 29 | 0.00   | 0.04  | 0.23   | 0.00   | 0.03   |
| 5 | 30 | 1.24   | 0.02  | 0.45   | 0.46   | 0.03   |
| 6 | 6  | 0.00   | 0.00  | 0.00   | 0.00   | 0.00   |
| 6 | 7  | 0.06   | 1.88  | 0.74   | 175.65 | 263.84 |
| 6 | 8  | 0.61   | 2.01  | 66.16  | 38.16  | 168.27 |
| 6 | 9  | 0.34   | 0.34  | 104.80 | 16.46  | 55.03  |
| 6 | 10 | 75.04  | 1.48  | 3.49   | 38.57  | 0.66   |
| 6 | 11 | 49.76  | 10.49 | 140.15 | 19.37  | 0.08   |
| 6 | 12 | 21.98  | 0.16  | 4.62   | 1.98   | 28.99  |

|   |    |        |        |        |        |        |
|---|----|--------|--------|--------|--------|--------|
| 6 | 13 | 0.33   | 1.49   | 97.87  | 1.04   | 0.10   |
| 6 | 14 | 0.08   | 0.28   | 0.04   | 0.70   | 0.01   |
| 6 | 15 | 0.13   | 2.13   | 0.09   | 1.30   | 111.29 |
| 6 | 16 | 0.01   | 0.11   | 0.04   | 30.23  | 0.02   |
| 6 | 17 | 0.10   | 1.53   | 37.75  | 2.24   | 0.03   |
| 6 | 18 | 0.26   | 0.40   | 0.41   | 112.40 | 128.69 |
| 6 | 19 | 0.03   | 0.17   | 0.19   | 95.19  | 0.01   |
| 6 | 20 | 0.47   | 0.07   | 0.07   | 55.59  | 0.03   |
| 6 | 21 | 0.63   | 0.21   | 0.08   | 3.35   | 63.96  |
| 6 | 22 | 1.34   | 0.09   | 0.38   | 1.50   | 0.02   |
| 6 | 23 | 0.01   | 0.08   | 0.92   | 44.89  | 0.01   |
| 6 | 24 | 0.17   | 0.22   | 0.14   | 0.00   | 3.19   |
| 6 | 25 | 0.37   | 0.28   | 0.00   | 6.60   | 0.01   |
| 6 | 26 | 0.15   | 1.79   | 0.55   | 0.00   | 86.11  |
| 6 | 27 | 0.03   | 0.43   | 0.03   | 1.11   | 1.02   |
| 6 | 28 | 0.05   | 0.00   | 2.32   | 0.11   | 0.46   |
| 6 | 29 | 0.11   | 0.08   | 0.22   | 0.00   | 1.34   |
| 6 | 30 | 0.11   | 0.01   | 1.01   | 0.49   | 0.04   |
| 7 | 7  | 0.00   | 0.00   | 0.00   | 0.00   | 0.00   |
| 7 | 8  | 4.75   | 0.50   | 1.86   | 186.46 | 63.17  |
| 7 | 9  | 5.21   | 120.49 | 125.96 | 48.49  | 67.24  |
| 7 | 10 | 87.29  | 195.85 | 106.08 | 1.12   | 4.16   |
| 7 | 11 | 0.88   | 202.31 | 0.34   | 124.02 | 2.00   |
| 7 | 12 | 0.12   | 0.28   | 80.98  | 167.83 | 0.05   |
| 7 | 13 | 0.00   | 81.57  | 0.07   | 58.40  | 0.12   |
| 7 | 14 | 0.06   | 173.33 | 0.15   | 124.79 | 0.05   |
| 7 | 15 | 0.02   | 173.00 | 0.14   | 37.92  | 0.49   |
| 7 | 16 | 0.17   | 0.45   | 0.08   | 9.08   | 0.09   |
| 7 | 17 | 0.37   | 0.54   | 0.56   | 14.80  | 0.11   |
| 7 | 18 | 0.02   | 65.98  | 0.12   | 14.05  | 0.04   |
| 7 | 19 | 2.57   | 0.32   | 0.04   | 26.39  | 0.01   |
| 7 | 20 | 0.12   | 0.13   | 0.14   | 10.00  | 0.03   |
| 7 | 21 | 0.07   | 0.30   | 0.63   | 47.99  | 0.49   |
| 7 | 22 | 0.06   | 0.07   | 0.12   | 1.04   | 0.20   |
| 7 | 23 | 0.21   | 0.11   | 0.12   | 100.90 | 0.06   |
| 7 | 24 | 0.01   | 0.15   | 0.09   | 0.01   | 0.08   |
| 7 | 25 | 1.77   | 0.14   | 0.35   | 87.63  | 0.06   |
| 7 | 26 | 1.37   | 0.04   | 0.40   | 0.08   | 1.59   |
| 7 | 27 | 0.07   | 0.12   | 0.34   | 1.76   | 0.00   |
| 7 | 28 | 0.21   | 0.00   | 0.02   | 0.07   | 0.26   |
| 7 | 29 | 0.03   | 0.07   | 0.06   | 0.05   | 1.15   |
| 7 | 30 | 0.62   | 0.00   | 0.11   | 0.24   | 0.06   |
| 8 | 8  | 0.00   | 0.00   | 0.00   | 0.00   | 0.00   |
| 8 | 9  | 102.13 | 54.91  | 76.71  | 83.17  | 61.90  |



|    |    |        |        |        |        |        |
|----|----|--------|--------|--------|--------|--------|
| 8  | 10 | 61.21  | 58.62  | 82.91  | 8.27   | 3.03   |
| 8  | 11 | 72.85  | 143.03 | 52.50  | 43.63  | 163.54 |
| 8  | 12 | 77.68  | 0.00   | 178.38 | 123.64 | 0.05   |
| 8  | 13 | 0.11   | 0.11   | 0.27   | 162.61 | 48.68  |
| 8  | 14 | 0.38   | 0.28   | 0.04   | 246.17 | 0.01   |
| 8  | 15 | 0.13   | 2.17   | 0.02   | 196.79 | 0.47   |
| 8  | 16 | 0.04   | 7.97   | 0.59   | 38.57  | 0.03   |
| 8  | 17 | 0.08   | 37.27  | 0.63   | 21.04  | 0.30   |
| 8  | 18 | 0.13   | 0.09   | 0.13   | 107.69 | 0.04   |
| 8  | 19 | 0.51   | 0.61   | 0.01   | 91.99  | 0.08   |
| 8  | 20 | 0.07   | 0.01   | 0.14   | 1.04   | 0.10   |
| 8  | 21 | 0.07   | 0.02   | 0.09   | 32.13  | 0.77   |
| 8  | 22 | 0.12   | 2.44   | 0.11   | 70.64  | 0.39   |
| 8  | 23 | 0.10   | 0.01   | 0.20   | 155.16 | 0.14   |
| 8  | 24 | 0.05   | 0.04   | 0.16   | 0.07   | 0.06   |
| 8  | 25 | 0.91   | 0.02   | 0.35   | 89.39  | 0.10   |
| 8  | 26 | 0.55   | 3.53   | 0.10   | 1.15   | 2.19   |
| 8  | 27 | 0.16   | 0.76   | 0.19   | 1.68   | 0.00   |
| 8  | 28 | 0.05   | 0.00   | 0.22   | 0.47   | 0.42   |
| 8  | 29 | 0.48   | 0.00   | 0.08   | 0.36   | 0.83   |
| 8  | 30 | 0.16   | 0.34   | 0.51   | 1.50   | 0.29   |
| 9  | 9  | 0.00   | 0.00   | 0.00   | 0.00   | 0.00   |
| 9  | 10 | 25.84  | 53.78  | 35.46  | 29.53  | 0.47   |
| 9  | 11 | 56.74  | 26.05  | 13.69  | 61.99  | 50.96  |
| 9  | 12 | 62.61  | 48.82  | 82.44  | 81.90  | 0.01   |
| 9  | 13 | 166.30 | 22.56  | 0.49   | 33.08  | 172.96 |
| 9  | 14 | 0.13   | 37.73  | 0.40   | 0.25   | 0.50   |
| 9  | 15 | 0.09   | 26.44  | 0.28   | 151.55 | 0.25   |
| 9  | 16 | 0.43   | 2.27   | 0.17   | 21.31  | 0.21   |
| 9  | 17 | 1.39   | 150.91 | 0.08   | 28.45  | 1.24   |
| 9  | 18 | 0.04   | 68.26  | 0.07   | 90.37  | 0.01   |
| 9  | 19 | 0.44   | 0.46   | 0.04   | 88.00  | 0.05   |
| 9  | 20 | 0.25   | 0.14   | 0.16   | 161.17 | 0.13   |
| 9  | 21 | 0.18   | 0.12   | 0.67   | 83.75  | 0.19   |
| 9  | 22 | 0.79   | 0.60   | 0.25   | 0.30   | 0.34   |
| 9  | 23 | 0.48   | 0.29   | 0.43   | 15.08  | 0.55   |
| 9  | 24 | 0.04   | 0.12   | 0.33   | 0.02   | 0.01   |
| 9  | 25 | 0.63   | 0.13   | 0.23   | 87.24  | 0.44   |
| 9  | 26 | 0.06   | 0.62   | 0.13   | 0.68   | 0.94   |
| 9  | 27 | 0.35   | 0.13   | 0.58   | 26.74  | 0.00   |
| 9  | 28 | 0.44   | 0.00   | 0.35   | 0.23   | 0.25   |
| 9  | 29 | 0.33   | 0.08   | 0.24   | 0.22   | 2.13   |
| 9  | 30 | 1.96   | 0.05   | 0.43   | 0.65   | 0.90   |
| 10 | 10 | 0.00   | 0.00   | 0.00   | 0.00   | 0.00   |

|    |    |        |        |        |        |        |
|----|----|--------|--------|--------|--------|--------|
| 10 | 11 | 113.25 | 73.57  | 164.75 | 45.91  | 0.63   |
| 10 | 12 | 38.25  | 29.43  | 94.13  | 120.24 | 0.06   |
| 10 | 13 | 0.32   | 110.16 | 0.11   | 60.38  | 3.14   |
| 10 | 14 | 0.37   | 166.30 | 0.14   | 64.08  | 0.02   |
| 10 | 15 | 0.21   | 78.21  | 0.18   | 12.48  | 0.25   |
| 10 | 16 | 0.14   | 64.16  | 0.12   | 72.17  | 0.07   |
| 10 | 17 | 0.01   | 23.26  | 1.10   | 133.34 | 0.00   |
| 10 | 18 | 0.06   | 3.39   | 0.21   | 37.41  | 0.05   |
| 10 | 19 | 0.40   | 0.12   | 0.04   | 2.48   | 0.06   |
| 10 | 20 | 0.22   | 63.52  | 0.08   | 70.21  | 0.03   |
| 10 | 21 | 0.18   | 173.84 | 0.26   | 11.00  | 0.36   |
| 10 | 22 | 0.34   | 0.08   | 0.14   | 58.42  | 0.05   |
| 10 | 23 | 0.11   | 56.02  | 0.20   | 71.61  | 0.06   |
| 10 | 24 | 0.20   | 141.81 | 0.11   | 0.20   | 0.12   |
| 10 | 25 | 0.26   | 91.81  | 0.41   | 75.79  | 0.07   |
| 10 | 26 | 0.34   | 0.27   | 0.65   | 121.26 | 1.22   |
| 10 | 27 | 0.15   | 28.55  | 0.25   | 1.00   | 0.00   |
| 10 | 28 | 0.21   | 0.01   | 0.05   | 1.66   | 0.27   |
| 10 | 29 | 1.04   | 0.39   | 0.10   | 1.48   | 0.75   |
| 10 | 30 | 1.27   | 28.76  | 0.12   | 0.56   | 0.05   |
| 11 | 11 | 0.00   | 0.00   | 0.00   | 0.00   | 0.00   |
| 11 | 12 | 29.85  | 90.82  | 57.01  | 42.72  | 0.00   |
| 11 | 13 | 0.01   | 89.69  | 0.40   | 42.26  | 124.34 |
| 11 | 14 | 0.10   | 92.39  | 0.01   | 50.36  | 0.71   |
| 11 | 15 | 0.13   | 82.66  | 0.09   | 180.17 | 0.03   |
| 11 | 16 | 0.04   | 1.55   | 0.84   | 107.13 | 0.20   |
| 11 | 17 | 0.09   | 141.56 | 0.24   | 163.46 | 0.06   |
| 11 | 18 | 0.37   | 109.62 | 0.11   | 21.79  | 0.00   |
| 11 | 19 | 0.65   | 0.23   | 0.08   | 93.37  | 0.11   |
| 11 | 20 | 0.13   | 0.33   | 0.19   | 42.20  | 0.07   |
| 11 | 21 | 0.08   | 72.32  | 0.13   | 143.03 | 0.00   |
| 11 | 22 | 0.03   | 0.09   | 0.37   | 70.72  | 1.34   |
| 11 | 23 | 0.04   | 0.23   | 0.33   | 37.80  | 0.18   |
| 11 | 24 | 0.13   | 0.91   | 0.42   | 0.11   | 0.00   |
| 11 | 25 | 1.30   | 70.38  | 0.17   | 72.40  | 0.28   |
| 11 | 26 | 1.07   | 0.10   | 0.12   | 3.26   | 0.82   |
| 11 | 27 | 0.16   | 0.41   | 0.26   | 0.68   | 0.00   |
| 11 | 28 | 0.02   | 0.02   | 0.43   | 0.58   | 0.16   |
| 11 | 29 | 0.11   | 0.27   | 0.26   | 0.95   | 1.07   |
| 11 | 30 | 0.28   | 0.11   | 0.70   | 1.32   | 0.32   |
| 12 | 12 | 0.00   | 0.00   | 0.00   | 0.00   | 0.00   |
| 12 | 13 | 0.24   | 55.05  | 0.65   | 133.87 | 0.00   |
| 12 | 14 | 0.05   | 12.88  | 0.10   | 94.86  | 0.00   |
| 12 | 15 | 0.28   | 117.60 | 0.35   | 132.74 | 26.26  |

|    |    |        |        |        |        |        |
|----|----|--------|--------|--------|--------|--------|
| 12 | 16 | 0.04   | 0.24   | 0.10   | 33.18  | 0.00   |
| 12 | 17 | 0.01   | 50.60  | 0.38   | 105.10 | 0.00   |
| 12 | 18 | 0.49   | 80.87  | 0.79   | 22.70  | 37.92  |
| 12 | 19 | 0.30   | 0.00   | 0.04   | 158.65 | 0.00   |
| 12 | 20 | 0.14   | 90.63  | 0.17   | 1.59   | 0.00   |
| 12 | 21 | 0.18   | 17.94  | 0.14   | 62.22  | 6.71   |
| 12 | 22 | 0.05   | 0.00   | 0.16   | 0.51   | 0.00   |
| 12 | 23 | 0.04   | 44.64  | 0.28   | 49.59  | 0.00   |
| 12 | 24 | 0.34   | 3.51   | 0.21   | 0.05   | 0.68   |
| 12 | 25 | 0.20   | 158.33 | 0.09   | 98.98  | 0.00   |
| 12 | 26 | 0.13   | 0.27   | 1.05   | 2.57   | 26.28  |
| 12 | 27 | 0.08   | 0.94   | 0.11   | 0.45   | 0.80   |
| 12 | 28 | 0.22   | 0.01   | 0.35   | 0.36   | 0.10   |
| 12 | 29 | 0.17   | 1.87   | 0.39   | 0.49   | 0.30   |
| 12 | 30 | 1.54   | 0.11   | 0.28   | 1.52   | 0.00   |
| 13 | 13 | 0.00   | 0.00   | 0.00   | 0.00   | 0.00   |
| 13 | 14 | 0.00   | 35.39  | 0.00   | 118.00 | 0.24   |
| 13 | 15 | 0.00   | 37.29  | 0.00   | 97.67  | 0.05   |
| 13 | 16 | 0.00   | 75.37  | 0.00   | 74.74  | 0.37   |
| 13 | 17 | 6.64   | 184.76 | 133.91 | 95.54  | 0.18   |
| 13 | 18 | 0.00   | 13.97  | 0.00   | 0.44   | 0.00   |
| 13 | 19 | 121.67 | 0.08   | 6.29   | 0.06   | 0.73   |
| 13 | 20 | 1.27   | 168.74 | 0.00   | 77.87  | 0.43   |
| 13 | 21 | 1.32   | 12.01  | 0.00   | 99.61  | 0.00   |
| 13 | 22 | 2.62   | 0.02   | 0.51   | 52.09  | 0.05   |
| 13 | 23 | 0.00   | 116.26 | 2.17   | 0.17   | 0.20   |
| 13 | 24 | 0.00   | 43.00  | 0.00   | 0.50   | 0.00   |
| 13 | 25 | 1.72   | 13.46  | 0.00   | 0.35   | 0.31   |
| 13 | 26 | 0.00   | 0.19   | 0.00   | 40.22  | 0.81   |
| 13 | 27 | 0.93   | 1.03   | 0.00   | 0.15   | 0.00   |
| 13 | 28 | 121.11 | 0.03   | 0.07   | 50.79  | 0.02   |
| 13 | 29 | 0.00   | 0.50   | 0.56   | 44.56  | 1.22   |
| 13 | 30 | 2.57   | 0.34   | 0.21   | 0.15   | 0.43   |
| 14 | 14 | 0.00   | 0.00   | 0.00   | 0.00   | 0.00   |
| 14 | 15 | 15.95  | 94.68  | 26.04  | 55.27  | 0.00   |
| 14 | 16 | 0.58   | 85.82  | 16.21  | 28.56  | 0.92   |
| 14 | 17 | 0.00   | 107.52 | 0.00   | 71.01  | 0.89   |
| 14 | 18 | 51.27  | 46.46  | 124.68 | 36.47  | 0.00   |
| 14 | 19 | 0.00   | 0.00   | 0.00   | 0.12   | 155.47 |
| 14 | 20 | 94.43  | 61.22  | 85.21  | 164.16 | 109.35 |
| 14 | 21 | 45.30  | 169.07 | 67.56  | 62.28  | 0.00   |
| 14 | 22 | 38.18  | 0.00   | 79.14  | 19.38  | 1.90   |
| 14 | 23 | 158.64 | 106.57 | 0.08   | 0.47   | 267.14 |
| 14 | 24 | 28.45  | 107.45 | 88.50  | 1.14   | 0.00   |

|    |    |        |        |        |        |        |
|----|----|--------|--------|--------|--------|--------|
| 14 | 25 | 38.33  | 95.22  | 0.00   | 1.04   | 162.96 |
| 14 | 26 | 39.47  | 0.14   | 109.00 | 0.85   | 0.00   |
| 14 | 27 | 0.00   | 0.76   | 66.69  | 0.46   | 0.00   |
| 14 | 28 | 0.00   | 0.04   | 0.46   | 0.22   | 1.09   |
| 14 | 29 | 2.11   | 0.35   | 0.00   | 0.15   | 0.76   |
| 14 | 30 | 0.19   | 0.31   | 30.58  | 0.08   | 0.83   |
| 15 | 15 | 0.00   | 0.00   | 0.00   | 0.00   | 0.00   |
| 15 | 16 | 100.31 | 137.27 | 0.81   | 125.84 | 0.00   |
| 15 | 17 | 0.00   | 17.75  | 0.00   | 52.06  | 0.00   |
| 15 | 18 | 43.12  | 126.82 | 69.10  | 52.06  | 0.99   |
| 15 | 19 | 0.00   | 0.24   | 0.00   | 9.88   | 0.00   |
| 15 | 20 | 186.46 | 20.53  | 56.81  | 196.71 | 0.00   |
| 15 | 21 | 108.50 | 24.75  | 72.28  | 79.37  | 148.69 |
| 15 | 22 | 18.66  | 0.51   | 26.78  | 24.84  | 0.00   |
| 15 | 23 | 18.27  | 64.47  | 0.34   | 43.72  | 0.00   |
| 15 | 24 | 71.01  | 167.10 | 90.54  | 1.54   | 0.10   |
| 15 | 25 | 31.24  | 53.69  | 0.00   | 60.65  | 0.00   |
| 15 | 26 | 80.58  | 0.10   | 35.64  | 52.17  | 27.62  |
| 15 | 27 | 0.00   | 0.30   | 1.54   | 26.84  | 0.30   |
| 15 | 28 | 0.00   | 0.01   | 0.14   | 65.87  | 0.44   |
| 15 | 29 | 0.92   | 0.54   | 0.00   | 58.46  | 1.53   |
| 15 | 30 | 56.41  | 0.30   | 0.34   | 0.35   | 0.09   |
| 16 | 16 | 0.00   | 0.00   | 0.00   | 0.00   | 0.00   |
| 16 | 17 | 0.01   | 156.26 | 0.00   | 170.82 | 1.53   |
| 16 | 18 | 0.37   | 89.20  | 138.81 | 181.17 | 0.00   |
| 16 | 19 | 0.00   | 0.70   | 0.00   | 44.24  | 69.09  |
| 16 | 20 | 134.26 | 25.25  | 93.25  | 66.56  | 207.52 |
| 16 | 21 | 151.50 | 48.51  | 81.68  | 153.28 | 0.00   |
| 16 | 22 | 34.51  | 2.02   | 107.78 | 125.28 | 2.06   |
| 16 | 23 | 11.12  | 75.23  | 0.32   | 61.00  | 41.41  |
| 16 | 24 | 120.29 | 95.81  | 35.00  | 1.36   | 0.00   |
| 16 | 25 | 87.83  | 13.98  | 0.00   | 138.65 | 35.39  |
| 16 | 26 | 103.00 | 0.04   | 8.76   | 1.15   | 0.00   |
| 16 | 27 | 0.00   | 40.73  | 20.79  | 41.77  | 0.02   |
| 16 | 28 | 0.03   | 0.03   | 80.80  | 0.42   | 0.22   |
| 16 | 29 | 35.46  | 0.29   | 0.00   | 0.20   | 1.25   |
| 16 | 30 | 0.26   | 0.85   | 22.83  | 0.60   | 1.12   |
| 17 | 17 | 0.00   | 0.00   | 0.00   | 0.00   | 0.00   |
| 17 | 18 | 0.00   | 17.05  | 0.00   | 30.40  | 0.03   |
| 17 | 19 | 154.72 | 0.55   | 201.49 | 34.62  | 83.81  |
| 17 | 20 | 65.12  | 22.84  | 0.00   | 179.26 | 92.62  |
| 17 | 21 | 88.21  | 116.83 | 0.00   | 102.19 | 0.02   |
| 17 | 22 | 14.04  | 1.52   | 0.15   | 87.81  | 110.05 |
| 17 | 23 | 0.00   | 110.76 | 0.91   | 86.99  | 165.23 |

|    |    |        |       |        |        |        |
|----|----|--------|-------|--------|--------|--------|
| 17 | 24 | 0.00   | 56.77 | 0.00   | 0.70   | 0.00   |
| 17 | 25 | 55.74  | 43.87 | 1.14   | 86.32  | 9.89   |
| 17 | 26 | 0.57   | 0.05  | 0.00   | 1.70   | 0.23   |
| 17 | 27 | 1.84   | 42.72 | 0.00   | 27.28  | 0.00   |
| 17 | 28 | 6.53   | 0.01  | 0.29   | 0.30   | 0.99   |
| 17 | 29 | 0.00   | 0.24  | 0.49   | 0.50   | 172.29 |
| 17 | 30 | 64.91  | 0.61  | 0.25   | 0.38   | 90.50  |
| 18 | 18 | 0.00   | 0.00  | 0.00   | 0.00   | 0.00   |
| 18 | 19 | 0.00   | 0.00  | 0.00   | 69.25  | 0.00   |
| 18 | 20 | 220.29 | 39.35 | 6.40   | 80.40  | 0.00   |
| 18 | 21 | 29.95  | 4.46  | 139.00 | 43.56  | 114.33 |
| 18 | 22 | 25.84  | 0.00  | 26.99  | 79.83  | 0.00   |
| 18 | 23 | 52.16  | 75.03 | 80.06  | 28.75  | 0.00   |
| 18 | 24 | 11.66  | 42.68 | 49.64  | 0.05   | 0.49   |
| 18 | 25 | 71.83  | 13.36 | 0.00   | 115.31 | 0.00   |
| 18 | 26 | 128.92 | 0.19  | 122.07 | 0.55   | 40.86  |
| 18 | 27 | 0.00   | 39.53 | 61.80  | 71.22  | 3.10   |
| 18 | 28 | 0.00   | 0.03  | 41.44  | 0.13   | 1.83   |
| 18 | 29 | 0.44   | 1.51  | 0.00   | 0.24   | 6.06   |
| 18 | 30 | 35.19  | 0.46  | 92.89  | 0.38   | 0.26   |
| 19 | 19 | 0.00   | 0.00  | 0.00   | 0.00   | 0.00   |
| 19 | 20 | 0.00   | 0.00  | 0.00   | 146.25 | 11.76  |
| 19 | 21 | 0.23   | 0.00  | 0.00   | 66.38  | 0.00   |
| 19 | 22 | 0.29   | 0.37  | 0.71   | 0.20   | 79.74  |
| 19 | 23 | 0.00   | 0.00  | 3.24   | 40.18  | 184.89 |
| 19 | 24 | 0.00   | 0.00  | 0.00   | 0.00   | 0.00   |
| 19 | 25 | 62.89  | 0.00  | 0.48   | 36.17  | 16.77  |
| 19 | 26 | 3.35   | 0.07  | 0.00   | 0.00   | 0.00   |
| 19 | 27 | 1.63   | 0.02  | 0.00   | 103.26 | 0.00   |
| 19 | 28 | 128.23 | 1.19  | 1.56   | 0.00   | 0.21   |
| 19 | 29 | 0.00   | 0.00  | 1.79   | 0.00   | 0.24   |
| 19 | 30 | 2.24   | 0.00  | 1.01   | 0.57   | 0.55   |
| 20 | 20 | 0.00   | 0.00  | 0.00   | 0.00   | 0.00   |
| 20 | 21 | 95.86  | 24.52 | 44.15  | 183.82 | 0.00   |
| 20 | 22 | 47.61  | 0.00  | 94.77  | 93.81  | 58.38  |
| 20 | 23 | 114.01 | 71.69 | 101.48 | 39.85  | 15.88  |
| 20 | 24 | 46.65  | 35.00 | 33.35  | 0.09   | 0.00   |
| 20 | 25 | 168.98 | 7.96  | 0.00   | 40.25  | 8.17   |
| 20 | 26 | 113.39 | 0.05  | 139.98 | 0.85   | 0.00   |
| 20 | 27 | 0.00   | 60.10 | 135.13 | 0.08   | 0.00   |
| 20 | 28 | 0.60   | 0.08  | 4.22   | 0.23   | 0.04   |
| 20 | 29 | 41.72  | 0.68  | 0.00   | 0.34   | 0.16   |
| 20 | 30 | 85.76  | 0.15  | 164.21 | 0.14   | 0.55   |
| 21 | 21 | 0.00   | 0.00  | 0.00   | 0.00   | 0.00   |

|    |    |        |        |        |        |        |
|----|----|--------|--------|--------|--------|--------|
| 21 | 22 | 49.95  | 0.00   | 53.14  | 67.35  | 0.00   |
| 21 | 23 | 59.59  | 9.14   | 51.42  | 141.40 | 0.00   |
| 21 | 24 | 31.40  | 20.66  | 43.29  | 39.20  | 0.51   |
| 21 | 25 | 85.05  | 21.07  | 0.00   | 1.64   | 0.00   |
| 21 | 26 | 20.18  | 41.35  | 126.00 | 0.53   | 6.02   |
| 21 | 27 | 0.27   | 116.82 | 28.18  | 0.63   | 1.44   |
| 21 | 28 | 57.67  | 0.02   | 0.46   | 0.27   | 72.26  |
| 21 | 29 | 31.61  | 41.84  | 0.03   | 0.14   | 208.43 |
| 21 | 30 | 22.64  | 0.48   | 70.91  | 0.58   | 0.21   |
| 22 | 22 | 0.00   | 0.00   | 0.00   | 0.00   | 0.00   |
| 22 | 23 | 122.38 | 0.00   | 65.61  | 0.17   | 119.91 |
| 22 | 24 | 45.73  | 0.00   | 65.68  | 129.23 | 0.00   |
| 22 | 25 | 17.15  | 0.00   | 0.00   | 0.32   | 95.91  |
| 22 | 26 | 139.50 | 1.71   | 8.19   | 105.69 | 0.00   |
| 22 | 27 | 0.19   | 0.40   | 43.37  | 0.17   | 0.00   |
| 22 | 28 | 72.46  | 0.00   | 0.82   | 94.90  | 70.72  |
| 22 | 29 | 40.50  | 0.00   | 0.18   | 40.02  | 161.06 |
| 22 | 30 | 72.11  | 0.00   | 134.00 | 0.02   | 24.38  |
| 23 | 23 | 0.00   | 0.00   | 0.00   | 0.00   | 0.00   |
| 23 | 24 | 48.13  | 77.12  | 1.20   | 0.00   | 0.00   |
| 23 | 25 | 37.08  | 57.88  | 0.00   | 52.29  | 16.54  |
| 23 | 26 | 44.41  | 0.11   | 0.10   | 0.00   | 0.00   |
| 23 | 27 | 0.00   | 57.71  | 0.10   | 70.69  | 0.00   |
| 23 | 28 | 0.00   | 0.01   | 58.00  | 0.00   | 0.16   |
| 23 | 29 | 0.39   | 0.28   | 89.46  | 0.00   | 45.96  |
| 23 | 30 | 0.26   | 0.49   | 56.82  | 0.55   | 1.18   |
| 24 | 24 | 0.00   | 0.00   | 0.00   | 0.00   | 0.00   |
| 24 | 25 | 78.00  | 109.00 | 0.00   | 0.00   | 0.00   |
| 24 | 26 | 100.20 | 0.09   | 93.00  | 142.13 | 0.49   |
| 24 | 27 | 0.00   | 0.83   | 70.84  | 0.01   | 0.99   |
| 24 | 28 | 0.00   | 0.03   | 41.98  | 25.74  | 0.05   |
| 24 | 29 | 1.20   | 1.28   | 0.00   | 0.14   | 0.14   |
| 24 | 30 | 48.80  | 0.46   | 41.61  | 0.00   | 0.00   |
| 25 | 25 | 0.00   | 0.00   | 0.00   | 0.00   | 0.00   |
| 25 | 26 | 94.11  | 47.78  | 0.00   | 0.00   | 0.00   |
| 25 | 27 | 1.72   | 3.80   | 0.00   | 65.94  | 0.00   |
| 25 | 28 | 63.70  | 0.07   | 1.57   | 0.00   | 0.35   |
| 25 | 29 | 26.65  | 98.78  | 3.89   | 0.00   | 0.29   |
| 25 | 30 | 55.76  | 0.43   | 0.64   | 1.71   | 0.63   |
| 26 | 26 | 0.00   | 0.00   | 0.00   | 0.00   | 0.00   |
| 26 | 27 | 1.34   | 66.34  | 50.62  | 0.00   | 0.28   |
| 26 | 28 | 1.34   | 0.00   | 42.07  | 8.18   | 176.94 |
| 26 | 29 | 30.30  | 121.42 | 0.07   | 26.70  | 75.80  |
| 26 | 30 | 4.74   | 0.08   | 108.20 | 0.00   | 135.91 |

|    |    |        |       |        |        |        |
|----|----|--------|-------|--------|--------|--------|
| 27 | 27 | 0.00   | 0.00  | 0.00   | 0.00   | 0.00   |
| 27 | 28 | 52.78  | 0.04  | 99.51  | 0.02   | 0.00   |
| 27 | 29 | 0.00   | 49.25 | 0.03   | 0.05   | 0.00   |
| 27 | 30 | 109.78 | 20.70 | 30.39  | 145.84 | 0.00   |
| 28 | 28 | 0.00   | 0.00  | 0.00   | 0.00   | 0.00   |
| 28 | 29 | 0.00   | 0.00  | 81.58  | 68.36  | 134.58 |
| 28 | 30 | 73.25  | 0.28  | 275.61 | 0.00   | 121.11 |
| 29 | 29 | 0.00   | 0.00  | 0.00   | 0.00   | 0.00   |
| 29 | 30 | 0.23   | 83.91 | 219.66 | 0.00   | 95.76  |
| 30 | 30 | 0.00   | 0.00  | 0.00   | 0.00   | 0.00   |

## References:

- Jang, H.; Do, L. M.; Kim, Y.; Zyung, T.; Do, Y., Synthesis and characterization of new luminescent materials containing various substituted 8-quinolinolate. *Synth. Met.* **2001**, *121* (1-3), 1667-1668, doi:10.1016/s0379-6779(00)00941-3.
- Becke, A. D., Density-functional exchange-energy approximation with correct asymptotic behavior. *Phys Rev A Gen Phys* **1988**, *38* (6), 3098-3100, doi:10.1103/physreva.38.3098.
- Lee, C.; Yang, W.; Parr, R. G., Development of the Colle-Salvetti correlation-energy formula into a functional of the electron density. *Phys. Rev. B Condens. Matter.* **1988**, *37* (2), 785-789, doi:10.1103/physrevb.37.785.
- Woon, D. E.; Dunning, T. H., Gaussian basis sets for use in correlated molecular calculations. III. The atoms aluminum through argon. *J. Chem. Phys.* **1993**, *98* (2), 1358-1371, doi:10.1063/1.464303.
- Grimme, S.; Antony, J.; Ehrlich, S.; Krieg, H., A consistent and accurate ab initio parametrization of density functional dispersion correction (DFT-D) for the 94 elements H-Pu. *J. Chem. Phys.* **2010**, *132* (15), 19, doi:10.1063/1.3382344.
- Weigend, F.; Ahlrichs, R., Balanced basis sets of split valence, triple zeta valence and quadruple zeta valence quality for H to Rn: Design and assessment of accuracy. *Phys. Chem. Chem. Phys.* **2005**, *7* (18), 3297-305, doi:10.1039/b508541a.
- Weigend, F., Accurate Coulomb-fitting basis sets for H to Rn. *Phys. Chem. Chem. Phys.* **2006**, *8* (9), 1057-65, doi:10.1039/b515623h.
- Rolfes, J. D.; Neese, F.; Pantazis, D. A., All-electron scalar relativistic basis sets for the elements Rb-Xe. *J. Comput. Chem.* **2020**, *41* (20), 1842-1849, doi:10.1002/jcc.26355.
- Pantazis, D. A.; Chen, X. Y.; Landis, C. R.; Neese, F., All-electron scalar relativistic basis sets for third-row transition metal atoms. *J. Chem. Theory Comput.* **2008**, *4* (6), 908-919, doi:10.1021/ct800047t.
- Daniel Aravena, M. A., Alexander A. Auer, Ute Becker, Giovanni Bistoni, Dmytro Bykov, Vijay G. Chilkuri, Dipayan Datta, Achintya Kumar Dutta, Sebastian Ehlert, Dmitry Ganyushin, Miquel Garcia, Yang Guo, Andreas Hansen, Benjamin Helmich-Paris, Lee Huntington, R'obert Izs'ak, Marcus Kettner, Christian Kollmar, Simone Kossmann, Martin Krupiřka, Lucas Lang, Marvin Lechner, Dagmar Lenk, Dimitrios G. Liakos, Dimitrios Manganas, Dimitrios A. Pantazis, Anastasios Papadopoulos, Taras Petrenko, Peter Pinski, Philipp Pracht, Christoph Reimann, Marius Retegan,; Christoph Riplinger, T. R., Michael Roemelt, Masaaki Saitow, Barbara Sandh'ofer, Igor Schapiro, Avijith Sen, Kantharuban Sivalingam, Bernardo de Souza, Georgi Stoychev, Willem Van den Heuvel, Boris Wezislá, Mih'aly K'allay, Stefan Grimme, Edward Valeev, Garnet Chan, Jiri Pittner, Martin Brehm, Lars Goerigk,

Vilhj'almur Asgeirsson, Liviu Ungur., ORCA 5.0.1.

11. Neese, F., Software update: the ORCA program system, version 4.0. *Wiley Interdiscip. Rev.-Comput. Mol. Sci.* **2018**, *8* (1), 6, doi:10.1002/wcms.1327.
12. Wheeler, S. E.; Houk, K. N., Integration Grid Errors for Meta-GGA-Predicted Reaction Energies: Origin of Grid Errors for the M06 Suite of Functionals. *J. Chem. Theory Comput.* **2010**, *6* (2), 395-404, doi:10.1021/ct900639j.
13. Lu, T.; Chen, F., Multiwfn: A multifunctional wavefunction analyzer. *J. Comput. Chem.* **2012**, *33* (5), 580-592, doi:10.1002/jcc.22885.
14. Lu, T.; Chen, F., Quantitative analysis of molecular surface based on improved Marching Tetrahedra algorithm. *J. Mol. Graph. Model.* **2012**, *38*, 314-323, doi:10.1016/j.jmngm.2012.07.004.
15. Xiao, M.; Lu, T., Generalized Charge Decomposition Analysis (GCDA) Method. *J. Adv. Phys. Chem.* **2015**, *04* (04), 111-124, doi:10.12677/japc.2015.44013.
16. Lu, T.; Chen, F.-W., Comparison of Computational Methods for Atomic Charges. *Acta Physico-Chimica Sinica* **2012**, *28* (1), 1-18, doi:10.3866/pku.Whxb2012281.
17. Lu, T.; Chen, F., ATOMIC DIPOLE MOMENT CORRECTED HIRSHFELD POPULATION METHOD. *J. Theor. Comput. Chem.* **2012**, *11* (1), 163-183, doi:10.1142/s0219633612500113.
18. Bannwarth, C.; Caldeweyher, E.; Ehlert, S.; Hansen, A.; Pracht, P.; Seibert, J.; Spicher, S.; Grimme, S., Extendedtight-bindingquantum chemistry methods. *Wiley Interdiscip. Rev.-Comput. Mol. Sci.* **2021**, *11* (2), 49, doi:10.1002/wcms.1493.
19. Grimme, S.; Bannwarth, C.; Shushkov, P., A Robust and Accurate Tight-Binding Quantum Chemical Method for Structures, Vibrational Frequencies, and Noncovalent Interactions of Large Molecular Systems Parametrized for All spd-Block Elements (Z=1-86). *J. Chem. Theory Comput.* **2017**, *13* (5), 1989-2009, doi:10.1021/acs.jctc.7b00118.
20. Bannwarth, C.; Ehlert, S.; Grimme, S., GFN2-xTB-An Accurate and Broadly Parametrized Self-Consistent Tight-Binding Quantum Chemical Method with Multipole Electrostatics and Density-Dependent Dispersion Contributions. *J. Chem. Theory Comput.* **2019**, *15* (3), 1652-1671, doi:10.1021/acs.jctc.8b01176.
21. Spicher, S.; Grimme, S., Robust Atomistic Modeling of Materials, Organometallic, and Biochemical Systems. *Angew. Chem.-Int. Edit.* **2020**, *59* (36), 15665-15673, doi:10.1002/anie.202004239.
22. Pracht, P.; Bohle, F.; Grimme, S., Automated exploration of the low-energy chemical space with fast quantum chemical methods. *Phys. Chem. Chem. Phys.* **2020**, *22* (14), 7169-7192, doi:10.1039/c9cp06869d.
23. Bi, H.; Chen, D.; Li, D.; Yuan, Y.; Xia, D.; Zhang, Z.; Zhang, H.; Wang, Y., A green emissive amorphous fac-Alq<sub>3</sub> solid generated by grinding crystalline blue fac-Alq<sub>3</sub> powder. *Chem. Commun.* **2011**, *47* (14), 4135-7, doi:10.1039/c1cc00060h.
24. Baldo, M. A.; Lamansky, S.; Burrows, P. E.; Thompson, M. E.; Forrest, S. R., Very high-efficiency green organic light-emitting devices based on electrophosphorescence. *Appl. Phys. Lett.* **1999**, *75* (1), 4-6, doi:10.1063/1.124258.
25. Peng, Q.; Niu, Y.; Shi, Q.; Gao, X.; Shuai, Z., Correlation Function Formalism for Triplet Excited State Decay: Combined Spin-Orbit and Nonadiabatic Couplings. *J. Chem. Theory Comput.* **2013**, *9* (2), 1132-1143, doi:10.1021/ct300798t.
